# Supplementary material for: Ribosome biogenesis restricts innate immune responses to virus infection and DNA
Source: eLife journal article supplement (doi:10.7554/elife.49551), 2019-12-16
Supplement: supp [file elife-49551-supp-v1.zip]

Archive with 10 entries (10 files):
- elife_poa_e49551_Figure_5_figure_supplement_1.pdf
- elife_poa_e49551_Figure_3_figure_supplement_1.pdf
- elife_poa_e49551_Supplementary_file_4.xlsx
- elife_poa_e49551_Figure_4_figure_supplement_1.pdf
- elife_poa_e49551_Figure_5_figure_supplement_2.pdf
- elife_poa_e49551_Supplementary_file_1.xlsx
- elife_poa_e49551_Figure_7_figure_supplement_1.pdf
- elife_poa_e49551_Supplementary_file_3.xlsx
- elife_poa_e49551_Transparent_Reporting_File.docx
- elife_poa_e49551_Supplementary_file_2.xlsx
