# Supplementary material for: Ribosome biogenesis restricts innate immune responses to virus infection and DNA
Source: eLife journal article supplement (doi:10.7554/elife.49551), 2019-12-16
Supplement: supp [file elife-49551-supp-v1.zip › elife_poa_e49551_Figure_3_figure_supplement_1.pdf]

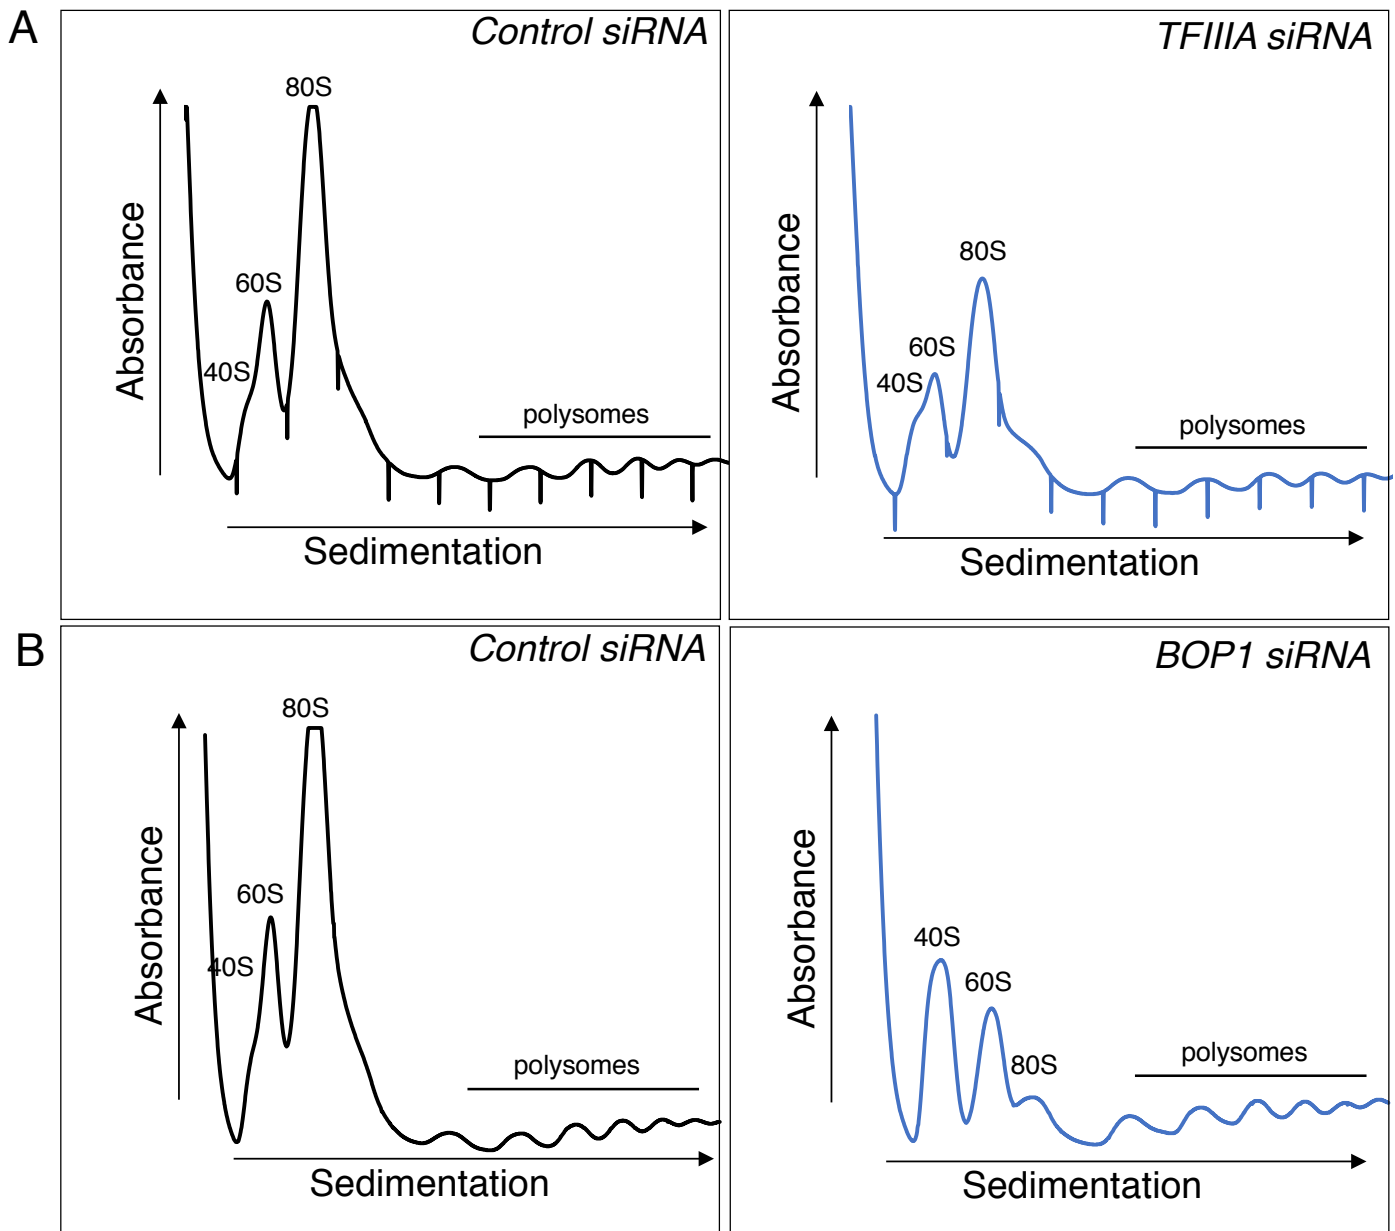

**Figure 3-figure supplement 1. Depletion of TFIIIA or BOP1 Reduce Ribosome Abundances In HCMV Infected Cells.** (a) NHDFs were transfected with ns or TFIIIA siRNA and infected with HCMV (MOI=3PFU/cell.) At 2 dpi, cytoplasmic lysate was fractionated over a 10-50% sucrose gradient to resolve ribosomal subunits, monosomes, and polysomes, and the absorbance at 254nm was recorded. The top of the gradient is on the left. (b) as in (a) except ns and BOP1 siRNA were used.
