# Supplementary material for: Ribosome biogenesis restricts innate immune responses to virus infection and DNA
Source: eLife journal article supplement (doi:10.7554/elife.49551), 2019-12-16
Supplement: supp [file elife-49551-supp-v1.zip › elife_poa_e49551_Figure_4_figure_supplement_1.pdf]

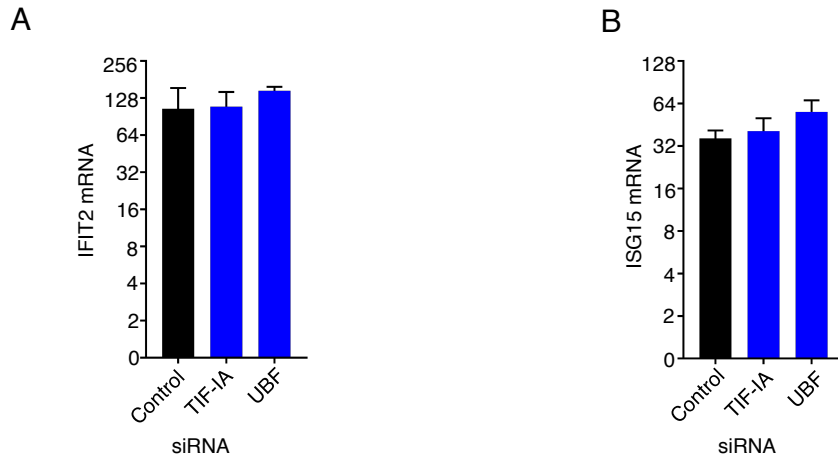

**Figure 4-figure supplement 1. Depletion of RNA Polymerase I Factors Does Not Impact Interferon Signaling.** (a,b) NHDFs were transfected with ns, TIF-1A, or UBF siRNA. After three days, cells were treated with recombinant IFN $\alpha$  for 6 hours, total RNA was isolated, and RT-qPCR was performed using primers specific for (a) IFIT2 mRNA and (b) ISG15 mRNA. (n=3)
