# Supplementary material for: Ribosome biogenesis restricts innate immune responses to virus infection and DNA
Source: eLife journal article supplement (doi:10.7554/elife.49551), 2019-12-16
Supplement: supp [file elife-49551-supp-v1.zip › elife_poa_e49551_Figure_5_figure_supplement_1.pdf]

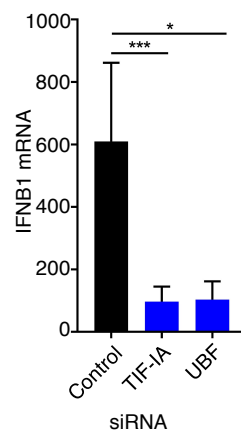

**Figure 5-figure supplement 1. UBF is Required for Efficient dsDNA-induced accumulation of IFNB1 mRNA.** NHDFs were transfected with ns, TIF-1A, or UBF siRNA. After three days, cells were transfected with dsDNA for 6 h, total RNA was isolated, and RT-qPCR was performed using primers specific for IFNB1 mRNA. (n=3)
