# Supplementary material for: Ribosome biogenesis restricts innate immune responses to virus infection and DNA
Source: eLife journal article supplement (doi:10.7554/elife.49551), 2019-12-16
Supplement: supp [file elife-49551-supp-v1.zip › elife_poa_e49551_Figure_5_figure_supplement_2.pdf]

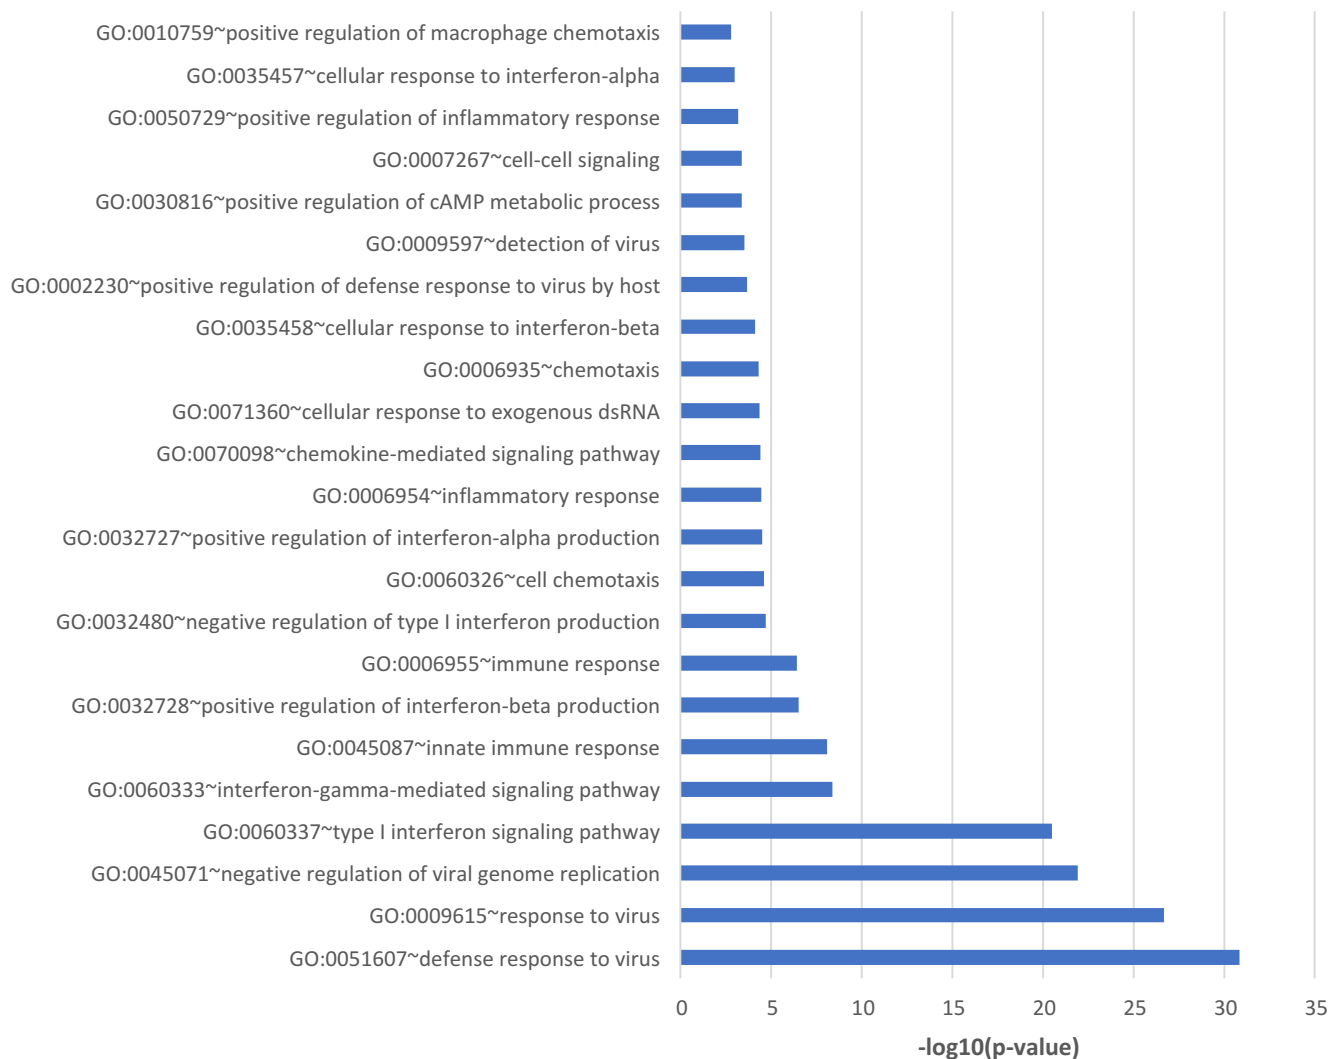

**Figure 5-figure supplement 2. Genome-Wide Responses to dsDNA** Gene ontology analysis (GOTERM\_BP\_DIRECT) of genes upregulated more than  $\log(2)$  in ns siRNA treated dsVacV-70 transfected cells compared to ns siRNA treated cells transfected with no DNA was performed using DAVID Functional Annotation Clustering Tool.
