# Supplementary material for: Ribosome biogenesis restricts innate immune responses to virus infection and DNA
Source: eLife journal article supplement (doi:10.7554/elife.49551), 2019-12-16
Supplement: supp [file elife-49551-supp-v1.zip › elife_poa_e49551_Figure_7_figure_supplement_1.pdf]

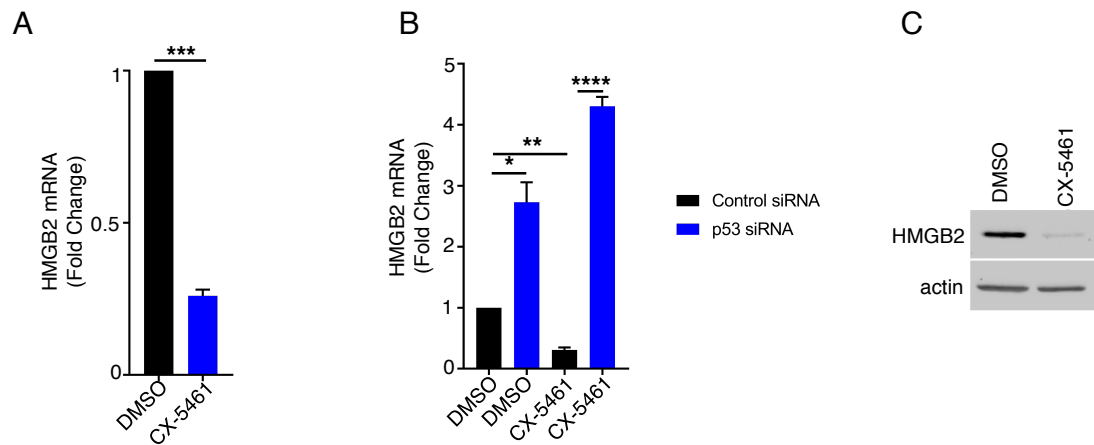

**Figure 7-figure supplement 1. Inhibiting RNA polymerase I reduces HMGB2 abundance in a p53-dependent manner.** (a) NHDFs were treated with DMSO or 1 mM CX-5461. After 3d, total RNA was isolated and RT-qPCR performed using primers specific for HMGB2 mRNA. Error bars indicate SEM. \*\*\*,  $P \leq 0.001$ ; Students t-test. (n=3). (b) NHDFs transfected with the indicated siRNA were treated as in (a). \*,  $P < 0.05$ ; \*\*,  $P < 0.01$ ; \*\*\*\*,  $P < 0.0001$ . (c) As in A except total protein was collected and analyzed by immunoblotting using the indicated antibodies. (n=2).
