# Supplementary material for: Ribosome biogenesis restricts innate immune responses to virus infection and DNA
Source: eLife journal article supplement (doi:10.7554/elife.49551), 2019-12-16
Supplement: supp [file elife-49551-supp-v1.zip › elife_poa_e49551_Supplementary_file_1.xlsx]

## Sheet: Control siRNA
gene	baseMean	log2FC	log2FCunshrunk	pvalue	padj
TNFSF10	232.4	5.59067	7.87107	0	0
PARP10	816.1	2.19749	2.29142	0	0
TDRD7	896.7	2.6301	2.81348	0	0
DTX3L	4036.7	2.35788	2.49258	0	0
IFIT2	66047.5	4.9487	9.20749	0	0
TRIM25	5123.5	2.07749	2.17284	0	0
HELZ2	5163.7	3.29187	3.73829	0	0
STAT2	5975.6	1.3834	1.41115	0	0
BATF2	676.9	4.23782	5.5591	0	0
IDO1	189.2	4.80888	8.63449	0	0
RNF19B	769.3	2.41488	2.58645	0	0
TRIM21	1494.7	2.22936	2.36467	0	0
TMEM140	688.5	2.61147	2.83979	0	0
ETV7	204.6	3.24544	3.74321	0	0
IFIT3	36001.9	4.33309	7.0303	0	0
PRKD2	1066.1	1.75208	1.82235	0	0
CCL5	126.7	4.29426	6.95656	0	0
PARP12	844.5	2.24405	2.39747	0	0
KLHDC7B	238.9	3.00323	3.39213	0	0
MYD88	3180.7	1.73437	1.80722	0	0
IFIT5	1729.2	1.602	1.65855	0	0
OGFR	2040.4	1.73716	1.81098	0	0
TLR3	404.8	2.60623	2.8628	0	0
GBP1P1	93.4	4.01664	5.5445	0	0
IFNB1	64.1	4.19559	9.58363	0	0
SP110	1091.6	2.19942	2.36423	0	0
C19orf66	1527.2	1.55211	1.60681	0	0
PML	3129.2	1.66983	1.7403	0	0
SSTR2	46.3	4.12356	8.21277	0	0
IFIT1	22957.8	4.07526	7.20554	0	0
SPSB1	1102.7	1.73462	1.81863	0	0
CMPK2	883.5	4.04917	7.47444	0	0
DHX58	936.4	1.90444	2.01813	0	0
SLC25A28	1471.3	1.93848	2.06304	0	0
ZNF107	217.6	2.2726	2.48503	0	0
SHOX2	748.7	1.52692	1.58873	0	0
PMAIP1	2662.5	3.50546	4.90264	0	0
DDX60L	1500.1	1.85811	1.97713	0	0
IRF7	777.3	3.05018	3.7067	0	0
SECTM1	1916.1	1.88376	2.01272	0	0
TRIM69	527.5	2.06226	2.2288	0	0
CSF1	5173.7	1.1155	1.14102	0	0
UNC93B1	508.5	1.68159	1.77289	0	0
IFI16	6728.3	1.52542	1.59408	0	0
TRANK1	2158.6	1.71705	1.8193	0	0
IRF2BPL	3581.7	1.08389	1.10812	0	0
TRIM56	2285.1	1.24321	1.28025	0	0
TMEM171	135.1	2.63707	3.04045	0	0
TRIM38	1953.8	1.75313	1.86272	0	0
PNPT1	1617.4	1.79482	1.91544	0	0
C3AR1	49.5	3.46204	4.81335	0	0
SLC15A3	504.4	1.77071	1.88072	0	0
PARP9	2390.7	1.72176	1.82856	0	0
IFI35	1236.4	1.5286	1.59979	0	0
ZCCHC2	678.6	1.75997	1.87444	0	0
LMO2	47.2	3.35444	4.55221	0	0
MX1	5838.3	3.56139	6.00257	0	0
JAG1	936.5	1.27394	1.31631	0	0
APOBEC3G	382.8	2.09525	2.29002	0	0
BBC3	1197	1.17497	1.21014	0	0
ARID5A	1011.7	1.76811	1.89127	0	0
NCOA7	2188.9	1.67434	1.77895	0	0
MX2	1923.6	3.35979	4.88341	0	0
HES4	164.8	1.95015	2.10965	0	0
SLFN5	9655.9	1.53252	1.61387	0	0
KIF5C	58.2	3.24143	4.39543	0	0
ZC3HAV1	9854.6	3.02436	4.02908	0	0
DDX58	5146.4	3.20483	4.57407	0	0
MLKL	407.2	1.65394	1.75834	0	0
NOTCH1	1114.1	1.10773	1.13827	0	0
TRIM5	1266.6	1.41173	1.47588	0	0
SOCS1	565.6	3.35035	5.2752	0	0
CXCL9	38.2	3.35435	8.79394	0	0
THEMIS2	850.9	3.27676	5.18002	0	0
OAS2	2737.7	3.21737	4.77908	0	0
MSX1	328.5	2.17719	2.44723	0	0
PSMB9	629	1.31322	1.36558	0	0
IFIH1	2801.4	3.22219	5.11901	0	0
OAS1	1130.3	3.29787	5.93731	0	0
PHACTR4	1440.3	1.57746	1.6773	0	0
PLEKHA4	1883.3	2.17487	2.46812	0	0
CNP	4535.9	1.35853	1.42218	0	0
RSAD2	2897	3.20522	9.15186	0	0
APOBEC3F	153.6	2.10221	2.34935	0	0
OASL	3593.1	3.23186	10.042	0	0
XAF1	2046.6	1.33795	1.39902	0	0
IRF1	2201	2.53491	3.09773	0	0
PDP1	1643.2	1.38418	1.45332	0	0
DDX60	2058	2.33167	2.74918	0	0
ARHGAP27	150.6	2.37638	2.82929	0	0
FBXO6	222.5	1.71131	1.8405	0	0
NMI	664.4	1.62345	1.7399	0	0
UBE2L6	2705.1	1.22748	1.27585	0	0
RBM43	494.9	1.55091	1.65048	0	0
ISG15	4451.6	2.98063	4.20409	0	0
SAMD9	7071.9	2.74942	3.59871	0	0
GCH1	145.5	2.40894	2.8193	0	0
CXCL10	698.7	3.06854	7.93202	0	0
RNF213	7608	1.20562	1.25247	0	0
DLL1	50.7	2.78059	3.56539	0	0
ARL5B	879.8	1.58888	1.70716	0	0
IFI44	1941.3	2.63285	3.37665	0	0
SGK1	3722.1	1.08923	1.12553	0	0
PTGIR	466.1	1.31265	1.37497	0	0
GBP4	1016.9	3.07846	5.21237	0	0
ELF1	2104.4	1.44359	1.53376	0	0
BCL2L13	3225.2	1.06382	1.0978	0	0
NLRC5	1641.5	1.11007	1.1491	0	0
CD274	1117.2	2.70428	3.6783	0	0
CPEB2	1440.1	1.0452	1.07915	0	0
TAP1	4605.2	2.02707	2.31777	0	0
HERC5	1835.2	2.99953	8.23669	0	0
C11orf96	224.3	1.88817	2.12179	0	0
MCL1	14029.7	0.92457	0.94779	0	0
ATF3	1656.8	2.91008	4.9756	0	0
CEACAM1	27	2.88706	4.88646	0	0
TNFAIP3	753.7	1.57955	1.71096	0	0
TRIM22	4876.1	1.06507	1.10278	0	0
PLEKHF1	576.8	1.06709	1.10456	0	0
RAB20	70.2	2.39041	2.93583	0	0
RP11-134L10.1	119.4	2.47697	3.20307	0	0
OAS3	3378.2	2.53097	3.27029	0	0
NOCT	395.2	1.72088	1.9071	0	0
PI4K2B	345.5	1.52814	1.65086	0	1e-15
PAPD5	643.1	1.43598	1.53692	0	1e-15
PAX3	305.7	1.73755	1.92151	0	1e-15
FAM111A	1154.5	0.98417	1.0148	0	1e-15
KLF6	5935.4	1.1029	1.14737	0	1e-15
BCL6	1746.3	1.11824	1.165	0	1e-15
IL4I1	68	2.42546	3.09806	0	1e-15
CCL2	2883.7	1.99131	2.3221	0	2e-15
ZNFX1	11220.1	2.14029	2.57806	0	3e-15
ISG20	417.5	2.73147	4.29834	0	4e-15
UHRF1BP1	2201.9	1.08451	1.12802	0	5e-15
TYMP	1418.2	1.36615	1.45565	0	5e-15
HERC6	1688	2.5439	3.48525	0	6e-15
IL15RA	459.7	1.35849	1.44653	0	7e-15
USP18	469.5	2.73485	4.36266	0	1e-14
JADE2	776.1	1.14249	1.19527	0	1e-14
CEBPB	3047	0.90901	0.93509	0	1.4e-14
UBA7	1717.5	0.96237	0.99308	0	1.5e-14
TRIM14	1291.1	2.0122	2.3566	0	1.8e-14
PPP1R15A	6161.3	0.83586	0.85636	0	1.8e-14
IL22RA1	18	2.7189	5.19601	0	1.9e-14
ZFP36L2	6371.9	1.93291	2.25224	0	2.1e-14
DUSP4	103.6	2.33529	3.1122	0	2.2e-14
TMEM62	656.6	1.3183	1.40321	0	2.2e-14
LZTS2	4159.1	0.89029	0.91531	0	2.2e-14
RBMS2	2923.9	1.2146	1.28163	0	3.4e-14
CBX4	541.3	1.21684	1.28381	0	3.8e-14
ZC3H12C	463.6	1.6317	1.81177	0	4.4e-14
N4BP1	2031.5	1.15327	1.21024	0	4.8e-14
RBBP6	1609.7	1.18478	1.24765	1e-15	5.6e-14
SAMD9L	3112.5	2.0333	2.42751	1e-15	6.2e-14
APOL6	3764.3	2.05552	2.46679	1e-15	6.3e-14
TNFRSF21	807.4	1.4201	1.53622	1e-15	7e-14
CH25H	1104.6	2.08564	2.51264	1e-15	1.03e-13
GBP3	2279.6	1.0942	1.1436	1e-15	1.14e-13
IRF2	1249.2	1.87302	2.17819	1e-15	1.33e-13
GTPBP1	1863	1.17235	1.23546	1e-15	1.38e-13
CCL8	92.1	2.41666	8.1468	2e-15	1.65e-13
PANX1	2376.9	1.23379	1.30943	2e-15	1.79e-13
CXorf38	484.5	1.22682	1.2977	3e-15	2.45e-13
GMPR	464.3	2.38108	3.21547	3e-15	2.5e-13
EIF2AK2	4058.2	1.68566	1.90514	4e-15	3.42e-13
MASTL	484.3	1.25942	1.34112	5e-15	4.89e-13
ADPRHL2	1337.2	0.98374	1.02124	6e-15	5.24e-13
C21orf91	760.1	2.12403	2.69034	6e-15	5.78e-13
SOD2	11181.2	0.94571	0.97944	7e-15	5.88e-13
KLF9	1502.9	1.04864	1.09595	7e-15	6.22e-13
TTC39B	779.4	1.17762	1.24465	8e-15	7.2e-13
LGALS9	87.7	1.98591	2.38913	1e-14	8.84e-13
SP100	4131.1	1.08448	1.13789	1.7e-14	1.452e-12
PIK3AP1	26.6	2.52887	5.11077	1.8e-14	1.604e-12
GBP2	598.6	1.18672	1.25402	1.9e-14	1.656e-12
LY6E	11165.7	0.65449	0.66564	1.9e-14	1.676e-12
APOL3	844.9	2.13937	2.70318	2.1e-14	1.768e-12
HLA-E	9271	0.84004	0.86413	2.1e-14	1.768e-12
PNRC1	1056.5	0.84847	0.87352	2.3e-14	1.941e-12
BST2	161.7	2.49373	3.56567	2.5e-14	2.095e-12
SAMHD1	1905.4	1.948	2.33956	2.6e-14	2.157e-12
RTP4	320.7	2.3408	3.28639	2.6e-14	2.157e-12
RHEBL1	227	2.5177	4.74034	2.8e-14	2.288e-12
FAM46A	5536.6	1.84577	2.18041	3e-14	2.481e-12
FOXF1	537.3	1.28254	1.3783	3.2e-14	2.619e-12
ADRA1D	132.1	1.63879	1.86213	3.7e-14	3.043e-12
DOK1	1322.3	1.20486	1.28163	3.9e-14	3.152e-12
GPD2	1537.8	1.04029	1.08806	4.1e-14	3.347e-12
AIM2	14	2.42711	8.68566	5.6e-14	4.516e-12
GSDMD	1127.4	0.76177	0.78004	5.9e-14	4.762e-12
HLA-F	698.9	1.15698	1.2229	6.4e-14	5.119e-12
CXCL11	164.8	2.26517	10.0424	6.6e-14	5.19e-12
APOL2	3540.1	2.24713	3.05499	6.8e-14	5.346e-12
ZBTB42	134.1	1.63303	1.83171	8e-14	6.256e-12
ADAR	10515.8	0.85236	0.87883	8.7e-14	6.748e-12
GBP1	4214.9	2.11705	2.66751	1.08e-13	8.41e-12
RASGRP3	93.2	2.01086	2.51643	1.44e-13	1.1133e-11
DUSP7	1642.7	-0.91035	-0.94472	1.61e-13	1.239e-11
DUSP5	1357.6	1.24549	1.33854	1.68e-13	1.2807e-11
CDKN1A	53346.9	0.67024	0.68343	1.69e-13	1.2837e-11
DUSP16	593.8	1.15176	1.22467	1.85e-13	1.3969e-11
FAS	4543	0.90059	0.93396	1.94e-13	1.4632e-11
LRRTM2	39.3	2.22394	3.14218	2.33e-13	1.7421e-11
MAFK	878.2	0.8108	0.83489	2.5e-13	1.8633e-11
PLSCR1	1982.5	1.98352	2.46709	2.55e-13	1.8887e-11
ITGA2	7483	0.99851	1.04534	2.56e-13	1.8887e-11
TOB1	1395.8	0.78861	0.81074	2.58e-13	1.8932e-11
CASP7	1538.3	1.0489	1.10137	2.69e-13	1.9685e-11
FMR1	1089.4	1.06689	1.12541	3.28e-13	2.3852e-11
MAP3K8	173.3	1.66475	1.91107	3.44e-13	2.4894e-11
EPSTI1	930.6	2.14593	2.80616	3.51e-13	2.5291e-11
IL6	2117.6	1.70673	1.98528	3.65e-13	2.6188e-11
C5orf56	174	1.56914	1.76463	3.72e-13	2.6539e-11
HIP1R	1041.2	1.92505	2.38626	3.8e-13	2.6996e-11
PTGER4	47.6	2.26683	3.37636	3.99e-13	2.8209e-11
RNF114	2758.5	1.07148	1.12927	4.1e-13	2.8885e-11
PSMB8	1865.8	0.89578	0.92841	4.31e-13	3.0204e-11
SCO2	641.2	0.89637	0.92989	6.14e-13	4.281e-11
TICAM1	718	0.86453	0.89463	6.48e-13	4.497e-11
ARMCX1	1563.4	0.98198	1.02689	6.51e-13	4.4989e-11
USP42	668.9	1.09855	1.16317	9.8e-13	6.7454e-11
XKR8	672.5	1.15478	1.23411	1.015e-12	6.9519e-11
TNFSF13B	127.4	2.36821	4.03304	1.079e-12	7.357e-11
NAMPT	1837.4	0.99048	1.03836	1.124e-12	7.6291e-11
DCP1A	1356.1	1.05293	1.10936	1.172e-12	7.919e-11
BATF3	52.1	2.08187	2.71715	1.237e-12	8.3224e-11
MAFB	76.9	2.10807	3.03401	1.25e-12	8.374e-11
GNB4	3319	1.05157	1.10888	1.381e-12	9.2126e-11
CMTR1	2120.3	0.62341	0.63461	1.411e-12	9.3671e-11
TGIF1	2011.2	0.83568	0.86359	1.453e-12	9.6046e-11
WHAMM	596.7	1.0446	1.10118	1.459e-12	9.6055e-11
KLF4	4364.4	1.53779	1.74769	1.587e-12	1.04018e-10
GTF2B	880.1	1.13945	1.21589	1.869e-12	1.21965e-10
CCND3	1359.2	0.91316	0.95027	2.078e-12	1.34505e-10
NUDCD1	1416.5	1.13652	1.21221	2.079e-12	1.34505e-10
IFI27	111.9	1.8445	2.20123	2.189e-12	1.41039e-10
SLC20A1	7508.3	-0.68922	-0.70505	2.433e-12	1.55517e-10
IFI44L	669.6	2.24417	3.24856	2.434e-12	1.55517e-10
TNFRSF10B	9771.9	0.58551	0.59522	2.597e-12	1.652e-10
BMP4	181.4	1.67779	1.9678	2.829e-12	1.79266e-10
NCF2	81	1.91682	2.47114	2.953e-12	1.86351e-10
CREBRF	702	1.08052	1.1477	3.819e-12	2.39942e-10
XRN1	1502.9	1.18231	1.27323	4.496e-12	2.81325e-10
RNF149	2118.6	1.52775	1.75372	4.771e-12	2.97357e-10
CASP1	1277.1	0.94791	0.99165	5.131e-12	3.1844e-10
PCGF5	1889	1.58781	1.83266	5.535e-12	3.42165e-10
SIX1	413.1	1.22629	1.32564	5.739e-12	3.53282e-10
EHD4	2324.8	0.96907	1.01602	7.413e-12	4.54515e-10
GPR180	1279.7	0.85967	0.89235	8.259e-12	5.04334e-10
RIPK2	1183	1.11938	1.19607	8.599e-12	5.23022e-10
JAK2	825.5	1.23742	1.34593	1.1187e-11	6.77711e-10
TRAFD1	1652.4	1.07053	1.1364	1.1582e-11	6.98897e-10
ASPHD2	165.2	1.69996	2.01949	1.2572e-11	7.5454e-10
LGALS8	2085.8	0.71002	0.72856	1.2604e-11	7.5454e-10
RNF122	63	1.86709	2.27954	1.2665e-11	7.55251e-10
ACKR4	206.2	1.28376	1.42409	1.5816e-11	9.39438e-10
CTA-384D8.31	23.2	2.20191	3.32459	1.5905e-11	9.41084e-10
CYTH1	832.1	0.86426	0.89868	1.7447e-11	1.02829e-09
HDX	289	1.48182	1.68632	2.0715e-11	1.21617e-09
ZNF710	795.8	0.95863	1.00686	2.1006e-11	1.22852e-09
TTC38	650.1	0.81282	0.84109	2.2474e-11	1.30934e-09
GIMAP2	57.7	1.96332	2.51794	2.2591e-11	1.31116e-09
NEURL3	11.6	2.11618	8.32231	2.2865e-11	1.322e-09
SLC2A12	357.4	1.19555	1.29337	2.3068e-11	1.32867e-09
LRRN3	820.7	2.08333	3.19658	2.3416e-11	1.34363e-09
STOML1	638.9	0.86623	0.90089	2.3606e-11	1.34947e-09
B3GALNT1	462.6	1.15814	1.2476	2.3893e-11	1.36073e-09
SMARCA5	5870.1	1.00129	1.05803	2.6533e-11	1.50548e-09
CPEB3	133.6	1.60736	1.91044	2.686e-11	1.51832e-09
GCNT1	632.3	1.13789	1.22161	3.041e-11	1.71267e-09
PPM1K	649.8	1.98144	2.69711	3.9412e-11	2.21146e-09
DENND3	491.2	1.09619	1.17395	4.0777e-11	2.27964e-09
PATL1	3500.7	0.89858	0.93955	4.3209e-11	2.40673e-09
KBTBD2	1358.4	0.75378	0.77716	4.6855e-11	2.60029e-09
MOB3C	824.9	0.81204	0.84153	5.7724e-11	3.19183e-09
AVPI1	900.9	0.97815	1.03286	7.2632e-11	4.0016e-09
ABL2	4538.5	0.7133	0.7337	7.5387e-11	4.13838e-09
MEGF9	1158.5	1.13965	1.23142	7.6229e-11	4.16959e-09
RP3-508I15.21	32.5	2.01993	2.91942	9.1983e-11	5.01324e-09
SNAI2	2200.3	-0.76483	-0.7913	9.6518e-11	5.24159e-09
ZFYVE26	2902.5	0.90919	0.95391	1.07733e-10	5.82983e-09
NFKBIZ	1231	1.69588	2.0983	1.10558e-10	5.96153e-09
C3orf38	856.7	1.02206	1.08653	1.29809e-10	6.97484e-09
RBCK1	3670.3	0.55471	0.56435	1.39791e-10	7.48475e-09
BIRC3	438.6	1.16168	1.26609	1.48985e-10	7.949e-09
RP11-54O7.17	19.7	2.1223	4.57259	1.51393e-10	8.04925e-09
GDF15	3323	0.91989	0.96973	1.71623e-10	9.09305e-09
AKAP5	25.6	2.08862	3.0462	1.96446e-10	1.03721e-08
MICB	1206.5	0.92124	0.96987	2.04355e-10	1.07523e-08
ANGPTL1	307.2	1.86795	2.45585	2.444e-10	1.2815e-08
TRIM26	2897.4	1.59294	1.91961	2.601e-10	1.35913e-08
RICTOR	1106.9	0.99153	1.05345	2.90614e-10	1.51338e-08
C22orf29	939.7	-0.85627	-0.89465	2.98901e-10	1.55123e-08
FEM1C	1059	0.97126	1.02991	3.00594e-10	1.55471e-08
CFB	53.8	1.65339	2.00153	3.14e-10	1.61854e-08
RARRES3	592.5	1.61256	1.94685	3.59192e-10	1.84523e-08
SYNE3	808.4	0.89312	0.93808	3.60469e-10	1.84556e-08
PIK3R3	539.2	1.89439	2.56269	3.67935e-10	1.87745e-08
HS3ST3B1	888.1	1.12254	1.21657	3.69842e-10	1.88087e-08
ODF3B	101.1	1.51883	1.76433	3.90817e-10	1.98092e-08
GPR161	986.5	1.07046	1.15115	4.01211e-10	2.02685e-08
MED13L	5711.9	0.83399	0.87058	4.04353e-10	2.03596e-08
IL18BP	212.7	1.36226	1.53196	4.33525e-10	2.17564e-08
OTUD4	1762.3	0.88834	0.93266	4.49096e-10	2.24637e-08
DACT1	876	-0.80419	-0.83641	4.62516e-10	2.30591e-08
CSRNP1	1071.9	1.03112	1.10337	4.78561e-10	2.3781e-08
C16orf47	8.9	1.97548	6.47784	4.93725e-10	2.44547e-08
SYNM	174.3	1.49057	1.72703	4.95612e-10	2.44684e-08
AFF1	1797.8	0.78015	0.81009	5.57875e-10	2.74532e-08
FAM65B	428.3	1.76696	2.30718	5.84148e-10	2.86534e-08
B3GNT2	486	1.19522	1.31686	6.9709e-10	3.401e-08
ITPRIP	4495.4	0.78373	0.8145	6.97824e-10	3.401e-08
WASHC4	3146.8	0.79244	0.82441	7.1816e-10	3.48893e-08
RAB8B	1486.5	0.74686	0.77302	7.92371e-10	3.8372e-08
TMEM229B	98.8	1.53204	1.81229	8.01677e-10	3.86994e-08
BRCA2	279.8	1.925	2.78611	8.41364e-10	4.04866e-08
TGIF2	473.7	0.88492	0.93016	8.79181e-10	4.21729e-08
KCNE4	406.4	1.04143	1.11495	1.15031e-09	5.48353e-08
ZNF267	391.9	1.2073	1.34247	1.15037e-09	5.48353e-08
ELMO2	2211.6	0.79501	0.82813	1.18435e-09	5.62787e-08
B4GALT5	2711.5	0.84489	0.88502	1.22508e-09	5.80327e-08
STARD5	215.4	1.09715	1.18871	1.23302e-09	5.82276e-08
LNPEP	1177.4	0.82481	0.86185	1.36745e-09	6.43517e-08
BTN3A3	805	0.80258	0.83626	1.37116e-09	6.43517e-08
RUBCN	1155.6	0.86838	0.91262	1.45502e-09	6.8077e-08
GBP7	7.9	1.88	4.91055	1.49027e-09	6.95122e-08
BLZF1	1502.5	0.90109	0.95084	1.50984e-09	7.02096e-08
TCF4	2980.8	0.81091	0.84716	1.5566e-09	7.21636e-08
GPBP1	2051.1	0.92596	0.98087	1.60482e-09	7.41731e-08
TEP1	1254.1	0.6131	0.62797	1.61919e-09	7.46103e-08
STAT1	14411.7	1.40309	1.62545	1.65348e-09	7.59601e-08
TAP2	1073.5	0.89929	0.94905	1.7289e-09	7.91855e-08
BAZ2A	4636.9	0.64111	0.65856	2.09126e-09	9.54944e-08
NR4A3	209	1.13573	1.25457	2.14566e-09	9.76092e-08
IFITM1	1087.7	1.63286	2.01171	2.15041e-09	9.76092e-08
RAD9A	212.7	1.21761	1.34915	2.21216e-09	1.00113e-07
RGS4	2224.2	-0.70818	-0.73305	2.21985e-09	1.00163e-07
ERAP2	126.7	1.42428	1.65948	2.29048e-09	1.03044e-07
PHF23	1709.2	-0.68663	-0.70943	2.48808e-09	1.11604e-07
GRINA	7437.9	0.49769	0.50579	2.52825e-09	1.13072e-07
REV3L	5313.3	0.66415	0.6842	2.67856e-09	1.19443e-07
GRIP2	9.9	1.92334	4.12102	2.70235e-09	1.20152e-07
ZMYND15	21.1	1.9566	3.08919	2.94465e-09	1.30543e-07
SPATA13	756.9	1.01548	1.09261	3.02842e-09	1.33867e-07
ANKFY1	3715.7	0.60037	0.61509	3.97446e-09	1.75176e-07
BRIP1	242.3	1.38534	1.58761	4.20229e-09	1.84682e-07
HOXD13	78.5	1.40167	1.61686	4.55867e-09	1.99767e-07
ITPRIPL2	3983.2	0.81758	0.85693	4.83038e-09	2.11065e-07
ADAP1	79.7	1.4273	1.67695	5.14891e-09	2.24339e-07
CXCL16	164.3	1.26263	1.42274	5.27871e-09	2.29337e-07
NFE2L3	185.5	1.14215	1.25767	6.07354e-09	2.63117e-07
PRKX	332.2	0.89655	0.95627	6.50805e-09	2.81141e-07
FZD4	795.3	1.48525	1.81821	6.99669e-09	3.01393e-07
GBP5	38.8	1.65382	10.1886	7.11072e-09	3.05439e-07
STOM	8166.5	0.51088	0.52032	7.60452e-09	3.2573e-07
CCNL1	1450.6	0.75369	0.78521	7.8449e-09	3.35083e-07
FAM53A	66.7	1.44882	1.73192	8.07357e-09	3.4293e-07
GTPBP2	4193.8	0.53743	0.54832	8.07372e-09	3.4293e-07
RASEF	101.5	1.52268	1.9435	8.55736e-09	3.6246e-07
CACNA1A	249.3	1.01149	1.09272	8.89564e-09	3.75742e-07
BAMBI	450.7	1.84713	2.87261	9.74257e-09	4.10375e-07
IRS2	2009.4	0.57402	0.58758	9.94057e-09	4.17559e-07
TBX3	6154.4	0.56337	0.57625	1.00528e-08	4.21111e-07
MXD1	803.2	1.05031	1.14575	1.11402e-08	4.65381e-07
MAB21L1	1141	-0.78495	-0.82142	1.12355e-08	4.68075e-07
RP2	1109.3	0.93266	0.99922	1.23853e-08	5.14565e-07
PTGS2	1519.9	1.78891	2.70659	1.27299e-08	5.27441e-07
RP4-663N10.1	57.4	1.51005	1.94185	1.35676e-08	5.60623e-07
MAP2K6	95.9	1.26455	1.42312	1.41144e-08	5.81638e-07
SDPR	160.6	1.33677	1.59519	1.42459e-08	5.85469e-07
ZNF618	1568.9	0.84608	0.89354	1.44205e-08	5.91046e-07
FAM196B	289	-0.8805	-0.9308	1.55137e-08	6.34144e-07
APOL1	665.5	1.59866	2.05924	1.612e-08	6.57161e-07
RCAN1	4066.9	0.67783	0.70152	1.63281e-08	6.63863e-07
BAZ1A	2014	0.84554	0.89322	1.7271e-08	7.00326e-07
MAP4K4	16314.5	0.75753	0.79139	1.73905e-08	7.03298e-07
LAP3	2429.1	1.38989	1.64485	1.81993e-08	7.34054e-07
IKZF2	268.5	1.00638	1.08857	1.90406e-08	7.65957e-07
ANO7L1	35.1	1.71961	2.2886	1.93981e-08	7.78278e-07
IFI6	4175.9	1.74654	2.4311	2.03214e-08	8.13176e-07
SAV1	1074.5	0.68479	0.70972	2.05718e-08	8.21038e-07
SMCHD1	2456.4	0.69989	0.72651	2.11059e-08	8.38559e-07
P2RX7	117.5	1.32434	1.52817	2.11211e-08	8.38559e-07
PAPD7	1060	0.65501	0.67633	2.14447e-08	8.49187e-07
HK2	3092.7	1.36313	1.63351	2.28977e-08	9.0437e-07
CD38	18.8	1.85395	3.06428	2.34549e-08	9.23976e-07
AGRN	9995.3	0.45988	0.46719	2.5966e-08	1.02026e-06
ZNF844	335	-0.9556	-1.03096	2.85642e-08	1.11887e-06
AC009948.5	120.8	1.16513	1.29462	2.86229e-08	1.11887e-06
RBMXL1	436.2	0.85686	0.90842	2.93089e-08	1.14275e-06
C6orf62	6192.8	0.65416	0.67605	3.30006e-08	1.2834e-06
CCDC117	1398.9	1.29687	1.51172	3.35983e-08	1.3033e-06
GCNT4	290.9	0.97213	1.04689	3.54932e-08	1.37331e-06
PLA2G4A	698.5	1.46185	1.85227	3.84561e-08	1.48417e-06
GPATCH11	387.1	-0.79803	-0.84073	3.9609e-08	1.5248e-06
SAMD4A	2448.9	0.85081	0.90293	4.01049e-08	1.53999e-06
RRAGC	1369	0.64073	0.66222	4.18701e-08	1.60372e-06
BTN3A1	1185.6	0.68786	0.71385	4.33022e-08	1.6544e-06
RP11-463O12.3	10.3	1.75911	6.25064	4.57583e-08	1.74386e-06
CD164	11840	0.53553	0.54773	4.6759e-08	1.77754e-06
IRF9	72.4	1.30622	1.52963	4.71755e-08	1.78891e-06
SCAMP1-AS1	82.6	1.33775	1.56968	4.8989e-08	1.85305e-06
NEDD1	1705.3	0.80938	0.85379	5.25585e-08	1.98093e-06
PPP1R3C	3747.2	-1.51788	-1.97796	5.26303e-08	1.98093e-06
PRDM8	382.2	0.95589	1.0321	5.35365e-08	2.01006e-06
CSTF1	832	-0.55842	-0.57309	5.448e-08	2.04045e-06
FGF5	1908.7	0.6696	0.69428	5.48939e-08	2.0509e-06
RDH14	373.2	0.78453	0.82528	5.58424e-08	2.08123e-06
GLRX	2172.7	0.65816	0.68155	5.61317e-08	2.08689e-06
LIFR	826.8	0.80168	0.84631	5.67598e-08	2.1051e-06
PCDH17	22.6	1.80285	2.99777	5.72342e-08	2.11753e-06
DNAJA1	7387.2	0.69732	0.72538	6.20168e-08	2.2889e-06
MFSD12	2059.3	0.60006	0.61762	6.27245e-08	2.30942e-06
SPDL1	3539.4	-0.58188	-0.59817	6.62399e-08	2.43296e-06
NT5C3A	534.3	0.91455	0.98252	7.10061e-08	2.60173e-06
CCNJ	430.5	1.03629	1.13817	7.4918e-08	2.73847e-06
LGALS3BP	3002	0.55948	0.57373	7.84538e-08	2.86084e-06
NMRAL2P	258.6	1.2003	1.37996	8.61641e-08	3.1308e-06
MEX3B	117.2	-1.29206	-1.60653	8.62691e-08	3.1308e-06
NCEH1	1671.1	0.67609	0.70247	9.0101e-08	3.26209e-06
VSIG10L	100.9	1.19089	1.3608	9.11863e-08	3.29354e-06
ATF5	615.8	0.9359	1.01313	9.80703e-08	3.53379e-06
THSD1	170.6	1.21721	1.42548	9.93488e-08	3.57139e-06
TBX15	1126.6	0.62143	0.64204	1.22996e-07	4.41104e-06
PROX1	27.8	1.72217	2.75735	1.24136e-07	4.44145e-06
GAL3ST4	692.7	0.68688	0.7156	1.31537e-07	4.69521e-06
RAB9A	797.3	0.76221	0.80187	1.33233e-07	4.74459e-06
TYSND1	250.5	0.96494	1.0483	1.39999e-07	4.97389e-06
PPP2R2A	1898.8	0.78155	0.82462	1.43536e-07	5.08765e-06
SSH2	889.7	0.64706	0.67086	1.56337e-07	5.52852e-06
CFLAR	2272.4	0.71538	0.74811	1.57641e-07	5.56167e-06
PELI1	264.2	0.97211	1.06518	1.5859e-07	5.58222e-06
AVIL	111.5	1.221	1.42409	1.60541e-07	5.63784e-06
PPRC1	2416.5	-0.5862	-0.60395	1.6296e-07	5.69842e-06
SLFN12	319.8	0.92324	0.99745	1.63016e-07	5.69842e-06
CCSAP	290.1	1.17851	1.35544	1.69904e-07	5.92559e-06
BAG1	1857.2	0.71805	0.75146	1.72653e-07	6.00769e-06
RBFOX2	8596.3	0.51365	0.52539	1.81608e-07	6.30485e-06
KMT2E	2343.9	-0.42437	-0.43097	1.85842e-07	6.43715e-06
RORB	11.4	1.70072	3.85892	1.89311e-07	6.54241e-06
RET	25.1	1.67876	2.58692	1.90038e-07	6.54859e-06
RP11-757G1.6	82.5	1.62021	4.98774	1.90351e-07	6.54859e-06
ARRDC4	3670.8	-0.67015	-0.69793	2.10626e-07	7.22973e-06
CHRM2	1072.8	-0.53741	-0.55093	2.14711e-07	7.35337e-06
MLLT3	838.3	0.7038	0.73577	2.24631e-07	7.67582e-06
ACSL3	3998.7	0.64289	0.66704	2.33524e-07	7.96179e-06
CBR3	308.3	0.81238	0.86118	2.40003e-07	8.16439e-06
SOX13	311.8	0.89917	0.96927	2.41577e-07	8.19958e-06
RPS6KC1	2163.3	0.82398	0.87779	2.53919e-07	8.58038e-06
NAPA	2080.1	0.50977	0.52156	2.53924e-07	8.58038e-06
FZD5	21.7	1.70119	2.71277	2.56472e-07	8.64726e-06
GALNT3	33.3	1.63204	2.60846	2.94228e-07	9.89829e-06
CXXC5	2853.9	-0.54251	-0.5569	2.99211e-07	1.00437e-05
MB21D1	126.8	1.20905	1.39689	3.02993e-07	1.01483e-05
RNF217	661.8	0.69052	0.72175	3.11845e-07	1.04218e-05
RP11-449P15.2	18.4	1.68135	2.93669	3.41876e-07	1.14004e-05
ZNF48	243.2	-0.83478	-0.89145	3.52927e-07	1.17431e-05
RSPO3	274.8	0.79079	0.83991	3.64653e-07	1.21068e-05
ACTN2	10	1.61478	6.15122	3.74517e-07	1.24072e-05
KLF11	558.1	0.60701	0.62778	3.77627e-07	1.2483e-05
ZBTB43	630.5	0.77204	0.81842	3.81597e-07	1.25869e-05
RELA	2974.9	0.65476	0.6813	3.87035e-07	1.27387e-05
LGMN	2899.4	0.69847	0.73113	4.07661e-07	1.33885e-05
RORA	283.4	0.93006	1.01589	4.30683e-07	1.41142e-05
KRT17	197.1	1.05564	1.20278	4.33224e-07	1.41669e-05
BCL10	1077.4	0.68588	0.71724	4.36048e-07	1.42286e-05
GLCCI1	280.9	0.85651	0.92119	4.47786e-07	1.45804e-05
IKBKE	944	0.53189	0.54576	4.51942e-07	1.46843e-05
MDM2	6511.9	1.03993	1.17239	4.6604e-07	1.511e-05
CSRNP2	1896.1	0.66128	0.68921	4.79572e-07	1.55157e-05
UBXN2A	809.2	0.6994	0.73244	5.00543e-07	1.61598e-05
MFSD14A	111.2	1.14444	1.31453	5.1055e-07	1.64479e-05
SLC25A25	812.3	0.61595	0.63824	5.13564e-07	1.65101e-05
MAP4K3	1600.4	0.56679	0.58428	5.18117e-07	1.66213e-05
KIAA0040	53.9	1.59444	2.61932	5.21602e-07	1.66978e-05
TNFAIP6	1021.4	0.68242	0.71304	5.42844e-07	1.73414e-05
SLC1A3	73.1	1.48118	2.10067	5.81139e-07	1.85258e-05
GNA13	2210.5	0.55198	0.56813	5.96272e-07	1.89684e-05
SCAMP1	912.4	0.63104	0.65592	6.30128e-07	1.99846e-05
RGS16	37.9	1.58056	2.44803	6.30843e-07	1.99846e-05
ZNF503	712.6	-0.81755	-0.87199	6.40602e-07	2.02516e-05
CDK20	465.8	0.77145	0.81857	6.44132e-07	2.03209e-05
RGS2	121.7	-1.29476	-1.60431	6.53792e-07	2.0583e-05
BTN2A1	1217.1	0.55718	0.57392	6.64201e-07	2.08674e-05
STARD4	2090.4	0.54895	0.56483	6.97963e-07	2.1883e-05
TAF8	473.5	0.71425	0.7506	7.22755e-07	2.26136e-05
ATXN7	840.2	0.64638	0.67355	7.48834e-07	2.33555e-05
MOV10	1927.2	0.50578	0.51819	7.49537e-07	2.33555e-05
AC025171.1	92.9	1.06761	1.19535	7.59284e-07	2.35821e-05
EPHA2	1948.6	0.58599	0.60597	7.59911e-07	2.35821e-05
OPTN	7037.7	0.54253	0.55819	7.9384e-07	2.45848e-05
NUB1	2853.3	0.60356	0.62536	8.16459e-07	2.52339e-05
BTN3A2	1144.3	0.5395	0.55476	8.57509e-07	2.64489e-05
PARP14	3746.5	1.25654	1.50998	8.64161e-07	2.66001e-05
RP11-156K23.3	47.4	1.38004	1.815	8.80956e-07	2.70622e-05
DAB2IP	2025.5	0.5877	0.60797	8.91753e-07	2.73387e-05
MTMR11	471.9	0.74223	0.78346	9.01441e-07	2.75801e-05
ANTXR2	4211.1	0.59346	0.6147	9.40973e-07	2.87318e-05
ADO	1190.1	-0.488	-0.50002	9.78314e-07	2.98121e-05
MORC3	1171.4	0.63644	0.66306	9.83855e-07	2.9921e-05
SLC16A4	333.6	0.79819	0.85074	1.02444e-06	3.10932e-05
YEATS2	2726.5	0.60402	0.62651	1.15871e-06	3.50983e-05
LPAR6	153.2	0.98628	1.09326	1.17422e-06	3.54873e-05
NT5E	12907	0.42666	0.43445	1.17622e-06	3.54873e-05
RGL1	1759.6	0.70728	0.74463	1.18931e-06	3.58111e-05
TSKU	1710.1	1.11361	1.29141	1.19456e-06	3.58983e-05
CLEC2B	244.3	0.83445	0.90191	1.21651e-06	3.64858e-05
MED25	943.8	0.57517	0.59453	1.23439e-06	3.69089e-05
NRP2	1722.1	0.66748	0.69814	1.23567e-06	3.69089e-05
SERPINB9	155.3	1.08131	1.22436	1.2379e-06	3.69089e-05
MEF2C	240.1	1.00234	1.11934	1.24201e-06	3.69589e-05
WDCP	404.7	-0.6651	-0.69718	1.24836e-06	3.70752e-05
CLDN23	44.2	1.5329	2.16584	1.27105e-06	3.76756e-05
TNFAIP8	720.4	0.76704	0.81782	1.29831e-06	3.84087e-05
HMGB2	438.4	-0.62815	-0.64948	1.30233e-06	3.84528e-05
FAM76A	311.2	0.80853	0.86587	1.31158e-06	3.8648e-05
RP3-508I15.14	13.5	1.60557	3.25594	1.31402e-06	3.8648e-05
KCTD7	561.7	-0.66325	-0.69358	1.3507e-06	3.96502e-05
PLAUR	2595.2	0.41357	0.42072	1.45953e-06	4.27622e-05
ARHGAP20	476.2	1.31048	1.62222	1.47815e-06	4.32245e-05
ZCCHC14	1731.8	0.65733	0.68841	1.5039e-06	4.38932e-05
HOXC-AS2	34.3	1.53059	2.21231	1.59932e-06	4.65886e-05
ELF4	2914.5	0.69236	0.7285	1.61988e-06	4.70973e-05
LRRC75A	41.1	1.42637	1.93533	1.64363e-06	4.76967e-05
NBN	1975.1	0.52875	0.54399	1.66992e-06	4.83673e-05
AMMECR1	1041.1	0.56543	0.58498	1.73736e-06	5.02248e-05
AKAP7	135.2	1.04213	1.17967	1.7642e-06	5.0904e-05
MAP3K1	417.7	-0.74901	-0.80452	1.81488e-06	5.22671e-05
TMX1	1404.7	0.57407	0.59412	1.83472e-06	5.27386e-05
HLA-C	10985.5	0.41711	0.42455	1.84877e-06	5.30423e-05
ELFN1	1799.6	0.61099	0.63565	1.89954e-06	5.43963e-05
NET1	1297.7	-0.51434	-0.52948	1.94728e-06	5.56585e-05
FAM26E	1927	1.18825	1.4241	1.96123e-06	5.59521e-05
CCDC8	667.8	-0.67327	-0.70616	1.99336e-06	5.67622e-05
EDN1	259.8	1.47769	2.08263	2.09203e-06	5.94606e-05
NECTIN2	3735.8	0.55581	0.57416	2.12177e-06	6.01933e-05
NEDD9	803.7	1.33055	1.70903	2.20582e-06	6.24614e-05
RRM2B	2744.7	0.61985	0.64667	2.24526e-06	6.346e-05
RAB24	142	0.87641	0.95563	2.33325e-06	6.58244e-05
SRGAP2	1226.5	0.50462	0.51843	2.35907e-06	6.64298e-05
TMBIM1	5371.2	0.55618	0.5748	2.43535e-06	6.8451e-05
RGS20	168.1	1.00842	1.16323	2.47098e-06	6.93241e-05
SH3RF1	2843.5	0.60225	0.62658	2.5425e-06	7.11993e-05
ACVR2A	1095.4	-0.50222	-0.5151	2.54737e-06	7.12047e-05
FYTTD1	3117.4	0.52947	0.54546	2.58964e-06	7.22534e-05
ING1	446.6	0.80762	0.87033	2.61684e-06	7.28787e-05
SLC5A3	1413.4	0.59463	0.61769	2.63656e-06	7.32934e-05
LOXL3	5882.7	0.48106	0.49298	2.65256e-06	7.36038e-05
HLA-H	935.9	0.48431	0.49643	2.73151e-06	7.56563e-05
SMARCA5-AS1	16.7	1.55007	2.76724	2.76193e-06	7.63598e-05
AIDA	435.3	0.72496	0.76885	2.77083e-06	7.64669e-05
LDOC1L	2464.4	-0.42144	-0.42928	2.82558e-06	7.78365e-05
AP001258.4	153.6	0.90089	0.99174	3.06428e-06	8.4151e-05
STK24	4350.1	0.54498	0.56301	3.06587e-06	8.4151e-05
RP5-1052M9.1	449.9	-0.8733	-0.9606	3.10753e-06	8.51407e-05
SMOX	1088.7	0.61235	0.63816	3.19862e-06	8.74789e-05
ANGPTL4	551.2	0.8031	0.87315	3.28261e-06	8.96147e-05
LACTB	765.4	0.57574	0.59712	3.39705e-06	9.24367e-05
S1PR3	5040.1	0.51785	0.53329	3.39814e-06	9.24367e-05
RNF152	180.6	1.01711	1.16248	3.56132e-06	9.66956e-05
PSME2	1717.7	0.46716	0.4783	3.56742e-06	9.66956e-05
ZNF331	399.1	-0.70914	-0.75348	3.58493e-06	9.69971e-05
CTGF	23564.1	0.47676	0.48865	3.65969e-06	9.87977e-05
THAP3	416.3	0.7695	0.82344	3.66447e-06	9.87977e-05
SLC6A9	2450.3	0.5103	0.52506	3.69333e-06	9.93997e-05
TMEM47	5073.7	0.55774	0.57751	3.71533e-06	9.98151e-05
RFK	702.6	0.67817	0.71565	3.72551e-06	9.99121e-05
FAM84B	30.1	1.45143	2.2114	3.75355e-06	0.000100487
NR4A2	85.5	1.23518	1.55114	3.81888e-06	0.000102056
ZNF398	674.6	-0.66288	-0.69963	3.83042e-06	0.000102185
RMI2	54.4	1.24733	1.51521	3.84286e-06	0.000102337
CORO6	160.2	0.93606	1.04206	3.85758e-06	0.00010255
RP11-864N7.2	609.9	-0.85825	-0.94012	3.98383e-06	0.000105663
KDM5B	4039.6	-0.41851	-0.42681	3.9886e-06	0.000105663
SRSF7	2616.8	-0.41958	-0.42774	4.33307e-06	0.000114589
USP28	938.6	0.53378	0.55105	4.45457e-06	0.000117597
CTSS	195.1	0.98701	1.1242	4.53522e-06	0.000119519
SQRDL	1275.9	1.14024	1.37087	4.61612e-06	0.000121441
PLEKHG4B	8.1	1.46817	3.14724	4.8046e-06	0.000126181
RNF31	592.4	0.58364	0.60666	4.84767e-06	0.000127092
B3GALT2	68.8	1.18406	1.4085	4.85715e-06	0.000127122
ZBED5	713.1	0.67683	0.71426	4.87326e-06	0.000127324
TMEM173	2242.5	0.46807	0.47968	5.07292e-06	0.000132314
TESK2	125.7	1.00613	1.14333	5.09957e-06	0.000132781
SEMA3D	1815.4	0.72726	0.77477	5.17118e-06	0.000134415
XIAP	1563.5	0.60222	0.62831	5.20537e-06	0.000135073
ANGPTL2	8072.5	0.96129	1.08771	5.22499e-06	0.000135351
APOL4	35.5	1.32632	1.64604	5.28373e-06	0.00013664
ZNF555	187.8	-0.81924	-0.89446	5.29383e-06	0.000136669
GEMIN4	525.8	-0.57569	-0.59901	5.43161e-06	0.000139988
KDSR	3359	0.47846	0.49125	5.5567e-06	0.00014297
SETDB2	758.1	0.61952	0.64793	5.63708e-06	0.000144793
ARRDC3	2912.5	0.63641	0.66763	5.66366e-06	0.00014523
SNHG1	631.8	-0.52406	-0.54031	5.74302e-06	0.000147017
HAPLN3	508.2	0.58663	0.60972	5.96455e-06	0.000152432
FHDC1	92.4	1.00229	1.1332	5.9834e-06	0.000152657
HAS2	4527.2	-0.43615	-0.44596	5.99474e-06	0.00015269
SDCBP	5728	0.38626	0.39285	6.05527e-06	0.000153974
OSBPL3	4617.1	0.44455	0.45472	6.0837e-06	0.000154439
ALDH1B1	1037.1	-0.47998	-0.49227	6.16229e-06	0.000156173
TAPBP	4553.6	0.44599	0.45627	6.31148e-06	0.000159688
ANXA2R	32.8	1.3928	1.90282	6.51452e-06	0.000164551
PLCB4	1010.2	0.78635	0.84968	6.53563e-06	0.000164811
WWTR1	3918.6	0.52483	0.542	6.55205e-06	0.000164951
KIAA1755	703	0.74566	0.79717	6.5818e-06	0.000165426
HPSE	51.5	1.25994	1.56346	6.88008e-06	0.000172638
REC8	88.7	1.07729	1.27042	6.91339e-06	0.000173188
SRSF3	5168.7	-0.34057	-0.34516	6.93115e-06	0.000173347
ZNF365	150.6	-0.89974	-1.00333	6.96895e-06	0.000174006
ZNF441	281.9	-0.73735	-0.79214	6.99033e-06	0.000174254
PDZD2	7.9	1.41465	3.06901	7.50795e-06	0.000186851
KLHL38	25.7	1.44496	2.36895	7.58114e-06	0.000188364
ADNP	2721.6	-0.4054	-0.41328	7.60121e-06	0.000188555
SH2D5	388.9	0.66213	0.70242	7.69877e-06	0.000190664
SOAT1	2084.3	0.50722	0.52284	7.74537e-06	0.000191506
ELOVL6	846.3	0.60611	0.63382	7.80809e-06	0.000192743
AJUBA	1716.1	-0.58806	-0.61335	7.82922e-06	0.000192951
AMPD2	2985.1	-0.44512	-0.45583	8.21334e-06	0.000202091
PLEKHF2	313.7	0.72585	0.77583	8.31364e-06	0.000204228
PRAG1	754.3	-0.65788	-0.69504	8.38462e-06	0.00020564
TEF	252.1	-0.74689	-0.79935	8.55091e-06	0.00020938
HLA-L	752.9	0.44831	0.45897	8.69201e-06	0.000212493
TBX5-AS1	1538	0.50499	0.52052	8.70983e-06	0.000212587
WDR25	388.5	0.66406	0.70048	8.80958e-06	0.000214677
IRF2BP2	2494.8	0.45001	0.46104	8.96055e-06	0.000218007
KBTBD6	227.4	-0.8151	-0.89399	9.01508e-06	0.000218983
BACH1	3120.4	0.50948	0.52585	9.05531e-06	0.000219609
RP11-273G15.2	117.6	0.94474	1.06347	9.18641e-06	0.000222434
URB2	525.4	-0.55462	-0.57456	9.38415e-06	0.000226861
VEGFC	6974.3	0.47977	0.49322	9.53257e-06	0.000230083
KTI12	420	-0.59459	-0.62289	9.65907e-06	0.000232454
USF1	920.1	0.61818	0.64771	9.6749e-06	0.000232454
NOD1	384.1	0.66112	0.69727	9.67665e-06	0.000232454
IL21R	305.8	-0.76759	-0.83224	9.75202e-06	0.000233567
ETV3	1240.5	0.69638	0.74037	9.75372e-06	0.000233567
RUNX1T1	1023.4	-0.55065	-0.57199	9.9321e-06	0.000237465
ZNF416	251.1	-0.69535	-0.74327	1.01805e-05	0.000243022
TINF2	2050.5	0.50718	0.5232	1.02458e-05	0.000244197
IL15	262.3	0.77215	0.83212	1.02796e-05	0.000244619
SPATS2L	6497.8	0.51805	0.53538	1.08876e-05	0.000258682
GJD3	100.9	0.90741	1.00877	1.11513e-05	0.000264535
TRAF3IP2	1213.3	0.50768	0.52396	1.13794e-05	0.000269526
RPL21P16	171.5	-0.95061	-1.09413	1.18507e-05	0.000280251
FAM83G	2066.4	-0.41775	-0.42672	1.20175e-05	0.000283755
IFITM3	18623.3	0.40059	0.40844	1.21097e-05	0.000285487
ZADH2	1821.8	-0.45573	-0.4672	1.23706e-05	0.000291189
SP140L	825.3	0.61539	0.64544	1.25958e-05	0.000296031
ATL3	3714.1	0.44001	0.45059	1.31023e-05	0.000307459
BTG1	2949.6	0.43829	0.44892	1.35177e-05	0.000316718
SNAI1	494.1	-0.59902	-0.62557	1.40833e-05	0.000329463
LBR	869.7	0.50239	0.51846	1.44323e-05	0.000337107
RP11-693N9.2	23.9	1.39987	2.21988	1.45135e-05	0.000338485
TMEM159	579.2	0.5815	0.60764	1.47496e-05	0.000343465
CYLD	2677.7	0.48652	0.50153	1.52837e-05	0.000355358
ZNF526	612.8	-0.70651	-0.75674	1.53209e-05	0.000355678
ENDOD1	600.7	0.67297	0.71377	1.56824e-05	0.000363516
FAM76B	231.7	0.71162	0.76076	1.5768e-05	0.000364944
FAM189B	1526.9	0.3977	0.40561	1.59166e-05	0.000367824
CDKN2D	98.5	1.01879	1.17423	1.59748e-05	0.000368607
H1F0	3391.6	-0.44166	-0.45275	1.63418e-05	0.000376506
N4BP2L1	42.7	1.35525	1.97559	1.65804e-05	0.000381424
LMO4	2865.7	0.40649	0.41498	1.7078e-05	0.000392278
DDX52	1481.1	0.57268	0.59769	1.7138e-05	0.000393062
MAPK7	1064.4	-0.52983	-0.54968	1.7311e-05	0.000396432
SEMA4D	41.6	1.22313	1.57588	1.78685e-05	0.000408584
C7orf49	1079.9	-0.55663	-0.57992	1.80297e-05	0.00041165
SCARB2	16423.2	0.46468	0.47772	1.81903e-05	0.000414694
SRSF5	2464.9	-0.39112	-0.39879	1.86187e-05	0.000423827
LRRC3	65.1	1.11374	1.35355	1.88198e-05	0.000427763
ADAMTS15	835.5	-0.78109	-0.84992	1.9142e-05	0.000434438
STK17B	830.2	-0.53705	-0.55803	1.92466e-05	0.000436161
MARCH5	1595.6	0.51655	0.53493	1.94428e-05	0.000439341
CBR1	2698	0.35981	0.36577	1.94447e-05	0.000439341
DDX3X	10466.9	0.51213	0.52993	1.94786e-05	0.000439453
OSGIN2	862.9	0.53615	0.55713	1.97589e-05	0.000445117
CIITA	13.3	1.36781	2.90812	2.0209e-05	0.000454582
SLC12A6	1074.8	0.43311	0.44368	2.18838e-05	0.000491529
ACOT2	354.7	0.55721	0.57995	2.19537e-05	0.000492371
HLA-B	20560.9	0.39424	0.40222	2.24485e-05	0.000502728
BHLHE40	1617.8	-0.55649	-0.57976	2.37794e-05	0.000531748
SKIDA1	66.8	1.22305	1.63853	2.38295e-05	0.000532088
ZFP69B	142	-0.81539	-0.90323	2.47023e-05	0.000550767
TSPYL2	873.8	-0.50908	-0.52712	2.49783e-05	0.000555717
UBTF	3388.6	-0.35437	-0.35981	2.49974e-05	0.000555717
SLC25A30	365.6	0.71427	0.76591	2.51661e-05	0.00055865
LFNG	112.2	-0.96382	-1.10843	2.52372e-05	0.000558737
KCTD11	1088.5	-0.44173	-0.45309	2.52435e-05	0.000558737
TMEM219	1932.9	0.46465	0.47809	2.57834e-05	0.000569621
RPS27AP16	281.3	-0.72374	-0.78452	2.58101e-05	0.000569621
PCNA	2228	0.46752	0.48148	2.62065e-05	0.00057753
AZI2	2325.4	0.41297	0.42237	2.64678e-05	0.000582446
FGF2	19955.5	1.00357	1.18487	2.66006e-05	0.000584522
AKAP8L	906.6	0.51739	0.53649	2.71408e-05	0.00059553
VANGL1	1216.3	0.42756	0.43805	2.73099e-05	0.000598379
ARL8B	3266.7	0.38587	0.39357	2.75184e-05	0.000601846
TRIM65	563.3	-0.62559	-0.66223	2.75473e-05	0.000601846
CD47	2658.7	0.41059	0.41992	2.78623e-05	0.000607853
TMEM63B	1688.7	0.41168	0.42111	2.79835e-05	0.000609624
ID4	400.1	-0.70587	-0.75501	2.83286e-05	0.000616258
KRT34	810.2	0.45356	0.46644	2.91364e-05	0.000632926
PITX2	300.4	-0.69768	-0.74444	3.08795e-05	0.000669833
CES2	2459.8	0.34774	0.3534	3.10352e-05	0.000672252
WARS	18520.7	1.03723	1.23518	3.13083e-05	0.000677204
RPS7P1	144.4	-0.93862	-1.10866	3.18955e-05	0.000688924
KLHL29	917.3	0.48677	0.50279	3.1973e-05	0.000689618
PDE4B	532.7	-0.54059	-0.56269	3.23386e-05	0.000696517
COA7	1166.6	-0.42467	-0.43565	3.30163e-05	0.000710108
FAM212A	88.3	0.98375	1.15176	3.32593e-05	0.000714324
HEXIM1	1113.9	-0.47946	-0.49454	3.41785e-05	0.000732831
STAMBPL1	469.7	0.64167	0.68001	3.42174e-05	0.000732831
TEAD2	1133.5	0.4003	0.40906	3.44409e-05	0.00073658
DIP2B	2183.6	0.52407	0.54455	3.58792e-05	0.000766262
IL7R	2750.4	0.42698	0.43796	3.68795e-05	0.000786521
PGF	604.5	0.61614	0.65147	3.71192e-05	0.000790525
STX11	51.1	1.25738	1.72777	3.77797e-05	0.000803465
PSMB8-AS1	78.8	0.94941	1.09254	3.9565e-05	0.000840258
UBL4A	1008	-0.45605	-0.46963	4.01163e-05	0.000850778
ZNF229	607.1	-0.47031	-0.48579	4.08112e-05	0.000864312
SLC18B1	312.9	0.64637	0.68652	4.43333e-05	0.000937598
ADAMTS1	9969.6	-0.89025	-1.01855	4.45435e-05	0.000940734
NFAT5	2163.9	0.45197	0.4652	4.47987e-05	0.000944811
TOR1AIP1	3028.1	0.49585	0.51359	4.52863e-05	0.000953474
ZNF3	708.2	-0.47277	-0.4881	4.53348e-05	0.000953474
COBLL1	1257.8	0.53335	0.55628	4.54421e-05	0.00095441
USP6NL	638.5	0.48511	0.5022	4.66394e-05	0.000978206
S1PR2	830.5	0.52617	0.54833	4.68625e-05	0.00098153
HPS3	980.2	0.44986	0.46308	4.71197e-05	0.000985561
TLK2	772.3	0.54973	0.57433	4.82466e-05	0.00100774
CAMK2D	3285.9	0.3664	0.37343	4.9034e-05	0.00102279
AC007969.5	184.5	-0.81599	-0.91535	4.96375e-05	0.00103396
TMEM51	106.6	0.97437	1.14731	5.04331e-05	0.00104909
RP11-326I11.5	12.3	1.34094	2.88958	5.09942e-05	0.00105931
RHOBTB2	633.9	-0.46381	-0.47791	5.21902e-05	0.00108268
UTP23	541.8	-0.50436	-0.52541	5.32039e-05	0.0011022
ZNF436	551.7	-0.53236	-0.55429	5.35326e-05	0.00110751
FAM107A	21.4	1.32418	2.02096	5.50542e-05	0.00113744
NCOA2	1358.1	0.48176	0.49831	5.57749e-05	0.00115076
CD7	20.4	1.33862	2.64936	5.67521e-05	0.00116934
KAZN	827.8	0.59338	0.62604	5.70395e-05	0.00117367
SPAG9	5189.4	0.49935	0.51821	5.84781e-05	0.00120165
GSPT2	427.5	-0.51231	-0.53321	6.04046e-05	0.00123856
PRSS23	18779.1	0.49509	0.51325	6.04376e-05	0.00123856
TBC1D9	1676.8	0.45516	0.46935	6.17288e-05	0.00126269
DYNC1H1	19758.2	0.46534	0.48047	6.1781e-05	0.00126269
TLR4	225.4	0.7276	0.78918	6.27395e-05	0.00128056
MIR503HG	675.1	-0.54937	-0.57176	6.36131e-05	0.00129665
POLR1C	610.9	-0.51389	-0.53539	6.41668e-05	0.00130619
RPL13P12	332.2	-0.70498	-0.76553	6.67625e-05	0.00135721
AHR	970.6	-0.56364	-0.59378	6.87844e-05	0.00139644
MYO1E	2573.2	0.53249	0.55591	6.92149e-05	0.00140331
RFX5	1068.1	0.43348	0.44572	7.00574e-05	0.0014185
NTF3	313.6	0.58724	0.61906	7.02297e-05	0.0014201
RANBP6	727.6	-0.51766	-0.54028	7.10803e-05	0.00143539
GZF1	802	-0.44619	-0.46021	7.12707e-05	0.00143565
DGKH	769.3	0.5381	0.56282	7.12822e-05	0.00143565
CARD6	242.8	0.68174	0.73437	7.54299e-05	0.00151718
GLUL	2914.9	0.40615	0.41626	7.65851e-05	0.00153838
IFITM2	6584.9	0.37786	0.38592	7.72133e-05	0.00154895
CSTF3	942	0.54731	0.57344	7.94176e-05	0.00159107
RHBDF2	451.8	0.59964	0.63441	7.98439e-05	0.00159751
HTATIP2	1125.3	0.43764	0.45067	8.00772e-05	0.00160007
NRSN2-AS1	60.9	1.01001	1.22936	8.03902e-05	0.00160422
PHF11	813.4	0.44411	0.45761	8.2217e-05	0.00163852
BRF2	439.8	-0.61218	-0.64931	8.39237e-05	0.00167035
JRK	683.3	-0.57532	-0.6062	8.58524e-05	0.0017065
NRBF2	988.9	-0.39594	-0.40579	8.65899e-05	0.00171891
ADAM17	2455.4	0.42124	0.43285	8.72196e-05	0.00172915
ZBTB14	340.7	-0.55375	-0.58269	8.74335e-05	0.00173114
GCA	52	1.12666	1.4777	8.9254e-05	0.00176488
GTF3C4	1694.9	-0.42162	-0.43354	8.98707e-05	0.00177477
MAT2A	6875.2	-0.31587	-0.32062	9.11089e-05	0.00179689
BCOR	635.3	-0.49	-0.50814	9.23947e-05	0.00181989
ELP5	747.6	-0.41927	-0.43018	9.2794e-05	0.00182387
SLC44A1	2596.9	0.41755	0.42883	9.28367e-05	0.00182387
TFAP2A	764.7	0.47239	0.48926	9.37308e-05	0.00183906
MED22	1026.7	-0.42489	-0.4365	9.45268e-05	0.00185229
HILPDA	179.8	-0.78221	-0.87395	9.58047e-05	0.00187491
AEN	3071.9	0.33447	0.34023	9.59583e-05	0.0018755
BCL9L	5416.1	-0.46131	-0.477	9.63473e-05	0.00188069
CASS4	93.3	-0.97346	-1.17845	9.67106e-05	0.00188536
PRRG1	536.5	0.55814	0.58588	9.74578e-05	0.00189749
TRAPPC3L	9.8	1.26997	2.98522	9.77672e-05	0.00190108
UBE2Z	5775.9	0.39474	0.40433	9.82394e-05	0.00190726
MEPCE	1128.6	-0.43898	-0.45239	9.83354e-05	0.00190726
EREG	147.1	0.84524	0.97937	0.00010079	0.00194956
CDKN2C	482.4	0.58694	0.61997	0.000100887	0.00194956
RUSC1	814.9	0.42534	0.43735	0.000100901	0.00194956
CAMK2N1	3457.1	0.41575	0.42719	0.000101506	0.00195875
EPHA4	902.5	0.53489	0.56028	0.000103395	0.00199269
PARP4	1756.3	0.43995	0.45356	0.00010731	0.00206552
RP1-193H18.2	15	1.28618	2.13773	0.000107933	0.00207344
C19orf48	586.8	-0.47681	-0.49295	0.000107995	0.00207344
ZEB2	4167.8	0.37094	0.37896	0.000108393	0.00207757
RP1-152L7.5	183.6	-0.7178	-0.77616	0.000108483	0.00207757
SETD1B	1720.3	0.40478	0.41531	0.000110408	0.00211179
TSPYL5	759.9	-0.43514	-0.44762	0.00011345	0.00216723
JRKL	555.3	-0.46273	-0.47922	0.000115032	0.00219469
ZNF587B	175.5	-0.70446	-0.76715	0.000115575	0.0022023
KANSL1L	253.1	0.75752	0.83559	0.000116657	0.00222014
LIMA1	7988.2	0.42429	0.43657	0.00012212	0.00232119
AFF4	6493.4	0.54248	0.56987	0.000122507	0.00232564
RBM12	1860.1	-0.39248	-0.40242	0.000123789	0.00234705
USP43	56.2	1.01779	1.24037	0.000127211	0.00240893
RRS1	687.7	-0.51481	-0.5385	0.00012747	0.00240921
RNF168	543.8	-0.49511	-0.51499	0.000127679	0.00240921
DZIP1L	367.3	0.55643	0.58482	0.000127701	0.00240921
SUSD6	1617.4	0.37926	0.38817	0.000136179	0.00256597
SAT1	1708.2	0.44371	0.45856	0.000139941	0.0026336
RUNX3	22.5	1.25589	2.07262	0.000144515	0.00271632
ANKIB1	3544	0.43578	0.44953	0.000145089	0.00272373
EHD1	4992.7	-0.35926	-0.36675	0.000148416	0.00278275
ZNF268	631.6	-0.42792	-0.44183	0.000149159	0.00279323
PHF13	746.6	-0.51897	-0.54354	0.000151364	0.00283105
IFFO2	671.6	-0.4657	-0.48454	0.000152013	0.00283969
MICA	1128.8	0.41808	0.43028	0.000153498	0.00286391
VAMP5	1246.2	0.41458	0.42636	0.000153996	0.00286969
ZFAND5	5195.1	-0.3818	-0.39143	0.000156986	0.00292182
NRG1	2258.8	0.50644	0.52889	0.000157478	0.00292739
PHC2	4679.4	-0.31714	-0.32251	0.000158016	0.0029338
IPPK	457.2	-0.46605	-0.48308	0.000161584	0.0029964
CTD-2095E4.5	13.5	1.25212	2.51332	0.000162987	0.00301874
BET1L	2432.7	-0.38094	-0.39023	0.000163364	0.00302203
PKDCC	243.4	0.60032	0.63791	0.000164056	0.00303115
SMIM14	1834.8	0.42107	0.4337	0.000170764	0.0031476
XPR1	2052.6	0.39896	0.40977	0.000170773	0.0031476
SLC30A4	518.9	0.56729	0.59992	0.000171159	0.00315091
VEZF1	1262.3	0.50133	0.52335	0.000173533	0.00318843
CDC25B	2494.2	0.33267	0.33877	0.000173617	0.00318843
SEMA7A	10868.2	-0.30648	-0.31126	0.000175566	0.00322033
CPT1A	1822.7	0.47783	0.49683	0.000176896	0.00324081
F2RL2	1200.9	0.44317	0.45851	0.000179924	0.00329232
C5orf15	2113.5	0.42633	0.43967	0.000181652	0.00331994
KCNS3	418.9	0.51631	0.54137	0.000181929	0.00332102
XBP1	7784.4	0.44397	0.459	0.000183056	0.00333758
ZNF629	1502.1	-0.39457	-0.40513	0.000184679	0.00336314
RBM47	74.5	0.98748	1.21585	0.000186593	0.00339393
FHL3	1555.8	0.35709	0.36472	0.000188567	0.00342568
ARL4A	203.4	-0.66988	-0.72969	0.000188789	0.00342568
RIPK1	2722.1	0.91773	1.09538	0.00019004	0.00344428
LCMT2	394.7	-0.51943	-0.54461	0.000194152	0.00351462
RP1-228H13.5	124.4	-0.78963	-0.90443	0.00019654	0.00355361
RP3-508I15.19	16	1.23421	2.19626	0.000198887	0.00359178
ZNF217	1720.3	0.39457	0.4052	0.000202907	0.00366002
ODC1	3530	-0.30556	-0.31021	0.000207868	0.00374507
AC084219.4	215.5	-0.70437	-0.78438	0.00020848	0.00375165
MAP4K5	3213.5	0.42615	0.43987	0.000213679	0.00383691
RPS19P3	567.2	-0.73073	-0.81481	0.000213722	0.00383691
FHOD1	645.4	-0.53373	-0.5615	0.000214676	0.00384949
ZBTB21	1009.7	-0.45538	-0.47364	0.000219833	0.00393731
C17orf107	242.2	-0.64631	-0.69757	0.000221183	0.00395683
WTAP	2187.2	0.39092	0.40138	0.000222532	0.00397629
SATB1	405.2	0.57563	0.61311	0.000225803	0.00403
KCNS2	70.5	-0.97515	-1.21528	0.000231864	0.00413332
ZBTB1	984.6	-0.36806	-0.37731	0.000232167	0.00413387
ZNF671	217.7	-0.61435	-0.65922	0.000232989	0.00414366
MTHFR	1293.3	0.35087	0.35837	0.000233305	0.00414443
NUP62	1721.1	0.45534	0.47219	0.000234306	0.00415645
PATZ1	540.8	-0.47917	-0.4983	0.000234528	0.00415645
CLDN14	99	1.05858	1.40365	0.000236404	0.00417909
SRSF6	4604.1	-0.29753	-0.30215	0.000236419	0.00417909
TNFRSF10D	2530.8	0.39914	0.41066	0.00023663	0.00417909
ZNF550	243.9	-0.61265	-0.65686	0.000239648	0.00422748
TMTC1	5836	0.33382	0.34032	0.000241496	0.00425514
EPHB3	411.1	-0.55887	-0.58937	0.000244701	0.00430663
POGK	1806.6	-0.32866	-0.33519	0.000246121	0.00432662
FZD8	829.7	-0.50367	-0.52694	0.000246773	0.00433306
INTS12	734.7	0.50891	0.53315	0.000248577	0.00435971
HSCB	384.2	0.56273	0.59598	0.000252201	0.00441817
CDC14B	1426	0.39483	0.40586	0.000253187	0.00443034
PAPD4	1723.8	0.41123	0.42375	0.000256038	0.00447508
RAB29	1155.9	0.43851	0.45385	0.000260787	0.00455285
ZNF134	864.9	-0.37245	-0.38161	0.000262593	0.00457912
PSMA3	2468.2	0.48322	0.50396	0.000263723	0.00459355
ZNF615	252.1	-0.57078	-0.60749	0.000266254	0.00463233
CHMP5	1740.8	0.3928	0.40367	0.000269618	0.00468549
EPM2AIP1	797.7	-0.43895	-0.4548	0.000271626	0.004715
MEF2D	2235.6	-0.4092	-0.42181	0.000274969	0.00476759
USP22	7679	-0.26741	-0.27077	0.000277385	0.0048002
NAMPTP1	165	0.83398	0.96955	0.000277481	0.0048002
RNF113A	295	-0.5682	-0.60672	0.000277886	0.00480174
ID2	4125	-0.44149	-0.45758	0.000279566	0.00482529
KANK2	6512.1	-0.28852	-0.29274	0.000281814	0.00485857
AAED1	565	0.54795	0.57947	0.000282557	0.00486586
ZBTB33	612.8	0.53214	0.56087	0.000285243	0.00490657
RXFP1	153.8	0.81044	0.93044	0.000288173	0.00495136
MYCT1	14.2	1.20443	2.31916	0.000288662	0.00495418
ABHD12	1940.4	0.34654	0.35404	0.000289742	0.0049671
PMP22	3963.5	0.44354	0.45961	0.000291406	0.00499
NFYA	984	-0.38595	-0.39601	0.00029524	0.00504996
ATP10D	2986	0.4177	0.4311	0.000296339	0.00506307
MIR22HG	3850.2	-0.31289	-0.31827	0.000297687	0.00507934
ENY2	1477.7	0.40486	0.41699	0.00029796	0.00507934
ARID4A	532.4	-0.4674	-0.48731	0.000300812	0.00512223
PABPC4L	150.5	-0.71701	-0.79296	0.000307459	0.00522955
CTNNBL1	1075.8	0.51659	0.54277	0.000308971	0.00524479
RGS3	1741.8	0.51262	0.53869	0.000309044	0.00524479
C10orf10	26.8	1.14959	1.5696	0.000310666	0.00526643
MCUB	424.7	0.52805	0.55567	0.000311711	0.00527826
CPED1	1535.5	0.39377	0.40507	0.000312695	0.00528903
CARD16	109.5	0.76426	0.85865	0.00031645	0.00534659
SFT2D3	336	-0.53091	-0.56192	0.000328419	0.00554266
NCOA3	3161.9	0.37646	0.38633	0.000329368	0.00555251
PELO	1763.4	0.44014	0.45629	0.000330335	0.00556265
POR	1871.8	0.32799	0.33442	0.000330738	0.00556327
IPMK	186.8	0.6524	0.71247	0.000333896	0.00561019
ADGRL4	1258.3	0.37222	0.38178	0.000335787	0.00563573
KBTBD7	122.8	-0.73819	-0.82898	0.000336599	0.00564314
MR1	1538	0.33345	0.34024	0.000339278	0.00568179
NUAK1	1002.4	-0.40148	-0.41315	0.000340288	0.00569243
MRGBP	647.3	0.40004	0.41196	0.000342312	0.00571999
MID2	581.2	0.62267	0.67099	0.000342759	0.00572118
COL4A3BP	1214.7	0.38432	0.39495	0.000349404	0.00582569
BAHD1	770	-0.42398	-0.4381	0.000350041	0.00582993
CISD1	531.7	0.49726	0.52124	0.000350682	0.00583421
DLC1	6485.7	-0.42594	-0.44068	0.000353456	0.00587393
EIF1AD	811.5	-0.45629	-0.47518	0.00035975	0.005972
CASP4	3359	0.37284	0.38254	0.000366935	0.00608464
TCEA1	1669.8	0.39919	0.41124	0.00036812	0.00609763
KCNK6	1538.4	-0.43684	-0.45352	0.000369067	0.00610667
PP7080	228.2	-0.58978	-0.6285	0.00037578	0.00621099
RSBN1L	617.4	0.48586	0.50812	0.000383882	0.00633801
BTG3	974.1	0.53695	0.56783	0.000388146	0.00640147
CSNK1G1	1283.8	0.52421	0.55314	0.000388731	0.00640417
KCTD21	953.4	-0.45267	-0.47155	0.000390436	0.0064253
MAST4	1173.3	0.3957	0.40756	0.000391939	0.00644306
LRCH1	886.1	0.44918	0.46684	0.00039328	0.00645812
ADAMTS5	652	-0.653	-0.71682	0.000397578	0.00652166
TSPAN5	3910.9	0.3271	0.33367	0.000400186	0.00655736
CHPT1	1078	0.37321	0.38311	0.000401981	0.00657926
CUEDC1	2179.2	0.28952	0.29402	0.000402388	0.00657926
SLC31A2	511.3	0.54088	0.57378	0.000409721	0.00669062
MAFG	2313.2	0.33077	0.3376	0.000410407	0.00669062
HOMER1	432.4	0.64671	0.70476	0.000410519	0.00669062
NFIX	7668.9	0.30432	0.30961	0.000414927	0.00675523
DNMT3B	121	0.71748	0.79616	0.000419493	0.00682226
SIAH2	1363.2	0.48142	0.50322	0.00042306	0.00687291
RFTN2	154.5	0.74287	0.83622	0.000428398	0.0069522
ADGRL2	1240.4	0.39203	0.40374	0.000428977	0.00695419
DEDD	1558.2	0.38018	0.39073	0.000431943	0.00699044
ZFP37	124.8	-0.71119	-0.79724	0.000432133	0.00699044
SNX2	2340.4	0.40452	0.41747	0.000435342	0.00703487
MARVELD3	9.5	1.13657	2.08258	0.000437167	0.00705686
DDIT4	5570.4	-0.77819	-0.89242	0.000440146	0.00709742
SLC37A3	1877.9	0.41044	0.42396	0.000446821	0.00719741
RIPK4	136	-0.91902	-1.17615	0.00044831	0.00721376
AGTRAP	1036.5	0.34626	0.3542	0.000449289	0.00722186
ZNF641	678.6	0.40469	0.41758	0.000451515	0.00724998
EEF1A1P1	220.5	0.5912	0.63479	0.000460472	0.00738601
PAQR7	587.1	-0.41683	-0.43079	0.000470187	0.0075339
TTLL4	585.2	-0.42659	-0.4421	0.000476459	0.00762635
BCL2L11	172.6	0.73877	0.83329	0.000476974	0.00762656
RP11-832N8.1	191.9	-0.74531	-0.84872	0.000481017	0.00768313
TM9SF2	6796.6	0.33912	0.34669	0.000482527	0.00769917
CGGBP1	2885.5	0.31554	0.3216	0.000486736	0.00775818
CNST	2114.5	0.34159	0.34937	0.000499579	0.0079501
CEP68	579.3	-0.45154	-0.47009	0.000499822	0.0079501
LIPA	6445.4	0.47784	0.50006	0.000507053	0.00805668
KDM6A	990.7	0.58875	0.63232	0.000509266	0.00808341
NAGK	1847.4	0.35086	0.35932	0.000513748	0.00814604
IQCJ-SCHIP1	231.3	0.58309	0.62623	0.000515178	0.00815279
AUTS2	335	0.65493	0.71568	0.000515424	0.00815279
FAM109B	1313.7	-0.42216	-0.4373	0.000515782	0.00815279
CDKN2AIP	472.9	-0.42875	-0.4447	0.000525713	0.00830113
B3GNT8	47.5	0.98083	1.24434	0.000526294	0.00830169
CD276	9657	0.28676	0.29134	0.000527818	0.0083171
AKIRIN2	1460.8	0.33572	0.34316	0.000530117	0.00834468
TET1	123.8	-0.74666	-0.83602	0.000531405	0.0083563
PPM1D	824.1	0.39956	0.41258	0.000533653	0.00838299
KDM6B	1281.6	-0.41972	-0.43573	0.000539341	0.00846358
ARHGAP21	4454.5	0.38115	0.39221	0.000541683	0.00849157
TMEM60	482.9	0.52892	0.56077	0.000545008	0.00853491
ABHD10	709.7	-0.42478	-0.44042	0.000567406	0.00887652
MIIP	365.7	0.47138	0.49272	0.000569959	0.00890729
CDH8	17.5	1.14543	2.61867	0.00057067	0.00890925
C8orf58	452.3	-0.55601	-0.5932	0.000577352	0.00900433
HOXD10	229.3	0.56895	0.60948	0.000590305	0.00918841
RNF216P1	645.2	-0.40593	-0.41999	0.000590364	0.00918841
CASP10	53.4	0.90539	1.093	0.000591078	0.00919011
CCDC51	310.7	-0.51321	-0.5428	0.00059197	0.00919458
NEMP1	542.6	0.53254	0.56537	0.000603609	0.00936579
CARD10	221.3	-0.59032	-0.63976	0.000607275	0.00941307
FAM175A	343.1	0.57719	0.61964	0.00060913	0.00943221
CCDC71	822.5	-0.38506	-0.39726	0.000611184	0.0094544
CCL26	11.5	1.13213	2.69014	0.000612626	0.00946707
RBM24	158.3	-0.66897	-0.74721	0.000615216	0.00949744
NPC1	6823.5	0.30505	0.31073	0.000617733	0.00952662
PLEKHO1	2038.8	0.39422	0.40676	0.000618704	0.00953192
B2M	53006.9	0.37525	0.38601	0.000621361	0.00956317
EBF3	266.5	0.5896	0.63508	0.000627456	0.00964722
FAM198B	2198.8	0.31167	0.31774	0.000628836	0.00965867
DYNLL2	2837.9	-0.31487	-0.3213	0.000631055	0.00968296
CRCP	878	-0.36736	-0.37761	0.000644357	0.00987711
CLPX	1166.7	-0.32694	-0.33405	0.000648483	0.00993035
LRRC8A	5748.2	-0.27564	-0.27993	0.000652613	0.00998353
STX12	2593.2	0.38488	0.39667	0.000655719	0.010021
GLI3	1047.4	0.42826	0.44475	0.000659526	0.010069
RP11-511P7.6	59.3	0.85707	1.00973	0.000662076	0.0100978
ATP6V1B2	4726.5	0.3012	0.30673	0.000669819	0.0102057
ZNF16	325.1	-0.50062	-0.52788	0.000674119	0.0102609
SPTY2D1	1501.5	-0.36918	-0.38027	0.000684214	0.0104042
DSEL	4641.9	-0.42627	-0.44305	0.000685446	0.0104125
GATA2	781.7	-0.44139	-0.45957	0.000690958	0.0104857
HOXA11	686.5	-0.44646	-0.46544	0.000711592	0.0107881
ARF6	4048.9	0.29215	0.29724	0.000715286	0.0108333
PLSCR4	1243.3	0.38348	0.39536	0.000717791	0.0108604
PHF12	1276.1	-0.40955	-0.42427	0.000718507	0.0108605
PRR15	105.6	0.76094	0.86575	0.000721422	0.0108937
FLRT3	191.7	-0.62129	-0.68178	0.000731742	0.0110386
MAT2B	1647.4	0.37521	0.38613	0.000734266	0.0110657
TBX2	1545.4	-0.35049	-0.35943	0.00073978	0.0111377
RND3	17393.5	0.41608	0.43166	0.000741889	0.0111584
LRCH2	316.9	0.62676	0.6858	0.00074599	0.011209
HINT3	617.3	0.45692	0.47778	0.000748969	0.0112427
PAXIP1-AS2	152.7	0.6191	0.67233	0.000750963	0.0112615
ZNF584	467.6	-0.49037	-0.51868	0.000752154	0.0112682
SNRK	756.9	0.43303	0.45037	0.000756003	0.0113147
ZNF561	1343.8	-0.37127	-0.38231	0.000758347	0.0113387
INAFM2	933.7	-0.37069	-0.38313	0.000759947	0.0113514
RPL26P6	213.4	-0.71358	-0.81176	0.000769549	0.0114836
CAMKK1	326.8	-0.5203	-0.55245	0.000772295	0.0115132
RNF19A	1264.3	0.38834	0.40088	0.000785754	0.0117024
EFNB2	1030.4	-0.37942	-0.39059	0.000789251	0.011743
LINC01914	8.1	1.08772	2.36014	0.000791017	0.0117578
POLA2	269.8	0.60586	0.6557	0.00079787	0.0118481
WDR89	266.9	-0.56743	-0.61251	0.000807479	0.0119791
SYNPO2	2950.1	-0.4598	-0.48055	0.000808711	0.0119856
SNX6	3757.6	0.32972	0.33728	0.000815922	0.0120807
INHBB	844.3	-0.3575	-0.36577	0.000821592	0.0121529
POP1	547.8	-0.46453	-0.4875	0.000831123	0.0122819
TSC22D3	1048	-0.39666	-0.40918	0.000832066	0.0122839
TEK	375.2	0.52701	0.56042	0.000843178	0.0124358
RP11-124N14.3	55.8	1.01756	1.37697	0.000844746	0.0124469
CCNYL1	864.2	0.43867	0.45719	0.00084585	0.0124511
BIRC2	2784.8	0.37715	0.38869	0.000848169	0.0124732
WDR3	1496.1	-0.33632	-0.34449	0.000854616	0.0125558
RP11-517I3.2	253	0.6729	0.75388	0.000858821	0.0126054
FST	7757	0.42779	0.44532	0.000865018	0.0126728
TRAM2	12881.4	-0.27074	-0.27491	0.000865079	0.0126728
TADA1	182.2	-0.6346	-0.70081	0.000869826	0.0127301
AMBRA1	964.2	0.40303	0.41733	0.000875522	0.0128011
LAMP1	20496.9	0.21824	0.2204	0.000877797	0.0128221
DCLRE1B	163	-0.58393	-0.62584	0.000881823	0.0128685
MSTO1	305.5	-0.51766	-0.54953	0.000886658	0.0129267
GLIS2	3037.1	-0.31201	-0.31865	0.000888644	0.0129432
PNN	1592.8	-0.33541	-0.34358	0.000889961	0.01295
KCNQ5	874.4	0.44599	0.46586	0.000892397	0.012973
SNX27	998	0.50613	0.53577	0.000895809	0.0130102
ZNF649	200.5	-0.55873	-0.59834	0.00092095	0.0133626
SFT2D2	1234.3	0.42689	0.44409	0.000936639	0.0135773
ZNF778	314.8	-0.4989	-0.52949	0.000939607	0.0136073
KLF16	716.8	-0.45617	-0.47887	0.00094707	0.0137023
TNFRSF8	24.1	1.03739	1.42492	0.000958492	0.0138544
CTDSP2	10150	0.2813	0.28608	0.000967817	0.0139759
SEMA4C	891.7	-0.45376	-0.47583	0.000970813	0.0140059
MAMLD1	1179.7	-0.3885	-0.40403	0.000973057	0.0140249
STK3	595.2	0.45889	0.481	0.000975372	0.014045
LRIG3	1752.9	0.36031	0.37058	0.000981597	0.0141212
DNPEP	1541.9	0.39318	0.40671	0.000992601	0.0142661
HLA-A	17329.9	0.2653	0.26931	0.000998814	0.0143418
RIOK2	1233.7	-0.37042	-0.38164	0.00100499	0.0144169
GPCPD1	1175.7	-0.40799	-0.42306	0.00101684	0.0145658
LARP6	3405.1	0.29334	0.29882	0.00101729	0.0145658
SH3GLB1	5583	0.39742	0.41158	0.00102387	0.0146462
RAPGEF2	2310.8	0.38056	0.39297	0.00104565	0.0149437
CCDC137	684.4	-0.38891	-0.40172	0.00105475	0.0150596
C4orf33	122.2	0.63807	0.7023	0.00106088	0.0151329
KLF2	360.4	0.66176	0.73423	0.0010619	0.0151333
ESCO1	531.4	-0.39439	-0.40948	0.00106788	0.0152043
METTL12	195.3	-0.6346	-0.70143	0.00107918	0.0153508
BORCS6	183.3	-0.63326	-0.69578	0.00108172	0.0153725
HMG20A	1121.7	-0.33749	-0.34583	0.00109282	0.0155157
ANGEL2	752.7	0.3737	0.38538	0.00109933	0.0155936
CALCOCO2	3265.3	0.34259	0.35157	0.00110276	0.0156277
PPP3CC	997	0.52091	0.55547	0.00110783	0.015685
KDM3A	1277.8	-0.32693	-0.33525	0.00114331	0.0161723
ZNF224	494.2	0.5543	0.59598	0.00114495	0.0161805
PPIL1	1285.2	-0.30551	-0.31158	0.00115181	0.0162623
RBPJ	2808.6	0.40514	0.42051	0.0011568	0.0163049
GVINP1	16.8	1.07838	1.89119	0.00115725	0.0163049
ZNF616	405.8	-0.5144	-0.54904	0.00115805	0.0163049
CCDC186	844.9	-0.38084	-0.39462	0.0011604	0.0163229
CELF2	548.5	0.48984	0.52139	0.00116931	0.016433
SMAD4	1556.8	0.35246	0.36241	0.00118726	0.0166562
SIGIRR	227.9	0.54936	0.58952	0.00118738	0.0166562
ZKSCAN7	187	-0.60772	-0.66431	0.00120965	0.0169529
FBXO32	1153.3	0.99061	1.44725	0.0012202	0.017085
TRIM32	1682.8	-0.36148	-0.37262	0.00122273	0.0171048
NEU3	454.4	-0.4979	-0.52779	0.00123003	0.0171911
ANKZF1	459.5	-0.44482	-0.46633	0.00123874	0.0172968
WEE1	986.8	-0.45308	-0.47509	0.00123999	0.0172985
NOP56	2353.3	-0.34117	-0.35026	0.00124644	0.0173724
TNKS2	4483.6	0.36084	0.37177	0.00127946	0.0178164
MTA2	3127.9	-0.27469	-0.27923	0.00130346	0.0181339
RHOB	4167.4	-0.48851	-0.51659	0.00132353	0.0183964
SHROOM4	82.1	0.88189	1.12815	0.00133379	0.0185221
ERF	1402.7	-0.37211	-0.38499	0.00133764	0.0185586
MMAA	367	0.48796	0.51665	0.00134555	0.0186512
ANKRD50	1593.7	-0.33423	-0.34287	0.00136314	0.0188778
DEDD2	711.1	-0.43923	-0.46102	0.00136568	0.0188959
KLF14	45.2	0.91333	1.18319	0.00137372	0.0189898
LRP10	17455.2	0.22763	0.23029	0.00137613	0.0190058
PER2	126.7	-0.686	-0.78144	0.00138808	0.0191534
AP4B1	580.1	-0.41271	-0.42965	0.00139536	0.0192361
CHRNB1	111.1	0.70168	0.79174	0.0013966	0.0192361
PCF11	1562.8	0.35282	0.36311	0.0014096	0.0193977
ZFP1	327.1	-0.46673	-0.49256	0.00141379	0.0194377
TWNK	461.2	-0.44627	-0.46811	0.00142799	0.0196152
ZNF587	476.5	-0.50402	-0.53725	0.00143197	0.0196521
C17orf62	1404.6	0.30608	0.31273	0.00143845	0.0197085
CCNF	206.6	-0.55206	-0.58964	0.00143867	0.0197085
ABTB2	474.7	-0.47851	-0.50811	0.00144133	0.0197237
LNX2	298.6	-0.50255	-0.53325	0.00144264	0.0197237
CTDSPL2	890.9	0.41675	0.43417	0.00144423	0.0197237
PALMD	62.9	-0.83415	-1.0468	0.00144532	0.0197237
TMEM87A	2530.1	0.38475	0.39838	0.00144627	0.0197237
SOX4	1643.6	-0.35012	-0.36062	0.0014483	0.0197337
USP33	2265.5	0.29958	0.30582	0.00145059	0.0197473
STX3	1129.2	0.39983	0.41522	0.00146106	0.019872
SLFN11	1203.5	0.43022	0.44935	0.00146441	0.0198997
NUMBL	1712.2	-0.36263	-0.3739	0.00146792	0.0199296
DNAJC1	1683	0.31567	0.32302	0.00147065	0.0199489
RP11-363E7.4	44.8	0.93894	1.35573	0.00147252	0.0199564
FAM222B	865.9	-0.38332	-0.39747	0.00147791	0.0200116
FRAT2	155.1	-0.69568	-0.79186	0.00148891	0.0201427
RP11-513O13.1	77.9	-0.74535	-0.86945	0.00149175	0.0201631
SLC12A7	339.9	0.44635	0.46815	0.0015233	0.0205714
GRN	20411.1	0.21582	0.21813	0.00153556	0.0207111
SPATA18	2641.3	0.30971	0.31671	0.00153637	0.0207111
PXDC1	3203.5	0.24187	0.24516	0.00153786	0.0207128
CARMN	347.3	-0.68261	-0.76818	0.00154848	0.0208374
YTHDC1	1527.8	0.31025	0.31729	0.00155218	0.0208575
AMOTL2	4808.7	0.41724	0.43499	0.00155272	0.0208575
VCPIP1	913.1	0.45538	0.47907	0.00155928	0.0209271
RASD2	94.6	-0.73292	-0.83223	0.00157357	0.0211003
MRPS6	980.3	0.37941	0.39261	0.00158206	0.0211847
TRIM59	276.6	-0.51691	-0.55031	0.00158266	0.0211847
NFXL1	391.9	-0.43737	-0.45832	0.00159545	0.0213373
OSMR	8469.9	0.32117	0.32908	0.00162911	0.0217683
MIS18BP1	601.4	0.5324	0.57212	0.00163164	0.0217781
SRSF8	851	-0.33699	-0.34646	0.00163271	0.0217781
PGM2L1	715.1	0.47935	0.50761	0.00163564	0.0217957
KNOP1	507.7	-0.38894	-0.40315	0.0016369	0.0217957
TSC22D4	1359.6	0.30971	0.31679	0.0016464	0.0219031
AP5B1	225.5	0.51655	0.55259	0.00165272	0.0219536
FAM26F	18.6	1.02547	1.59172	0.00165309	0.0219536
RNF144B	71	0.90006	1.17928	0.00166422	0.0220821
CBR3-AS1	26.8	0.96163	1.3409	0.00167127	0.0221564
TMEM109	2615.5	0.25981	0.26396	0.00167864	0.0222347
CMYA5	151.5	0.68328	0.78592	0.00171748	0.0227294
FAM167A	860.6	-0.40203	-0.41772	0.00174095	0.0230199
BVES	902.6	0.38553	0.39967	0.00174573	0.0230595
C17orf51	688.1	-0.40069	-0.41689	0.00174698	0.0230595
MN1	1708.2	-0.35055	-0.36069	0.0017684	0.0233135
ZNF518B	1043.6	-0.3313	-0.34062	0.00176928	0.0233135
C4orf3	2987.2	0.26659	0.27113	0.00178031	0.0234384
CYP1B1	5996.9	-0.31862	-0.32638	0.00178249	0.0234468
NFIL3	1889	0.32357	0.33184	0.00178897	0.0235118
PSME1	3149	0.27338	0.27829	0.00179492	0.0235696
ZSCAN2	140.9	-0.60852	-0.66987	0.00179729	0.0235803
PXK	2395.6	0.39689	0.4125	0.00180567	0.0236698
ZNF568	333.3	-0.45773	-0.48379	0.00180943	0.0236987
NKX3-1	116.9	0.73391	0.84882	0.00181388	0.0237365
CTCF	1434.4	-0.30551	-0.31239	0.0018156	0.0237386
ACTR8	1242.6	-0.29229	-0.29842	0.00181926	0.0237661
PSORS1C1	73.9	0.72206	0.82922	0.00185838	0.0242465
METTL7A	223.7	0.5903	0.64544	0.00185923	0.0242465
SNX3	4678.5	0.26568	0.27021	0.00187632	0.0244333
ASAH2B	46.7	0.83777	1.04011	0.00187676	0.0244333
NXT1	489.9	-0.41805	-0.43763	0.0018813	0.0244714
DSTYK	2217.5	-0.2841	-0.28979	0.00188753	0.0245314
MIDN	2416.4	-0.49583	-0.52856	0.00190213	0.0247
STAG2	3031.6	0.3298	0.33868	0.00190605	0.0247298
ARL4D	453.6	-0.41398	-0.43098	0.00190841	0.0247394
EIF2AK3	1379	-0.41708	-0.43639	0.00191368	0.0247753
BROX	979.1	0.41288	0.43058	0.00191444	0.0247753
SIX5	620.9	-0.48012	-0.50991	0.00193295	0.0249935
PSMB10	322.4	0.45564	0.47992	0.00193644	0.0250175
TEC	17.2	1.02819	2.03068	0.00197767	0.0255087
SLC26A11	482.8	0.44158	0.46375	0.00197782	0.0255087
JMJD4	892.6	-0.34403	-0.35414	0.00198276	0.0255469
NUAK2	433.1	0.5815	0.6357	0.00198415	0.0255469
SLC38A6	444.2	0.39894	0.41539	0.00198632	0.0255533
ZFP62	414.3	-0.41389	-0.43288	0.00201942	0.0259572
ARL6IP6	329	0.42376	0.44295	0.00202581	0.0260173
ETS2	895	0.40425	0.42149	0.00204423	0.0262317
C3orf52	231.8	0.58631	0.64587	0.00205019	0.026286
C15orf52	533.5	-0.46819	-0.4963	0.00207184	0.0265412
MLLT6	1990	0.25857	0.26281	0.00207608	0.0265731
DPF2	1515.1	-0.27976	-0.28516	0.0020791	0.0265894
FLCN	1488	0.35568	0.36712	0.00208167	0.0265999
RP11-631N16.2	248.1	-0.50557	-0.54292	0.00208684	0.0266435
PPA1	1762.5	0.33546	0.34499	0.00209291	0.0266986
RAB3GAP1	4530.5	0.26584	0.27049	0.00211851	0.0269905
SAP130	993.2	0.45054	0.47466	0.00211934	0.0269905
ZNF691	169.3	-0.56871	-0.62186	0.00214499	0.0272943
ZNF668	665.4	-0.40019	-0.417	0.00216917	0.0275789
CPA4	1713.4	0.29595	0.30235	0.00217878	0.027678
MORC2	1914.2	-0.27958	-0.28535	0.00220034	0.0279285
EEF2K	899.8	-0.40255	-0.41978	0.00221264	0.0280612
SERTAD1	1391.4	0.34068	0.35077	0.00221768	0.0280906
PLPPR4	1096.4	-0.40312	-0.42062	0.00221997	0.0280906
PRKCD	647.6	0.38713	0.40225	0.0022205	0.0280906
SH3KBP1	2913	0.3166	0.32466	0.00223296	0.0282248
GOLM1	2385.4	0.30119	0.30812	0.00227591	0.0287313
JMJD6	768.6	-0.40525	-0.42344	0.00227697	0.0287313
PPP4R4	89.6	0.72672	0.85329	0.00227871	0.0287313
BMPR1A	751.1	0.40881	0.42697	0.00229128	0.028866
DDB2	1290.2	0.41206	0.4312	0.00229918	0.0289266
SLC7A6OS	514.5	0.36983	0.38292	0.00230034	0.0289266
IRAK1	6384.4	0.29678	0.30343	0.0023018	0.0289266
VASP	4302.9	-0.25415	-0.25826	0.00230906	0.0289939
ASB8	807.2	-0.31284	-0.3209	0.00234267	0.0293916
TMEM65	730.9	0.34074	0.35094	0.00235592	0.0295335
ZNF624	149.3	-0.58669	-0.64836	0.00235911	0.0295491
SPTLC2	4494.7	0.35108	0.36231	0.00239166	0.0298972
VCAM1	10.2	0.99416	1.93128	0.00239547	0.0298972
TANC1	1193.3	0.31305	0.32095	0.00239563	0.0298972
SOS1	1860.5	0.37228	0.38587	0.00239644	0.0298972
SENCR	23.3	0.9873	1.7134	0.00239673	0.0298972
SOCS6	1028.6	-0.35757	-0.36986	0.00245136	0.0305536
MAST3	340.5	-0.42286	-0.44325	0.00247443	0.0308159
ZNF467	30.5	0.92658	1.30919	0.00247763	0.0308305
MYCBP2	3478.5	0.36049	0.37292	0.00251446	0.0312632
LUZP1	3169.8	-0.24423	-0.24798	0.00252011	0.0313003
GPAM	629.5	-0.43592	-0.45727	0.00252156	0.0313003
ZNF623	1071.9	-0.37323	-0.38709	0.0025274	0.0313472
APOD	541.4	0.42081	0.44139	0.00253525	0.0314189
FAM102A	1971.4	-0.26114	-0.26606	0.00254572	0.031523
CD55	2009.7	0.34683	0.35783	0.00255179	0.0315724
ALX3	236.9	-0.5411	-0.58266	0.00255719	0.0316136
RP11-708J19.1	29.4	-0.93449	-1.31566	0.00257312	0.0317728
SLC39A8	438.4	0.41887	0.4381	0.00257528	0.0317728
ZHX1	1499.3	0.3112	0.31908	0.00257634	0.0317728
ATOH8	1759.1	-0.32933	-0.339	0.00257901	0.03178
NLE1	690.7	-0.37736	-0.39159	0.00259259	0.0319076
KDELC2	2206.2	0.3355	0.3454	0.00259357	0.0319076
SCML1	518.4	0.42145	0.44179	0.0026057	0.0319788
TOP1	3949.5	0.32225	0.33106	0.00260577	0.0319788
ZBED8	78.6	-0.74002	-0.89411	0.00260626	0.0319788
ZNF879	117.7	0.62352	0.69721	0.00260776	0.0319788
CHAMP1	1148.1	-0.30788	-0.31598	0.0026177	0.0320747
C1GALT1C1	818	0.37673	0.39106	0.00262458	0.0321331
ADAMTS9	103.9	0.69814	0.805	0.00263437	0.0322271
TXLNA	4369.9	-0.24357	-0.24726	0.00267698	0.0327221
MTMR10	870.5	0.30711	0.31475	0.00268636	0.0328102
TIGD5	377.7	-0.48948	-0.52445	0.00270341	0.0329756
ZNF551	174.7	-0.55313	-0.60907	0.00270423	0.0329756
PCMTD1	940.6	0.43728	0.46042	0.00270791	0.032994
POLR1E	725.7	-0.31885	-0.32701	0.00272632	0.0331917
RIOX2	880	-0.35849	-0.37115	0.00273328	0.0332499
TRIM27	2363	-0.31847	-0.32708	0.00273941	0.0332977
MVK	431	-0.40381	-0.42171	0.00274708	0.0333643
STK32A	55.7	-0.84781	-1.15863	0.00275166	0.0333933
FAM122C	71.6	0.78003	0.94908	0.0027576	0.0334386
H3F3B	8031.7	0.25927	0.26381	0.00277722	0.0336498
KCTD12	725.4	0.37121	0.38494	0.00278377	0.0337023
E2F7	2170.3	-0.30201	-0.31076	0.00278906	0.0337395
CDR2	2390.3	-0.29155	-0.29824	0.00281261	0.0339973
TMEM177	147.6	-0.57287	-0.624	0.0028293	0.0341718
CTC-479C5.12	21.8	0.97411	1.57573	0.00283955	0.0342684
ZKSCAN1	3088.1	-0.32948	-0.33921	0.00284255	0.0342774
ZNF785	273.4	-0.51949	-0.5617	0.00285416	0.0343901
QKI	5212.5	0.30853	0.31639	0.00286093	0.0344377
PRKD1	1682.1	0.3394	0.34991	0.00286264	0.0344377
TSPY26P	205.9	-0.54052	-0.58319	0.00287751	0.0345862
PIK3CA	1574.7	0.33519	0.34537	0.00287953	0.0345862
TMEM123	7119.4	0.27764	0.28333	0.00290851	0.0349067
GREM1	98897.4	0.72798	0.86589	0.00293286	0.0351712
YBX3	5956.3	0.27327	0.27869	0.00294303	0.0352653
HIC2	194.4	-0.51676	-0.56135	0.00297217	0.0355865
SLC46A1	276	-0.48749	-0.52441	0.00298494	0.0357113
ZNF30	78	-0.75456	-0.90725	0.00299665	0.0358232
PLAU	2821.5	-0.46097	-0.48985	0.00300664	0.0359143
BACE2	1054.8	0.36554	0.37903	0.00303031	0.0361592
TCN2	503.9	0.37295	0.38716	0.0030319	0.0361592
RAB30	746.5	-0.46476	-0.49372	0.00304122	0.036242
UBE2D3	6807.5	0.27444	0.27997	0.00304662	0.0362779
ZNF786	142.6	-0.55932	-0.61604	0.0030614	0.0364254
GNAQ	2034.1	0.35156	0.36364	0.00308106	0.0366307
TXNIP	14722.5	0.31664	0.32519	0.00309091	0.0367191
RHOBTB1	804.9	-0.40234	-0.42252	0.00309936	0.0367907
GNG5	1963.9	0.29143	0.29811	0.00310869	0.0368727
FCHSD1	888	-0.30361	-0.31096	0.00311913	0.0369676
RPRD2	1287.6	-0.3076	-0.31558	0.0031383	0.0371659
ZNF132	222.6	-0.55225	-0.60665	0.00315552	0.037321
ZNF329	555.6	-0.33826	-0.3492	0.0031563	0.037321
CHD4	6822.8	-0.2427	-0.24655	0.00319164	0.0377095
RAPH1	2855.3	-0.33298	-0.34358	0.00320325	0.0378013
RNF24	2695.8	0.33689	0.34751	0.00320439	0.0378013
CYFIP2	293.3	0.58131	0.65536	0.00321939	0.0379488
IMP4	1542	-0.30518	-0.31303	0.00323445	0.0380969
ATXN1L	2488.4	0.38015	0.3956	0.00324273	0.0381649
PROCR	837.2	0.46601	0.49531	0.00326074	0.038326
ALKBH5	2648.4	0.26617	0.27129	0.00326342	0.038326
MAD2L1BP	711.2	0.34672	0.3583	0.00326398	0.038326
ZNF773	346	-0.41871	-0.44077	0.00329808	0.0386965
BMF	315.5	-0.63859	-0.73472	0.00331015	0.0388081
CD2AP	1102.8	0.335	0.34545	0.00332017	0.038872
IGSF8	738	0.34867	0.36051	0.00332071	0.038872
MAN1A1	3191	0.24687	0.25095	0.00335281	0.0392175
SLC8B1	853.7	0.31938	0.32843	0.00336728	0.0393565
RP11-686D22.7	53.6	0.75879	0.91826	0.00341769	0.039915
KANSL2	901.7	-0.33916	-0.3506	0.0034261	0.0399825
CFH	1884.9	0.36792	0.38198	0.00343152	0.0400152
SYVN1	2491.2	-0.34183	-0.35323	0.00345305	0.0402354
TGM1	39.2	0.82463	1.05825	0.00345695	0.0402499
AMD1	2820.6	-0.25097	-0.25545	0.00349195	0.0406263
ELK4	1282.9	0.48879	0.52354	0.00349572	0.0406391
CHSY3	194.1	0.5378	0.58748	0.00351745	0.0408425
TMED5	2337.2	0.32978	0.33984	0.00351859	0.0408425
ZNF337	454.9	-0.41487	-0.43834	0.00352456	0.0408806
SLK	3667.5	0.3392	0.35024	0.00353296	0.0409468
SUOX	366	0.42607	0.44836	0.0035588	0.0412149
METTL8	502.8	0.36837	0.38278	0.0035641	0.0412449
SYNJ2BP	843.9	0.42771	0.45056	0.00360184	0.0416223
CCNA2	281.2	-0.41726	-0.43397	0.0036022	0.0416223
ARL9	14.8	0.96586	1.69007	0.00360536	0.0416273
IMP3	873.2	-0.38347	-0.40032	0.0036171	0.0417311
RCBTB1	939.8	0.32582	0.33563	0.00362735	0.0418176
TOE1	235	-0.46164	-0.48944	0.00363632	0.0418893
HLA-K	130.3	0.62537	0.70494	0.00364397	0.0419457
MYO6	1755.8	0.29738	0.30477	0.00367007	0.0422063
ZNF689	386.9	-0.40643	-0.42516	0.00367217	0.0422063
CDCA8	96.7	-0.64986	-0.71619	0.00367791	0.0422349
IFNAR2	615	0.38157	0.39778	0.00368021	0.0422349
POLR3H	2445.3	-0.3001	-0.30778	0.00369186	0.0423215
TET2	1059.4	0.33436	0.34503	0.00369332	0.0423215
CCDC6	1492.2	0.32402	0.33369	0.00370001	0.0423662
TLDC1	2249	-0.27628	-0.28207	0.00370877	0.0424346
ZNF385A	487.1	0.42979	0.4538	0.00371434	0.0424663
ZNF154	342.6	-0.41027	-0.43111	0.00378826	0.043279
TLK1	1942.2	0.39312	0.4111	0.00380642	0.0434477
MT1X	192.8	-0.46934	-0.49414	0.00380875	0.0434477
RBM4B	319.2	-0.42185	-0.44376	0.00381328	0.0434668
CEP95	521.7	-0.40557	-0.42564	0.00381733	0.0434804
NRAV	290.8	-0.46399	-0.49515	0.0038207	0.0434862
MECOM	337.7	0.43935	0.46517	0.00383931	0.0436653
RNASEL	743.5	0.32871	0.33889	0.00384515	0.043699
MID1	1492.2	0.32814	0.33833	0.00385533	0.0437821
RP11-532F6.3	30.9	0.89888	1.2583	0.00386459	0.0438545
ZNF251	627.3	-0.32804	-0.33923	0.00387816	0.0439756
UACA	4883.9	-0.29796	-0.30551	0.00388729	0.0440463
ZNF608	633.4	-0.42962	-0.45598	0.00390342	0.0441962
SURF6	945.4	-0.36399	-0.37827	0.00390785	0.0442134
SPTBN5	160	0.56814	0.62752	0.0039529	0.0446899
ZNF142	786.1	-0.30991	-0.31849	0.00400148	0.0452054
ZNF891	59.8	-0.74807	-0.94613	0.00400974	0.0452651
TMEM216	599.6	-0.33585	-0.347	0.00402247	0.0453701
NOP58	1435.8	-0.30239	-0.31038	0.004025	0.0453701
MAML3	146.3	0.65451	0.75367	0.00409164	0.046087
FEN1	340.5	-0.46453	-0.49335	0.00412373	0.0464141
CEP85	258.2	-0.47296	-0.50748	0.00413006	0.046451
CDC73	1509.6	0.29797	0.30562	0.00414775	0.0465837
C5orf22	949.8	0.35013	0.36279	0.00414799	0.0465837
SH3PXD2B	4248.2	0.37714	0.39317	0.00415673	0.0466474
FNDC3A	8748.4	0.36998	0.38514	0.00420225	0.0471235
PSMA4	3711.4	0.32571	0.33581	0.00420815	0.0471549
TNFSF15	13.4	0.95101	2.38722	0.00421172	0.0471601
BMPR2	6669.2	0.34335	0.35527	0.00421867	0.0472032
PLIN2	4697.6	-0.27211	-0.27831	0.00423876	0.0473931
NDUFC1	709.8	0.34261	0.35451	0.00424819	0.0474636
SLC1A5	10272.9	0.3064	0.31476	0.00426611	0.0476288
TSPYL4	839.3	-0.28156	-0.28747	0.00427275	0.047668
WDR5B	287.1	-0.43958	-0.46765	0.00427655	0.0476754
ALKBH8	480.4	-0.40817	-0.42962	0.0042868	0.0477547
PNRC2	1062.2	0.29458	0.30198	0.00429708	0.0478341
CWC25	641	-0.32582	-0.33664	0.00431906	0.0480437
CNNM2	351.9	0.44207	0.4694	0.00432679	0.0480704
NUDT18	414.9	-0.46133	-0.49079	0.00432779	0.0480704
ANKRD54	587.4	-0.35366	-0.36756	0.0043313	0.0480743
DEK	2536.9	0.34664	0.35904	0.00435993	0.0483568
FAM53C	1764	-0.30446	-0.31314	0.00438847	0.048626
AOX1	1456.9	0.29782	0.30557	0.0043906	0.048626
DNASE2	2151.1	0.26069	0.26582	0.00439791	0.0486699
SMAD1	511.9	0.35977	0.37369	0.00440096	0.0486699
FGF9	37.9	-0.83169	-1.16455	0.00441996	0.0488445
NR2F2	3541.2	-0.3363	-0.34799	0.00445985	0.0492193
WWC3	1959.7	0.2853	0.29211	0.00446294	0.0492193
FLI1	445.4	0.38508	0.4026	0.00446359	0.0492193
CHSY1	1734.5	0.32859	0.33924	0.00452794	0.0498927

## Sheet: TIFIA siRNA
gene	baseMean	log2FC	log2FCunshrunk	pvalue	padj
POU2F2	1499.4	2.9339	3.03895	0	0
RRN3	717.8	-3.46919	-3.69666	0	0
DRAM1	9947.9	1.87545	1.90601	0	0
ACTG1	88900.2	-2.3132	-2.37401	0	0
PSG5	7153.1	1.91494	1.95335	0	0
CDKN1A	53346.9	1.75498	1.78915	0	0
MAMDC2	1324.6	2.46976	2.57391	0	0
TNFRSF10C	490.9	2.72521	2.88034	0	0
PRNP	8426.7	-1.96613	-2.02041	0	0
ARL2BP	1955.7	-1.76657	-1.80454	0	0
TECPR2	1999.4	1.73719	1.77488	0	0
DESI2	2438.4	1.68641	1.721	0	0
HNRNPAB	4072.8	-1.51398	-1.54165	0	0
ATP8B1	3923.1	1.56393	1.59385	0	0
SPATA18	2641.3	1.65168	1.68758	0	0
PIGS	2440.4	-1.69789	-1.73891	0	0
FAM198B	2198.8	1.51947	1.54759	0	0
HMGB2	438.4	-2.41789	-2.54418	0	0
CELF2	548.5	2.37937	2.5017	0	0
NT5E	12907	1.45839	1.48464	0	0
SMIM15	1134.3	1.7034	1.74632	0	0
TOP2A	470.9	-2.61303	-2.77881	0	0
SLC38A4	454.4	-3.07435	-3.45053	0	0
SRSF9	2006	-1.42617	-1.45417	0	0
MINPP1	1030.4	1.6636	1.70888	0	0
GNPNAT1	2637.6	1.57685	1.61514	0	0
RASSF2	1371.6	1.62665	1.66751	0	0
VPS4B	1478.9	1.51361	1.54946	0	0
MIR503HG	675.1	-2.19652	-2.30938	0	0
F2RL1	1061.7	1.78374	1.84326	0	0
IL6ST	16968.8	-1.50178	-1.53678	0	0
DIO2	1679.3	-1.58799	-1.62992	0	0
SESN1	1355.4	1.53633	1.57649	0	0
PAPPA	8511	1.45876	1.4928	0	0
ACTC1	3873.9	-2.26794	-2.40268	0	0
DPM1	918	-1.74593	-1.81027	0	0
SLC25A24	1323.7	-1.4905	-1.52953	0	0
NAA50	4303.7	1.41322	1.44457	0	0
RRM2	237.9	-2.71658	-2.96276	0	0
CXCL12	28266.9	-1.632	-1.68159	0	0
KIF20A	149	-3.20343	-3.65039	0	0
TACC1	3291.9	-1.32631	-1.35397	0	0
SLC2A3	3952.8	-1.43236	-1.46821	0	0
ANLN	410.1	-2.67922	-2.93501	0	0
BTG2	1221	1.79099	1.8642	0	0
CENPF	230.5	-2.80115	-3.10949	0	0
PLXNB1	1742.2	1.28259	1.30848	0	0
BBC3	1197	1.51142	1.55527	0	0
MKI67	282.8	-3.12564	-3.61336	0	0
TNFRSF10D	2530.8	1.46438	1.50511	0	0
ZCCHC24	3236.4	-1.10273	-1.11955	0	0
ECE1	14258	1.02592	1.03936	0	0
CCNA2	281.2	-2.21555	-2.38005	0	0
SCD	12128.2	-1.25696	-1.28269	0	0
LPXN	1264.9	1.27522	1.30177	0	0
BTBD3	773.4	-1.63599	-1.69609	0	0
H3F3B	8031.7	-1.1749	-1.19619	0	0
ELK3	4157.8	1.2137	1.23705	0	0
TNFRSF10B	9771.9	1.11758	1.13592	0	0
NIPAL3	2670.8	1.34739	1.37977	0	0
GPC1	15259.5	1.04815	1.06328	0	0
PRC1	381.2	-1.96247	-2.06255	0	0
CYFIP2	293.3	2.46725	2.7091	0	0
SGK1	3722.1	1.52955	1.57978	0	0
LYNX1	2575.2	1.18272	1.20551	0	0
FAM180A	950.5	1.63118	1.69303	0	0
COL11A1	8523.5	-1.16933	-1.1916	0	0
TSPAN11	501.7	1.65368	1.71793	0	0
CCT3	5629.4	-1.04115	-1.05714	0	0
PLXNB2	23381.2	0.92475	0.93586	0	0
ZADH2	1821.8	-1.36019	-1.39835	0	0
ISCU	3176.9	1.09063	1.10932	0	0
CDC20	135.1	-3.00304	-3.51138	0	0
RBMS1	3850.7	-1.15283	-1.17539	0	0
CHPF	7995.3	1.0997	1.11951	0	0
SSU72	2330.3	1.10877	1.12917	0	0
CDS2	1484.2	1.23351	1.26164	0	0
TK1	236	-2.49289	-2.75596	0	0
RHOJ	2272.9	1.20109	1.22731	0	0
TMEM2	5267.4	1.29371	1.32708	0	0
ZDHHC20	1046	-1.35007	-1.3881	0	0
ASAP1	4889.9	0.95307	0.96637	0	0
CSGALNACT2	1980.5	1.42376	1.47035	0	0
UBE2G2	1667	1.14044	1.16411	0	0
OSTM1	2430.6	1.32674	1.36377	0	0
PTBP3	1852.9	-1.2845	-1.31875	0	0
RPL22L1	1140.3	-1.68696	-1.76801	0	0
GABARAPL1	5472.6	-1.60513	-1.67452	0	0
STC1	891	1.93323	2.06101	0	0
DLGAP5	84.8	-3.05999	-3.76393	0	0
ST13	1618.2	1.14894	1.17503	0	0
ACSL4	3201.8	-1.389	-1.43627	0	0
HSPA4L	464.7	1.86231	1.97984	0	0
NOV	1023.9	1.84399	1.96011	0	0
SETD7	4536.8	1.16354	1.18977	0	0
KCNMA1	4156	1.09351	1.11525	0	0
ARL1	3216.5	-1.08341	-1.10497	0	0
ERMP1	880.8	-1.31213	-1.35517	0	0
DDB2	1290.2	1.5621	1.63045	0	0
ELFN1	1799.6	1.49077	1.54858	0	0
FDXR	1160.8	1.52858	1.59322	0	0
UBE2C	88.9	-2.96576	-3.60051	0	0
STMN1	1100.8	-1.2716	-1.3069	0	0
GMNN	252.4	-2.12155	-2.34203	0	0
SLC35B4	756.9	-1.36609	-1.41151	0	0
LMNB1	152.7	-2.54152	-2.87894	0	0
RGS20	168.1	2.37068	2.65647	0	0
LAMP1	20496.9	0.75117	0.75859	0	0
INPP5A	1342.7	1.30458	1.34528	0	0
E2F7	2170.3	1.12269	1.14825	0	0
KANK4	607.2	-1.81124	-1.93006	0	0
RRM1	1405.3	-1.11094	-1.13603	0	0
PRELP	3222.1	1.14573	1.17315	0	0
CNN2	11105.1	-0.82148	-0.83134	0	0
EAF1	588.3	-1.35974	-1.40644	0	0
LINC00294	551.7	1.56413	1.63737	0	0
KIF2C	172.2	-2.1332	-2.32563	0	0
FAS	4543	1.38277	1.43329	0	0
POLH	1403.8	1.07162	1.09442	0	0
RYBP	3621.3	1.33306	1.37826	0	0
CCDC50	4374.6	0.99769	1.01626	0	0
HOXA10	707.1	-1.36764	-1.42065	0	0
PDGFC	2256.6	0.98672	1.00481	0	0
SH2D5	388.9	1.59131	1.67585	0	0
CHRDL1	1969.9	1.01596	1.03568	0	0
RCAN2	1539.6	1.14542	1.17564	0	0
SHCBP1	133.1	-2.54353	-2.93834	0	0
MAFK	878.2	1.20299	1.23734	0	0
CEP55	136.7	-2.54731	-2.9447	0	0
ITGA2	7483	1.4923	1.56147	0	0
ASS1	8548.3	-0.99593	-1.01544	0	0
SLC17A5	2075.4	1.1234	1.15176	0	0
RRM2B	2744.7	1.4189	1.47855	0	0
PRKX	332.2	1.63623	1.73291	0	0
MYO1D	7550	-1.22322	-1.26136	0	0
STX6	1680.3	1.01064	1.03116	0	0
MTMR12	628.7	-1.38074	-1.43623	0	0
PLCB1	874.4	1.21144	1.24742	0	0
SPRY2	1761.6	1.27334	1.31653	0	0
MRPS35	1183.5	-1.08544	-1.11207	0	0
VAMP4	934.9	1.33957	1.39049	0	0
DPYSL4	998.4	1.19934	1.236	0	0
KIF18B	55.4	-3.07211	-4.22835	0	0
NUSAP1	107.3	-2.53442	-3.00571	0	0
HMGA1	11577.2	0.90833	0.92399	0	0
PLA2G15	1740.8	0.94573	0.96344	0	0
CYP1B1	5996.9	-1.08278	-1.11	0	0
DCUN1D3	630.4	1.3016	1.3497	0	0
TSPYL5	759.9	-1.23138	-1.27337	0	0
MCM6	931.1	-1.17685	-1.21264	0	0
NEDD4	1760.2	1.23804	1.28088	0	0
TGM2	5376	-1.24023	-1.28242	0	0
KDSR	3359	1.08924	1.11783	0	0
VWCE	245.8	1.8896	2.05688	0	0
TIMP2	57390.9	0.70826	0.71586	0	0
SEMA6D	457.2	1.51345	1.59462	0	0
CALD1	37455.1	-1.48262	-1.55861	0	0
MAMLD1	1179.7	1.17353	1.20921	0	0
ANGPTL4	551.2	1.75437	1.89336	0	0
CCNC	1192.2	1.13306	1.16596	0	0
ATF1	489.2	-1.53798	-1.63627	0	0
SLC30A9	2016.5	0.93022	0.94782	0	0
TNFSF4	692.7	-1.62845	-1.73418	0	0
TIGAR	1309.4	1.08561	1.11441	0	0
CD276	9657	0.84991	0.86343	0	0
MARCH4	2345.9	1.05623	1.08226	0	0
KIFC1	106.5	-2.3251	-2.65504	0	0
CAMSAP2	3465.1	0.94107	0.95983	0	0
ZMAT3	5490.5	1.04439	1.0703	0	0
BCL2L1	4017.8	0.91701	0.93426	0	0
MPLKIP	321.4	-1.69286	-1.82965	0	0
SOWAHC	467.8	-1.78153	-1.93693	0	0
PLK1	146.6	-2.3428	-2.70348	0	0
MOXD1	14051.5	0.78212	0.79289	0	0
SEC24A	3268.6	1.20642	1.24807	0	0
BTG1	2949.6	1.01355	1.03763	0	0
BACH1	3120.4	1.15281	1.18908	0	0
KIF23	347	-1.56472	-1.65885	0	0
EVC	4670	0.81101	0.82327	0	0
ARHGAP22	1667.6	1.3603	1.42139	0	0
ZNF219	2147.5	1.13008	1.16439	0	0
PTP4A1	6626.8	1.00301	1.02671	0	0
LXN	868.7	-1.22149	-1.26514	0	0
PPM1A	1403.6	1.00109	1.02481	0	0
ACVR2A	1095.4	-1.08887	-1.11947	0	0
CD59	28048.8	0.71824	0.7268	0	0
ARSD	615.4	-1.35098	-1.41541	0	0
PBK	55.6	-2.84439	-4.04347	0	0
CLDN12	744.2	-1.14643	-1.18417	0	0
PRR11	113	-2.31397	-2.71649	0	0
LRRC58	1144.1	-1.24798	-1.29908	0	0
CDC25B	2494.2	-0.90009	-0.91769	0	0
BATF2	676.9	2.85915	3.88796	0	0
SMURF2	6171.3	0.78706	0.79858	0	0
RDX	2289.9	-1.02832	-1.05537	0	0
SLC35A3	428.2	1.45647	1.53676	0	0
PCK2	3724.6	-1.18033	-1.22112	0	0
TPX2	514.6	-1.3332	-1.39059	0	0
KCTD5	912.6	-1.11856	-1.15321	0	0
WDR63	272.9	1.69358	1.82822	0	0
IFIT3	36001.9	3.13649	5.45045	0	0
CD46	7304.4	0.71221	0.72093	0	0
GAL3ST4	692.7	1.25845	1.30823	0	0
TCF19	152.7	-2.04099	-2.29181	0	0
CDCA8	96.7	-2.36807	-2.77508	0	0
NREP	17813.4	-1.18225	-1.22432	0	0
IFIT2	66047.5	3.16833	6.82612	0	0
STOM	8166.5	0.86004	0.87582	0	0
HJURP	69.5	-2.60034	-3.22196	0	0
ME1	1477.2	-1.21003	-1.25777	0	0
BIRC5	116.3	-2.40862	-2.88154	0	0
IQGAP3	96.4	-2.57168	-3.19862	0	0
MCL1	14029.7	0.99697	1.02198	0	0
TDRD7	896.7	1.61682	1.73727	0	0
STK32B	946.3	1.15769	1.19719	0	0
ZDHHC18	913.3	-1.0852	-1.11898	0	0
F2RL2	1200.9	1.12132	1.15881	0	0
VSTM4	1718.1	1.02178	1.04901	0	0
ANKRD10	931.6	1.03491	1.06377	0	0
PARP1	2125.7	-0.949	-0.97105	0	0
ANGPT1	720.5	-1.37185	-1.44371	0	0
ASPM	201.6	-1.83721	-2.0229	0	0
M6PR	3253.5	0.81449	0.82864	0	0
PODXL	815	1.08609	1.11917	0	0
S1PR2	830.5	1.20525	1.25347	0	0
MAP3K7CL	914.9	1.17094	1.21487	0	0
SNAI1	494.1	-1.35169	-1.42233	0	0
NYNRIN	2476.4	1.03662	1.06625	0	0
SDPR	160.6	2.19258	2.56051	0	0
CTD-2033D15.2	459	-1.61496	-1.72837	0	0
LMOD1	1505.3	-0.97019	-0.99411	0	0
BUB1B	57.4	-2.69309	-3.724	0	0
CEP97	283.4	-1.49414	-1.59288	0	0
FAM43A	974	1.32076	1.38561	0	0
NTN1	893	1.09912	1.13499	0	0
CDCA3	66.7	-2.42129	-2.96072	0	0
PPM1D	824.1	1.0548	1.08752	0	0
MAFF	1292.5	1.11551	1.154	0	0
OSBPL3	4617.1	0.91302	0.93363	0	0
PMEPA1	1695.4	1.39745	1.47716	0	0
GDF15	3323	1.33448	1.40556	0	0
SEPT6	712.4	-1.05758	-1.09069	0	0
SYNPO2	2950.1	-1.27702	-1.33685	0	0
IKBIP	2029.2	0.94227	0.9653	0	0
GUCY1A2	424.8	1.41283	1.4985	0	0
PARD6G	70.7	2.3793	2.94135	0	0
FHL3	1555.8	-0.90724	-0.92779	0	0
PIDD1	904.9	1.54114	1.65424	0	0
SLC7A8	1863.6	-1.21152	-1.26449	0	0
FAM83D	75.8	-2.41482	-3.03602	0	0
FGD4	532.5	1.15004	1.19278	0	0
CPXM2	2576.2	0.7249	0.73525	0	0
TRIM22	4876.1	1.10789	1.14707	0	0
TWISTNB	528.3	-1.26286	-1.32894	0	0
ASPN	565.8	-1.42418	-1.51615	0	0
FOXN2	633.8	1.13772	1.1813	0	0
SUSD1	791.5	-1.11487	-1.15258	0	0
VMP1	2687.5	-0.77072	-0.7837	0	0
CDC6	122.7	-1.98429	-2.24318	0	0
MDM2	6511.9	1.88033	2.11087	0	0
FEZ1	1617.8	0.84363	0.86059	0	0
MYBL2	120.7	-2.13228	-2.47565	0	0
BLOC1S2	1907.6	0.76261	0.775	0	0
NID2	10606.3	-0.72427	-0.73509	0	0
PLK2	1369.8	1.10718	1.14695	0	0
DTL	69.5	-2.37675	-2.90816	0	0
DNASE1L1	909.7	-1.04737	-1.08075	0	0
PLOD2	4908.1	-1.04487	-1.07942	0	0
C16orf52	623.5	1.14011	1.18517	0	0
PRSS12	8266.9	0.9418	0.96638	0	0
DEPDC1	42.9	-2.72829	-4.30358	0	0
UBL3	3328.7	0.9305	0.95424	0	0
CPEB2	1440.1	1.03275	1.06629	0	0
CEBPG	1748.6	-1.09106	-1.13075	0	0
SVIL	1643.4	0.874	0.89398	0	0
ACKR4	206.2	1.67991	1.85133	0	0
CARHSP1	1094.9	-0.92812	-0.95289	0	0
KIF4A	80	-2.31458	-2.85083	0	0
TMPO	760.4	-1.21258	-1.26662	0	0
ATP11C	1290.8	-1.01565	-1.04794	0	0
IER3IP1	687.2	1.16224	1.2121	0	0
GYS1	1694.8	-0.77902	-0.793	0	0
C11orf96	224.3	1.86508	2.09644	0	0
LOX	36339.8	0.65215	0.6603	0	0
TYMS	860.8	1.19371	1.24612	0	0
CCNB1	364.5	-1.33164	-1.40757	0	0
ERAP1	6243.3	-0.80021	-0.81585	0	0
DCLK1	541.8	1.10815	1.15129	0	0
VIT	278.5	1.42342	1.51728	0	0
REV3L	5313.3	0.98119	1.01057	0	0
GADD45B	1617.5	-1.23558	-1.295	0	0
CTBP1	2921.3	0.82189	0.8389	0	0
ITGB1	62560.2	0.79626	0.8116	0	0
IDS	2134.5	0.75606	0.76914	0	0
CCNB2	114.9	-1.98219	-2.28279	0	0
EGFR	9379.5	0.83676	0.85475	0	0
PMAIP1	2662.5	2.61841	3.77265	0	0
LEPROTL1	714.5	-1.02612	-1.06127	0	0
TMEM43	7435.8	0.64117	0.64912	0	0
SLC12A4	5016.6	0.68827	0.69817	0	0
NRP1	11807.3	0.74613	0.75881	0	0
PIP4K2A	2614.8	0.75984	0.77339	0	0
QSOX2	1027.9	0.8233	0.8404	0	0
GALNT5	4446.7	0.77433	0.78861	0	0
ECI1	733.4	-0.94708	-0.97429	0	0
DKK1	12116.2	0.67972	0.68935	0	0
NFATC2	227.5	1.73013	1.91053	0	0
AEN	3071.9	0.73956	0.75212	0	0
IDH1	3798.9	-0.80886	-0.82596	0	0
CDK17	1748.9	0.79216	0.80763	0	0
TPP1	14383.1	0.58457	0.5907	0	0
RP11-597D13.9	340.2	1.83617	2.08893	0	0
MCFD2	13364.5	0.84919	0.86846	0	0
CCP110	1033.3	0.83806	0.85646	0	0
BMPER	2957.6	0.90896	0.93289	0	0
PTPRM	4819.7	0.75126	0.76456	0	0
TPBG	5354.3	0.70673	0.71775	0	0
TRIP13	138.2	-1.71872	-1.89625	0	0
PRDX6	17189.8	-0.66783	-0.67708	0	0
ENAH	6785.3	-1.1	-1.14419	0	0
SEMA5A	11833.4	0.93271	0.95864	0	0
NCAPG	130.4	-1.89984	-2.17504	0	0
SLC31A2	511.3	1.29427	1.36771	0	0
ASXL2	1613.5	-0.86144	-0.88172	0	0
MIR34AHG	423	1.5372	1.6741	0	0
GTSE1	69.9	-2.19972	-2.66515	0	0
SASH1	4310.5	0.68263	0.69273	0	1e-15
TTC3	7621.3	0.71789	0.72968	0	1e-15
PCNA	2228	0.94562	0.97332	0	1e-15
SNRPA	667	-1.03139	-1.06703	0	1e-15
GADD45A	1538.5	1.28405	1.35795	0	1e-15
MOSPD1	1235.4	0.8289	0.84789	0	1e-15
GDNF	359.7	1.64001	1.8098	0	1e-15
TXNIP	14722.5	-0.91202	-0.93707	0	1e-15
SDC4	8613.3	0.64679	0.65549	0	1e-15
STMN3	188.3	1.59875	1.73775	0	1e-15
MFSD6	433.3	1.14291	1.19536	0	1e-15
TRAK1	4734.4	0.90359	0.92798	0	1e-15
PBX3	1980.6	0.81238	0.83012	0	1e-15
TROAP	40	-2.63638	-4.12321	0	1e-15
STRADB	547.4	1.15038	1.20414	0	1e-15
BCL10	1077.4	1.13785	1.18842	0	1e-15
RASA2	1668	0.90687	0.93241	0	2e-15
FUBP1	2352.7	-0.85808	-0.87954	0	2e-15
COL6A6	137.6	1.82684	2.07667	0	2e-15
ARHGAP5	2331.9	0.98023	1.01305	0	2e-15
TNFAIP3	753.7	1.49695	1.622	0	2e-15
EDA2R	1845.5	1.03588	1.07481	0	2e-15
FCHO2	902.8	0.99411	1.02866	0	2e-15
SAP30L	1432.9	0.80284	0.82022	0	3e-15
SYT11	1528.3	0.99298	1.02661	0	3e-15
CHST2	1132.2	0.9825	1.01523	0	3e-15
TRIM8	3351.9	0.66407	0.67385	0	4e-15
SLC4A7	3206.5	0.85201	0.87347	0	4e-15
TOB1	1395.8	0.89519	0.92012	0	4e-15
MID1	1492.2	0.93312	0.96179	0	4e-15
HELZ2	5163.7	1.83256	2.09932	0	4e-15
MAN2A1	5779.4	0.71512	0.7275	0	4e-15
TRAF4	1511.2	0.90452	0.93026	0	4e-15
GAS5	7280.9	-0.72512	-0.73818	0	4e-15
FAM210B	2880.5	0.83013	0.84985	0	4e-15
TMED5	2337.2	-0.95409	-0.98571	0	5e-15
CLN5	934.3	0.86069	0.88279	0	6e-15
TRAPPC6B	828.1	1.03721	1.07783	0	6e-15
BUB1	110.4	-1.96524	-2.30254	0	7e-15
FAM96A	536.8	-1.0362	-1.0785	0	7e-15
TNS2	2634.1	-0.84426	-0.86556	0	7e-15
XPR1	2052.6	0.86714	0.89028	0	8e-15
KDELR2	12902.3	0.59721	0.6045	0	8e-15
PTGFRN	2879.4	0.75633	0.77127	0	8e-15
TYW3	1068.2	-0.84568	-0.86775	0	8e-15
SLC22A23	972.8	-1.06127	-1.10906	0	9e-15
YIPF6	1639.2	0.82768	0.84776	0	1e-14
TRIM21	1494.7	1.28711	1.36868	0	1e-14
LINC00094	1312.7	0.73619	0.75022	0	1.1e-14
SUN1	3134.3	0.71751	0.73046	0	1.1e-14
TMEM47	5073.7	0.9838	1.01831	0	1.1e-14
BLMH	1527.1	-0.90429	-0.9314	0	1.3e-14
ADGRE5	2010.6	-0.69699	-0.7091	0	1.3e-14
KIF11	192.7	-1.5622	-1.71618	0	1.3e-14
TSC22D3	1048	-0.98073	-1.01412	0	1.4e-14
GTPBP2	4193.8	-0.7708	-0.78751	0	1.4e-14
ELFN2	1049.9	0.879	0.90292	0	1.4e-14
PRKAR2A	2627.9	-0.85143	-0.87392	0	1.4e-14
EREG	147.1	1.72274	1.95535	0	1.4e-14
KRT17	197.1	1.67351	1.88493	0	1.5e-14
LRP12	1261.7	0.82474	0.84495	0	1.6e-14
RGCC	208.7	1.39823	1.50278	0	1.6e-14
KCNJ2	119.6	1.88534	2.20301	0	1.7e-14
TNFRSF10A	152.1	1.65622	1.86944	0	1.7e-14
SGMS2	1103.1	0.93211	0.96251	1e-15	2e-14
GID4	659.7	0.94736	0.97914	1e-15	2e-14
CKAP2L	84	-2.02205	-2.42443	1e-15	2e-14
CDT1	50.1	-2.30844	-3.15079	1e-15	2e-14
ZNF217	1720.3	0.8533	0.87572	1e-15	2.2e-14
FAR1	1500.8	-0.82501	-0.84601	1e-15	2.3e-14
ZNF503	712.6	-1.34083	-1.43534	1e-15	2.3e-14
DDAH1	6502	-1.19147	-1.25744	1e-15	2.4e-14
CCND1	19631	1.03078	1.07182	1e-15	2.6e-14
NADSYN1	2111.8	0.67749	0.68868	1e-15	2.8e-14
MAP4K3	1600.4	0.90574	0.93317	1e-15	2.8e-14
AURKA	193.3	-1.57666	-1.73531	1e-15	2.8e-14
HIST1H2AC	659.5	0.98502	1.02224	1e-15	3e-14
CHSY1	1734.5	0.92404	0.95336	1e-15	3e-14
PCTP	337.5	-1.25524	-1.33884	1e-15	3.1e-14
NBL1	1553.6	0.71604	0.72923	1e-15	3.3e-14
SAT1	1708.2	0.92808	0.95865	1e-15	3.4e-14
DPP9	1826	-0.76564	-0.78258	1e-15	3.4e-14
PODNL1	612.8	-1.00864	-1.04687	1e-15	3.5e-14
ALDH1A1	14029.6	-0.76476	-0.78108	1e-15	3.8e-14
AFF4	6493.4	1.13085	1.18717	1e-15	3.8e-14
FAM64A	63.4	-2.25668	-2.93807	1e-15	3.9e-14
EXTL3	3714.1	0.6137	0.62204	1e-15	4.1e-14
ANTXR2	4211.1	0.96647	1.00071	1e-15	4.4e-14
TACC3	350.2	-1.18047	-1.24784	1e-15	4.5e-14
PITPNA	3858.8	0.87016	0.89498	1e-15	4.6e-14
RASSF3	1525.2	0.82625	0.84731	1e-15	4.7e-14
PC	427.4	-1.1784	-1.24265	1e-15	4.9e-14
TMEM200A	2840.2	0.68836	0.70028	1e-15	5e-14
PLA2R1	1869.9	0.67863	0.69008	2e-15	5.7e-14
WDR37	1148.9	0.83985	0.86203	2e-15	6e-14
BLOC1S6	2275.3	0.85696	0.88073	2e-15	6.3e-14
RTN4	25915.4	0.61908	0.62778	2e-15	6.5e-14
FLRT2	2371	0.93184	0.96269	2e-15	6.6e-14
RECK	11588.9	-0.6286	-0.63776	2e-15	7e-14
SPAG5	125	-1.6581	-1.84238	2e-15	7.5e-14
MAP2K4	1511.6	0.79052	0.80941	2e-15	7.6e-14
KCTD9	1060.7	-0.98573	-1.02351	2e-15	7.9e-14
SATB1	405.2	1.21296	1.28651	2e-15	8e-14
DTX3L	4036.7	1.20401	1.27524	2e-15	8.2e-14
TGFA	121	1.80284	2.0746	3e-15	9.9e-14
ANK1	397	1.09039	1.14167	3e-15	9.9e-14
SUSD6	1617.4	0.7782	0.7961	3e-15	1e-13
IFITM2	6584.9	-0.75748	-0.77402	3e-15	1.16e-13
PLPP2	134	1.93002	2.30892	4e-15	1.2e-13
EI24	5817	0.61784	0.6267	4e-15	1.26e-13
CDH13	1540.8	0.7653	0.78256	4e-15	1.27e-13
MCM4	552	-0.93038	-0.95976	4e-15	1.27e-13
TBPL1	682.2	0.87795	0.90474	4e-15	1.38e-13
SKP2	704.1	-1.25141	-1.3346	4e-15	1.43e-13
CLCA2	153.7	1.55674	1.74153	5e-15	1.54e-13
KCNS3	418.9	1.05347	1.10142	7e-15	2.18e-13
ABHD2	1849.6	0.74442	0.76052	8e-15	2.7e-13
MAPRE3	506.9	1.02162	1.0654	8e-15	2.79e-13
DACT1	876	-1.00742	-1.04898	9e-15	2.8e-13
ALDH1L2	8906.9	-0.79936	-0.8196	9e-15	2.9e-13
DCHS1	4045.7	0.67658	0.68854	9e-15	2.93e-13
LIG1	351.2	1.07798	1.12808	9e-15	2.94e-13
ENPP2	6680.4	-0.66798	-0.67958	9e-15	2.97e-13
CYLD	2677.7	0.86689	0.89333	1e-14	3.28e-13
ASF1B	63.1	-2.07047	-2.59872	1e-14	3.38e-13
HHIP	190.6	1.60734	1.78396	1.2e-14	4.04e-13
SAMD4B	3958.3	0.70658	0.7205	1.3e-14	4.1e-13
PHLDA3	6289.9	0.66171	0.67313	1.3e-14	4.12e-13
KRT34	810.2	0.82602	0.84868	1.3e-14	4.16e-13
GNPTAB	3470	0.75283	0.7694	1.3e-14	4.17e-13
PITX2	300.4	-1.32422	-1.42615	1.3e-14	4.25e-13
TFCP2	1048.2	-0.76823	-0.78723	1.4e-14	4.41e-13
DPY19L3	1630.9	0.83895	0.8628	1.5e-14	4.64e-13
MFGE8	17078.2	0.59116	0.59929	1.7e-14	5.28e-13
RNF6	1845.4	-0.69832	-0.71218	1.7e-14	5.31e-13
SLC7A11	6103.5	0.81878	0.84101	1.8e-14	5.56e-13
SFXN1	2014.9	0.71074	0.72497	1.9e-14	5.88e-13
FAM217B	224.1	-1.37608	-1.51705	2e-14	6.24e-13
KRT80	73.4	-1.89665	-2.27353	2e-14	6.32e-13
CTSF	1243.9	0.72181	0.73671	2.1e-14	6.53e-13
NDC80	82.1	-1.88716	-2.26793	2.1e-14	6.55e-13
RAB21	1401.3	0.73385	0.7499	2.2e-14	6.96e-13
MMP1	1655.4	1.13007	1.19219	2.3e-14	7.18e-13
MTCH1	9895.1	-0.56137	-0.56839	2.4e-14	7.44e-13
RAF1	3020.2	-0.59947	-0.60802	2.4e-14	7.5e-13
RRAGC	1369	0.8872	0.91652	2.4e-14	7.57e-13
VOPP1	820.6	0.82548	0.84831	2.5e-14	7.64e-13
ARL4C	792.8	1.05354	1.10422	2.6e-14	8.12e-13
DDX3Y	2608.5	0.93898	0.97368	2.8e-14	8.78e-13
INPP1	1063.6	0.80003	0.82123	2.9e-14	8.82e-13
RP5-1039K5.12	478.9	0.99931	1.04273	3.1e-14	9.61e-13
TRIAP1	1541.7	0.86214	0.88892	3.2e-14	9.69e-13
EMC10	4622.2	0.60581	0.61478	3.2e-14	9.72e-13
COLGALT1	7597.3	0.56309	0.57027	3.3e-14	9.96e-13
MAPK8IP1	343.4	1.12248	1.18279	3.5e-14	1.067e-12
MAN2B2	4635.2	0.55267	0.55947	3.6e-14	1.089e-12
MAFG	2313.2	0.70435	0.71871	3.7e-14	1.115e-12
MDK	1470.5	-0.67367	-0.68588	3.7e-14	1.131e-12
TLCD2	373	-1.09793	-1.1567	3.8e-14	1.154e-12
PRKCE	696.5	0.84744	0.87336	3.9e-14	1.185e-12
LINC01759	213.9	1.37323	1.50398	4.4e-14	1.335e-12
RGMB	21007.3	0.67698	0.68977	4.6e-14	1.384e-12
RP11-135F9.3	153.3	1.4654	1.62296	5e-14	1.49e-12
FKBP9	14610	0.55051	0.55731	5e-14	1.506e-12
AKNA	1782.2	-0.93212	-0.96791	5.1e-14	1.508e-12
TRAK2	4958.8	0.58664	0.59491	5.2e-14	1.547e-12
ERC1	3271.5	0.86645	0.89424	5.2e-14	1.555e-12
SCRIB	2671.7	0.79652	0.81783	5.4e-14	1.596e-12
PSRC1	161.1	-1.48019	-1.64207	5.9e-14	1.738e-12
PCSK9	1208.4	-0.80156	-0.82453	5.9e-14	1.74e-12
ARHGAP11A	321.9	-1.2303	-1.3146	5.9e-14	1.749e-12
RACGAP1	362.5	-1.01836	-1.05922	6.3e-14	1.847e-12
CAMK2N1	3457.1	0.79935	0.82113	6.4e-14	1.887e-12
ABHD12	1940.4	0.71065	0.72592	6.8e-14	1.984e-12
NIF3L1	334.6	-1.11411	-1.17959	6.8e-14	2.001e-12
SMPD1	4717.3	0.67315	0.6859	7.3e-14	2.118e-12
MAP4K4	16314.5	1.00445	1.04914	7.7e-14	2.249e-12
SDK1	772.9	0.87044	0.89866	8.5e-14	2.467e-12
SOCS4	727.6	0.91812	0.95183	9.2e-14	2.679e-12
VEGFB	2277.7	0.69799	0.7124	9.3e-14	2.69e-12
RP11-54O7.3	1331.9	-1.00771	-1.054	9.4e-14	2.72e-12
WWC3	1959.7	0.74207	0.75926	9.8e-14	2.814e-12
DOK5	547.9	1.10174	1.16295	1.02e-13	2.943e-12
CDK1	101.9	-2.02846	-2.58119	1.04e-13	2.997e-12
ZCCHC14	1731.8	1.01086	1.05793	1.12e-13	3.224e-12
KIF26B	4139.3	-0.80507	-0.82781	1.14e-13	3.268e-12
FMR1	1089.4	1.08685	1.14636	1.16e-13	3.316e-12
HEATR1	2457.8	0.73218	0.74915	1.17e-13	3.325e-12
DHX36	1914.6	-0.84182	-0.86858	1.17e-13	3.341e-12
FCHSD2	2023	-0.68017	-0.69403	1.23e-13	3.494e-12
C19orf12	1334.1	0.7931	0.81509	1.26e-13	3.576e-12
CADM1	2601.1	0.98468	1.02727	1.49e-13	4.202e-12
TNFAIP8	720.4	1.16378	1.23851	1.51e-13	4.254e-12
TCTA	895.7	-0.79029	-0.8106	1.6e-13	4.512e-12
SELENON	6635	-0.567	-0.57488	1.62e-13	4.551e-12
NR4A3	209	1.38823	1.52756	1.68e-13	4.712e-12
SERINC3	8677.6	0.5656	0.57334	1.69e-13	4.725e-12
C19orf48	586.8	-0.92387	-0.95829	1.71e-13	4.772e-12
RPL22	2825	0.5744	0.58257	1.82e-13	5.067e-12
OMG	84.9	1.83512	2.26277	1.83e-13	5.077e-12
EPHA2	1948.6	0.86959	0.89885	1.83e-13	5.077e-12
GLIS2	3037.1	0.68194	0.69555	1.84e-13	5.104e-12
PRRX1	10317.2	0.57657	0.58482	1.89e-13	5.245e-12
BIRC3	438.6	1.33025	1.44779	1.91e-13	5.288e-12
NUF2	39.3	-2.24195	-3.33363	2.15e-13	5.921e-12
STXBP6	537.2	1.34761	1.47183	2.27e-13	6.246e-12
ATP6V0A1	1012.8	0.77812	0.79875	2.36e-13	6.475e-12
ARHGAP29	4002.8	0.68702	0.70129	2.63e-13	7.194e-12
GCC2	1570.3	0.71738	0.73378	2.63e-13	7.194e-12
COL13A1	423.9	0.99173	1.03696	2.64e-13	7.215e-12
PLPP3	6788.8	-0.98151	-1.02535	2.69e-13	7.341e-12
SLC39A8	438.4	-1.06285	-1.11651	2.8e-13	7.617e-12
PAM	17366.7	0.61708	0.62737	2.83e-13	7.701e-12
FOXL1	614.9	0.91785	0.95212	2.87e-13	7.782e-12
FBXO22	1418.5	0.67801	0.69185	2.88e-13	7.8e-12
MYL6	24698.7	-0.57483	-0.58307	2.94e-13	7.955e-12
TUFT1	379.3	-1.29748	-1.40799	2.96e-13	7.989e-12
CDK4	4424.4	-0.6032	-0.61306	2.99e-13	8.062e-12
CFD	636.4	-0.95714	-0.99677	3.15e-13	8.459e-12
FST	7757	0.9345	0.97243	3.16e-13	8.477e-12
MPP5	1043.9	-0.7196	-0.73588	3.2e-13	8.57e-12
TNKS2	4483.6	0.81342	0.8379	3.31e-13	8.851e-12
RHOQ	3440.9	0.72488	0.74202	3.39e-13	9.038e-12
DUSP3	2665.1	0.784	0.80562	3.4e-13	9.065e-12
TCF4	2980.8	0.9757	1.01907	3.55e-13	9.427e-12
GRHPR	1805.5	-0.67056	-0.68436	3.55e-13	9.427e-12
TMEM19	296	-1.18156	-1.26632	3.56e-13	9.432e-12
TMTC1	5836	0.65875	0.67151	3.81e-13	1.0075e-11
PPFIBP1	3534.6	0.67575	0.68955	4.18e-13	1.1026e-11
AVL9	2014.7	-0.66482	-0.67856	4.33e-13	1.1406e-11
KIF14	77.6	-1.83496	-2.19621	4.67e-13	1.2274e-11
KCNK2	3135	0.83807	0.86493	4.68e-13	1.2274e-11
PLXNC1	2050.2	0.73127	0.7493	4.68e-13	1.2274e-11
TMEM131	3939.2	0.59582	0.60528	4.81e-13	1.2587e-11
CLTCL1	415.7	-1.04091	-1.09428	4.83e-13	1.2621e-11
WDR7	647.9	-0.87707	-0.90909	4.85e-13	1.265e-11
RTKN2	120.7	-1.63166	-1.87905	4.9e-13	1.2736e-11
ITGA6	1106	0.96821	1.01092	5.02e-13	1.3048e-11
TSPYL4	839.3	-0.72626	-0.74348	5.08e-13	1.3179e-11
RNF24	2695.8	0.82172	0.84732	5.12e-13	1.3259e-11
MT1X	192.8	-1.21924	-1.30266	5.7e-13	1.4724e-11
LYRM2	916.1	-0.81621	-0.84375	5.92e-13	1.5258e-11
NFKB2	1430.6	0.66258	0.67568	6.29e-13	1.6185e-11
PHPT1	1979.9	0.65662	0.66948	6.56e-13	1.6821e-11
AJAP1	162.8	1.33655	1.45762	6.56e-13	1.6821e-11
THSD1	170.6	1.62875	1.89052	6.65e-13	1.7039e-11
KIF22	242.8	-1.21144	-1.29838	6.78e-13	1.7309e-11
KNL1	75.6	-1.96897	-2.50308	6.78e-13	1.7309e-11
WLS	3618.5	0.55324	0.56088	6.8e-13	1.7318e-11
GRB2	1884.5	0.65267	0.66539	7.07e-13	1.7962e-11
NCKAP5	470.1	1.10815	1.17596	7.08e-13	1.7962e-11
B3GNT9	1911.6	0.69654	0.71218	7.72e-13	1.9571e-11
DDX60	2058	1.73207	2.05445	7.95e-13	2.0103e-11
FBXO33	679.6	0.84468	0.87315	7.96e-13	2.0103e-11
RGAG4	473.5	0.95464	0.99669	8.06e-13	2.0319e-11
CASK	1760.1	0.78262	0.80506	8.14e-13	2.0498e-11
APLP2	33919.4	0.48066	0.48566	8.71e-13	2.1894e-11
ANKRD46	356.8	-1.13244	-1.21638	9.14e-13	2.2885e-11
CDK5RAP2	1980.2	-0.80276	-0.82737	9.14e-13	2.2885e-11
CHST3	4733.3	0.75164	0.77128	9.23e-13	2.3066e-11
CMBL	920.9	0.94941	0.99002	9.34e-13	2.3297e-11
AURKB	62.1	-1.9599	-2.48483	9.38e-13	2.3373e-11
RP1-152L7.5	183.6	-1.36602	-1.49855	9.46e-13	2.3518e-11
CREBL2	1190.2	0.66989	0.68366	1.015e-12	2.521e-11
COX20	574.4	-0.91693	-0.95368	1.022e-12	2.5327e-11
PAMR1	6289.6	0.55245	0.56017	1.029e-12	2.5455e-11
CES2	2459.8	0.59141	0.60095	1.074e-12	2.6518e-11
TGFBR1	2234.1	-0.73309	-0.75171	1.094e-12	2.6978e-11
COBLL1	1257.8	0.92511	0.96412	1.096e-12	2.6984e-11
RAB2A	4433	0.60398	0.61416	1.136e-12	2.7929e-11
WASL	1453.6	-0.74896	-0.7699	1.145e-12	2.8102e-11
CENPU	44.6	-2.09539	-2.90575	1.237e-12	3.0306e-11
IFIT1	22957.8	2.33661	4.78292	1.25e-12	3.0561e-11
CHIC2	1068.4	0.68712	0.70225	1.272e-12	3.1053e-11
SNED1	3545.5	-0.59848	-0.60844	1.348e-12	3.2853e-11
PPP4R3A	2455.5	0.64904	0.66185	1.352e-12	3.2903e-11
BAALC	877.3	0.86106	0.8916	1.548e-12	3.7602e-11
LYSMD1	214.4	-1.28299	-1.39906	1.602e-12	3.8855e-11
MARS	8109.4	-0.61569	-0.62665	1.63e-12	3.9469e-11
MMP11	438.8	1.12807	1.20447	1.676e-12	4.0508e-11
KDM1B	614.4	-0.85532	-0.88615	1.726e-12	4.1659e-11
RAB3B	7922.8	0.86636	0.89812	1.945e-12	4.6867e-11
NFIL3	1889	0.72379	0.74213	1.956e-12	4.7047e-11
FBXW7	1120.6	0.73197	0.75086	2.022e-12	4.8563e-11
FAM103A1	153	-1.31923	-1.44995	2.065e-12	4.9505e-11
PLK4	58.7	-1.87884	-2.36566	2.146e-12	5.1363e-11
ABCA2	2162.8	0.58408	0.59348	2.243e-12	5.3596e-11
LYSMD3	890.5	0.85722	0.88852	2.396e-12	5.7163e-11
GHDC	409	-1.04951	-1.11114	2.435e-12	5.7988e-11
TMEM127	5194	0.59198	0.60187	2.54e-12	6.0405e-11
MAPK1	5197.4	-0.62915	-0.6411	2.751e-12	6.532e-11
GRN	20411.1	0.4754	0.48048	2.839e-12	6.7285e-11
FOXO3	1723.4	0.85322	0.88426	2.844e-12	6.7298e-11
FOSL1	3334.7	1.05411	1.11505	2.863e-12	6.7641e-11
TP53INP1	1457.3	0.77474	0.79758	2.969e-12	7.0024e-11
CDKN3	58.7	-1.95481	-2.55242	3.031e-12	7.1379e-11
ITGA4	4481.5	0.6462	0.65934	3.415e-12	8.03e-11
RNF19B	769.3	1.17717	1.26832	3.501e-12	8.2183e-11
XG	147.6	1.38102	1.53572	3.515e-12	8.2372e-11
TMEM217	115.9	1.45813	1.65728	3.525e-12	8.2484e-11
HR	572.5	-0.86107	-0.89356	3.544e-12	8.2792e-11
PTPA	4274.3	-0.54538	-0.55322	3.558e-12	8.2994e-11
SLC2A4RG	1448	-0.65896	-0.67311	3.639e-12	8.4751e-11
ASAP2	3056.8	0.91128	0.94971	3.655e-12	8.4982e-11
COL5A3	11165.1	0.88153	0.91579	4.043e-12	9.3858e-11
SIPA1L3	1708.6	1.01292	1.06706	4.089e-12	9.4779e-11
EFNB1	737.3	0.87379	0.90737	4.122e-12	9.539e-11
AK4	73.4	-1.80317	-2.33329	4.486e-12	1.03654e-10
CDV3	7283.4	0.60819	0.61924	4.706e-12	1.08523e-10
PSIP1	864.6	-0.92398	-0.96646	4.718e-12	1.08523e-10
PPTC7	773.6	0.79673	0.82214	4.719e-12	1.08523e-10
MCM2	390.3	-0.99093	-1.04253	5.022e-12	1.15294e-10
CEP104	1155.9	0.6797	0.69527	5.051e-12	1.15776e-10
YBX3	5956.3	0.63208	0.64457	5.358e-12	1.22633e-10
NSD2	1728.9	-0.60038	-0.61081	5.377e-12	1.22876e-10
STK24	4350.1	0.80387	0.83029	5.479e-12	1.25019e-10
CHEK1	353.5	-1.06689	-1.13084	5.57e-12	1.26829e-10
SPAG9	5189.4	0.85497	0.88699	5.576e-12	1.26829e-10
TPST2	1846.3	0.75423	0.77582	5.672e-12	1.28808e-10
FAM114A1	5868.4	0.54637	0.55437	5.722e-12	1.29745e-10
MORF4L2	10352.2	0.61896	0.63071	5.781e-12	1.30879e-10
CXXC5	2853.9	-0.7307	-0.75034	5.79e-12	1.30879e-10
IFT57	2109	0.65823	0.67254	6.07e-12	1.37011e-10
MCAM	442.7	-1.25229	-1.3584	6.1e-12	1.37456e-10
PDHB	2332.9	-0.61102	-0.62229	6.117e-12	1.37648e-10
NCAPH	39.8	-2.08638	-2.89266	6.418e-12	1.44046e-10
GLTP	1883.7	0.59775	0.60833	6.422e-12	1.44046e-10
NORAD	7452.1	0.57844	0.58801	6.913e-12	1.54647e-10
MEDAG	683.2	-0.81532	-0.8422	6.915e-12	1.54647e-10
PKMYT1	34.9	-2.11738	-3.13188	6.958e-12	1.55376e-10
EHD3	3895.2	0.75469	0.77632	7.276e-12	1.62226e-10
LMBR1	1125.4	0.75346	0.77509	7.395e-12	1.64446e-10
BAX	3456.2	0.6234	0.63553	7.398e-12	1.64446e-10
USP6NL	638.5	0.80568	0.83332	7.503e-12	1.66304e-10
APBB1	1561.8	0.63756	0.65058	7.505e-12	1.66304e-10
THSD4	3621.9	0.63044	0.64289	8.21e-12	1.81656e-10
MSANTD3	2557.7	0.65215	0.66621	8.371e-12	1.84944e-10
GOLM1	2385.4	-0.68501	-0.70177	8.579e-12	1.89266e-10
PLBD2	7722.7	0.51219	0.51883	9.054e-12	1.99427e-10
PPP1R15A	6161.3	0.69192	0.70895	9.386e-12	2.0644e-10
PTPRU	3089.6	0.60318	0.61433	1.0427e-11	2.28986e-10
FGFR1	15185.1	0.594	0.60462	1.0528e-11	2.30859e-10
MYLK	22687.4	-0.67284	-0.68847	1.0935e-11	2.39428e-10
WBP1L	3230.4	0.53982	0.54773	1.1281e-11	2.46627e-10
HNMT	625.5	-0.91881	-0.96211	1.1419e-11	2.49273e-10
EIF4EBP1	2265.6	-0.67762	-0.69382	1.1455e-11	2.49687e-10
DCAF1	1053.7	0.72539	0.74528	1.1933e-11	2.59726e-10
FAM212B	342.8	1.10829	1.18505	1.2244e-11	2.66093e-10
LHFPL2	3170.7	0.73649	0.75747	1.2565e-11	2.72668e-10
SPOCK1	23830.8	0.75389	0.77634	1.3424e-11	2.90876e-10
TET1	123.8	-1.51225	-1.74236	1.378e-11	2.98114e-10
KPNA2	1888.3	-0.76309	-0.78636	1.3799e-11	2.98114e-10
NTN4	4771.7	0.85902	0.89285	1.3974e-11	3.01468e-10
PHLDA1	3609.6	0.93065	0.97483	1.4231e-11	3.06542e-10
CD151	17011.8	0.44011	0.44441	1.4744e-11	3.17144e-10
TMEM248	4531.6	0.5861	0.59643	1.5096e-11	3.24225e-10
FZD7	3353.1	-0.56577	-0.57501	1.5122e-11	3.24314e-10
TGFBRAP1	1740.4	0.615	0.62714	1.5271e-11	3.2703e-10
ELOVL5	3804.5	-0.62918	-0.64156	1.5299e-11	3.27151e-10
VEGFA	4333.7	-0.6321	-0.64541	1.5456e-11	3.30023e-10
DKK3	31560	0.49115	0.49716	1.5521e-11	3.30565e-10
MAPK13	656.6	0.76529	0.78914	1.5526e-11	3.30565e-10
TMEM177	147.6	-1.35347	-1.51179	1.5993e-11	3.40014e-10
SEMA3A	2990.2	0.81085	0.83931	1.6138e-11	3.42599e-10
ESPL1	99.1	-1.49929	-1.71071	1.652e-11	3.50186e-10
GLT8D2	2048.6	-0.624	-0.6368	1.6596e-11	3.513e-10
SKA3	33.9	-2.06135	-3.00706	1.6714e-11	3.53294e-10
NR4A2	85.5	1.78111	2.19346	1.7577e-11	3.70989e-10
MORF4L1	4977	0.50525	0.51187	1.7659e-11	3.72182e-10
TBC1D23	2360.1	0.63166	0.64485	1.7854e-11	3.75745e-10
TM9SF4	3950.2	0.48338	0.48917	1.8415e-11	3.87003e-10
PTPRQ	180.2	-1.21574	-1.326	1.8534e-11	3.8895e-10
PBDC1	794.2	-0.73888	-0.76081	1.8755e-11	3.93019e-10
TMEM198	141.1	1.44022	1.62947	1.8894e-11	3.9537e-10
IFIT5	1729.2	0.82353	0.85371	1.894e-11	3.95769e-10
NOB1	1474.9	-0.60478	-0.61672	1.9506e-11	4.07014e-10
SFRP4	100.6	1.50058	1.74182	2e-11	4.16719e-10
SEMA3C	12612.5	0.65561	0.67042	2.1622e-11	4.49878e-10
PTCHD4	56.5	1.91361	2.63188	2.2174e-11	4.6072e-10
SH3BP2	1026.4	-0.71543	-0.7355	2.282e-11	4.73464e-10
ADCY7	902.1	-0.78651	-0.81349	2.3284e-11	4.82204e-10
GUCY1A3	161.6	-1.4643	-1.71769	2.3307e-11	4.82204e-10
KLF9	1502.9	0.9012	0.94215	2.3615e-11	4.87897e-10
NACC2	1720.4	0.65	0.6645	2.3993e-11	4.95005e-10
SERPINB2	2721.3	1.73221	2.14402	2.4629e-11	5.07396e-10
BTBD10	1879	0.55999	0.56923	2.6408e-11	5.43296e-10
CTSK	24919.7	0.55627	0.56532	2.668e-11	5.48122e-10
SAMD4A	2448.9	1.03172	1.09449	2.6857e-11	5.5098e-10
FZD2	1105.9	-0.83242	-0.8651	2.6998e-11	5.53093e-10
STK38L	982.5	-0.87654	-0.91228	2.9453e-11	6.0255e-10
N4BP2	443.7	-1.00208	-1.06077	2.9748e-11	6.0773e-10
RP2	1109.3	1.08707	1.16394	2.9912e-11	6.1024e-10
ZFHX3	1389.9	0.89497	0.93515	3.0074e-11	6.12696e-10
IDO1	189.2	2.18077	5.18078	3.0468e-11	6.1985e-10
ACAN	5315.5	-0.70444	-0.72297	3.0542e-11	6.20504e-10
FANCI	216.9	-1.15478	-1.2442	3.0656e-11	6.2196e-10
MINDY2	1130	0.81369	0.84324	3.2102e-11	6.5039e-10
RELL2	252.2	1.20429	1.30675	3.2227e-11	6.52012e-10
GNB1	16539.5	0.55512	0.5642	3.2708e-11	6.60834e-10
TRAPPC13	530.4	-0.88749	-0.92945	3.3377e-11	6.73422e-10
PPP1CC	2916.9	0.57145	0.58136	3.3912e-11	6.83282e-10
TPI1	5613.5	-0.4716	-0.47716	3.4439e-11	6.92942e-10
TAPBP	4553.6	0.65324	0.66822	3.5028e-11	7.03826e-10
CDC45	26.8	-2.09683	-3.46807	3.6323e-11	7.28851e-10
RPS19	29258.5	0.48269	0.48864	3.6766e-11	7.36735e-10
TCF12	3826	-0.56683	-0.57662	3.741e-11	7.47675e-10
MAST4	1173.3	0.73279	0.75434	3.7414e-11	7.47675e-10
FBXW5	4027.6	0.56205	0.57155	3.7602e-11	7.50402e-10
TGFB1I1	4243.9	-0.60908	-0.62115	3.778e-11	7.52931e-10
PLAUR	2595.2	0.56553	0.57526	3.9579e-11	7.87701e-10
DIRAS1	812.5	0.76227	0.78639	4.0492e-11	8.04778e-10
CLSPN	47.9	-1.92082	-2.55554	4.0999e-11	8.13752e-10
PRKCA	4033.9	0.59201	0.60307	4.1358e-11	8.19776e-10
TMEM65	730.9	-0.77145	-0.79843	4.3664e-11	8.64313e-10
MXRA5	12156.8	-0.69326	-0.71132	4.4456e-11	8.78798e-10
APP	64169.9	0.5922	0.60343	4.4874e-11	8.85875e-10
TTK	48.2	-1.88953	-2.4783	4.6344e-11	9.13656e-10
PAX8-AS1	786.8	0.74908	0.77183	4.7989e-11	9.4481e-10
CTSA	18178.5	0.46596	0.47138	4.85e-11	9.53598e-10
CAV1	24016.6	0.53906	0.54751	5.0951e-11	1.00044e-09
MAPK11	426.4	0.84125	0.87415	5.1426e-11	1.00843e-09
MXI1	663.3	0.77351	0.79949	5.3077e-11	1.0394e-09
DTD2	472.1	-0.81144	-0.84328	5.3429e-11	1.0449e-09
ABLIM3	2679.4	0.51317	0.5205	5.5623e-11	1.08635e-09
SRSF7	2616.8	-0.60039	-0.61228	5.6558e-11	1.10177e-09
ZC3HAV1	9854.6	1.90044	2.6082	5.6563e-11	1.10177e-09
PLA2G4A	698.5	1.74	2.19206	5.8186e-11	1.13189e-09
PHF10	655.4	-0.82384	-0.85738	5.9779e-11	1.16132e-09
MMP14	58948.2	0.58376	0.59471	6.2283e-11	1.20838e-09
EFL1	1198.3	0.61259	0.62527	6.3973e-11	1.23953e-09
ROBO2	483.8	0.83965	0.87248	6.6505e-11	1.28688e-09
ENTPD4	2650.2	0.56381	0.57364	6.7465e-11	1.30373e-09
ZNF697	813.5	0.70689	0.72675	6.8806e-11	1.32789e-09
TNFSF18	1592.4	-0.74923	-0.77273	7.3369e-11	1.41409e-09
LAMC1	81075.7	0.74139	0.76436	7.4322e-11	1.43058e-09
MAN1A1	3191	0.5455	0.55441	7.4999e-11	1.44171e-09
ARL4D	453.6	-0.88643	-0.92741	7.8451e-11	1.5061e-09
IGIP	203.7	1.21752	1.33633	7.9214e-11	1.51875e-09
KIF15	53.1	-1.7881	-2.27916	7.961e-11	1.52435e-09
IGF2R	18797.9	0.60171	0.61388	7.9926e-11	1.52841e-09
GPR137B	508	-0.86306	-0.90088	8.0425e-11	1.53594e-09
CMPK2	883.5	2.1508	4.79847	8.1555e-11	1.55549e-09
NXPH4	368.2	-0.99771	-1.06164	8.2068e-11	1.56323e-09
HPS1	4053	0.50994	0.51724	8.2403e-11	1.56571e-09
RP11-517I3.2	253	1.29403	1.43866	8.248e-11	1.56571e-09
ENO1	24201	-0.43591	-0.44044	8.2519e-11	1.56571e-09
APAF1	1055.3	0.74812	0.77165	8.2768e-11	1.56841e-09
CNIH3	264.9	1.0011	1.05904	8.293e-11	1.56945e-09
PLSCR4	1243.3	0.7309	0.75309	8.5259e-11	1.61079e-09
RAP1GDS1	2137.3	-0.83082	-0.86482	8.5334e-11	1.61079e-09
CRIM1	17763.2	0.73181	0.75404	8.6505e-11	1.63079e-09
ACTB	98717.1	-0.48449	-0.49073	8.7142e-11	1.64068e-09
LRP10	17455.2	0.46079	0.46617	8.964e-11	1.68555e-09
C6orf1	666.5	0.88626	0.92728	9.3892e-11	1.76223e-09
POLQ	41.3	-1.92086	-2.63172	9.3958e-11	1.76223e-09
TCP11L1	1004.3	0.70182	0.72142	9.5543e-11	1.78967e-09
GDE1	3745.4	0.47756	0.48358	9.7347e-11	1.82112e-09
CEP170B	2807.8	0.54985	0.55912	1.01545e-10	1.89518e-09
TAF13	1383.6	0.82544	0.85845	1.01564e-10	1.89518e-09
OCRL	1874	0.57828	0.58914	1.02299e-10	1.90645e-09
PFAS	788.8	-0.74153	-0.7651	1.02939e-10	1.91595e-09
SMYD3	624.5	-0.8123	-0.84452	1.0544e-10	1.96e-09
TPRG1L	3258.2	0.55901	0.56881	1.10363e-10	2.04705e-09
RPL10A	7785.4	-0.50406	-0.51123	1.10402e-10	2.04705e-09
PRPF38A	984.4	-0.64049	-0.655	1.11236e-10	2.05794e-09
MASP1	13942.4	0.55167	0.56108	1.1127e-10	2.05794e-09
PRSS3	209.4	1.28524	1.4234	1.13343e-10	2.09363e-09
SCARF2	2119.6	0.69569	0.71512	1.17427e-10	2.16634e-09
WTIP	1243	0.63016	0.64438	1.17983e-10	2.17385e-09
RRAD	56.1	1.72064	2.22034	1.20729e-10	2.22166e-09
ORAI2	3115.5	0.56282	0.57289	1.2128e-10	2.229e-09
IFI44	1941.3	1.80784	2.35906	1.21678e-10	2.2335e-09
POFUT2	2329.5	0.5842	0.5954	1.23803e-10	2.26967e-09
MSH2	448.9	-0.82309	-0.85424	1.24611e-10	2.28162e-09
KLHL20	1063.1	-0.63922	-0.65438	1.26138e-10	2.3067e-09
ACBD3	2696.2	0.64704	0.66257	1.26875e-10	2.31728e-09
DGKA	1422.8	0.63351	0.64798	1.34893e-10	2.46066e-09
B3GALT1	70.8	1.78017	2.29549	1.35212e-10	2.46341e-09
MCOLN1	756.6	0.6784	0.69671	1.3877e-10	2.52509e-09
KLF6	5935.4	0.82427	0.85771	1.40276e-10	2.54933e-09
MTHFD1	1451.5	-0.59018	-0.60176	1.4256e-10	2.58762e-09
GPAM	629.5	-0.93646	-0.98592	1.49805e-10	2.71576e-09
QSER1	1727.9	0.7274	0.74996	1.53011e-10	2.77047e-09
CENPE	187.4	-1.24988	-1.37342	1.54471e-10	2.79345e-09
MGAT1	8386.5	0.55311	0.56276	1.57146e-10	2.83832e-09
CAB39	3371.3	0.62116	0.63502	1.60915e-10	2.90281e-09
RIN2	1796.4	0.73702	0.76079	1.89242e-10	3.40961e-09
RP4-663N10.1	57.4	1.68333	2.144	1.9601e-10	3.52723e-09
MFSD1	3639.3	0.49028	0.49706	1.96741e-10	3.53332e-09
LCAT	410.6	0.86697	0.90605	1.96832e-10	3.53332e-09
EEA1	3156.1	0.65751	0.67415	1.97482e-10	3.54066e-09
DYRK3	826.6	0.77956	0.80825	2.04738e-10	3.66626e-09
ALCAM	6336.1	0.55854	0.56862	2.06537e-10	3.69396e-09
RNPEPL1	1810.6	0.58061	0.59188	2.08682e-10	3.72777e-09
PELO	1763.4	0.77502	0.80306	2.20552e-10	3.93502e-09
RIC1	4325.5	0.69078	0.71037	2.28675e-10	4.07498e-09
TFRC	9763	0.5287	0.53728	2.42266e-10	4.31177e-09
URB2	525.4	-0.80118	-0.8317	2.42552e-10	4.31177e-09
NOX4	116.1	-1.49466	-1.76828	2.43428e-10	4.3221e-09
XKR8	672.5	1.02687	1.09813	2.4828e-10	4.40292e-09
ATP2B4	18638.9	0.67437	0.69263	2.50109e-10	4.42998e-09
DOCK1	5652.1	0.45469	0.46012	2.59279e-10	4.58686e-09
RPL7L1	2272.1	0.57337	0.58454	2.59597e-10	4.58694e-09
SLC39A11	315.6	-0.91971	-0.96555	2.68394e-10	4.73667e-09
VSIR	2147.8	0.52447	0.53287	2.7366e-10	4.82379e-09
MICALL1	4353.1	0.56922	0.58009	2.74789e-10	4.83787e-09
N6AMT1	476.6	-1.02711	-1.09894	2.75364e-10	4.84217e-09
ZBTB21	1009.7	0.75397	0.77966	2.89395e-10	5.0828e-09
TAB3	1007.5	0.69553	0.71576	2.93205e-10	5.14356e-09
IGF2BP1	414.4	-0.8752	-0.91773	2.94185e-10	5.15456e-09
FANCE	157.5	-1.24101	-1.37953	3.05189e-10	5.34098e-09
TENM2	552.4	-0.91396	-0.96055	3.08543e-10	5.39325e-09
CNRIP1	1457.4	-0.59236	-0.60483	3.10947e-10	5.42879e-09
MIB2	1125.7	0.81379	0.84687	3.18146e-10	5.54786e-09
SLC36A1	2743.6	0.6452	0.66135	3.20845e-10	5.58211e-09
CCNF	206.6	-1.11879	-1.20792	3.20872e-10	5.58211e-09
LINC01397	437.8	-0.847	-0.88577	3.23579e-10	5.61813e-09
APOBEC3C	2894.6	0.64236	0.65822	3.2371e-10	5.61813e-09
VASN	12903.9	0.5865	0.59851	3.26087e-10	5.65269e-09
CARMN	347.3	-1.3711	-1.55974	3.30769e-10	5.72072e-09
KLF13	4613.7	0.46381	0.46964	3.30793e-10	5.72072e-09
RHEBL1	227	2.07725	4.09669	3.45243e-10	5.96358e-09
DPYD	2054.4	-0.77462	-0.80345	3.50727e-10	6.05118e-09
KIAA1644	2453.4	0.62287	0.63743	3.56491e-10	6.1434e-09
FGFR1OP	239.5	1.09456	1.18275	3.63215e-10	6.2519e-09
C4orf32	225.4	-1.23052	-1.37437	3.64718e-10	6.2704e-09
WHRN	129.3	1.30209	1.45757	3.73363e-10	6.41152e-09
PLCL2	470.6	0.882	0.92577	3.82383e-10	6.55873e-09
ADH1B	221.6	-1.23302	-1.37664	3.9919e-10	6.839e-09
GBP2	598.6	-1.0107	-1.08051	4.05641e-10	6.94139e-09
SNHG1	631.8	-0.72803	-0.75174	4.31226e-10	7.37059e-09
FKBP10	20562.1	0.51669	0.52492	4.37133e-10	7.46286e-09
DICER1	3126.3	-0.71464	-0.73731	4.42987e-10	7.55398e-09
PGF	604.5	0.92583	0.97756	4.43851e-10	7.55992e-09
GEM	1750	0.5478	0.55774	4.4547e-10	7.57867e-09
NFASC	3836	0.63743	0.65316	4.48941e-10	7.62887e-09
PGPEP1	786.5	0.88835	0.93378	4.64602e-10	7.88585e-09
RPS27L	4490.8	-0.51561	-0.52414	4.77264e-10	8.08712e-09
HTATIP2	1125.3	0.68666	0.70682	4.77564e-10	8.08712e-09
PTTG1	206.2	-1.2689	-1.40948	4.87522e-10	8.24622e-09
HPS3	980.2	0.68364	0.70336	4.91935e-10	8.31127e-09
EXOSC3	414.5	-0.85051	-0.8911	4.94153e-10	8.32965e-09
ARPP19	2923.6	0.57379	0.58523	4.94161e-10	8.32965e-09
AIMP2	1140.2	-0.59464	-0.60796	4.96089e-10	8.35254e-09
CYB5R3	18153.2	0.43536	0.44029	5.203e-10	8.75012e-09
HMGA2	6489.9	0.63568	0.65138	5.25974e-10	8.8354e-09
MALT1	2085.5	0.74807	0.77451	5.33469e-10	8.95104e-09
NOP14-AS1	563.9	-0.79102	-0.82181	5.36701e-10	8.99497e-09
RP11-983P16.4	97.1	-1.36848	-1.56501	5.40695e-10	9.05155e-09
CDCA5	100.9	-1.38708	-1.57127	5.48549e-10	9.17255e-09
DSCR3	2812.7	0.55269	0.56298	5.49829e-10	9.18346e-09
HMMR	46.6	-1.92474	-2.87657	5.507e-10	9.18753e-09
PLA2G4C	75.8	1.51641	1.79804	5.55167e-10	9.25151e-09
IFIH1	2801.4	2.00641	3.44002	5.57321e-10	9.27686e-09
NECTIN3	1858.2	0.67319	0.69207	5.60785e-10	9.32393e-09
PLEKHJ1	961.1	-0.67556	-0.69485	5.65579e-10	9.39297e-09
SYT14	322.7	1.02367	1.09535	5.66777e-10	9.4022e-09
PLEKHG1	193.5	1.15778	1.27239	5.69517e-10	9.43697e-09
NEMP2	232.9	-1.15486	-1.26479	5.76288e-10	9.53758e-09
KAZN	827.8	0.90936	0.95835	5.76891e-10	9.53758e-09
SH3BP4	4300.3	0.6275	0.64261	5.81803e-10	9.60794e-09
ANPEP	29005.1	0.49585	0.50325	6.26595e-10	1.0336e-08
LEPR	476.8	-0.79471	-0.82699	6.65453e-10	1.09646e-08
ATAD2	634	-0.7569	-0.78452	6.70097e-10	1.10287e-08
CCNK	2924.3	0.65211	0.6695	7.08549e-10	1.16485e-08
FOXF1	537.3	1.04451	1.12401	7.1778e-10	1.1787e-08
NEK2	26.6	-1.97141	-3.0345	7.21229e-10	1.18304e-08
CSRP1	11055.1	-0.64633	-0.66316	7.34124e-10	1.20285e-08
SLC25A3	13487.3	-0.45738	-0.46318	7.40475e-10	1.2119e-08
JAZF1	1242.5	-0.73321	-0.75926	7.45622e-10	1.21896e-08
TBK1	1109.2	0.67333	0.69248	7.61608e-10	1.24371e-08
TNIP1	4454.7	0.55033	0.56065	7.63835e-10	1.24595e-08
GOLIM4	5173.6	0.69357	0.71465	7.65915e-10	1.24796e-08
TUBB2A	928.3	-0.72485	-0.74904	7.69348e-10	1.25216e-08
ACVR2B	78.1	-1.50828	-1.81952	7.90567e-10	1.28526e-08
NRG1	2258.8	0.82197	0.85798	7.92444e-10	1.28689e-08
ATP6V1A	1669.1	0.72015	0.74397	7.9753e-10	1.29371e-08
MEX3C	2572.6	0.53917	0.549	8.56086e-10	1.38716e-08
INPP5D	51.5	1.8667	2.83216	8.78231e-10	1.42147e-08
LRRN3	820.7	1.91109	2.95981	8.79785e-10	1.42242e-08
ANKRD13B	245.9	0.94894	1.006	9.71666e-10	1.56924e-08
UFM1	3094	0.68314	0.7037	9.75472e-10	1.57365e-08
GPC6	1578.8	0.72336	0.74733	9.80549e-10	1.5801e-08
AKR1B10	71.6	1.49798	1.80373	9.88384e-10	1.59097e-08
THBS2	64359.8	0.72488	0.74954	9.92335e-10	1.59558e-08
PAICS	2669.4	-0.57173	-0.58362	1.00429e-09	1.61304e-08
CPNE5	59.6	-1.75964	-2.53376	1.01073e-09	1.6216e-08
F2R	2773	0.54777	0.55815	1.01322e-09	1.62381e-08
OXTR	4319.9	-0.47508	-0.4816	1.03134e-09	1.65104e-08
POLR2A	6162.7	-0.45552	-0.46138	1.04374e-09	1.66907e-08
TFPI	3043.3	0.61894	0.63414	1.04893e-09	1.67554e-08
MFHAS1	1143.4	0.62865	0.64437	1.08271e-09	1.72762e-08
ERCC6L	18	-2.00369	-3.89235	1.10722e-09	1.76387e-08
ACP1	1711	-0.55747	-0.56856	1.10784e-09	1.76387e-08
RHOBTB2	633.9	-0.70617	-0.72894	1.11891e-09	1.77957e-08
DDX58	5146.4	1.88723	2.83908	1.13254e-09	1.79929e-08
RORA	283.4	1.11548	1.21596	1.14211e-09	1.81253e-08
RASEF	101.5	1.60753	2.04367	1.14413e-09	1.81377e-08
AGAP1	812.5	0.7598	0.78835	1.1658e-09	1.84612e-08
MAFB	76.9	1.81274	2.66034	1.17048e-09	1.85153e-08
SLC36A4	496.7	0.77099	0.80158	1.18374e-09	1.87049e-08
HSPB1	9531.9	-0.52988	-0.53926	1.20446e-09	1.90118e-08
RAP2A	1115.8	0.74398	0.77108	1.21273e-09	1.91217e-08
CD44	32394.4	0.46839	0.47486	1.24045e-09	1.95377e-08
TOMM40L	547.1	-0.71962	-0.74385	1.26612e-09	1.99206e-08
CENPM	26.1	-1.95338	-3.33448	1.27082e-09	1.99731e-08
TMEM155	166.8	-1.14395	-1.25215	1.30569e-09	2.04992e-08
UNG	439.8	-0.7714	-0.80198	1.32704e-09	2.08121e-08
FGF5	1908.7	0.74483	0.77218	1.44953e-09	2.27089e-08
MCM10	21.4	-1.9595	-3.3369	1.46252e-09	2.28878e-08
C22orf39	361.6	-0.8607	-0.90556	1.54002e-09	2.4075e-08
FAM111B	15.6	-1.9936	-4.69308	1.54667e-09	2.41531e-08
SLC30A5	2759.9	0.54145	0.55168	1.55066e-09	2.41897e-08
EIF1AX	1089.2	0.67012	0.68999	1.55886e-09	2.42917e-08
CCDC90B	1595.6	0.62048	0.63605	1.56068e-09	2.42943e-08
ALDH1B1	1037.1	-0.64402	-0.66099	1.5803e-09	2.45628e-08
WWTR1	3918.6	0.70204	0.72488	1.58129e-09	2.45628e-08
AC093323.3	212.5	-1.10434	-1.20264	1.58972e-09	2.46676e-08
PEX11B	658.8	-0.72213	-0.74781	1.64721e-09	2.55327e-08
NATD1	790.3	-0.72244	-0.74795	1.7091e-09	2.64639e-08
LINC01503	292.8	-1.06113	-1.15803	1.72151e-09	2.66279e-08
FRMD5	94.8	1.46362	1.74175	1.74007e-09	2.68867e-08
RP4-673M15.1	55.5	-1.65338	-2.21707	1.74743e-09	2.69719e-08
BMP2	47.3	1.75262	2.38036	1.75416e-09	2.70216e-08
SEMA3D	1815.4	0.95926	1.02131	1.7558e-09	2.70216e-08
HINT1	3457.4	-0.48455	-0.49181	1.75618e-09	2.70216e-08
SAMD9	7071.9	1.72984	2.31961	1.83465e-09	2.81993e-08
CSF1	5173.7	0.59328	0.60703	1.90265e-09	2.92138e-08
DENND3	491.2	0.99751	1.06878	1.98888e-09	3.05059e-08
DENND5B	587.4	0.76757	0.79882	1.99203e-09	3.05222e-08
GUCY1B3	332.6	-0.94253	-1.00863	2.00807e-09	3.07358e-08
COMP	5093.7	-0.60979	-0.62468	2.024e-09	3.09474e-08
CLSTN1	8031.7	0.41035	0.41479	2.02646e-09	3.09526e-08
GIT1	1537.3	0.58882	0.60226	2.02895e-09	3.09584e-08
NONO	5842.1	-0.53304	-0.54301	2.0545e-09	3.13156e-08
RNF149	2118.6	1.32482	1.52307	2.07097e-09	3.15339e-08
PSAT1	8821.3	-0.51503	-0.52406	2.12695e-09	3.23526e-08
ALDH1A3	111.5	-1.30693	-1.50734	2.14414e-09	3.25802e-08
DDIAS	50.2	-1.62245	-2.04268	2.19665e-09	3.33435e-08
DPY19L1	1562.8	0.63095	0.64768	2.23335e-09	3.38656e-08
TOX	529.8	-1.09468	-1.19051	2.2516e-09	3.4107e-08
MYLIP	210.3	-1.13101	-1.26002	2.2542e-09	3.41111e-08
SEL1L3	2280.3	-0.73109	-0.75765	2.32189e-09	3.50665e-08
RASD2	94.6	-1.42747	-1.66989	2.32213e-09	3.50665e-08
ZBTB38	9030.6	0.54296	0.5535	2.34896e-09	3.54092e-08
TYMSOS	39.2	1.79638	2.54982	2.34965e-09	3.54092e-08
VPS41	2454.4	0.53044	0.54028	2.39696e-09	3.60849e-08
RAP2B	1600.8	0.55191	0.5631	2.40495e-09	3.61681e-08
THUMPD1	997.2	0.74622	0.77485	2.44743e-09	3.67692e-08
GOT1	2430.5	-0.59412	-0.60844	2.45926e-09	3.69091e-08
C2orf69	573.8	0.74332	0.77167	2.47157e-09	3.70558e-08
NAB1	769.6	0.72956	0.75569	2.50947e-09	3.75856e-08
ARIH1	3048.6	0.47604	0.48315	2.52454e-09	3.77727e-08
DCBLD1	4561.8	0.44801	0.45387	2.57176e-09	3.844e-08
SLC23A2	939.4	0.64712	0.6656	2.64014e-09	3.94217e-08
SLC26A2	875.7	-0.90346	-0.95559	2.76581e-09	4.12563e-08
CDCA2	85.2	-1.42945	-1.68142	2.777e-09	4.1381e-08
MX2	1923.6	1.88423	2.92518	2.83982e-09	4.22461e-08
CPXM1	1611.3	-0.56349	-0.57556	2.84082e-09	4.22461e-08
MAP4K5	3213.5	0.68212	0.70397	2.85815e-09	4.24606e-08
DDX60L	1500.1	0.95162	1.01514	2.8848e-09	4.28131e-08
SH3RF1	2843.5	0.75751	0.78796	3.14334e-09	4.66029e-08
PP7080	228.2	-1.00414	-1.07875	3.16483e-09	4.68741e-08
FANCD2	60.2	-1.55747	-1.90719	3.40819e-09	5.04274e-08
UST	1190.1	0.62913	0.64624	3.41914e-09	5.05219e-08
DCBLD2	6407.5	0.55583	0.56739	3.42147e-09	5.05219e-08
RAPGEF2	2310.8	0.68379	0.70588	3.45133e-09	5.09114e-08
LFNG	112.2	-1.37743	-1.61518	3.60379e-09	5.31069e-08
CNTRL	411	-0.79081	-0.82675	3.65178e-09	5.37601e-08
HIVEP2	3071.3	0.66206	0.68206	3.68973e-09	5.42642e-08
WDR62	60.8	-1.5117	-1.80314	3.69907e-09	5.43471e-08
NCS1	3829.1	0.68168	0.70371	3.82141e-09	5.60883e-08
SLC35F5	2836.2	0.53762	0.54816	3.82986e-09	5.6156e-08
ATP6AP2	6481.4	0.4471	0.45307	3.85875e-09	5.6523e-08
HEXB	7495	0.51049	0.5195	3.8893e-09	5.69135e-08
NDEL1	3243.7	0.56288	0.57503	4.01381e-09	5.86769e-08
IMPDH2	3674.2	-0.51572	-0.52504	4.03208e-09	5.88853e-08
NDUFA5	598.5	0.73497	0.76289	4.03619e-09	5.88866e-08
MBTPS1	7943.5	0.5211	0.53069	4.09636e-09	5.9705e-08
SLC7A7	173	-1.09163	-1.2032	4.11899e-09	5.99752e-08
POLR1E	725.7	-0.63451	-0.65216	4.14133e-09	6.02405e-08
HK2	3092.7	1.43339	1.71631	4.17901e-09	6.07283e-08
NLRP1	1888.3	0.54367	0.55458	4.23729e-09	6.15142e-08
ZBTB41	594.1	0.79101	0.82704	4.52454e-09	6.56192e-08
GAP43	66	1.45957	1.73496	4.57641e-09	6.63059e-08
CPED1	1535.5	0.63705	0.65517	4.66844e-09	6.75724e-08
TICRR	35.7	-1.81519	-2.72952	4.70398e-09	6.80196e-08
FAM214A	831.8	0.64064	0.65901	4.71386e-09	6.80953e-08
LINC00963	1438.7	0.57288	0.58588	4.7308e-09	6.82727e-08
GPNMB	34853.8	0.44918	0.45533	4.75919e-09	6.86148e-08
CDC42EP3	9444.7	0.71737	0.74345	4.77318e-09	6.87488e-08
IL17RB	117	1.26467	1.43385	4.83082e-09	6.95107e-08
SAPCD2	31.7	-1.85183	-2.72351	4.88072e-09	7.01598e-08
CHPF2	6742.8	0.51122	0.52036	5.00335e-09	7.1852e-08
C22orf29	939.7	-0.79299	-0.8283	5.11634e-09	7.34027e-08
BACE1	4728.7	0.51523	0.5246	5.26683e-09	7.54583e-08
STAT2	5975.6	0.54475	0.5559	5.26992e-09	7.54583e-08
TRIB1	441.7	1.04355	1.13194	5.33545e-09	7.63219e-08
SNX9	10743.8	0.77379	0.80741	5.35423e-09	7.65159e-08
ATF3	1656.8	1.89443	3.51863	5.47648e-09	7.81866e-08
CDADC1	234.7	1.03305	1.11994	5.69428e-09	8.11973e-08
ARFGAP2	2249.2	-0.47492	-0.48226	5.69845e-09	8.11973e-08
CNST	2114.5	0.56942	0.58226	5.75719e-09	8.19547e-08
MCM5	286.7	-1.02458	-1.10044	5.87518e-09	8.34951e-08
DGKI	2769.3	0.79648	0.83346	5.87681e-09	8.34951e-08
MAPKBP1	1545.6	0.54647	0.55781	5.94582e-09	8.43937e-08
KAZALD1	1604.6	-0.6881	-0.71111	6.01614e-09	8.53092e-08
RAB1A	7802	0.54588	0.55722	6.11803e-09	8.66701e-08
USP32	1694	0.60017	0.61525	6.16629e-09	8.72694e-08
MECR	485	-0.69785	-0.72196	6.21836e-09	8.79214e-08
DCAF4	579.6	-0.85251	-0.90081	6.50794e-09	9.19269e-08
ZNF79	427.5	0.76906	0.80244	6.59319e-09	9.30415e-08
KIF1C	9904.5	0.5475	0.55899	6.81069e-09	9.60183e-08
PGM2L1	715.1	0.87617	0.92633	6.93142e-09	9.76263e-08
RP11-513I15.6	47.7	1.59686	2.025	7.04567e-09	9.91402e-08
MAP2K3	3303.4	0.7795	0.81428	7.07118e-09	9.94037e-08
FLI1	445.4	0.77336	0.80701	7.16131e-09	1.00574e-07
DACT3	613.6	0.66902	0.69078	7.2135e-09	1.0121e-07
JPH2	460.3	-0.92267	-0.97996	7.25427e-09	1.01685e-07
RP13-1032I1.7	69.3	-1.54181	-1.94164	7.49274e-09	1.04927e-07
ZCCHC10	283.4	-0.92155	-0.98508	7.5261e-09	1.05294e-07
RYK	2181.6	0.51607	0.52578	7.53753e-09	1.05353e-07
ZMYM3	746.6	-0.80032	-0.83863	7.57858e-09	1.05826e-07
NOCT	395.2	1.15153	1.28299	7.69525e-09	1.073e-07
MELK	206.2	-1.14244	-1.27057	7.69881e-09	1.073e-07
MTX3	615.6	0.75955	0.79249	7.77493e-09	1.08258e-07
TMEM176B	309.8	-0.9405	-1.00581	7.82382e-09	1.08835e-07
UBE2Q1	3505.2	0.45532	0.46193	8.2066e-09	1.14052e-07
ZNF689	386.9	-0.82285	-0.86531	8.23358e-09	1.14318e-07
KIF18A	135.6	-1.22677	-1.38798	8.26278e-09	1.14615e-07
RFX7	1252.3	0.63088	0.64902	8.53925e-09	1.18338e-07
HGSNAT	3808.9	0.44546	0.45164	8.61611e-09	1.1929e-07
ERCC2	1724.6	-0.55737	-0.56934	8.70262e-09	1.20373e-07
ARID5A	1011.7	0.95744	1.02719	8.7108e-09	1.20373e-07
WDR26	6449.5	0.47625	0.48387	8.8087e-09	1.21611e-07
EBF3	266.5	0.98024	1.05172	9.09246e-09	1.25411e-07
HSD17B11	317.7	-0.88612	-0.9403	9.11887e-09	1.25657e-07
CHMP2B	2042.7	0.58186	0.5961	9.2384e-09	1.27184e-07
IL1RAP	863.3	0.98862	1.06859	9.2519e-09	1.2725e-07
TM9SF3	8904.6	0.50878	0.51816	9.4158e-09	1.29383e-07
SMC1A	2096.2	0.53055	0.54125	9.45109e-09	1.29747e-07
ETNK1	701.3	0.79285	0.83004	9.86442e-09	1.35294e-07
ATL1	342.6	0.77401	0.80756	1.02333e-08	1.40222e-07
MMP16	1047.2	0.76935	0.80329	1.02633e-08	1.40502e-07
TMEM159	579.2	0.76454	0.79829	1.03203e-08	1.41095e-07
PABPC4	4934.5	0.43986	0.44591	1.03259e-08	1.41095e-07
CDR2L	1739.1	0.7516	0.78322	1.03374e-08	1.4112e-07
TPT1-AS1	149.8	-1.09222	-1.20394	1.03585e-08	1.41277e-07
H2AFX	676.4	-0.6741	-0.69687	1.0429e-08	1.42106e-07
IGF1	97.7	-1.66078	-2.19291	1.05605e-08	1.43764e-07
ID4	400.1	-0.97163	-1.04222	1.06249e-08	1.44506e-07
SLC6A6	3552.4	0.52193	0.53216	1.07536e-08	1.46121e-07
PUM2	3119.6	0.49854	0.50743	1.08096e-08	1.46747e-07
MCU	997.2	-0.64709	-0.66659	1.09104e-08	1.47977e-07
CPS1	234.9	-1.04036	-1.13033	1.0941e-08	1.48256e-07
ASL	583.2	-0.78819	-0.82583	1.10066e-08	1.49007e-07
RAB28	455	0.71365	0.74062	1.12704e-08	1.52436e-07
HIST1H2BD	58.2	1.50453	1.89778	1.1343e-08	1.53277e-07
LINC00578	129.3	-1.19412	-1.35394	1.15134e-08	1.55437e-07
SECTM1	1916.1	0.94029	1.00719	1.1578e-08	1.56164e-07
AGAP2-AS1	618.3	0.67955	0.70276	1.23371e-08	1.66251e-07
PLEKHM2	6222	0.59271	0.608	1.24298e-08	1.67345e-07
MCM7	976.5	-0.68377	-0.70703	1.25444e-08	1.68733e-07
DNAJC27	265.6	-0.96962	-1.04765	1.3433e-08	1.8052e-07
RFC3	81.2	-1.38163	-1.64826	1.34582e-08	1.80692e-07
PI16	113.5	-1.30781	-1.49601	1.38474e-08	1.85747e-07
EML4	2299.9	-0.61616	-0.63398	1.38733e-08	1.85925e-07
CDC27	3439.1	0.65053	0.6712	1.40617e-08	1.88278e-07
NUPR1	5803.7	-0.49806	-0.50704	1.44116e-08	1.92786e-07
ROGDI	270	-0.85752	-0.90508	1.45856e-08	1.94937e-07
IL7R	2750.4	0.58493	0.59993	1.46697e-08	1.95881e-07
IFT20	1102.2	0.61812	0.63555	1.55711e-08	2.07728e-07
WDR45	1937.9	0.47934	0.4874	1.62401e-08	2.16456e-07
SYT7	212.1	1.05176	1.14672	1.66961e-08	2.22332e-07
STX17	748.1	-0.67737	-0.7025	1.676e-08	2.2298e-07
MTURN	584.9	0.6634	0.6855	1.71477e-08	2.27931e-07
TIPARP	4401.2	1.21425	1.37883	1.75735e-08	2.33379e-07
ALDH7A1	1085.7	-0.54542	-0.55736	1.76124e-08	2.33683e-07
HERC5	1835.2	1.86676	6.44633	1.7693e-08	2.3454e-07
MRVI1	2050.3	-0.58627	-0.60153	1.77939e-08	2.35665e-07
SLMAP	1972.6	0.50567	0.51524	1.79435e-08	2.37431e-07
PHF1	1000.9	0.55477	0.56744	1.82064e-08	2.40693e-07
ATP5B	15092.5	-0.42392	-0.42951	1.82661e-08	2.41264e-07
ATP2C1	5512.2	0.4574	0.46441	1.82998e-08	2.41492e-07
MAP3K4	1931.8	-0.61379	-0.6317	1.83769e-08	2.42211e-07
ASNS	4621	-0.5903	-0.60578	1.83874e-08	2.42211e-07
OAS2	2737.7	1.80716	2.8778	1.84563e-08	2.429e-07
CLDN1	92.7	1.38128	1.67421	1.92086e-08	2.5237e-07
IFNAR2	615	0.73139	0.76147	1.92103e-08	2.5237e-07
XYLT1	13564.1	0.77784	0.81467	1.92339e-08	2.52454e-07
PROSC	1285	0.50849	0.51827	1.96301e-08	2.57424e-07
ABHD17C	465.1	0.71187	0.73927	1.96979e-08	2.58082e-07
NAA40	499.7	-0.76758	-0.80309	1.97883e-08	2.59034e-07
GALNT11	785.7	-0.67986	-0.70331	1.99925e-08	2.61474e-07
ERLEC1	3726.7	0.55799	0.57102	2.02816e-08	2.65018e-07
PTK2	3604.2	0.65292	0.67431	2.04571e-08	2.67072e-07
MIR663AHG	82.6	-1.61026	-2.25988	2.07687e-08	2.709e-07
MARCKSL1	880.2	-0.64655	-0.66668	2.08903e-08	2.72243e-07
SLC5A3	1413.4	0.70849	0.73578	2.09142e-08	2.72312e-07
UNC13A	45	1.58238	2.01813	2.1273e-08	2.76738e-07
CDCA7	24.9	-1.82674	-3.1494	2.13507e-08	2.77503e-07
CCDC8	667.8	-0.79559	-0.8352	2.15229e-08	2.79493e-07
PLCXD3	143.8	1.2098	1.37696	2.16371e-08	2.80727e-07
SNX24	537.7	-0.72809	-0.7595	2.16907e-08	2.81173e-07
RRAS2	2180	0.4953	0.50442	2.20529e-08	2.85615e-07
ARHGAP24	1759.5	0.49601	0.50514	2.24993e-08	2.9114e-07
RNASEH2C	608.5	-0.62571	-0.64461	2.30485e-08	2.97983e-07
NR1H2	2354.5	0.53527	0.54686	2.35072e-08	3.03398e-07
MEGF8	5180.6	0.4447	0.45126	2.35088e-08	3.03398e-07
GINS2	32.5	-1.71773	-2.46599	2.35298e-08	3.03402e-07
OPCML	269.7	0.91609	0.98027	2.38471e-08	3.07223e-07
CLEC2B	244.3	0.95527	1.03104	2.40262e-08	3.09258e-07
RABGGTA	695.7	0.65954	0.68166	2.42382e-08	3.11713e-07
CHN1	3514.8	-0.48764	-0.49607	2.50498e-08	3.21771e-07
ADM	3075.4	-1.50533	-1.90461	2.50757e-08	3.21771e-07
SOCS3	1582.3	-0.80198	-0.84442	2.50862e-08	3.21771e-07
PTGIS	10358.3	0.60308	0.61988	2.51101e-08	3.21795e-07
UBL4B	895.6	-0.57623	-0.59098	2.56619e-08	3.2858e-07
EPHB1	61.9	1.41217	1.70141	2.60738e-08	3.33562e-07
ZFPM1	274.8	0.89644	0.95709	2.62034e-08	3.34927e-07
CLCN7	3824.7	0.49075	0.4997	2.63019e-08	3.35894e-07
SCAMP2	2274.3	0.45304	0.46003	2.63646e-08	3.36401e-07
ZNF512B	1728	-0.53712	-0.549	2.64359e-08	3.37018e-07
HMGB3	249.1	-0.94328	-1.01806	2.65325e-08	3.37955e-07
FAM196B	289	-0.86484	-0.91404	2.68239e-08	3.4137e-07
MCM3	787.3	-0.6058	-0.6231	2.77663e-08	3.53056e-07
FZD6	2010.5	-0.53878	-0.55086	2.80023e-08	3.55748e-07
TCAF1	799.1	-0.64575	-0.66693	2.83239e-08	3.59523e-07
ARFGEF2	3122.4	0.52131	0.53215	2.87676e-08	3.64838e-07
SPC25	13.7	-1.83408	-3.88563	2.88003e-08	3.64937e-07
OPTN	7037.7	0.60927	0.62683	2.92919e-08	3.70845e-07
RND3	17393.5	0.68344	0.70893	2.96121e-08	3.74575e-07
PDE12	588.1	-0.64416	-0.66653	3.05994e-08	3.86683e-07
TMEM87B	4522.7	0.47232	0.48034	3.06396e-08	3.86683e-07
SLC35B3	1530.2	0.53098	0.54252	3.06484e-08	3.86683e-07
SHMT2	8077	-0.4108	-0.41603	3.17115e-08	3.99751e-07
XPOT	10097.7	0.39949	0.40433	3.25235e-08	4.09632e-07
AXL	20063.9	0.49469	0.50396	3.25513e-08	4.09632e-07
LSM11	297	-0.94719	-1.0227	3.28454e-08	4.12979e-07
MOCOS	723.6	-0.7359	-0.77062	3.36686e-08	4.22965e-07
STARD4	2090.4	-0.62005	-0.63925	3.43383e-08	4.31009e-07
ZC3H12C	463.6	1.11217	1.24008	3.50568e-08	4.39651e-07
GALM	285.5	-0.91239	-0.98069	3.52598e-08	4.41818e-07
LOXL2	39436.6	0.37109	0.37497	3.55987e-08	4.45684e-07
HERC3	1361	0.53803	0.55009	3.58121e-08	4.47972e-07
ZMYND19	604.4	0.70391	0.73213	3.59576e-08	4.49408e-07
GNG12	11186.6	0.59492	0.61155	3.69865e-08	4.61874e-07
PTPN9	2301	-0.44322	-0.45	3.76635e-08	4.69928e-07
PGM3	5392.3	0.70438	0.73268	3.83682e-08	4.78313e-07
IFITM3	18623.3	-0.50435	-0.51436	3.85227e-08	4.79831e-07
CREB5	674.8	0.68445	0.71049	3.86344e-08	4.80813e-07
TMED3	3685	0.45006	0.45709	3.97561e-08	4.94352e-07
PSTPIP2	424.8	0.80342	0.84675	4.00097e-08	4.97084e-07
FUBP3	2350.3	0.56263	0.57669	4.02822e-08	5.00045e-07
ATP13A3	15056.1	1.13025	1.26688	4.07092e-08	5.04918e-07
DUSP4	103.6	1.57132	2.16919	4.0978e-08	5.07823e-07
SLC44A2	6276.3	0.48984	0.49896	4.1292e-08	5.11281e-07
TRIM59	276.6	-0.91359	-0.97893	4.1339e-08	5.1143e-07
ORC1	25.9	-1.73325	-2.68517	4.15471e-08	5.13572e-07
PJA2	4838.9	-0.48726	-0.49635	4.20215e-08	5.18998e-07
MX1	5838.3	1.8125	3.5171	4.23846e-08	5.23042e-07
FGF7	1963.2	-0.55863	-0.57292	4.42305e-08	5.4536e-07
SPC24	27.3	-1.74659	-2.82566	4.50745e-08	5.553e-07
PTGR1	1134	-0.63388	-0.65438	4.56539e-08	5.61965e-07
RSL24D1	1492.9	-0.58532	-0.60173	4.57974e-08	5.63258e-07
DMKN	856.7	-0.60371	-0.62186	4.59019e-08	5.6407e-07
FAM134A	3691.7	0.42012	0.42588	4.64005e-08	5.69719e-07
TRIM25	5123.5	0.75217	0.7879	4.7276e-08	5.79983e-07
CHAF1B	113.1	-1.20523	-1.38883	4.83794e-08	5.93022e-07
TRIM55	51.9	1.56471	2.08288	4.92605e-08	6.03317e-07
PARPBP	57.9	-1.47239	-1.89972	4.99575e-08	6.11343e-07
DUSP16	593.8	0.85729	0.91292	5.01596e-08	6.13303e-07
GNAQ	2034.1	0.64475	0.6668	5.07702e-08	6.20252e-07
FAM20A	789.5	-0.8291	-0.877	5.11958e-08	6.24929e-07
OGG1	600	-0.63797	-0.65878	5.14784e-08	6.27433e-07
ITPRIP	4495.4	0.69236	0.71959	5.14865e-08	6.27433e-07
BECN1	2882	0.46039	0.46807	5.15882e-08	6.28149e-07
LZTS2	4159.1	0.59119	0.60794	5.23428e-08	6.36808e-07
PPL	306.6	-0.87101	-0.9302	5.30353e-08	6.44698e-07
GBAS	953.8	-0.64271	-0.66462	5.32976e-08	6.4735e-07
TRAF3	2366.8	0.51002	0.52055	5.33584e-08	6.47551e-07
CREBRF	702	0.84887	0.90252	5.39926e-08	6.54704e-07
UBE2B	1401.8	0.51835	0.52955	5.40816e-08	6.55242e-07
S1PR3	5040.1	0.60575	0.62378	5.44335e-08	6.5896e-07
APC	2001.5	0.56146	0.57572	5.50519e-08	6.65897e-07
TMEM132B	257.5	0.90968	0.97414	5.57794e-08	6.7414e-07
RNASEH2A	128.7	-1.06577	-1.17054	5.77193e-08	6.97009e-07
ITGA8	173.4	1.02448	1.12616	5.80643e-08	7.00598e-07
STS	1447.3	0.58378	0.59998	5.81379e-08	7.00909e-07
CTNND1	8053.5	-0.41138	-0.4168	5.99298e-08	7.21918e-07
ETV7	204.6	1.28349	1.54306	6.12018e-08	7.36634e-07
LIPA	6445.4	0.74376	0.77811	6.13115e-08	7.37349e-07
ASCC3	6502.1	0.54919	0.5625	6.23195e-08	7.48857e-07
EID1	2678.9	0.72153	0.75327	6.25577e-08	7.51102e-07
ANKRD12	1329	0.66853	0.69351	6.3261e-08	7.58924e-07
RELB	870.8	0.82808	0.87699	6.40814e-08	7.68074e-07
KLHL2	565	0.68467	0.71155	6.41286e-08	7.68074e-07
MMP19	1006.2	-0.56328	-0.57746	6.43535e-08	7.70139e-07
FARP1	7735.6	0.5193	0.53058	6.49936e-08	7.77164e-07
ABCC4	1758.9	0.5439	0.55694	6.68916e-08	7.99207e-07
B4GAT1	719.2	0.64084	0.66246	6.84588e-08	8.17265e-07
RAPGEF1	3384.1	0.47085	0.47927	7.05182e-08	8.41166e-07
TMEM8A	4552.9	0.45137	0.45877	7.0577e-08	8.41181e-07
SELENOP	1064.8	-0.63158	-0.65323	7.15347e-08	8.51438e-07
TNRC6C	630.1	0.61921	0.63882	7.15538e-08	8.51438e-07
L3HYPDH	472.2	0.71806	0.74933	7.23804e-08	8.60575e-07
NLGN2	2202	0.54979	0.56338	7.33589e-08	8.71501e-07
RNF152	180.6	1.17714	1.3413	7.36985e-08	8.74826e-07
KIRREL3	1052	0.53531	0.54777	7.40401e-08	8.78169e-07
DES	423.6	-0.89938	-0.96443	7.74032e-08	9.17316e-07
ZNFX1	11220.1	1.35621	1.6488	7.75511e-08	9.18325e-07
BCL6	1746.3	0.70374	0.73373	7.94085e-08	9.3956e-07
KCTD1	280.6	0.82351	0.87204	7.95437e-08	9.404e-07
DLX2	70.2	-1.3536	-1.65861	8.10156e-08	9.57029e-07
LYST	1705.4	0.66948	0.69504	8.13436e-08	9.60129e-07
TMED4	1770.8	-0.46166	-0.46961	8.22254e-08	9.69756e-07
TBC1D22B	574.1	0.68959	0.71736	8.37198e-08	9.86587e-07
KIF20B	168.3	-1.03557	-1.14332	8.41572e-08	9.90944e-07
MARCH3	322.5	0.77132	0.81105	8.42792e-08	9.91584e-07
TTC19	727.6	-0.59695	-0.61504	8.47478e-08	9.96297e-07
ABCA1	1096.2	0.79771	0.84238	8.4968e-08	9.98084e-07
IDH3B	1412.6	-0.47931	-0.48833	8.54699e-08	1.00256e-06
USP33	2265.5	0.50196	0.51237	8.5486e-08	1.00256e-06
ZWINT	162.7	-1.09218	-1.21746	8.58813e-08	1.00639e-06
RHNO1	729.3	-0.58741	-0.60456	8.78155e-08	1.02824e-06
PKP4	1565.8	0.52248	0.53424	8.79453e-08	1.02893e-06
ADGRA3	986.1	0.60692	0.62572	8.88838e-08	1.03908e-06
NES	1824.1	-0.58496	-0.60105	8.9003e-08	1.03965e-06
AKR1C3	506.2	-0.70488	-0.73529	8.96531e-08	1.0464e-06
CORO2B	694.2	0.63846	0.66024	8.98223e-08	1.04755e-06
FEN1	340.5	-0.87816	-0.93783	9.03289e-08	1.05262e-06
DNAJC22	102.3	-1.23158	-1.43521	9.27621e-08	1.08011e-06
LATS1	1375.9	-0.55076	-0.56511	9.3371e-08	1.08634e-06
DYRK1B	546	0.62386	0.64418	9.63973e-08	1.12066e-06
CEP170	2159.4	0.68438	0.71203	9.68907e-08	1.1255e-06
SC5D	1259.6	0.6064	0.62563	9.851e-08	1.1434e-06
MAN1B1	4005.3	0.4223	0.42846	9.93815e-08	1.15203e-06
FOXM1	611.6	-0.65082	-0.67317	9.94103e-08	1.15203e-06
HS2ST1	617.3	-0.75744	-0.79793	9.98103e-08	1.15575e-06
RP5-1148A21.3	127	1.2379	1.47309	1.00852e-07	1.16688e-06
SPOCD1	2070.9	-0.52054	-0.53211	1.03334e-07	1.19466e-06
FANCA	76	-1.30894	-1.56702	1.03489e-07	1.19551e-06
SYNE2	241.4	-1.08591	-1.21308	1.03702e-07	1.19702e-06
TLDC1	2249	-0.50863	-0.51958	1.03955e-07	1.199e-06
C7orf50	1065.5	-0.54036	-0.55328	1.05645e-07	1.21754e-06
NFKBIE	351.8	0.74211	0.77728	1.06966e-07	1.23179e-06
TEK	375.2	0.83203	0.88276	1.08585e-07	1.24945e-06
RB1	2186.7	0.61707	0.63717	1.10717e-07	1.27298e-06
XRCC3	51.8	-1.52108	-2.05591	1.11467e-07	1.2806e-06
BEX4	783.1	0.60388	0.62273	1.12537e-07	1.29188e-06
LIMA1	7988.2	-0.58762	-0.60498	1.14372e-07	1.31192e-06
SYNJ2BP	843.9	-0.79707	-0.8446	1.15261e-07	1.32108e-06
DDIT3	2937.8	-0.50467	-0.51591	1.17162e-07	1.34182e-06
MKRN1	2384.8	0.48048	0.48981	1.21993e-07	1.39606e-06
CPEB3	133.6	1.28354	1.53813	1.22403e-07	1.39965e-06
MRPL42	844.6	-0.54911	-0.56378	1.23101e-07	1.40654e-06
NAGA	1734.9	-0.48587	-0.4956	1.23822e-07	1.41367e-06
DENND6A	450.8	-0.68754	-0.71879	1.26614e-07	1.44442e-06
SLC38A11	124.4	1.0682	1.19101	1.2977e-07	1.47927e-06
GPT2	892.8	-0.71542	-0.74826	1.31242e-07	1.49489e-06
UBE2E1	1870.8	-0.48802	-0.49843	1.33634e-07	1.52096e-06
IGDCC4	846.8	0.58087	0.59797	1.33896e-07	1.52209e-06
ZDHHC21	452.4	0.72421	0.75861	1.33941e-07	1.52209e-06
KANK2	6512.1	-0.41946	-0.42564	1.3407e-07	1.52237e-06
CSRP2	1543.7	-0.71254	-0.7449	1.35426e-07	1.53658e-06
TUBB	32420.4	-0.54536	-0.55925	1.38558e-07	1.57043e-06
HARS2	799.5	-0.54502	-0.55873	1.38624e-07	1.57043e-06
SCUBE3	659.2	-0.82204	-0.87054	1.39014e-07	1.57363e-06
MXRA8	16043.3	0.53731	0.55062	1.40814e-07	1.59223e-06
ZCCHC6	1518.6	0.63914	0.66184	1.40875e-07	1.59223e-06
ARHGAP10	1366.4	0.53242	0.54529	1.41025e-07	1.5927e-06
PDLIM7	8562.7	-0.47034	-0.47911	1.41471e-07	1.59651e-06
NINJ1	1549.4	0.55793	0.57286	1.42813e-07	1.61041e-06
PTMA	2139.2	-0.45423	-0.46213	1.4431e-07	1.62604e-06
AGRN	9995.3	0.43445	0.44137	1.45178e-07	1.63456e-06
MADD	1827.3	0.47277	0.4817	1.47052e-07	1.65439e-06
EPHB3	411.1	-0.80745	-0.85371	1.4729e-07	1.65579e-06
ATP1A1	16450.6	0.43198	0.43878	1.48413e-07	1.66714e-06
COL5A2	74527.4	-0.57201	-0.58819	1.49427e-07	1.67724e-06
SMAD1	511.9	-0.69226	-0.7233	1.50279e-07	1.68552e-06
ADRA1D	132.1	1.1521	1.32351	1.50762e-07	1.68964e-06
KLHL15	311.7	-0.87121	-0.93579	1.52432e-07	1.70705e-06
GPI	3683.9	-0.42437	-0.43083	1.54721e-07	1.73136e-06
TNXB	9314.5	0.64889	0.67309	1.55091e-07	1.73418e-06
SYNE3	808.4	0.74854	0.78658	1.56429e-07	1.7478e-06
EDEM1	2210.8	0.55552	0.57038	1.59316e-07	1.7787e-06
EOGT	1147.8	0.6642	0.68998	1.59672e-07	1.78132e-06
ADH5	5571.1	-0.44788	-0.45563	1.62919e-07	1.81617e-06
AARD	179	-1.08593	-1.20702	1.65839e-07	1.84731e-06
RAB23	2835.3	-0.50813	-0.51957	1.66783e-07	1.85641e-06
HECW1	170.3	0.97835	1.06719	1.67384e-07	1.86169e-06
TRIP11	2222.3	0.46661	0.47533	1.69382e-07	1.88248e-06
GPAT4	3384	0.41939	0.42566	1.70349e-07	1.8918e-06
KRT7	4047	-0.65001	-0.67407	1.72509e-07	1.91433e-06
KCTD15	1657.6	-0.57855	-0.59564	1.73388e-07	1.92262e-06
EIF4E2	3009.6	0.52441	0.53692	1.73811e-07	1.92586e-06
SERPINF1	6310.9	-0.43832	-0.44556	1.741e-07	1.9276e-06
MARVELD1	4133.4	0.41008	0.41595	1.76519e-07	1.95291e-06
SNHG15	367.6	-0.76141	-0.80289	1.77857e-07	1.96622e-06
APEX1	4366	-0.40217	-0.40771	1.78736e-07	1.97445e-06
ATG4A	483.6	0.62585	0.64754	1.81526e-07	2.00376e-06
BRI3	3490.5	0.45648	0.46468	1.83711e-07	2.02635e-06
MAPRE2	1068.2	-0.54534	-0.55969	1.83955e-07	2.02752e-06
GMFB	1890.5	0.63853	0.66148	1.85197e-07	2.03967e-06
THEMIS2	850.9	1.6869	2.96764	1.88416e-07	2.07356e-06
DCPS	478.2	-0.66937	-0.69722	1.90438e-07	2.09273e-06
AJUBA	1716.1	-0.6862	-0.71598	1.90443e-07	2.09273e-06
SUGCT	240.5	0.84362	0.90118	1.9247e-07	2.11341e-06
HOOK3	1920.8	0.68574	0.71492	1.95275e-07	2.14261e-06
C1orf109	455.5	0.69122	0.72141	1.95681e-07	2.14546e-06
TLE4	2224.1	0.42691	0.43359	1.97987e-07	2.16864e-06
PATZ1	540.8	-0.6829	-0.71143	1.98091e-07	2.16864e-06
ABCC3	1819.3	-0.5653	-0.58126	1.99888e-07	2.18661e-06
ANKRD29	625.5	0.60007	0.61935	2.00031e-07	2.18661e-06
CLU	6907.4	0.44917	0.45701	2.00853e-07	2.19396e-06
RAB27A	700.8	-0.61994	-0.64203	2.02569e-07	2.21105e-06
GGH	276.7	-0.97477	-1.06842	2.02883e-07	2.21283e-06
ZFAND5	5195.1	0.52076	0.53317	2.04989e-07	2.23413e-06
YPEL3	454.2	0.7657	0.80647	2.12126e-07	2.3102e-06
PSMC3	3602.8	-0.4543	-0.46246	2.12598e-07	2.31362e-06
MT1F	11.1	-1.69508	-3.7816	2.14157e-07	2.32886e-06
STK4	1619.9	-0.49964	-0.51087	2.1458e-07	2.33173e-06
CTH	228.3	-0.89921	-0.9748	2.17351e-07	2.36009e-06
TRPV2	672.2	-0.694	-0.72474	2.17661e-07	2.36171e-06
TUBA1A	6711.4	-0.44686	-0.45462	2.20383e-07	2.38947e-06
CCL5	126.7	1.6781	3.53064	2.23696e-07	2.42359e-06
CERK	3129.9	0.41943	0.42589	2.35441e-07	2.54896e-06
TIMELESS	404.7	-0.67566	-0.70272	2.3634e-07	2.55555e-06
SLC7A14	100.1	1.2915	1.53532	2.36399e-07	2.55555e-06
TRAF7	3655.5	0.4035	0.40921	2.39262e-07	2.58459e-06
AK3	2443.8	0.47341	0.48276	2.39636e-07	2.58673e-06
CFAP36	1018.9	0.50254	0.51372	2.40856e-07	2.59798e-06
VPS36	1064.8	-0.49619	-0.50768	2.41193e-07	2.5997e-06
SDC1	1307.5	0.59947	0.61829	2.41691e-07	2.60316e-06
OGFR	2040.4	0.68931	0.71985	2.50735e-07	2.69858e-06
CDC25A	127.4	-1.05134	-1.18329	2.55728e-07	2.7503e-06
IRF7	777.3	1.36309	1.70164	2.58738e-07	2.78062e-06
TMEM176A	194.7	-0.95485	-1.0429	2.63154e-07	2.82602e-06
PCGF3	1973.5	0.42824	0.43515	2.64254e-07	2.83575e-06
ZFP91	3545.8	0.4706	0.47985	2.6482e-07	2.83974e-06
SLC26A11	482.8	-0.77057	-0.81942	2.65409e-07	2.84397e-06
ARHGEF7	2027.8	0.45025	0.45832	2.75563e-07	2.95062e-06
EXT1	16770.3	0.59593	0.61523	2.79701e-07	2.99274e-06
ZBTB7A	2266.5	0.5258	0.53892	2.81692e-07	3.01184e-06
FJX1	677.7	0.6032	0.62288	2.83644e-07	3.0305e-06
SKA1	25.4	-1.64022	-2.51933	2.86628e-07	3.06015e-06
BARD1	117.9	-1.1705	-1.36274	2.90075e-07	3.0947e-06
ELP2	2824.2	0.44335	0.45109	2.91276e-07	3.10525e-06
IRF2BP2	2494.8	0.51893	0.53162	2.95269e-07	3.14552e-06
CLOCK	2361.3	0.50582	0.51747	2.95994e-07	3.15096e-06
MSMO1	3508.7	0.5288	0.5422	2.97567e-07	3.16541e-06
CANT1	2816.2	0.4455	0.45335	2.99669e-07	3.18545e-06
CEBPD	1295.7	-1.19154	-1.3938	3.03203e-07	3.22067e-06
SLC20A2	1986.9	-0.67907	-0.70809	3.19883e-07	3.3954e-06
OASL	3593.1	1.69541	7.58968	3.24832e-07	3.44543e-06
C19orf66	1527.2	0.63027	0.65354	3.29197e-07	3.4892e-06
IMPA1	322.7	-0.73984	-0.77609	3.3168e-07	3.51298e-06
TUBA1B	10323.3	-0.51199	-0.52416	3.32143e-07	3.51534e-06
LRPAP1	4229.2	0.44876	0.45689	3.3555e-07	3.54883e-06
FAM234A	2198.1	0.41143	0.41764	3.36599e-07	3.55736e-06
ABI3BP	4490.9	0.3888	0.39402	3.40249e-07	3.59335e-06
ARSK	358.8	0.75694	0.79943	3.40716e-07	3.59568e-06
RP11-121P12.1	69.2	-1.3207	-1.63053	3.45774e-07	3.64643e-06
ELF2	986.3	-0.55832	-0.57457	3.48362e-07	3.67108e-06
CNOT7	1784.8	0.50364	0.51524	3.49223e-07	3.67751e-06
GNG5	1963.9	0.50007	0.51151	3.4987e-07	3.68167e-06
TPD52L2	7183.6	0.37257	0.37717	3.50569e-07	3.68638e-06
CXCL9	38.2	1.68217	6.39876	3.51481e-07	3.69333e-06
L3MBTL3	508.2	0.63646	0.66065	3.54024e-07	3.71738e-06
PPP1R3F	197.8	0.89523	0.9676	3.66466e-07	3.84527e-06
TSC22D2	1173	-0.60039	-0.6209	3.75168e-07	3.93376e-06
NR1H3	275.9	-0.82777	-0.8837	3.82793e-07	4.01084e-06
YWHAG	9562.8	0.53535	0.54957	3.83645e-07	4.0169e-06
MAIP1	376	-0.75788	-0.80301	3.84847e-07	4.0266e-06
SYNJ2	4918.8	0.59289	0.61233	3.8831e-07	4.05994e-06
MARCH8	1498.7	0.44582	0.45388	3.89331e-07	4.0677e-06
MYO6	1755.8	0.51696	0.52977	3.92471e-07	4.09759e-06
PPP2R5B	838.6	0.62448	0.64731	3.97858e-07	4.15087e-06
ITGA5	40470.7	0.46756	0.4769	3.98737e-07	4.15708e-06
RP4-794I6.4	64.4	1.36163	1.71705	4.02839e-07	4.19687e-06
TMEM104	1871.2	0.48149	0.49167	4.03455e-07	4.20029e-06
TMEM140	688.5	0.94815	1.04151	4.04081e-07	4.20382e-06
GRK5	1304.6	0.66135	0.68874	4.04727e-07	4.20755e-06
NBN	1975.1	-0.56804	-0.58558	4.05487e-07	4.21247e-06
KANSL3	1980.3	-0.42007	-0.42675	4.13822e-07	4.296e-06
NSMF	2157.9	0.47628	0.48622	4.1442e-07	4.29917e-06
EPHA4	902.5	0.69544	0.7281	4.14788e-07	4.29994e-06
JAG1	936.5	0.6075	0.62878	4.20046e-07	4.34986e-06
H1FX	931.7	-0.62259	-0.64637	4.20198e-07	4.34986e-06
IRS2	2009.4	0.50686	0.51887	4.25823e-07	4.40498e-06
SNHG8	1390.9	-0.48385	-0.49461	4.27367e-07	4.41783e-06
TOR1A	2209.4	0.55502	0.57105	4.345e-07	4.48841e-06
PPIL1	1285.2	-0.47726	-0.4871	4.39831e-07	4.54027e-06
RP11-399O19.9	94.4	1.1921	1.41177	4.40452e-07	4.5414e-06
RPSAP52	562.1	0.91258	0.99291	4.4056e-07	4.5414e-06
ZNF260	599.8	-0.61133	-0.63319	4.41938e-07	4.5524e-06
ATP8B4	114.6	-1.14239	-1.36115	4.43349e-07	4.56372e-06
MED20	741.1	-0.69838	-0.73145	4.54515e-07	4.67306e-06
CENPV	50	-1.39459	-1.76629	4.54608e-07	4.67306e-06
TMEM106A	397.8	-0.7399	-0.77946	4.57639e-07	4.7009e-06
RAP1GAP2	271.7	0.91404	0.99234	4.64432e-07	4.76734e-06
SQLE	3560.6	0.63552	0.65999	4.6573e-07	4.77732e-06
IP6K1	1808	-0.54308	-0.55825	4.67092e-07	4.78499e-06
CNGA3	17	1.67294	3.83911	4.67131e-07	4.78499e-06
MSRB1	538.7	-0.62998	-0.65276	4.67839e-07	4.78889e-06
TICAM1	718	0.60938	0.63111	4.75086e-07	4.85968e-06
PANK1	268.9	0.82563	0.88456	4.77266e-07	4.87857e-06
WISP2	281.6	-0.81157	-0.87724	4.79515e-07	4.89814e-06
JOSD1	2913.7	0.48106	0.49143	4.82419e-07	4.92437e-06
NFYB	740.7	-0.54669	-0.56226	4.93984e-07	5.03891e-06
EPS8L2	1407.5	0.61532	0.63766	4.95588e-07	5.05175e-06
TMEM243	649.3	0.64847	0.67487	5.03534e-07	5.12919e-06
NUAK1	1002.4	-0.56554	-0.58244	5.07703e-07	5.16805e-06
C7orf43	743.4	0.60833	0.63017	5.1053e-07	5.19322e-06
C5orf15	2113.5	0.57087	0.58864	5.13674e-07	5.22158e-06
MIR99AHG	170.8	-1.1015	-1.26545	5.27294e-07	5.35631e-06
CLIC3	65	-1.25537	-1.50335	5.33933e-07	5.41999e-06
TNFSF10	232.4	1.57471	2.96685	5.36283e-07	5.44008e-06
RP11-399B17.1	89.3	1.13638	1.2966	5.36977e-07	5.44335e-06
PEX19	1526.3	-0.43666	-0.4448	5.43791e-07	5.50862e-06
MGAT4B	8471.7	0.38013	0.38522	5.44915e-07	5.51618e-06
PANX1	2376.9	0.77892	0.82747	5.50806e-07	5.57196e-06
CASC4	4651.1	0.46833	0.47795	5.59121e-07	5.65218e-06
CDCA4	257.6	-0.82532	-0.88361	5.61357e-07	5.67087e-06
MREG	55	-1.38555	-1.90579	5.7171e-07	5.77147e-06
DHX58	936.4	0.79288	0.84337	5.7301e-07	5.78061e-06
RBM14	1273.2	-0.53321	-0.54765	5.74979e-07	5.79648e-06
PNRC2	1062.2	0.51202	0.52489	5.75567e-07	5.79842e-06
LOXL1-AS1	455.4	-0.65439	-0.6817	5.81199e-07	5.85113e-06
PDE5A	1800.3	-0.70996	-0.74638	5.9326e-07	5.96846e-06
SLC41A2	1041.9	0.69439	0.72767	6.05916e-07	6.09159e-06
CDKN1B	1049.3	-0.55935	-0.57675	6.24846e-07	6.2776e-06
ZSWIM8	3138.6	0.50935	0.52192	6.29961e-07	6.32465e-06
BRI3BP	113.9	-1.12216	-1.28285	6.33138e-07	6.3522e-06
KIAA1217	506.7	0.63481	0.66033	6.36267e-07	6.37922e-06
SREBF1	1548.6	-0.62695	-0.65148	6.4285e-07	6.44081e-06
MAB21L1	1141	-0.68254	-0.71395	6.48472e-07	6.4927e-06
SNCAIP	338.2	0.78509	0.83453	6.51434e-07	6.5179e-06
ZDHHC9	2750.9	0.53465	0.54932	6.65897e-07	6.65457e-06
PRKY	458.7	0.62292	0.64694	6.66002e-07	6.65457e-06
HSDL1	546.9	-0.57869	-0.59821	6.70148e-07	6.69143e-06
NCOA3	3161.9	0.51959	0.53314	6.93399e-07	6.91888e-06
GINS4	78.1	-1.18624	-1.38917	6.95066e-07	6.93079e-06
SCAP	1889.1	0.45359	0.46243	7.01396e-07	6.98915e-06
ZBTB47	3516.8	0.43893	0.44698	7.02718e-07	6.99756e-06
PTPRF	2526.6	0.46123	0.4705	7.15429e-07	7.1193e-06
RP4-591C20.9	232.2	-0.88611	-0.9621	7.17345e-07	7.13352e-06
GNA12	5744.5	0.41337	0.42007	7.1816e-07	7.13677e-06
C2CD2	1924.4	0.57105	0.58937	7.25374e-07	7.20358e-06
DNAJC10	5498.9	-0.44938	-0.45811	7.26723e-07	7.21208e-06
THAP9-AS1	504.8	0.62636	0.65128	7.31158e-07	7.25118e-06
CDH8	17.5	1.6446	3.39407	7.39145e-07	7.32497e-06
NNMT	9003.1	-0.52061	-0.5343	7.39598e-07	7.32497e-06
SYDE2	203.6	-0.86484	-0.93307	7.42324e-07	7.347e-06
MTHFD2	7487.7	-0.50126	-0.5135	7.43233e-07	7.35103e-06
IL13RA2	269.3	0.90847	0.99221	7.55034e-07	7.46271e-06
PNRC1	1056.5	0.55308	0.56977	7.59976e-07	7.50649e-06
LARP4	1254.3	-0.63363	-0.65973	7.61025e-07	7.51179e-06
C5orf30	760.3	0.62607	0.64993	7.61874e-07	7.51499e-06
TCF7	685.8	0.7995	0.85283	7.62417e-07	7.51499e-06
URB1	2173.1	-0.49029	-0.50184	7.62888e-07	7.51499e-06
TWSG1	3304.5	-0.5208	-0.53459	7.76549e-07	7.64442e-06
IFNB1	64.1	1.63741	6.12889	7.86047e-07	7.73272e-06
COG6	1686.1	0.45464	0.46364	7.90301e-07	7.76935e-06
IPMK	186.8	0.88868	0.96742	8.03229e-07	7.89114e-06
OAS1	1130.3	1.64033	3.49716	8.09546e-07	7.94788e-06
PIGA	224.9	-0.96029	-1.06209	8.14871e-07	7.9948e-06
DNAJC16	795.1	0.53131	0.54582	8.28704e-07	8.12507e-06
MED22	1026.7	-0.53802	-0.55302	8.31206e-07	8.14415e-06
UHRF1BP1L	2060.2	0.57822	0.5975	8.32603e-07	8.15238e-06
ARHGAP18	2088.6	0.54101	0.5566	8.34788e-07	8.16832e-06
TXN	6631.5	0.40637	0.41282	8.37216e-07	8.18257e-06
IDE	1440.3	0.5016	0.51402	8.37362e-07	8.18257e-06
AP1S2	471.8	0.68937	0.72277	8.39678e-07	8.19974e-06
ADGRL2	1240.4	0.54628	0.56248	8.45979e-07	8.25576e-06
CCNE2	21.3	-1.6176	-2.72082	8.48325e-07	8.27315e-06
RBL1	128.4	-1.09352	-1.24745	8.56603e-07	8.34832e-06
HDAC5	2375.9	0.53987	0.55544	8.61021e-07	8.3858e-06
HMG20A	1121.7	-0.51105	-0.52411	8.71909e-07	8.48619e-06
HEXIM1	1113.9	-0.57024	-0.5884	8.74589e-07	8.50662e-06
NEK7	9420.9	-0.54272	-0.55871	8.75403e-07	8.5089e-06
TTC7B	854.7	0.52442	0.53863	8.7937e-07	8.54179e-06
ALDH3A2	732.3	-0.61556	-0.64015	8.84423e-07	8.58518e-06
PML	3129.2	0.65289	0.68132	8.8517e-07	8.58673e-06
DIXDC1	1519.6	-0.50606	-0.51842	8.96195e-07	8.68793e-06
PELI1	264.2	0.91212	0.99999	9.00272e-07	8.72168e-06
KCNK6	1538.4	0.59234	0.61301	9.17191e-07	8.87972e-06
SLC35D1	1377.2	-0.53817	-0.55367	9.19499e-07	8.89618e-06
ABHD5	1164.5	0.54176	0.55772	9.2028e-07	8.89786e-06
BOK	1230.4	-0.56446	-0.58183	9.53151e-07	9.20386e-06
SLC7A1	5650.5	-0.43162	-0.43925	9.53185e-07	9.20386e-06
TDRP	144.3	0.92969	1.02435	9.79526e-07	9.45197e-06
YIPF5	5513.6	0.41211	0.41891	9.80289e-07	9.45311e-06
DNAJB4	1383.4	0.49267	0.50446	9.90844e-07	9.54861e-06
POMGNT1	2575.1	0.41178	0.41857	1.01094e-06	9.73506e-06
TBX3	6154.4	0.48091	0.49192	1.01152e-06	9.73506e-06
EHD1	4992.7	-0.46333	-0.47305	1.01428e-06	9.75523e-06
CD58	250.7	0.86888	0.94101	1.01564e-06	9.7619e-06
SLC35E4	283	0.74193	0.78532	1.02176e-06	9.81427e-06
ESYT1	6050	-0.38843	-0.3941	1.0242e-06	9.83124e-06
LAMC2	382.4	0.73503	0.77626	1.04944e-06	1.00669e-05
TRAFD1	1652.4	-0.78116	-0.83446	1.05113e-06	1.00754e-05
MATN3	66.3	-1.27454	-1.53272	1.0517e-06	1.00754e-05
ZNF654	794	0.61261	0.63647	1.07013e-06	1.0243e-05
NUP58	1602.3	0.52116	0.53544	1.07059e-06	1.0243e-05
TIAM2	226.9	-0.80896	-0.86853	1.07444e-06	1.02691e-05
MAP2K6	95.9	-1.20963	-1.51598	1.07472e-06	1.02691e-05
DIEXF	2259.5	0.51122	0.52457	1.07619e-06	1.02764e-05
PNKD	650.4	-0.57302	-0.59166	1.08132e-06	1.03187e-05
PPP2R5A	1268.8	0.5544	0.57184	1.09359e-06	1.0429e-05
AMPD3	418.9	0.71389	0.75332	1.09686e-06	1.04533e-05
ZNF106	4174	0.51036	0.52368	1.10832e-06	1.05557e-05
AFF3	1090.4	-0.53524	-0.55025	1.1135e-06	1.05982e-05
SLC35E1	2764.9	0.53456	0.54991	1.12027e-06	1.06557e-05
CMTM3	1436.9	0.4777	0.48841	1.12175e-06	1.06628e-05
RGS7	50.8	1.34943	1.7198	1.1409e-06	1.08378e-05
MMP2	116470	0.49695	0.50925	1.15449e-06	1.09598e-05
KRT19	854.2	0.74156	0.78416	1.16886e-06	1.1089e-05
DNAJC9	223.9	-0.86285	-0.93373	1.17037e-06	1.10962e-05
SNHG7	390.4	-0.66857	-0.70015	1.17375e-06	1.1121e-05
LZTFL1	791.6	0.51097	0.52442	1.1768e-06	1.11427e-05
STXBP3	1237.3	0.48337	0.49469	1.18948e-06	1.12555e-05
SH3YL1	403.5	0.66745	0.6987	1.22482e-06	1.15824e-05
SRGAP2	1226.5	0.51835	0.53251	1.22981e-06	1.16221e-05
SPTBN1	5520.3	0.48511	0.49659	1.2311e-06	1.16268e-05
VAT1L	304.1	0.93216	1.02283	1.24676e-06	1.17671e-05
AFDN	1130.6	0.50536	0.51847	1.24822e-06	1.17733e-05
GABBR2	693	0.61668	0.6406	1.25318e-06	1.18124e-05
HIPK3	3282	-0.60172	-0.62451	1.25419e-06	1.18144e-05
FAM120C	356.5	-0.84222	-0.9094	1.26858e-06	1.19423e-05
RECQL4	96.4	-1.07502	-1.22235	1.27521e-06	1.19958e-05
ISG20	417.5	1.56854	2.66912	1.27591e-06	1.19958e-05
FGD5-AS1	3592.7	0.41122	0.4181	1.28123e-06	1.20382e-05
ST3GAL5	210.9	-0.84932	-0.91898	1.28511e-06	1.20668e-05
MAVS	3931.6	0.43299	0.44112	1.28623e-06	1.20691e-05
PLPPR2	2398.3	0.41275	0.41974	1.287e-06	1.20691e-05
RCN1	8642.4	0.39959	0.40595	1.30763e-06	1.22547e-05
FLNA	129560	-0.5168	-0.53082	1.31806e-06	1.23441e-05
PAK1	1212.1	0.45607	0.46559	1.31885e-06	1.23441e-05
ZNF614	450.3	-0.66438	-0.69652	1.32292e-06	1.23743e-05
ALPK1	529	-0.68794	-0.72336	1.33098e-06	1.24417e-05
TNFAIP6	1021.4	-0.67439	-0.70849	1.33699e-06	1.24899e-05
GLT8D1	3045.8	0.39861	0.40493	1.34289e-06	1.25371e-05
CORO6	160.2	0.97799	1.0878	1.35017e-06	1.2597e-05
LL22NC03-86G7.1	159.2	-0.99908	-1.11869	1.35181e-06	1.26042e-05
SDC3	7026.3	0.39345	0.39952	1.36005e-06	1.2673e-05
ADAM12	17626.9	0.54911	0.56616	1.36921e-06	1.27503e-05
STAC	498.9	0.74167	0.78509	1.37922e-06	1.28353e-05
SEPHS2	1988.1	-0.46389	-0.47384	1.38099e-06	1.28437e-05
CALU	62593	0.45462	0.46411	1.39396e-06	1.2956e-05
DIAPH3	257.1	-0.79047	-0.84455	1.41267e-06	1.31216e-05
EFNB2	1030.4	-0.54731	-0.56387	1.43005e-06	1.32747e-05
SH3GLB1	5583	0.58283	0.60352	1.43879e-06	1.33473e-05
HSPA2	607.4	-0.67142	-0.70256	1.45088e-06	1.34509e-05
FGFBP2	18.3	-1.59664	-3.59762	1.45864e-06	1.35144e-05
SLC30A1	2123.2	0.48781	0.4998	1.47782e-06	1.36834e-05
PPP3CC	997	0.76633	0.81654	1.4979e-06	1.38538e-05
ZNF93	95.9	-1.11272	-1.2847	1.49812e-06	1.38538e-05
KCTD20	5280.8	-0.5345	-0.5504	1.5084e-06	1.39401e-05
BRCA1	117.6	-1.0551	-1.19681	1.50943e-06	1.39408e-05
MIEN1	1093.7	0.4971	0.50965	1.52588e-06	1.40839e-05
SPG21	3113.3	0.38819	0.39409	1.55047e-06	1.43018e-05
PTEN	2309.1	0.47553	0.48661	1.56805e-06	1.44548e-05
CTB-25B13.12	191.2	0.83488	0.9014	1.59938e-06	1.47344e-05
PRUNE1	497.2	-0.60497	-0.62836	1.6105e-06	1.48275e-05
KPNA3	2519.8	0.50198	0.51518	1.68591e-06	1.5512e-05
SCN2A	37.5	1.38807	1.85853	1.71119e-06	1.57348e-05
RNF139	1293.7	0.44399	0.45299	1.73806e-06	1.59719e-05
ATF7	1156	-0.46023	-0.47054	1.75232e-06	1.60928e-05
KIAA1524	146	-0.94972	-1.05303	1.79323e-06	1.64582e-05
TBC1D9	1676.8	0.54172	0.55853	1.80043e-06	1.65139e-05
RP11-214O1.2	59.9	-1.30103	-1.69588	1.80177e-06	1.65158e-05
SLC38A6	444.2	0.61003	0.63477	1.80968e-06	1.6578e-05
TMEM117	526.3	-0.72362	-0.76719	1.81152e-06	1.65845e-05
HERC6	1688	1.4493	2.05978	1.81898e-06	1.66423e-05
APLP1	185.8	0.82026	0.88059	1.84508e-06	1.68706e-05
POGLUT1	874.3	0.53697	0.55328	1.86104e-06	1.7006e-05
FBXO30	1084.1	-0.523	-0.53831	1.86437e-06	1.70257e-05
NAV2	5074.2	0.61928	0.64496	1.86781e-06	1.70361e-05
NLGN4Y	529.3	0.56918	0.58876	1.86783e-06	1.70361e-05
BICD2	2191.9	0.42913	0.43729	1.86935e-06	1.70394e-05
TMED2	9258.2	0.42515	0.43308	1.87693e-06	1.70978e-05
KLF3	2186.7	0.52867	0.5443	1.91772e-06	1.74586e-05
N4BP1	2031.5	0.67819	0.7123	1.92049e-06	1.74728e-05
PRR3	380.6	-0.6644	-0.69608	1.92545e-06	1.75071e-05
PCCB	901.9	-0.50064	-0.514	1.94569e-06	1.76802e-05
CFI	225.4	-0.97549	-1.09584	1.96482e-06	1.7843e-05
SLC25A23	1647.4	0.41962	0.42724	1.97919e-06	1.79623e-05
MRPL15	1151	-0.47538	-0.48663	1.99362e-06	1.80821e-05
NDUFS2	2417.1	-0.42215	-0.42997	2.02865e-06	1.83884e-05
GPRC5B	246.4	0.95844	1.06689	2.03154e-06	1.84032e-05
ANAPC13	1898.3	0.46919	0.48005	2.05422e-06	1.85971e-05
NDST1	12625.8	0.45286	0.46255	2.0571e-06	1.86117e-05
UNKL	623.9	-0.64395	-0.67353	2.07108e-06	1.87267e-05
FAM46B	33.9	-1.52196	-2.41275	2.09942e-06	1.89712e-05
MRGPRF	1180.2	-0.5018	-0.51495	2.10185e-06	1.89814e-05
SZRD1	8812.9	0.41612	0.42363	2.1046e-06	1.89941e-05
PM20D2	75.8	-1.2533	-1.6597	2.10585e-06	1.89941e-05
ID3	6971.3	-0.46507	-0.47571	2.11689e-06	1.90819e-05
UBP1	4199.5	0.44794	0.45736	2.1385e-06	1.92649e-05
MRPL50	496.8	0.58576	0.60757	2.15233e-06	1.93659e-05
ARL6IP6	329	-0.68245	-0.71716	2.15235e-06	1.93659e-05
ZSWIM5	54.9	1.28669	1.6038	2.16143e-06	1.94356e-05
ELOA	3080.5	0.56174	0.58084	2.17891e-06	1.95807e-05
CLTB	2935.3	0.45401	0.46386	2.21749e-06	1.99152e-05
BNIP2	3082	0.43427	0.44288	2.2435e-06	2.01365e-05
ZNF267	391.9	0.94139	1.04937	2.24853e-06	2.01693e-05
INTU	299.6	-0.70446	-0.74379	2.25557e-06	2.022e-05
STX16	1649.4	-0.4403	-0.44982	2.32672e-06	2.08452e-05
EZH2	205.7	-0.82038	-0.88518	2.35589e-06	2.10936e-05
IFNAR1	3295.9	0.42929	0.43762	2.36005e-06	2.11179e-05
PTGS2	1519.9	1.48361	2.28116	2.37918e-06	2.12761e-05
RABGEF1	2191.8	0.47668	0.48821	2.38778e-06	2.134e-05
GTF2E2	1504.1	0.49274	0.50558	2.39284e-06	2.13722e-05
OXSR1	3379.9	0.4717	0.48287	2.43253e-06	2.17134e-05
SCYL2	2532.8	0.47672	0.48832	2.43598e-06	2.17309e-05
BAG2	2794	-0.48811	-0.50036	2.48928e-06	2.21929e-05
PDIA4	6803.5	-0.43074	-0.4392	2.52541e-06	2.25013e-05
MBNL2	2015	-0.52684	-0.54316	2.54055e-06	2.26217e-05
OLFML3	9474.6	-0.49611	-0.5093	2.54201e-06	2.26217e-05
ZFP36L1	10733.7	-0.5377	-0.55454	2.54659e-06	2.26487e-05
PAPOLA	4883	0.41989	0.42772	2.5576e-06	2.27328e-05
DNAJB1	2644.2	0.40678	0.41391	2.58034e-06	2.29095e-05
FRMD6-AS1	56.2	-1.31281	-1.74892	2.58061e-06	2.29095e-05
C17orf58	165.2	-0.90823	-1.00626	2.60661e-06	2.31263e-05
KIAA1549L	3752.3	0.49121	0.50391	2.61916e-06	2.32236e-05
TRAP1	1140.4	-0.4474	-0.45688	2.64262e-06	2.34174e-05
CLIP2	3788.9	0.42516	0.43335	2.68096e-06	2.37369e-05
ETV4	150.3	0.89532	0.98209	2.68191e-06	2.37369e-05
LETMD1	567.4	-0.69267	-0.73092	2.71501e-06	2.40154e-05
ANKRD9	513.3	0.59605	0.61959	2.74009e-06	2.42226e-05
MAGI2	432.9	0.63899	0.66869	2.74316e-06	2.42351e-05
SCG5	257.3	0.73603	0.7842	2.7747e-06	2.4499e-05
RDH10	1107.6	0.4874	0.49995	2.83242e-06	2.49936e-05
RALGPS2	2212.2	0.58498	0.60719	2.87368e-06	2.53424e-05
APOD	541.4	0.6474	0.67856	2.91402e-06	2.56826e-05
NBEA	886.3	0.49513	0.50842	2.93354e-06	2.58392e-05
EIF5A2	626	0.62248	0.65037	2.93888e-06	2.58706e-05
DEPDC1B	30.8	-1.44688	-2.05125	2.95305e-06	2.59797e-05
RBM24	158.3	0.84374	0.91079	2.96222e-06	2.60448e-05
ALDOC	350.8	-0.8492	-0.9232	2.97138e-06	2.61097e-05
PGK1	8715.7	-0.34798	-0.35249	2.99377e-06	2.62906e-05
CAPN1	5069.9	0.34343	0.34772	3.00794e-06	2.63992e-05
CTD-2186M15.3	49.3	-1.32566	-1.81777	3.01176e-06	2.64169e-05
RIOK2	1233.7	-0.52776	-0.54409	3.03894e-06	2.66394e-05
CRTAP	12197.3	0.34652	0.35095	3.09885e-06	2.71483e-05
NAT10	1619.6	-0.45209	-0.46213	3.12271e-06	2.7341e-05
C3orf67	234.7	0.81286	0.87813	3.15872e-06	2.76397e-05
STX3	1129.2	0.58363	0.60585	3.17109e-06	2.77314e-05
PPP2R3A	1575.5	0.61278	0.6388	3.19586e-06	2.79314e-05
E2F1	53.4	-1.27597	-1.6278	3.22089e-06	2.81333e-05
PIK3IP1	180.3	-0.95118	-1.05465	3.26602e-06	2.85105e-05
ELP6	623.9	-0.56258	-0.58226	3.2877e-06	2.86704e-05
LSS	4043.7	-0.35112	-0.35579	3.28825e-06	2.86704e-05
RFC5	126.9	-0.92724	-1.02935	3.293e-06	2.86948e-05
WIPF1	1860.2	0.49647	0.50996	3.29927e-06	2.87323e-05
STK17A	2867.6	0.44488	0.45448	3.32274e-06	2.89195e-05
ABCA9	79.1	1.16408	1.40658	3.41844e-06	2.97347e-05
SLC1A1	335.1	0.72963	0.77461	3.53335e-06	3.0716e-05
SFXN3	1325.2	0.42665	0.43506	3.54838e-06	3.08284e-05
RNASEL	743.5	-0.5434	-0.5621	3.5539e-06	3.0858e-05
STPG1	337.8	0.68793	0.72578	3.56604e-06	3.09314e-05
PARP10	816.1	0.64155	0.67239	3.56657e-06	3.09314e-05
PTGER4	47.6	1.45867	2.32178	3.63165e-06	3.14772e-05
ERCC8	373.2	-0.71081	-0.75559	3.64779e-06	3.15983e-05
IL33	304.1	1.00709	1.14832	3.65581e-06	3.16492e-05
SDCBP	5728	0.39517	0.40191	3.66566e-06	3.17136e-05
PPIP5K2	1725.5	-0.46417	-0.47515	3.66759e-06	3.17136e-05
MEGF9	1158.5	0.81216	0.87866	3.67653e-06	3.17721e-05
LANCL2	727.9	-0.49972	-0.51363	3.72054e-06	3.21335e-05
NRSN2	2405.2	-0.40106	-0.40817	3.80965e-06	3.28837e-05
RMND1	628.7	-0.56709	-0.58845	3.8251e-06	3.29977e-05
LMO4	2865.7	-0.4411	-0.45058	3.88195e-06	3.34641e-05
VPS45	1010.6	-0.46632	-0.47755	3.88374e-06	3.34641e-05
RFNG	1360.9	0.48051	0.49285	3.89777e-06	3.35653e-05
C3	479.5	-0.72511	-0.78085	3.90508e-06	3.36084e-05
XPC	3517.8	0.4471	0.45699	3.90912e-06	3.36099e-05
LRRC17	253.5	0.72637	0.77337	3.91153e-06	3.36099e-05
SENP6	3595.8	0.41852	0.42661	3.91213e-06	3.36099e-05
GTF3C6	1118.4	-0.4942	-0.50762	3.91706e-06	3.36325e-05
PPP2R5E	1586.1	0.43624	0.44546	3.99753e-06	3.43034e-05
LYPLA1	431.2	-0.59438	-0.61941	4.01557e-06	3.44204e-05
PLEKHO2	2085	-0.37562	-0.38155	4.01587e-06	3.44204e-05
CRELD2	1312.4	-0.49442	-0.50781	4.03276e-06	3.4532e-05
ARHGAP35	4615.2	0.39458	0.40134	4.03391e-06	3.4532e-05
CLNS1A	2027	-0.38617	-0.39264	4.03597e-06	3.4532e-05
BCL7A	409.4	0.8318	0.90358	4.09699e-06	3.50337e-05
SLC16A5	300	-0.75865	-0.81036	4.11119e-06	3.51346e-05
LRRC38	66.6	1.23642	1.54949	4.17438e-06	3.56538e-05
ANXA4	3281.6	0.41076	0.41842	4.18027e-06	3.56833e-05
C14orf132	1983.3	-0.4639	-0.47494	4.19302e-06	3.57713e-05
TTC39C	943.3	0.50497	0.51948	4.20604e-06	3.58615e-05
PTGS1	4617.1	0.47851	0.49075	4.25187e-06	3.62311e-05
KCNQ5	874.4	0.61532	0.64244	4.25738e-06	3.6257e-05
SATB2	235.6	0.79957	0.86516	4.27696e-06	3.64026e-05
ANKRD13A	4155	0.39713	0.40405	4.28097e-06	3.64156e-05
FNBP1	1113.9	-0.49089	-0.50429	4.28884e-06	3.64614e-05
QSOX1	32794.9	0.32001	0.3236	4.30177e-06	3.655e-05
NCEH1	1671.1	0.58172	0.6045	4.31771e-06	3.66643e-05
SLC25A46	1564	0.46575	0.47708	4.32538e-06	3.67063e-05
RHOA	16659.5	0.36727	0.37273	4.32768e-06	3.67063e-05
CLK1	828.8	0.5759	0.59786	4.35052e-06	3.68787e-05
CDC25C	17.6	-1.51666	-2.77971	4.39102e-06	3.72005e-05
SLC39A7	9109.2	0.35633	0.36131	4.39498e-06	3.72125e-05
ZNF426	654.7	-0.61894	-0.64747	4.43689e-06	3.75457e-05
NTNG2	193.1	0.77242	0.82587	4.45946e-06	3.77149e-05
PLCB4	1010.2	0.80017	0.86453	4.46744e-06	3.77605e-05
LRRFIP1	5329.7	0.55941	0.57954	4.4822e-06	3.7846e-05
GALC	1077.1	0.48724	0.50029	4.48272e-06	3.7846e-05
CHPT1	1078	0.48226	0.49496	4.49936e-06	3.79647e-05
ZNF880	490.1	0.58156	0.60468	4.60646e-06	3.88459e-05
TAP1	4605.2	1.02585	1.18077	4.61699e-06	3.89123e-05
ANGPTL2	8072.5	0.96662	1.09371	4.63068e-06	3.90053e-05
TP53INP2	1601.9	0.47107	0.48281	4.66264e-06	3.92519e-05
MYOZ1	45.2	-1.37557	-1.94751	4.74709e-06	3.99399e-05
ING1	446.6	0.78647	0.84757	4.76698e-06	4.00842e-05
SRSF2	4223.2	-0.43125	-0.44027	4.80335e-06	4.03669e-05
CNEP1R1	718.1	0.59283	0.61722	4.82852e-06	4.05551e-05
RNF11	3495.9	-0.4097	-0.41765	4.8374e-06	4.06064e-05
UBAC2	2173.7	0.37868	0.38473	4.85086e-06	4.06961e-05
TESK1	2178.5	0.53446	0.55211	4.85364e-06	4.06961e-05
PARP9	2390.7	0.72344	0.76996	4.89951e-06	4.10572e-05
EVI5	941.9	0.49988	0.51406	4.93872e-06	4.13621e-05
VPS37B	1325.8	0.48744	0.50066	4.9538e-06	4.14647e-05
TRIM2	1431.2	0.59943	0.625	4.96778e-06	4.1558e-05
JMJD8	2254.9	0.39255	0.39932	5.01521e-06	4.19308e-05
ANP32B	3176	-0.35625	-0.36141	5.05203e-06	4.22146e-05
KIAA1324	76.2	1.1131	1.33406	5.06636e-06	4.23101e-05
ISG15	4451.6	1.42184	2.13422	5.08092e-06	4.24076e-05
HIP1R	1041.2	1.21015	1.51869	5.09479e-06	4.24991e-05
ETS2	895	0.59532	0.62049	5.10089e-06	4.25258e-05
ATP6AP1	4616.4	0.38039	0.38657	5.11946e-06	4.26563e-05
ECHDC3	57.2	-1.22259	-1.51501	5.13744e-06	4.27818e-05
RAB22A	2392.8	0.42859	0.43752	5.16577e-06	4.29933e-05
SBF2-AS1	225.3	-0.80981	-0.87784	5.18163e-06	4.31008e-05
SGK3	165.5	0.85814	0.94458	5.20276e-06	4.3252e-05
SPIDR	1304.7	-0.49498	-0.50889	5.22878e-06	4.34437e-05
CHD1	1277.4	0.51068	0.52623	5.33879e-06	4.43325e-05
SLC25A30	365.6	-0.80664	-0.88068	5.35142e-06	4.44122e-05
MR1	1538	0.42231	0.43087	5.39688e-06	4.47641e-05
NMT2	717.9	0.54968	0.56903	5.40587e-06	4.48133e-05
MED13L	5711.9	0.60695	0.63372	5.42787e-06	4.49703e-05
TRAPPC8	2003.4	0.3806	0.38683	5.44731e-06	4.51058e-05
PRRC2C	8166.2	-0.49124	-0.50503	5.46184e-06	4.52006e-05
ARHGAP1	5888.4	0.35956	0.36478	5.4994e-06	4.54858e-05
PDE4C	23.5	1.49291	2.50662	5.51083e-06	4.55545e-05
WBP2	2249.7	0.40809	0.41582	5.5448e-06	4.58095e-05
TSKU	1710.1	1.04178	1.20882	5.55162e-06	4.584e-05
PIP5K1A	2571.9	-0.39506	-0.4021	5.71437e-06	4.71573e-05
PINK1-AS	645.4	0.50336	0.51817	5.7428e-06	4.73652e-05
ZNF451	1248.9	0.43245	0.44176	5.82397e-06	4.80076e-05
TMEM60	482.9	0.69034	0.73133	5.84976e-06	4.81931e-05
SMAGP	476.8	-0.56929	-0.59186	5.8655e-06	4.82955e-05
MRPS18B	959.6	-0.5484	-0.5678	5.9279e-06	4.8782e-05
NSD1	5029	-0.44153	-0.45147	5.94718e-06	4.89131e-05
ELMOD1	27.4	1.41069	2.11775	5.9739e-06	4.91053e-05
RPL12	6945.8	-0.39215	-0.39904	5.98616e-06	4.91785e-05
REEP3	2306	0.51292	0.52841	6.04535e-06	4.96369e-05
PIAS2	744.9	0.51172	0.52763	6.0514e-06	4.96588e-05
ITPKB	328.3	0.70816	0.75239	6.11576e-06	5.01588e-05
MRPL3	2415.3	-0.39501	-0.40219	6.12643e-06	5.02182e-05
ZNF660	52.7	-1.23866	-1.61048	6.13193e-06	5.02352e-05
KHNYN	3285.4	-0.35767	-0.36287	6.17074e-06	5.05249e-05
XIAP	1563.5	0.59739	0.62328	6.18179e-06	5.05871e-05
LASP1	14822.6	-0.3602	-0.36551	6.18668e-06	5.05988e-05
ARHGEF40	6110	0.36082	0.36616	6.22556e-06	5.08884e-05
MAP3K3	1799.1	0.50485	0.5199	6.23844e-06	5.09653e-05
EMG1	1051.1	-0.45623	-0.46738	6.25893e-06	5.11042e-05
JRK	683.3	-0.66257	-0.69859	6.3786e-06	5.20522e-05
IVNS1ABP	2662.9	-0.46373	-0.47511	6.42469e-06	5.23991e-05
CCHCR1	241.6	-0.94598	-1.06145	6.43998e-06	5.24946e-05
PLOD1	16478.5	0.31745	0.32108	6.4971e-06	5.29307e-05
BNC1	322.4	0.64451	0.67685	6.50974e-06	5.30043e-05
EMILIN1	9640.8	-0.37234	-0.37823	6.54242e-06	5.32407e-05
E2F3	1095.9	0.48129	0.4945	6.70492e-06	5.45329e-05
HES4	164.8	0.85671	0.94116	6.76933e-06	5.50262e-05
TDG	640.1	-0.57189	-0.5948	6.85914e-06	5.57096e-05
PACRGL	341.5	0.6239	0.65329	6.86101e-06	5.57096e-05
CYB5R4	700.2	-0.52823	-0.54678	6.9381e-06	5.63043e-05
CCDC85C	180.4	-0.84059	-0.91698	6.99284e-06	5.67171e-05
DOCK5	2040.1	0.55575	0.57631	7.05641e-06	5.7201e-05
USP42	668.9	0.69539	0.7375	7.06577e-06	5.72452e-05
CDC23	1336.3	-0.44671	-0.45719	7.10763e-06	5.75525e-05
PPARG	334.5	0.65505	0.68985	7.11463e-06	5.75774e-05
ULBP1	362.2	0.69882	0.74193	7.28835e-06	5.89251e-05
TXNRD1	15375.1	0.58745	0.61224	7.28921e-06	5.89251e-05
ARL5A	310.7	0.64646	0.67932	7.30342e-06	5.90075e-05
SLC9A7	1357.4	0.64893	0.68302	7.31126e-06	5.90383e-05
VIPAS39	1000.9	-0.46782	-0.47973	7.32601e-06	5.91247e-05
PHLDB3	337.7	0.72473	0.77423	7.39045e-06	5.96119e-05
TSPY26P	205.9	-0.82163	-0.89148	7.48588e-06	6.03484e-05
SYBU	380.4	-0.84326	-0.9298	7.51958e-06	6.05868e-05
CELSR2	106.4	0.97699	1.10187	7.54666e-06	6.07715e-05
GFPT2	1326	0.47617	0.48886	7.58735e-06	6.10656e-05
ALYREF	1110.5	-0.45572	-0.46701	7.6363e-06	6.14259e-05
CFDP1	1043.1	0.47643	0.48939	7.65083e-06	6.15089e-05
TMEM184B	3610.8	0.37822	0.38453	7.67256e-06	6.16499e-05
ATG14	886.7	0.52832	0.5462	7.6776e-06	6.16565e-05
PBXIP1	5388.9	0.31374	0.31731	7.7346e-06	6.20802e-05
CHAF1A	200.7	-0.77989	-0.84182	7.74903e-06	6.2162e-05
KLF4	4364.4	0.97352	1.11018	7.75853e-06	6.22041e-05
ESCO2	25.8	-1.42329	-2.20002	7.76445e-06	6.22176e-05
GOLGA4	6667.2	0.55003	0.57026	7.79841e-06	6.24555e-05
IFNGR2	2450.5	0.36768	0.37348	7.84638e-06	6.28053e-05
FKBP5	389	-0.70016	-0.74311	7.90226e-06	6.32181e-05
ACAP3	1563.8	0.52449	0.54189	8.0075e-06	6.40251e-05
CORO1C	12855.7	0.4659	0.47799	8.05992e-06	6.4409e-05
SNX3	4678.5	0.38092	0.3874	8.06699e-06	6.44304e-05
SAMD8	1504.3	-0.4942	-0.50886	8.0923e-06	6.45973e-05
SPIRE1	3085.9	0.56145	0.58314	8.14613e-06	6.49843e-05
ANTXR1	19582.3	0.41782	0.42644	8.14966e-06	6.49843e-05
PLK3	1132.4	0.62322	0.65333	8.16539e-06	6.50743e-05
FBXO9	1479.1	0.39884	0.40629	8.19762e-06	6.52957e-05
EXOSC9	719.7	-0.60433	-0.63135	8.35153e-06	6.64825e-05
WNT5B	5501.2	0.41221	0.4205	8.3557e-06	6.64825e-05
SDE2	682.8	-0.55349	-0.575	8.39773e-06	6.67269e-05
FMNL1	242.6	-0.77256	-0.83741	8.39869e-06	6.67269e-05
ZMYND11	3682.3	0.36447	0.37016	8.40008e-06	6.67269e-05
MAF1	3428.9	0.37426	0.38042	8.42272e-06	6.68704e-05
IDH2	1792	-0.45564	-0.46683	8.44744e-06	6.70304e-05
RPS9	9570.8	-0.31824	-0.32201	8.50182e-06	6.74253e-05
ARHGAP27	150.6	1.1166	1.37242	8.58697e-06	6.80638e-05
CCNDBP1	1454.5	0.41563	0.42413	8.61029e-06	6.82117e-05
MTMR2	2824.5	-0.43393	-0.44381	8.65821e-06	6.85543e-05
NOP58	1435.8	-0.46906	-0.48173	8.88071e-06	7.0278e-05
IQCJ-SCHIP1	231.3	0.74118	0.79477	8.93369e-06	7.06591e-05
HERC4	3461.1	0.41365	0.4221	9.00011e-06	7.1146e-05
SGIP1	471.9	0.53742	0.55632	9.08962e-06	7.1812e-05
GPR68	456.7	1.193	1.48364	9.09416e-06	7.1812e-05
PARP12	844.5	0.75221	0.80831	9.14105e-06	7.21434e-05
LDLR	6022.7	0.50602	0.52189	9.18145e-06	7.24002e-05
PABPC4L	150.5	-0.88898	-0.98843	9.1854e-06	7.24002e-05
OSBPL5	1466.5	-0.44887	-0.45979	9.19301e-06	7.24002e-05
EFR3A	6023.5	0.51601	0.53283	9.19336e-06	7.24002e-05
BIVM	538.6	0.57604	0.59983	9.32539e-06	7.34005e-05
HMGN2	591.3	-0.53141	-0.5491	9.54852e-06	7.51164e-05
C10orf10	26.8	-1.45193	-3.26333	9.60726e-06	7.55379e-05
SPATS2L	6497.8	0.521	0.53843	9.68873e-06	7.61376e-05
GNA11	3830.8	0.35978	0.36532	9.70775e-06	7.62462e-05
EML1	2034.3	0.4002	0.4079	9.85274e-06	7.73435e-05
CAMKK1	326.8	-0.6897	-0.73441	9.89143e-06	7.76056e-05
GTDC1	572.1	-0.55831	-0.58114	9.915e-06	7.77489e-05
NCR3LG1	871.9	0.70324	0.74905	9.95343e-06	7.80084e-05
CARD9	165.2	-1.06235	-1.25813	9.97072e-06	7.81022e-05
ZBTB43	630.5	0.67284	0.71355	1.0001e-05	7.82977e-05
AIFM1	881.8	-0.4578	-0.46957	1.01027e-05	7.90512e-05
PANK2	1514.1	0.51105	0.52754	1.01448e-05	7.93385e-05
MKNK2	3792.3	-0.65621	-0.69297	1.01699e-05	7.9492e-05
PSMD7	3121.3	0.4033	0.41122	1.01876e-05	7.95882e-05
TMEM106B	1164	0.53348	0.55256	1.02035e-05	7.96361e-05
GALNT18	185.2	0.8977	0.99862	1.02046e-05	7.96361e-05
RP11-540A21.2	52.7	-1.39824	-2.24666	1.02492e-05	7.99413e-05
PLCD3	2851.8	0.40705	0.41522	1.02721e-05	8.00779e-05
RP5-1039K5.19	110.7	0.94962	1.08203	1.0612e-05	8.26836e-05
MYD88	3180.7	0.58316	0.60853	1.07107e-05	8.34081e-05
ARPC5	6186.9	0.43735	0.44757	1.08007e-05	8.40643e-05
INPP5F	1123.3	0.45558	0.46706	1.08471e-05	8.43807e-05
ELP5	747.6	-0.47282	-0.48529	1.08608e-05	8.44304e-05
ABHD14B	1036.8	-0.45366	-0.46447	1.08651e-05	8.44304e-05
ALG9	374.5	-0.60069	-0.63022	1.09044e-05	8.46916e-05
SLC4A11	146.6	0.99206	1.14091	1.09182e-05	8.47536e-05
LINC01021	19.2	1.44596	2.60784	1.09433e-05	8.49034e-05
SLC1A3	73.1	1.30556	1.87209	1.10318e-05	8.55446e-05
TUSC3	3000.4	0.33793	0.34257	1.11699e-05	8.65699e-05
PTMS	6392.8	-0.35459	-0.35992	1.11861e-05	8.66494e-05
SLC24A1	417	-0.66667	-0.70491	1.12142e-05	8.68214e-05
ELANE	29.7	-1.39752	-2.33989	1.12647e-05	8.71601e-05
AUNIP	18.6	-1.44698	-2.89172	1.12699e-05	8.71601e-05
TAOK3	1576.2	0.41679	0.42564	1.12944e-05	8.7304e-05
PREX1	191	-0.78066	-0.84635	1.1366e-05	8.78107e-05
NECTIN1	690.2	0.4798	0.49339	1.15716e-05	8.9352e-05
LURAP1L	1024.7	0.48455	0.49895	1.16324e-05	8.97739e-05
PSAP	77436.8	0.3473	0.35237	1.17068e-05	9.03007e-05
FEM1B	2523.5	-0.48322	-0.49734	1.18856e-05	9.16316e-05
LEF1	78.1	-1.12559	-1.40031	1.20187e-05	9.26088e-05
KCNC4	427	0.53115	0.54943	1.20544e-05	9.28352e-05
UNC50	1042.6	0.42996	0.43976	1.22318e-05	9.41521e-05
INPP4B	1059.3	0.70272	0.74937	1.22501e-05	9.42432e-05
ARHGAP12	1623.6	0.40886	0.41731	1.24238e-05	9.55296e-05
FDX1	421.3	0.60574	0.63525	1.24612e-05	9.57666e-05
TRIM23	583.8	-0.56933	-0.59352	1.25064e-05	9.60638e-05
RP11-708J19.1	29.4	-1.36779	-2.07641	1.26342e-05	9.69947e-05
BEST1	384.5	-0.70282	-0.75234	1.28722e-05	9.87703e-05
EPB41L4A-AS1	858.1	-0.47921	-0.49345	1.2884e-05	9.88084e-05
PXDC1	3203.5	0.33254	0.33702	1.28958e-05	9.88477e-05
FAM13A	723.6	-0.54742	-0.56915	1.30152e-05	9.97108e-05
CLPX	1166.7	-0.41927	-0.42856	1.30498e-05	9.99232e-05
NBPF1	1110.8	-0.53741	-0.55724	1.31686e-05	0.00010078
PLPP4	575.7	0.51667	0.53417	1.32214e-05	0.000101132
CCDC97	976.8	-0.48422	-0.49881	1.34756e-05	0.000103022
IGFBP4	31337.6	0.2959	0.29905	1.35316e-05	0.000103397
ROBO1	3352.3	0.41199	0.4207	1.35986e-05	0.000103854
NCBP2-AS2	259	-0.73453	-0.78981	1.36154e-05	0.000103928
ALAS1	1354.5	-0.38855	-0.3958	1.36328e-05	0.000104007
FAM83H	473.8	0.54077	0.56109	1.36777e-05	0.000104295
CYBRD1	24030.4	0.38407	0.3911	1.37278e-05	0.000104623
CSNK1G2	2744.4	0.3794	0.38616	1.37391e-05	0.000104654
HSP90B1	34521.4	-0.46218	-0.47464	1.38104e-05	0.000105133
SELPLG	236.8	0.76202	0.82529	1.38163e-05	0.000105133
ADRB2	25.2	1.43257	2.66855	1.39361e-05	0.00010599
SLC9A7P1	33.6	-1.31421	-1.84186	1.39626e-05	0.000106136
SCD5	694.9	0.48134	0.49561	1.41202e-05	0.000107278
HTR2B	133.8	-1.0251	-1.23795	1.41366e-05	0.000107348
OSR2	2567.6	-0.38987	-0.39713	1.42237e-05	0.000107953
ALDH3B1	1429	-0.49385	-0.50922	1.4293e-05	0.000108423
ELOVL2	142.5	0.9804	1.12293	1.43489e-05	0.00010879
NUDT18	414.9	-0.70614	-0.75329	1.44551e-05	0.000109538
BCAT2	586	-0.52987	-0.54896	1.44882e-05	0.000109732
SGO1	15	-1.43707	-3.09627	1.45008e-05	0.000109772
ADAMTSL1	2926	0.42758	0.43738	1.47129e-05	0.00011132
RAVER2	200.9	-0.79798	-0.87905	1.47984e-05	0.000111909
UBLCP1	1551.8	0.42569	0.43541	1.48073e-05	0.000111918
NPTX1	257.7	0.76697	0.82494	1.48326e-05	0.000112014
EPDR1	984.2	0.47867	0.49264	1.48353e-05	0.000112014
WDR76	75.3	-1.15353	-1.42348	1.50454e-05	0.000113542
CENPBD1P1	1448	0.41324	0.42215	1.50595e-05	0.00011359
ATP1B3	3829.5	0.35611	0.36173	1.51095e-05	0.000113909
TFAP2A	764.7	0.52239	0.54098	1.513e-05	0.000114004
MFAP4	23144.8	-0.49811	-0.51421	1.51616e-05	0.000114184
RFWD2	1786.9	0.41574	0.42482	1.52196e-05	0.000114562
RP11-363E7.4	44.8	1.26587	1.7793	1.54907e-05	0.000116542
CAMKK2	2504.4	0.45193	0.46371	1.55092e-05	0.000116622
KRT18	203	-0.76804	-0.83123	1.55563e-05	0.000116915
NTRK3	56.8	1.21781	1.56134	1.55976e-05	0.000117166
CDC42SE2	490.9	0.56408	0.5875	1.56305e-05	0.000117353
CYTH2	1265.4	0.42458	0.43427	1.56443e-05	0.000117396
VLDLR-AS1	108.4	-0.95498	-1.11123	1.56743e-05	0.000117562
GLCE	909.3	0.47716	0.49122	1.58066e-05	0.000118493
LPCAT2	782.9	0.49031	0.50555	1.5928e-05	0.000119342
FASTKD2	993.3	-0.45032	-0.46258	1.5947e-05	0.000119423
DYNLT3	903.7	0.4965	0.51219	1.59656e-05	0.000119496
MGARP	204	0.73693	0.7937	1.5973e-05	0.000119496
RAD54L	23.5	-1.39242	-2.31727	1.60517e-05	0.000120023
POC1A	125.8	-0.89578	-1.00042	1.61754e-05	0.000120886
CROT	726.2	0.55378	0.57624	1.62076e-05	0.000121065
STARD3NL	1419.4	-0.46335	-0.47642	1.62255e-05	0.000121137
BCAR3	1558.9	0.38948	0.39694	1.63077e-05	0.000121689
NDUFAF8	766.2	0.50161	0.518	1.64304e-05	0.000122542
CAV2	3007.5	0.35015	0.35553	1.64707e-05	0.00012278
DCLRE1B	163	-0.76385	-0.82236	1.65256e-05	0.000123127
FAM46A	5536.6	1.04626	1.2457	1.66506e-05	0.000123995
TOMM34	1757.6	0.37079	0.37722	1.67367e-05	0.000124573
DNM1	1269.1	0.46806	0.48136	1.67784e-05	0.00012482
GPX3	94.9	1.01516	1.19893	1.68035e-05	0.000124943
EXOC5	2433.8	0.42574	0.43561	1.68365e-05	0.000125125
RFXANK	818.7	-0.48931	-0.50442	1.68755e-05	0.000125351
POLR2G	1297	-0.39166	-0.39913	1.69787e-05	0.000126054
PIK3AP1	26.6	1.42595	3.53138	1.71408e-05	0.000127193
GGPS1	1229.1	0.45031	0.46212	1.72867e-05	0.00012821
PTHLH	165.3	0.92536	1.0411	1.75515e-05	0.000130048
YARS	7739.5	-0.3477	-0.35304	1.75523e-05	0.000130048
EMSY	778.3	0.50036	0.51665	1.76621e-05	0.000130796
KLHL9	1852.1	-0.41785	-0.42735	1.80215e-05	0.00013339
PRPF4B	2325.5	0.50669	0.52385	1.8141e-05	0.000134207
LPGAT1	3139.8	0.43395	0.44448	1.8158e-05	0.000134264
MANSC1	310.3	0.61352	0.64502	1.8256e-05	0.000134921
STC2	18940	0.38605	0.39342	1.83687e-05	0.000135685
TIMM13	1222.6	-0.41207	-0.42112	1.84479e-05	0.000136202
PCDH1	166.2	0.96998	1.11876	1.84612e-05	0.000136232
TEF	252.1	-0.71729	-0.76736	1.85519e-05	0.000136832
CYP24A1	38.1	-1.34087	-2.33237	1.89143e-05	0.000139435
ATXN7L3B	3301.4	-0.36263	-0.36866	1.89597e-05	0.000139699
ZBTB24	320.8	-0.60482	-0.63514	1.90612e-05	0.000140376
STAG1	2879.7	0.39154	0.39925	1.91887e-05	0.000141244
SAV1	1074.5	0.52339	0.54261	1.92548e-05	0.000141659
KCNA3	20.9	1.39772	2.70147	1.93045e-05	0.000141954
UCP2	40	-1.25217	-1.6235	1.93723e-05	0.000142381
PHF19	777.2	-0.44782	-0.45883	1.95457e-05	0.000143583
ELK1	2180	0.51069	0.52838	1.97151e-05	0.000144755
AK9	89.5	0.9908	1.16472	1.97333e-05	0.000144817
HDAC9	262.3	0.69147	0.7381	1.97599e-05	0.000144939
AC093627.10	61.9	-1.14226	-1.4166	1.98475e-05	0.000145509
COPS4	1692	-0.41904	-0.42873	2.01146e-05	0.000147393
[truncated: 2,805 more rows]

## Sheet: UBF siRNA
gene	baseMean	log2FC	log2FCunshrunk	pvalue	padj
UBTF	3388.6	-2.52924	-2.57654	0	0
ALDH9A1	2189.9	-2.18242	-2.22412	0	0
CPA4	1713.4	2.24769	2.29073	0	0
DRAM1	9947.9	1.92656	1.95786	0	0
INHBB	844.3	-2.7048	-2.82056	0	0
ELOVL5	3804.5	-2.09017	-2.13514	0	0
CDKN1A	53346.9	1.86661	1.90291	0	0
TNFRSF10B	9771.9	1.6484	1.67506	0	0
PLBD2	7722.7	-1.40729	-1.42674	0	0
MAT2B	1647.4	-2.15065	-2.22569	0	0
TNFRSF10D	2530.8	1.95138	2.00415	0	0
GDF15	3323	2.61552	2.74846	0	0
MFAP5	996.9	-2.40777	-2.51807	0	0
CHN1	3514.8	-1.58605	-1.61558	0	0
FBXO28	923	-2.10643	-2.18247	0	0
GNPTAB	3470	-1.7866	-1.83175	0	0
ST13	1618.2	1.66345	1.69923	0	0
SLC7A1	5650.5	-1.54265	-1.57127	0	0
HDAC3	1112.4	-1.83892	-1.89073	0	0
PAPPA	8511	1.67131	1.71007	0	0
WDFY1	3045.4	-1.629	-1.6664	0	0
NT5E	12907	1.44523	1.47122	0	0
PRMT6	636.2	-2.27103	-2.38799	0	0
PSG5	7153.1	1.49446	1.52475	0	0
IFT46	627.9	-2.11275	-2.20826	0	0
ARL2BP	1955.7	-1.51611	-1.54739	0	0
TECPR2	1999.4	1.51029	1.54348	0	0
PPP2R1B	1144.4	-1.60621	-1.64798	0	0
RP11-382A20.3	938.6	-1.98263	-2.06881	0	0
CTD-2033D15.2	459	-2.70241	-2.92849	0	0
REEP3	2306	-1.77935	-1.84075	0	0
MOSPD1	1235.4	1.44407	1.47483	0	0
RCAN2	1539.6	1.54735	1.58657	0	0
TNFRSF10C	490.9	2.20454	2.33982	0	0
SDC1	1307.5	-1.83767	-1.90995	0	0
ODC1	3530	-1.24351	-1.26384	0	0
CTGF	23564.1	-1.52698	-1.56613	0	0
ACAN	5315.5	-1.55182	-1.59385	0	0
MXRA5	12156.8	-1.52617	-1.5666	0	0
FAM168A	2027.2	-1.24219	-1.26415	0	0
PRC1	381.2	-2.11511	-2.22394	0	0
DESI2	2438.4	1.33344	1.36133	0	0
SUSD1	791.5	-1.7642	-1.82921	0	0
TSPAN17	1630	-1.23744	-1.26091	0	0
RACGAP1	362.5	-1.97768	-2.0777	0	0
OXTR	4319.9	-1.088	-1.1035	0	0
KIF20A	149	-2.95145	-3.29561	0	0
PON2	2211.4	-1.31208	-1.3407	0	0
TOP2A	470.9	-2.10591	-2.22258	0	0
IL7R	2750.4	1.40678	1.44147	0	0
NES	1824.1	-1.51436	-1.55915	0	0
TCTA	895.7	-1.48267	-1.52482	0	0
POU2F2	1499.4	1.6636	1.7298	0	0
IGSF10	420.1	2.0479	2.1632	0	0
PLIN2	4697.6	1.26835	1.2943	0	0
TNPO1	8255.1	1.29764	1.32576	0	0
ECE1	14258	1.00176	1.01487	0	0
STMN1	1100.8	-1.46141	-1.50242	0	0
GPX1	3875.1	-1.24638	-1.27267	0	0
DAAM2	1745.9	-1.35393	-1.38787	0	0
NEDD4	1760.2	1.55661	1.60923	0	0
CTNND1	8053.5	-1.00708	-1.02064	0	0
RND3	17393.5	1.62469	1.68432	0	0
PTPRF	2526.6	-1.25577	-1.28374	0	0
MEIS2	2043.1	-1.32289	-1.35553	0	0
PLXNB2	23381.2	0.94303	0.95436	0	0
C9orf64	471.9	-1.73475	-1.81459	0	0
MT1E	1241.7	-1.60302	-1.66243	0	0
FTL	118707	1.0176	1.03202	0	0
GADD45B	1617.5	-1.83357	-1.92498	0	0
MMP14	58948.2	1.15465	1.17619	0	0
MGAT4B	8471.7	0.97601	0.98888	0	0
M6PR	3253.5	1.10057	1.11932	0	0
TAGLN2	7051.2	-1.00985	-1.0244	0	0
MIR503HG	675.1	-1.80404	-1.88936	0	0
STAM	1721	1.1916	1.21598	0	0
AMMECR1	1041.1	1.4619	1.5086	0	0
NOV	1023.9	1.94705	2.06832	0	0
CLDND1	926.5	-1.42208	-1.46753	0	0
ACTC1	3873.9	-1.92391	-2.03615	0	0
DPP4	11276.1	1.09247	1.11198	0	0
ING4	536.6	-1.59693	-1.66457	0	0
RASSF2	1371.6	-1.41584	-1.46835	0	0
PLXNC1	2050.2	1.23071	1.26	0	0
VPS4B	1478.9	1.21793	1.24739	0	0
MYL6	24698.7	-0.96075	-0.9746	0	0
SAT1	1708.2	1.39541	1.43987	0	0
STOM	8166.5	1.07243	1.09198	0	0
RRM2	237.9	-2.11491	-2.26561	0	0
MAGEH1	583.4	-1.5706	-1.64021	0	0
SESN1	1355.4	1.26464	1.29833	0	0
SLC30A6	1173.9	-1.24222	-1.27468	0	0
LMOD1	1505.3	-1.25187	-1.28335	0	0
UBA52	10282.3	-0.93202	-0.94499	0	0
AKIRIN1	2254.1	1.08672	1.10718	0	0
MTA2	3127.9	-1.03652	-1.05475	0	0
LMNB1	152.7	-2.61138	-2.95077	0	0
ANLN	410.1	-2.20243	-2.39025	0	0
SLC4A7	3206.5	1.21886	1.24899	0	0
ERN1	1421.1	1.1726	1.19892	0	0
LAMP1	20496.9	0.77845	0.78613	0	0
TK1	236	-2.31529	-2.54051	0	0
ACTB	98717.1	-0.88613	-0.89759	0	0
GPNMB	34853.8	0.9083	0.92067	0	0
PDCD6	1945.1	-0.99643	-1.0133	0	0
NAA50	4303.7	1.14416	1.16974	0	0
RNF2	479.5	-1.60275	-1.67964	0	0
IFIT2	66047.5	3.82106	7.72914	0	0
OGFRL1	1598.3	1.35074	1.3933	0	0
MOSPD3	257.6	-2.10387	-2.30226	0	0
MAMDC2	1324.6	1.53282	1.60206	0	0
ATP6V1C1	2620.3	1.30127	1.33964	0	0
TUB	808.9	-1.38995	-1.43937	0	0
SRBD1	505.3	-1.53029	-1.59836	0	0
IFIT3	36001.9	3.70149	6.2091	0	0
ATP2A2	15670.4	-1.30875	-1.34907	0	0
KLHL12	1202.8	-1.25078	-1.28651	0	0
CD9	790	-1.62066	-1.70466	0	0
EPHB2	1297.2	-1.06666	-1.08852	0	0
CAPNS1	10312.7	-0.81619	-0.82576	0	0
SSBP3	908.7	-1.17753	-1.20805	0	0
CYB561A3	1249	-1.05522	-1.07678	0	0
SGMS2	1103.1	1.3008	1.34157	0	0
STK38L	982.5	-1.51445	-1.58007	0	0
SH2D5	388.9	1.61223	1.69663	0	0
PARN	935.5	-1.27552	-1.31501	0	0
BBC3	1197	1.2375	1.27413	0	0
ZMAT3	5490.5	1.15391	1.1824	0	0
IGF2R	18797.9	1.04653	1.06756	0	0
MCM4	552	-1.3435	-1.38891	0	0
CDC20	135.1	-2.53039	-2.86635	0	0
COL8A2	969.1	-1.38792	-1.44242	0	0
TIMP3	62531.2	-1.2679	-1.30664	0	0
COX5A	1337.4	-1.02389	-1.04429	0	0
CERK	3129.9	0.9002	0.91365	0	0
MN1	1708.2	-1.26818	-1.30788	0	0
SOD2	11181.2	1.35127	1.39907	0	0
BTG2	1221	1.43324	1.49309	0	0
CENPF	230.5	-2.10697	-2.29096	0	0
DLGAP5	84.8	-2.69561	-3.15381	0	0
ZCCHC14	1731.8	1.50088	1.56892	0	0
MCM5	286.7	-2.00063	-2.17847	0	0
ABHD12	1940.4	1.03499	1.0566	0	0
DDHD2	992.6	-1.33804	-1.38649	0	0
CAMSAP2	3465.1	1.00673	1.02666	0	0
MAP2K4	1511.6	1.08586	1.11101	0	0
INHBA	3855.8	-1.11906	-1.1469	0	0
PDGFRB	36400.7	0.95261	0.96939	0	0
SMIM15	1134.3	1.12467	1.15483	0	0
DTNA	362.3	2.01645	2.19986	0	0
CYTH3	1955.2	-0.91368	-0.9289	0	0
CYLD	2677.7	1.21793	1.25442	0	0
SQSTM1	23379.2	0.78669	0.79612	0	0
NFYA	984	-1.18828	-1.22323	0	0
CNN2	11105.1	-0.78551	-0.7949	0	0
OIP5-AS1	1852.2	1.10872	1.13539	0	0
ARIH1	3048.6	0.8618	0.87433	0	0
PABPC4	4934.5	0.83102	0.84224	0	0
ATP8B1	3923.1	0.97945	0.99863	0	0
SC5D	1259.6	1.21005	1.24652	0	0
CEP55	136.7	-2.4368	-2.7865	0	0
MKI67	282.8	-2.33301	-2.62769	0	0
SPRED1	1555.9	1.05272	1.07653	0	0
ITGA2	7483	1.45861	1.52622	0	0
NPTX1	257.7	-2.13693	-2.43082	0	0
CHCHD3	1104.4	1.04522	1.06814	0	0
ILK	8360.4	-0.80736	-0.81814	0	0
ANGPTL4	551.2	1.79515	1.93609	0	0
ATP6V0E2	248.5	-2.31611	-2.67863	0	0
LURAP1L	1024.7	1.14715	1.17913	0	0
DPYSL4	998.4	1.18024	1.21607	0	0
MEX3C	2572.6	0.92083	0.93719	0	0
SULF1	39891.5	-1.08677	-1.11408	0	0
ARHGEF9	539.7	-1.31552	-1.36762	0	0
PPP1R15A	6161.3	1.06637	1.09232	0	0
CDH4	143.8	-2.39983	-2.85779	0	0
NETO2	156.1	-2.19575	-2.5064	0	0
CAMK2D	3285.9	0.93896	0.95653	0	0
FAM160B1	1851.1	-1.05265	-1.07848	0	0
WNT2	3828.2	-0.92722	-0.94442	0	0
THSD4	3621.9	-0.97928	-1.00009	0	0
KIFC1	106.5	-2.31191	-2.62175	0	0
CD46	7304.4	0.75521	0.76442	0	0
ABHD14B	1036.8	-1.08736	-1.11568	0	0
UBE2C	88.9	-2.51708	-2.92059	0	0
PMAIP1	2662.5	3.10161	4.39297	0	0
LYNX1	2575.2	0.93594	0.95415	0	0
KIF2C	172.2	-1.87543	-2.0246	0	0
MINPP1	1030.4	1.10507	1.13692	0	0
AGO1	1053.3	-1.12685	-1.15956	0	0
TGFBRAP1	1740.4	0.92911	0.94687	0	0
C3	479.5	1.4926	1.56623	0	0
GBA	3264.1	0.83574	0.84856	0	0
GMCL1	476.3	-1.28526	-1.33757	0	0
C14orf1	896.7	-1.23618	-1.2807	0	0
HMGB2	438.4	-1.35129	-1.40411	0	0
SLC25A3	13487.3	-0.759	-0.76869	0	0
ARHGAP5	2331.9	1.18454	1.2237	0	0
XKR8	672.5	1.63251	1.73991	0	0
APCDD1	799.4	-1.83771	-2.00761	0	0
CDCA8	96.7	-2.42733	-2.83612	0	0
MYL9	28013.6	-1.20911	-1.25071	0	0
HEXB	7495	0.87668	0.89199	0	0
CD276	9657	0.83505	0.84831	0	0
SPATA18	2641.3	0.97371	0.99568	0	0
ZDHHC20	1046	-1.08333	-1.1122	0	0
TMPO	760.4	-1.36631	-1.42752	0	0
SLC6A8	1350.9	1.01318	1.03724	0	0
FAM129A	5290	1.00656	1.0303	0	0
ERCC2	1724.6	-0.9768	-0.99857	0	0
LDOC1L	2464.4	-0.90615	-0.92363	0	0
B4GALT1-AS1	96.1	2.32512	2.71658	0	0
SCUBE3	659.2	-1.57324	-1.67366	0	0
PNMA2	675.6	-1.44729	-1.52652	0	0
PITPNA	3858.8	1.07992	1.11044	0	0
HJURP	69.5	-2.61631	-3.20772	0	0
KRT7	4047	-1.23641	-1.28312	0	0
GSR	1563.9	-1.07258	-1.10345	0	0
SHCBP1	133.1	-2.20199	-2.49313	0	0
HIST1H2AC	659.5	1.19386	1.23737	0	0
MT1X	192.8	-1.69603	-1.82631	0	0
PCYOX1	5184.4	0.90323	0.92083	0	0
MTMR14	909.6	-1.0388	-1.06743	0	0
RPS27L	4490.8	0.7993	0.81142	0	0
MAP4K5	3213.5	1.12399	1.15937	0	0
ATP5C1	2700.4	-0.87675	-0.89341	0	0
GID4	659.7	1.13176	1.16835	0	0
DLST	3662.8	-0.73617	-0.74584	0	0
GNPNAT1	2637.6	0.99067	1.01546	0	0
ETS1	7413.8	0.78958	0.8015	0	0
TXNIP	14722.5	-1.04766	-1.07645	0	0
RRM2B	2744.7	1.27196	1.32562	0	0
CMTM3	1436.9	-0.98681	-1.0118	0	0
TKT	16692	0.67318	0.6806	0	0
SOS2	1112	1.02878	1.05597	0	0
PRKCA	4033.9	-0.88427	-0.90185	0	0
KIF18B	55.4	-2.72179	-3.45689	0	0
C12orf75	9825	-0.91783	-0.93738	0	0
IL1RAP	863.3	1.64861	1.77559	0	0
HIST2H2BE	338.5	1.44456	1.52255	0	0
SLC39A8	438.4	-1.40227	-1.47637	0	0
UBE2G2	1667	0.89586	0.91473	0	0
ADAMTS15	835.5	-1.77493	-1.94703	0	0
ENTPD6	1895.4	-0.80993	-0.82378	0	0
IL6R	393.2	1.44404	1.52324	0	0
FST	7757	1.22689	1.27632	0	0
SLC43A2	176.5	-1.85916	-2.06997	0	0
CAPRIN2	2284.1	-0.89972	-0.91875	0	0
FAM19A5	371.3	-1.35431	-1.42819	0	0
NOTCH1	1114.1	1.02237	1.05048	0	0
PLP2	1534.6	-0.95266	-0.97509	0	0
C10orf76	801.6	-1.00216	-1.02934	0	0
FAM167A	860.6	-1.2403	-1.29393	0	0
KCTD2	1235	-0.91068	-0.93057	0	0
NPC1	6823.5	0.84234	0.85782	0	0
ASF1A	442.8	-1.21579	-1.26591	0	0
NFIL3	1889	0.96723	0.99123	0	0
GK5	559.4	-1.16882	-1.21467	0	0
MDK	1470.5	-0.83591	-0.85119	0	0
SLC30A1	2123.2	0.94527	0.96787	0	0
CSGALNACT2	1980.5	1.09359	1.12988	0	0
OSBPL7	163	-2.22808	-2.65424	0	0
GJA1	6832.7	0.6807	0.6889	0	0
C19orf12	1334.1	0.9972	1.02423	0	0
E2F7	2170.3	0.91964	0.94071	0	0
THRB	449.1	-1.51866	-1.62559	0	0
SVIL	1643.4	0.91117	0.93179	0	0
RARG	2073.3	-0.95647	-0.98052	0	0
NELFE	1867.3	-0.77854	-0.79138	0	0
FAS	4543	1.139	1.18086	0	0
FHL3	1555.8	-0.90911	-0.9294	0	0
RPL7L1	2272.1	0.83739	0.85335	0	0
MCOLN1	756.6	0.96689	0.99168	0	0
BHMT2	1211.2	1.13917	1.18039	0	0
PLXNB1	1742.2	0.86071	0.87857	0	0
MAGED1	9805.4	-0.66113	-0.6689	0	0
PLK1	146.6	-2.079	-2.36423	0	0
REV3L	5313.3	1.03237	1.06319	0	0
CTBP1	2921.3	0.86402	0.88178	0	0
MID1	1492.2	1.03277	1.06413	0	0
RASA2	1668	0.99451	1.02221	0	0
CDC14B	1426	0.98101	1.00727	0	0
TMEM63B	1688.7	0.89423	0.91391	0	0
NAMPT	1837.4	1.27878	1.33957	0	0
PHLDA1	3609.6	1.26343	1.32269	0	0
PAK2	3585.7	-0.85291	-0.8705	0	0
SEC24A	3268.6	1.09102	1.12876	0	0
FCHO2	902.8	1.0806	1.11755	0	0
DIXDC1	1519.6	-0.94597	-0.97002	0	0
LIMS2	1913.9	-0.94319	-0.96722	0	0
RHOQ	3440.9	0.90677	0.928	0	0
C5orf51	2046.5	0.78088	0.79415	0	0
STK39	1264	-0.93154	-0.9546	0	0
PIP4K2A	2614.8	0.79097	0.80497	0	0
TSC22D3	1048	-1.09211	-1.12939	0	0
CBX5	2703.7	-1.00728	-1.03682	0	0
TMEM192	625.8	1.00555	1.03431	0	0
LRRC15	2409.9	-0.7979	-0.81259	0	0
CD164	11840	0.88929	0.90941	0	0
PSMB2	3210.3	-0.93686	-0.96061	0	0
IL17RD	260.2	-1.64862	-1.81446	0	0
OSGIN2	862.9	1.12082	1.16225	0	0
MYOCD	316.2	-1.39356	-1.48024	0	0
FGD5-AS1	3592.7	-0.77662	-0.79031	0	0
NDUFB5	1016.1	-0.91345	-0.93645	0	0
KDSR	3359	0.94337	0.9682	0	0
SERINC3	8677.6	0.68977	0.69916	0	0
PRDX6	17189.8	-0.69608	-0.70571	0	0
SPOCD1	2070.9	-0.88097	-0.90102	0	0
RPL22	2825	0.69653	0.70631	0	0
PPDPF	3848.4	-0.8123	-0.8279	0	0
EZR	2824.4	-0.94734	-0.97286	0	0
IVNS1ABP	2662.9	-0.92521	-0.94853	0	0
TUBA4A	286.3	1.31788	1.38557	0	0
LHFPL2	3170.7	0.96993	0.99723	0	0
ZDHHC3	2322.5	-0.77055	-0.78417	0	0
MKL1	1434.1	-0.85902	-0.87779	0	0
CELF2	548.5	1.29311	1.37009	0	0
TNFSF18	1592.4	-1.02743	-1.06015	0	0
PURB	2307.7	0.8723	0.89183	0	0
PRRX1	10317.2	0.69729	0.70722	0	0
AARD	179	-1.8908	-2.14127	0	0
COBLL1	1257.8	1.14904	1.19657	0	0
TP53I3	1339.7	-0.9386	-0.96434	0	0
ADGRL4	1258.3	0.90694	0.92911	0	0
MSH2	448.9	-1.13781	-1.18301	0	0
MYBL2	120.7	-2.0361	-2.34024	0	0
PHF19	777.2	-0.93743	-0.96249	0	0
OSBPL11	544.9	-1.10526	-1.14711	0	0
CDC5L	1338.3	-1.08626	-1.127	0	0
MMP11	438.8	1.39937	1.49041	0	0
AASDHPPT	802.5	-1.02753	-1.06154	0	0
TANC1	1193.3	0.89333	0.91473	0	0
DDIT3	2937.8	0.82365	0.8402	0	0
FOXN2	633.8	1.08752	1.129	0	0
AGPAT1	2554.1	-0.6804	-0.68997	0	0
TPX2	514.6	-1.16198	-1.20954	0	0
BAG4	357.4	-1.402	-1.49864	0	0
RRAGC	1369	1.01411	1.04715	0	0
MFAP4	23144.8	1.00718	1.03889	0	0
OSR2	2567.6	-0.7875	-0.80255	0	0
MCL1	14029.7	0.89658	0.91909	0	0
EIF5A2	626	1.14099	1.189	0	0
MTFMT	372.7	1.20678	1.26368	0	0
KCTD12	725.4	-1.11429	-1.15978	0	0
CTTNBP2NL	1915.8	-0.95252	-0.98041	0	0
COQ10B	1489.3	1.02636	1.06094	0	0
PACS1	4167.7	-0.8356	-0.85402	0	0
RYK	2181.6	0.76672	0.78083	0	0
SLC35B4	756.9	-0.99697	-1.02755	0	0
LINC01759	213.9	1.55258	1.69417	0	0
HAPLN3	508.2	-1.17975	-1.23628	0	0
MAFG	2313.2	0.79892	0.81501	0	0
RPL3	28371.2	-0.74911	-0.76241	0	0
PPARA	1683	0.89557	0.91858	0	0
TMEM87A	2530.1	1.02878	1.0642	0	0
UXT	1202.2	-0.81513	-0.83295	0	0
ACKR3	1256.1	-1.00784	-1.04259	0	0
TNFRSF21	807.4	1.50455	1.62626	0	0
FHL1	7521.9	-0.76739	-0.78188	0	0
SZRD1	8812.9	0.74885	0.76227	0	0
ANXA2	37518.5	-0.59351	-0.60011	0	1e-15
SPAG5	125	-1.76571	-1.96306	0	1e-15
MBOAT2	1102.1	-0.82606	-0.84508	0	1e-15
PDE1C	2109.5	0.81072	0.82805	0	1e-15
CRLF1	2339	-1.1278	-1.17687	0	1e-15
XPR1	2052.6	0.89303	0.91671	0	1e-15
CCL5	126.7	2.73345	4.98004	0	1e-15
F2RL2	1200.9	0.98762	1.02086	0	1e-15
GPC6	1578.8	-1.03095	-1.06972	0	1e-15
BOK	1230.4	-0.98069	-1.01202	0	1e-15
STEAP2	377.6	1.29531	1.36774	0	1e-15
CIC	4731.3	0.71252	0.72423	0	1e-15
POLH	1403.8	0.80402	0.82139	0	1e-15
CYP2U1	1017.2	0.91955	0.94546	0	1e-15
TBPL1	682.2	0.93643	0.9644	0	1e-15
SLC2A3	3952.8	0.82799	0.84625	0	1e-15
PLAGL2	671.7	0.96406	0.99364	0	1e-15
MYADM	6989.1	-0.74716	-0.76084	0	1e-15
ATP6V1H	1427.8	0.80636	0.82354	0	1e-15
ABHD5	1164.5	0.92064	0.94676	0	1e-15
MCAM	442.7	-1.53789	-1.67181	0	1e-15
DTX3L	4036.7	1.28193	1.35747	0	1e-15
FAM196B	289	-1.32387	-1.40597	0	1e-15
B3GNT9	1911.6	0.81215	0.83014	0	2e-15
FOXM1	611.6	-1.0301	-1.06745	0	2e-15
ALDH1B1	1037.1	-0.89462	-0.91872	0	2e-15
TNFRSF10A	152.1	1.6957	1.90983	0	2e-15
CLGN	275.5	1.38811	1.48072	0	2e-15
CCNC	1192.2	0.91546	0.94238	0	2e-15
DTL	69.5	-2.13325	-2.53926	0	2e-15
ARF4	13968	-0.71797	-0.7304	0	2e-15
RP5-1039K5.12	478.9	1.08781	1.13388	0	3e-15
JPH2	460.3	-1.33568	-1.42288	0	3e-15
NUFIP2	4150.1	0.85496	0.87622	0	3e-15
TSPAN2	1307.7	-1.10353	-1.15167	0	3e-15
CCDC50	4374.6	0.73959	0.75345	0	4e-15
ALDH1A1	14029.6	-0.79189	-0.80878	0	4e-15
IMPA1	322.7	-1.21792	-1.28363	0	4e-15
CDK13	2218.9	0.72492	0.73778	0	4e-15
RHOB	4167.4	-1.26605	-1.34078	0	4e-15
SLC39A11	315.6	-1.20907	-1.2723	0	4e-15
WASHC5	4184.2	0.71485	0.72723	0	4e-15
OMG	84.9	2.04282	2.49134	0	4e-15
TMEM217	115.9	1.70892	1.92639	0	4e-15
KCNC4	427	-1.07994	-1.12928	0	4e-15
NUP43	563.7	-1.01904	-1.05675	0	5e-15
CTSK	24919.7	0.69093	0.70215	0	5e-15
TOB1	1395.8	0.88708	0.91162	0	5e-15
CCNG1	7760.6	0.82116	0.84028	0	5e-15
ANXA1	15839.4	-0.64331	-0.65238	0	5e-15
IFIT1	22957.8	2.71695	5.34298	0	6e-15
GNAQ	2034.1	0.97045	1.00303	0	6e-15
CSRP1	11055.1	-0.8637	-0.88627	0	7e-15
NACAD	176.8	-1.77281	-2.03383	0	7e-15
KIF23	347	-1.24119	-1.30899	0	7e-15
DGKH	769.3	1.09747	1.14526	0	7e-15
RGS3	1741.8	1.16088	1.21813	0	7e-15
TMEM129	1299.3	-0.83714	-0.8581	0	8e-15
RP11-597D13.9	340.2	1.73667	1.9774	0	8e-15
ADAMTS10	583.7	-1.1268	-1.17934	0	8e-15
LITAF	7458.8	0.79401	0.81162	0	1e-14
GRN	20411.1	0.55632	0.56226	0	1e-14
MAP7	194.9	1.42032	1.53525	0	1.2e-14
RAB33A	185.4	1.47257	1.59468	0	1.5e-14
ANP32E	535.3	-1.06796	-1.114	0	1.7e-14
IQGAP3	96.4	-2.06715	-2.4651	0	1.8e-14
FZD7	3353.1	-0.6783	-0.68937	0	1.8e-14
MET	3229.8	0.8061	0.82493	1e-15	1.9e-14
RAP2B	1600.8	0.74146	0.75616	1e-15	2e-14
RBM18	1014.9	-0.86679	-0.89076	1e-15	2.1e-14
EVL	1007.4	-0.89838	-0.92519	1e-15	2.1e-14
SNAP23	1729	-0.71779	-0.73137	1e-15	2.3e-14
CDCA3	66.7	-1.99878	-2.34159	1e-15	2.5e-14
CA12	378.4	1.45095	1.5733	1e-15	2.5e-14
CDH6	1590.3	-0.78791	-0.80641	1e-15	2.8e-14
BLOC1S5	343.2	-1.22939	-1.30534	1e-15	2.8e-14
TIGD6	439.8	1.02812	1.06772	1e-15	2.8e-14
BIRC5	116.3	-1.91777	-2.22671	1e-15	3.3e-14
GTSE1	69.9	-1.999	-2.36338	1e-15	3.3e-14
SGK1	3722.1	0.93691	0.96827	1e-15	3.5e-14
GRINA	7437.9	0.66852	0.67934	1e-15	3.6e-14
DDAH2	1917.6	-0.67413	-0.68534	1e-15	3.8e-14
UBE2B	1401.8	0.75531	0.77118	1e-15	3.9e-14
SLC38A7	2482.3	0.63899	0.64837	1e-15	3.9e-14
FBXW4	778.2	-0.91157	-0.9407	1e-15	4e-14
EDEM2	836	-0.9374	-0.96924	1e-15	4e-14
IER3IP1	687.2	1.0425	1.08749	1e-15	4e-14
TRIP13	138.2	-1.53817	-1.6824	1e-15	4.9e-14
LAPTM4A	13053	-0.60507	-0.61316	1e-15	5e-14
EFEMP2	9668.4	-0.56407	-0.57064	2e-15	5.4e-14
CUEDC1	2179.2	0.64242	0.65217	2e-15	6e-14
BMP2K	1704	0.8034	0.82248	2e-15	6e-14
RP5-1148A21.3	127	1.81068	2.1144	2e-15	6.1e-14
PCSK6	169.7	-1.68523	-1.93535	2e-15	6.1e-14
LOXL1	6311	-0.67726	-0.68884	2e-15	6.9e-14
FAM64A	63.4	-2.20108	-2.81241	2e-15	6.9e-14
GALNT1	2873.2	0.76496	0.78163	2e-15	6.9e-14
IRF2BPL	3581.7	0.7745	0.79193	2e-15	7.1e-14
DDR1	2497.1	0.81044	0.83046	2e-15	7.6e-14
CETN2	1223.4	-0.75833	-0.77511	2e-15	8e-14
ALX3	236.9	-1.45793	-1.59325	2e-15	8.1e-14
NCAPG2	297.9	-1.27734	-1.36344	3e-15	8.7e-14
ENPP1	1095.1	-0.85896	-0.88358	3e-15	8.8e-14
SET	4701.7	-0.63522	-0.64485	3e-15	9.8e-14
F2RL1	1061.7	0.93641	0.97007	3e-15	1.01e-13
TFPI	3043.3	0.79688	0.81623	3e-15	1.03e-13
WFDC21P	256.9	-1.27904	-1.36685	3e-15	1.09e-13
L1CAM	314.3	1.17365	1.23897	3e-15	1.13e-13
CDCA5	100.9	-1.76926	-2.02901	4e-15	1.22e-13
SREBF2	8815.7	0.60466	0.61296	4e-15	1.35e-13
MAFB	76.9	2.3183	3.28717	4e-15	1.44e-13
CALM3	9960.1	-0.56088	-0.56751	4e-15	1.45e-13
MFSD1	3639.3	0.60044	0.60865	5e-15	1.55e-13
MEDAG	683.2	-0.92485	-0.95541	5e-15	1.56e-13
CAMK2N1	3457.1	0.83303	0.85565	5e-15	1.59e-13
MIR34AHG	423	1.39997	1.52593	5e-15	1.61e-13
LRRC25	34.8	2.34254	3.13347	5e-15	1.71e-13
LRP8	245.9	-1.40645	-1.52776	5e-15	1.75e-13
FBL	2320.5	-0.6532	-0.66386	5e-15	1.8e-13
TMEM198B	330.5	-1.44804	-1.58962	6e-15	1.85e-13
GEM	1750	0.68012	0.69221	6e-15	1.85e-13
HSPA2	607.4	-1.0924	-1.14562	6e-15	1.95e-13
ZBTB8OS	415	-1.02814	-1.07445	6e-15	2.01e-13
MFSD6	433.3	1.04463	1.09267	6e-15	2.09e-13
SLC23A2	939.4	0.83727	0.86049	7e-15	2.15e-13
PPP2R5A	1268.8	0.87691	0.90371	7e-15	2.17e-13
NOCT	395.2	1.54053	1.70865	7e-15	2.22e-13
XPOT	10097.7	0.56088	0.56763	7e-15	2.33e-13
LDLR	6022.7	0.88544	0.91292	7e-15	2.37e-13
PRKCE	696.5	0.86354	0.88957	7e-15	2.39e-13
SLC16A2	4286	0.5913	0.59921	8e-15	2.49e-13
AFF3	1090.4	-0.85478	-0.8795	8e-15	2.51e-13
KDM4B	1776.7	0.79801	0.818	9e-15	2.82e-13
DENND5B	587.4	0.9794	1.01783	9e-15	2.83e-13
PI16	113.5	-1.80459	-2.09879	9e-15	2.89e-13
BCL6	1746.3	1.01043	1.0527	9e-15	2.99e-13
SLC38A1	6905	0.74332	0.75943	9e-15	3e-13
ARHGAP19	220.7	-1.29605	-1.39216	1e-14	3e-13
NUSAP1	107.3	-1.72444	-1.94631	1e-14	3e-13
LOX	36339.8	0.56866	0.57577	1e-14	3.02e-13
C16orf52	623.5	0.97673	1.01568	1e-14	3.19e-13
MAP3K7CL	914.9	0.95493	0.99119	1e-14	3.28e-13
NPEPPS	3141.5	0.65466	0.66561	1.1e-14	3.37e-13
MOAP1	409	-1.05547	-1.1049	1.1e-14	3.42e-13
KIAA0355	1209.7	-0.7875	-0.80739	1.1e-14	3.44e-13
ARSB	2736.2	0.77828	0.79694	1.1e-14	3.53e-13
NRBP2	1153.4	-0.79513	-0.81542	1.2e-14	3.64e-13
SYNPO2	2950.1	-1.06044	-1.1095	1.2e-14	3.82e-13
PCDH7	778.7	-0.91824	-0.95053	1.3e-14	3.88e-13
EDA2R	1845.5	0.9517	0.9875	1.3e-14	3.92e-13
PTX3	13724.1	1.79354	2.09334	1.3e-14	4.03e-13
HEATR1	2457.8	0.75726	0.77471	1.3e-14	4.09e-13
TXLNA	4369.9	-0.62543	-0.63509	1.4e-14	4.15e-13
FAM180A	950.5	0.96807	1.00666	1.4e-14	4.16e-13
TMTC1	5836	0.69714	0.7106	1.4e-14	4.16e-13
MPC2	1384.3	-0.773	-0.79202	1.4e-14	4.33e-13
E2F3	1095.9	0.81012	0.83156	1.5e-14	4.68e-13
CDC6	122.7	-1.60463	-1.78354	1.6e-14	4.72e-13
ARL5B	879.8	1.29877	1.3967	1.6e-14	4.74e-13
CHD1	1277.4	0.8523	0.87747	1.6e-14	4.96e-13
PHLDA3	6289.9	0.65717	0.66849	1.7e-14	5.26e-13
SEPT8	2879.2	-0.59743	-0.60588	1.8e-14	5.37e-13
F2R	2773	0.68371	0.69652	1.8e-14	5.38e-13
INPP5A	1342.7	0.87334	0.9013	1.9e-14	5.59e-13
UHMK1	3801.7	0.80625	0.82737	1.9e-14	5.72e-13
SPOPL	448	1.0648	1.11476	2e-14	5.94e-13
PPP4C	2532.7	-0.71536	-0.73031	2.1e-14	6.41e-13
TGFB1	4662.5	-0.6267	-0.63656	2.2e-14	6.44e-13
IMPAD1	2994.5	0.80371	0.8247	2.2e-14	6.45e-13
NR2F1-AS1	983.8	0.75704	0.77444	2.2e-14	6.6e-13
TRIM68	309.1	-1.14396	-1.20976	2.3e-14	6.69e-13
TRAPPC6B	828.1	0.95359	0.99096	2.6e-14	7.66e-13
PLAUR	2595.2	0.64807	0.6591	2.7e-14	7.96e-13
PRELP	3222.1	0.76428	0.78282	2.8e-14	8.23e-13
SH3RF1	2843.5	0.96866	1.00721	3.1e-14	9.05e-13
TENM2	552.4	-1.09894	-1.15572	3.1e-14	9.15e-13
CDH13	1540.8	0.73536	0.75187	3.2e-14	9.28e-13
COL4A3BP	1214.7	0.80467	0.82606	3.2e-14	9.29e-13
SPCS3	4387.1	0.82443	0.8475	3.2e-14	9.41e-13
USP6NL	638.5	0.88274	0.91244	3.3e-14	9.51e-13
CHRAC1	545.5	-0.99306	-1.03602	3.4e-14	1.001e-12
MBNL1-AS1	567.8	-0.94677	-0.9836	3.5e-14	1.021e-12
RP3-428L16.2	264.9	-1.41065	-1.54655	3.7e-14	1.075e-12
C7orf50	1065.5	-0.76703	-0.78573	4e-14	1.146e-12
IFI44	1941.3	2.12155	2.74876	4.1e-14	1.19e-12
LZTS2	4159.1	0.8182	0.84118	4.2e-14	1.204e-12
PSMC5	3062.5	-0.62887	-0.63906	4.3e-14	1.227e-12
CCDC28A	340.4	-1.15255	-1.2259	4.3e-14	1.245e-12
COL5A3	11165.1	-0.96231	-1.00119	4.4e-14	1.273e-12
PIK3IP1	180.3	-1.56252	-1.75447	4.6e-14	1.329e-12
IL32	388.8	-1.11796	-1.18505	4.8e-14	1.373e-12
NSMAF	3399.9	0.7114	0.72626	4.8e-14	1.376e-12
WNT2B	456.5	-1.23355	-1.32106	5.2e-14	1.491e-12
TNS1	9758	-1.02888	-1.07683	5.9e-14	1.679e-12
LAMP3	44.4	2.30514	3.30918	6.1e-14	1.721e-12
CDV3	7283.4	0.6588	0.67073	6.3e-14	1.774e-12
RCAN1	4066.9	0.89825	0.92937	6.4e-14	1.81e-12
CNOT6	1250.5	0.70853	0.72309	6.5e-14	1.831e-12
HSPA4L	464.7	1.17857	1.25913	6.7e-14	1.877e-12
TOMM70	2592.2	-0.7815	-0.80201	6.7e-14	1.882e-12
ZBTB43	630.5	1.12543	1.19052	7.3e-14	2.055e-12
KIF4A	80	-1.8605	-2.19686	7.5e-14	2.101e-12
MBTD1	425.2	0.99176	1.03419	8e-14	2.247e-12
YRDC	705.3	0.81605	0.83845	8.2e-14	2.287e-12
FOSL2	3199	-1.12557	-1.19077	8.3e-14	2.301e-12
ENTPD5	947.6	-0.78324	-0.80419	8.3e-14	2.317e-12
CELF1	2824.4	0.68211	0.69542	8.5e-14	2.354e-12
GIPC1	3095.9	-0.63527	-0.6461	8.6e-14	2.394e-12
ZC3H7B	6342.4	-0.51992	-0.52577	9.2e-14	2.537e-12
EHD1	4992.7	-0.70549	-0.7204	9.6e-14	2.64e-12
PPP1R21	837.3	-0.93526	-0.97248	9.8e-14	2.712e-12
C11orf58	2751.9	0.66211	0.6744	9.9e-14	2.73e-12
TNKS2	4483.6	0.82974	0.85465	1.02e-13	2.806e-12
SFXN3	1325.2	-0.70214	-0.71748	1.05e-13	2.873e-12
KLF9	1502.9	0.99878	1.04375	1.08e-13	2.952e-12
ZC3HAV1	9854.6	2.15454	2.93494	1.09e-13	2.982e-12
PLEKHF1	576.8	0.8935	0.92508	1.09e-13	2.982e-12
ATP6V0B	2578.4	0.72178	0.73784	1.13e-13	3.07e-12
VASH1	484.2	-0.93103	-0.96719	1.19e-13	3.227e-12
RFK	702.6	1.07484	1.13192	1.2e-13	3.264e-12
KCMF1	2846.6	0.61069	0.62031	1.25e-13	3.399e-12
BROX	979.1	-1.00645	-1.05375	1.32e-13	3.561e-12
RP2	1109.3	1.20607	1.29051	1.39e-13	3.755e-12
ADRA1D	132.1	1.59224	1.80738	1.4e-13	3.785e-12
SCG5	257.3	1.13197	1.20003	1.43e-13	3.848e-12
TNC	69940.8	-0.83335	-0.85875	1.44e-13	3.878e-12
GNPDA1	1983.7	0.64981	0.66149	1.49e-13	4e-12
BUB1	110.4	-1.70906	-1.96653	1.51e-13	4.05e-12
CORIN	546.2	-1.40527	-1.54688	1.53e-13	4.095e-12
ITGA4	4481.5	0.68394	0.69779	1.54e-13	4.113e-12
PTPN4	652.7	0.90742	0.94055	1.55e-13	4.133e-12
SGCB	3352.9	0.72627	0.74285	1.59e-13	4.217e-12
PLD2	595	-1.03184	-1.08299	1.59e-13	4.217e-12
PBX3	1980.6	0.70608	0.72151	1.64e-13	4.354e-12
MPP5	1043.9	-0.71973	-0.73573	1.73e-13	4.576e-12
ACVR2A	1095.4	-0.78635	-0.80723	1.74e-13	4.593e-12
ABR	5287.5	0.67779	0.69123	1.76e-13	4.641e-12
EPHB3	411.1	-1.13329	-1.20094	1.77e-13	4.648e-12
WDR26	6449.5	0.60787	0.61754	1.81e-13	4.755e-12
SLC22A23	972.8	0.89759	0.92859	1.88e-13	4.938e-12
NEFM	201.2	-1.49014	-1.67196	1.89e-13	4.943e-12
ASIC1	303.5	-1.18852	-1.2731	1.95e-13	5.098e-12
TRAF4	1511.2	0.79918	0.82192	1.99e-13	5.195e-12
S100A10	6820.6	-0.87661	-0.90705	2.15e-13	5.601e-12
PYURF	1269.7	-0.79572	-0.81879	2.16e-13	5.608e-12
OASL	3593.1	2.43387	8.8403	2.25e-13	5.832e-12
CTSA	18178.5	0.51881	0.52483	2.31e-13	5.993e-12
RNLS	374.7	1.02483	1.07407	2.4e-13	6.218e-12
ATP6V1B2	4726.5	0.64515	0.65686	2.42e-13	6.266e-12
CYFIP2	293.3	1.3902	1.54995	2.55e-13	6.587e-12
SLC19A2	556.8	1.06771	1.12385	2.56e-13	6.607e-12
CD2BP2	2087.5	-0.68294	-0.69709	2.7e-13	6.955e-12
PRPF38A	984.4	-0.71978	-0.73605	2.72e-13	6.983e-12
PTPRM	4819.7	0.63344	0.64466	2.88e-13	7.395e-12
MEIS3	1823.6	-0.72605	-0.74329	2.95e-13	7.559e-12
SNX19	5192.5	-0.64252	-0.65431	3.04e-13	7.746e-12
ARL6IP5	2786.7	0.73529	0.75298	3.04e-13	7.746e-12
TRIB2	2332.6	-0.71945	-0.73612	3.05e-13	7.765e-12
RANBP9	2492	0.64489	0.65662	3.13e-13	7.956e-12
PBK	55.6	-1.93659	-2.34655	3.26e-13	8.287e-12
STRADB	547.4	0.98985	1.03657	3.31e-13	8.378e-12
C2orf49	573.6	-0.89775	-0.93233	3.56e-13	9.014e-12
RSPO3	274.8	1.1085	1.17249	3.58e-13	9.032e-12
NCAPH	39.8	-2.19549	-3.0523	3.59e-13	9.062e-12
ERC1	3271.5	0.83456	0.86129	3.86e-13	9.728e-12
BAG2	2794	-0.75155	-0.77065	4.09e-13	1.0288e-11
CLCA2	153.7	1.43274	1.60511	4.2e-13	1.0545e-11
RNF20	1560.7	-0.73885	-0.75741	4.48e-13	1.1237e-11
NADK2	571.4	-0.93166	-0.97107	4.56e-13	1.1416e-11
TIMM8B	516.7	-0.95059	-0.99147	4.63e-13	1.1568e-11
ELK3	4157.8	0.65628	0.66915	4.65e-13	1.1604e-11
FBXW2	3562.6	-0.61539	-0.62596	4.82e-13	1.2e-11
MEGF6	9062.4	-0.79428	-0.81734	4.84e-13	1.2024e-11
LRRN3	820.7	2.25116	3.42367	5.08e-13	1.2618e-11
IGDCC4	846.8	0.78445	0.80685	5.24e-13	1.2996e-11
NLN	1393.9	-0.72687	-0.74431	5.34e-13	1.3214e-11
ATF3	1656.8	2.3419	4.17711	5.58e-13	1.3782e-11
BCAR1	4281.4	0.59856	0.60816	5.61e-13	1.3851e-11
HMGN2	591.3	-0.86714	-0.89748	5.69e-13	1.4023e-11
IRF2BP2	2494.8	0.7253	0.74283	5.77e-13	1.419e-11
ZNF512	640.9	-0.8334	-0.86076	5.83e-13	1.4314e-11
FCHSD1	888	-0.74451	-0.76378	5.9e-13	1.4475e-11
YWHAG	9562.8	0.75832	0.77837	5.97e-13	1.4618e-11
ARHGEF3	437.8	0.98041	1.02582	6.14e-13	1.5012e-11
DYRK3	826.6	0.87488	0.90648	6.47e-13	1.5798e-11
LRP12	1261.7	0.72645	0.74424	6.59e-13	1.6066e-11
KATNAL1	1183	-0.81075	-0.83625	6.67e-13	1.6225e-11
DDX60	2058	1.73625	2.05902	6.89e-13	1.6729e-11
AFF4	6493.4	1.01142	1.06191	7.3e-13	1.7696e-11
CD83	147.2	-1.51399	-1.7507	7.65e-13	1.8517e-11
GPR1	443.8	1.19628	1.28011	7.71e-13	1.8642e-11
PTPN1	1894.4	0.59507	0.60456	8.07e-13	1.9488e-11
LACC1	723.1	1.01855	1.06941	8.16e-13	1.9664e-11
PXDC1	3203.5	-0.55199	-0.55979	8.24e-13	1.9843e-11
RBL2	1983.8	-0.62926	-0.64092	8.26e-13	1.985e-11
VPS26A	2328.7	0.73134	0.74923	8.55e-13	2.0516e-11
VBP1	992.2	-0.77082	-0.79269	8.62e-13	2.0631e-11
ZNF699	97.9	-1.64806	-1.93836	8.63e-13	2.0631e-11
C19orf48	586.8	-0.88435	-0.91648	8.64e-13	2.0631e-11
TSPYL4	839.3	-0.70794	-0.72425	9.12e-13	2.1758e-11
LIFR	826.8	1.04629	1.10311	9.7e-13	2.3092e-11
GLDN	147.6	1.30884	1.42203	1.117e-12	2.6539e-11
CD63	27749.4	0.49831	0.50396	1.118e-12	2.6539e-11
MATN3	66.3	-1.88728	-2.35939	1.123e-12	2.663e-11
LRIG1	2349.3	0.90272	0.93811	1.128e-12	2.6677e-11
POLR1D	1653	0.63529	0.64715	1.13e-12	2.6677e-11
COPS6	2902.5	-0.52801	-0.53475	1.13e-12	2.6677e-11
ZNF664	4018.3	-0.61424	-0.62505	1.143e-12	2.6902e-11
CFDP1	1043.1	0.74729	0.76695	1.143e-12	2.6902e-11
ADAM17	2455.4	0.75871	0.77922	1.163e-12	2.7313e-11
TMEM2	5267.4	0.74031	0.75968	1.265e-12	2.9687e-11
ACVR1B	1000	-0.75058	-0.77107	1.325e-12	3.1042e-11
SNX2	2340.4	0.8101	0.83557	1.338e-12	3.1286e-11
ACP5	111.4	1.70258	2.02026	1.464e-12	3.4184e-11
RAP2C	1060.8	-0.75725	-0.77846	1.654e-12	3.8574e-11
GDF5	315.4	1.47045	1.65219	1.658e-12	3.8606e-11
TSPAN18	128.8	-1.59116	-1.8354	1.695e-12	3.9408e-11
UCP2	40	-2.1122	-3.05967	1.701e-12	3.9487e-11
MCOLN3	204.8	1.18018	1.26475	1.723e-12	3.9953e-11
PRICKLE1	602.2	-0.95488	-1.0006	1.806e-12	4.1806e-11
CPEB2	1440.1	0.81124	0.83793	1.83e-12	4.2307e-11
UST	1190.1	0.74373	0.7636	1.88e-12	4.3406e-11
LPCAT3	1263.8	0.67767	0.69225	1.9e-12	4.3798e-11
IL11	1343.5	-0.71454	-0.73198	2.041e-12	4.6981e-11
TCEA1	1669.8	0.78101	0.80392	2.078e-12	4.7752e-11
KAT2B	418.5	1.08497	1.14945	2.159e-12	4.9549e-11
BUB1B	57.4	-1.9137	-2.3606	2.199e-12	5.0378e-11
TM4SF1	89.6	-1.63473	-1.90749	2.218e-12	5.0757e-11
DDB2	1290.2	0.93661	0.97919	2.244e-12	5.1274e-11
DUSP16	593.8	1.09425	1.1633	2.277e-12	5.1954e-11
TCF19	152.7	-1.38689	-1.52271	2.287e-12	5.21e-11
SLC4A4	340.7	-1.2144	-1.31438	2.366e-12	5.3826e-11
ANKRD10	931.6	0.75647	0.77795	2.484e-12	5.6423e-11
SNX16	527.5	0.86103	0.8926	2.509e-12	5.6902e-11
HELZ2	5163.7	1.54327	1.77131	2.56e-12	5.7992e-11
IFT57	2109	0.66697	0.68137	2.566e-12	5.8038e-11
QPRT	1501.9	0.6335	0.6457	2.649e-12	5.9839e-11
CLSPN	47.9	-2.02045	-2.68411	2.667e-12	6.0152e-11
ATP6V0D1	3791.5	0.57036	0.57917	2.695e-12	6.07e-11
VPS37A	2316.1	0.72368	0.74197	2.726e-12	6.1308e-11
THBS3	2763.1	-0.66653	-0.68096	2.737e-12	6.1462e-11
NUP58	1602.3	0.74052	0.76043	2.841e-12	6.3712e-11
DPYSL3	9378	-0.56809	-0.57687	2.88e-12	6.4492e-11
CDK4	4424.4	0.56732	0.57593	2.917e-12	6.5233e-11
AURKA	193.3	-1.33215	-1.45594	2.949e-12	6.5851e-11
CEBPB	3047	0.76604	0.78802	2.989e-12	6.6648e-11
KPNA3	2519.8	0.72754	0.74642	3.037e-12	6.7616e-11
PKIG	2820.5	0.64666	0.65972	3.052e-12	6.7874e-11
ZWILCH	338.8	-1.03618	-1.09437	3.27e-12	7.26e-11
SHROOM3	3176.1	-1.00727	-1.06027	3.295e-12	7.3055e-11
INPP1	1063.6	0.72917	0.74843	3.309e-12	7.327e-11
TMEM54	599.4	-0.83731	-0.86707	3.315e-12	7.3298e-11
FANCG	164.6	-1.3923	-1.549	3.39e-12	7.4858e-11
TMEM140	688.5	1.29319	1.41627	3.418e-12	7.5373e-11
KNL1	75.6	-1.87045	-2.33809	4.087e-12	8.9998e-11
ITGB3	218.1	-1.35312	-1.4968	4.123e-12	9.0665e-11
CNNM2	351.9	1.04718	1.10656	4.17e-12	9.1567e-11
GLO1	2936.8	0.59387	0.60404	4.347e-12	9.5306e-11
TROAP	40	-2.11577	-2.89942	4.362e-12	9.551e-11
SLC8A1	2338	-0.69616	-0.71293	4.388e-12	9.5944e-11
CTSD	7527.9	0.59349	0.6037	4.459e-12	9.7353e-11
AMPD3	418.9	0.99753	1.04999	4.573e-12	9.9707e-11
SNX9	10743.8	0.9166	0.95629	4.623e-12	1.00668e-10
DNAJB1	2644.2	0.59415	0.6044	4.651e-12	1.01128e-10
LMAN1	7503.5	-0.56472	-0.57357	4.735e-12	1.02817e-10
TRIM25	5123.5	0.95038	0.99522	4.824e-12	1.04601e-10
ZMYM2	2122.4	0.6255	0.63742	4.913e-12	1.06401e-10
CMYA5	151.5	1.4641	1.65541	4.933e-12	1.06673e-10
HDAC5	2375.9	0.75413	0.77557	5.018e-12	1.08366e-10
TMEM8A	4552.9	0.57604	0.5854	5.046e-12	1.08819e-10
PPM1D	824.1	0.77913	0.80384	5.415e-12	1.16631e-10
TET3	2166.2	0.79671	0.82202	5.442e-12	1.17039e-10
TNIK	617.2	1.22927	1.32879	5.553e-12	1.19268e-10
STC1	891	1.11494	1.19251	5.6e-12	1.20114e-10
IGF1	97.7	-2.00222	-2.69931	5.621e-12	1.20352e-10
MDM2	6511.9	1.42067	1.59843	5.626e-12	1.20352e-10
CCNF	206.6	-1.21325	-1.30979	5.711e-12	1.22e-10
CALCOCO1	4114.8	-0.54844	-0.55659	5.742e-12	1.22497e-10
KRT17	197.1	1.41488	1.59948	5.819e-12	1.23969e-10
TRIM22	4876.1	0.82851	0.85802	5.882e-12	1.25141e-10
IDH1	3798.9	0.62873	0.64087	5.95e-12	1.26409e-10
ARNTL	870.3	-0.83833	-0.86966	6.047e-12	1.28308e-10
ATP1A2	141	1.3853	1.52763	6.173e-12	1.30802e-10
ACTA2	24412.4	-1.66137	-1.96829	6.256e-12	1.32386e-10
ITSN2	1317.8	0.66072	0.67514	6.403e-12	1.35315e-10
TIGAR	1309.4	0.72298	0.74264	6.678e-12	1.40928e-10
SREK1IP1	728.2	0.89821	0.93608	6.733e-12	1.41912e-10
STC2	18940	0.61742	0.62917	6.968e-12	1.46659e-10
PPP1R14A	204.2	-1.28529	-1.4159	6.997e-12	1.47079e-10
FASN	6301.2	0.66689	0.6817	7.074e-12	1.48495e-10
TDRD7	896.7	1.14446	1.23291	7.095e-12	1.48744e-10
SLC47A1	128	1.38756	1.53218	7.174e-12	1.50039e-10
BCL2L1	4017.8	0.6142	0.62585	7.176e-12	1.50039e-10
ACSL4	3201.8	0.77639	0.79973	7.257e-12	1.51465e-10
EIF4EBP2	7246.4	0.74178	0.76245	7.263e-12	1.51465e-10
GCC2	1570.3	0.6682	0.68341	7.889e-12	1.64293e-10
TRHDE	1564.8	0.73705	0.75758	8.395e-12	1.74591e-10
ZSWIM6	707.9	-0.74472	-0.76646	8.776e-12	1.82136e-10
LIMD2	763.1	-0.77622	-0.801	8.78e-12	1.82136e-10
GUCY1A2	424.8	1.04522	1.11118	9.009e-12	1.86636e-10
SLFN11	1203.5	-0.93676	-0.98171	9.182e-12	1.89963e-10
VGLL4	1917.3	0.66003	0.67462	9.676e-12	1.99932e-10
TFAM	762.3	0.81614	0.84453	1.0029e-11	2.06865e-10
PPP1R13L	825	-0.91782	-0.95976	1.0038e-11	2.06865e-10
FLCN	1488	0.77788	0.80216	1.0695e-11	2.20115e-10
CBL	1820.9	0.65999	0.67445	1.1553e-11	2.37463e-10
MYO1D	7550	0.75692	0.77913	1.1871e-11	2.4367e-10
BTG1	2949.6	0.6784	0.6947	1.2429e-11	2.54811e-10
NEK10	178.6	1.24329	1.35458	1.2602e-11	2.58016e-10
LXN	868.7	-0.80594	-0.83278	1.3575e-11	2.77565e-10
INPPL1	6032.1	0.53795	0.54587	1.3706e-11	2.79899e-10
ZNF503	712.6	-1.11011	-1.18577	1.3764e-11	2.80718e-10
WDR34	805.8	-0.75526	-0.77823	1.3808e-11	2.8124e-10
DNASE1L1	909.7	-0.76864	-0.79188	1.4208e-11	2.8901e-10
NPR2	1293.9	-0.70604	-0.7248	1.4951e-11	3.03744e-10
TTLL11	228.9	-1.1888	-1.29594	1.5089e-11	3.06144e-10
RP1-152L7.5	183.6	-1.26551	-1.38161	1.5131e-11	3.06602e-10
FOSL1	3334.7	1.01724	1.07604	1.5309e-11	3.09604e-10
EMP2	665.8	-0.75173	-0.77429	1.5318e-11	3.09604e-10
CENPE	187.4	-1.30275	-1.43043	1.5363e-11	3.10116e-10
CBFB	1977.2	0.80794	0.83564	1.5677e-11	3.1604e-10
RB1CC1	2755.1	0.68714	0.70408	1.5772e-11	3.17548e-10
BATF2	676.9	1.94172	2.73026	1.6926e-11	3.4036e-10
VWA8	1044.5	0.80074	0.82765	1.7736e-11	3.56189e-10
TNFSF10	232.4	2.08745	3.65281	1.8228e-11	3.65608e-10
CCNB2	114.9	-1.44147	-1.61596	1.9165e-11	3.839e-10
RASGRP1	131.4	-1.44839	-1.64953	1.9465e-11	3.89424e-10
PROS1	686.1	0.88832	0.92627	1.9961e-11	3.98487e-10
SARAF	4985.8	0.52969	0.53733	1.9969e-11	3.98487e-10
COMMD10	567.4	0.76736	0.79155	2.2168e-11	4.41822e-10
CSPG4	5079.5	-0.92022	-0.9636	2.2706e-11	4.51978e-10
GRB2	1884.5	0.60536	0.61712	2.2761e-11	4.52489e-10
ASXL2	1613.5	-0.66282	-0.67795	2.2919e-11	4.55064e-10
MED13L	5711.9	0.8905	0.92945	2.3679e-11	4.69567e-10
MCM7	976.5	-0.79898	-0.82628	2.3805e-11	4.71456e-10
GNPTG	2193.9	0.60221	0.61369	2.3896e-11	4.72664e-10
ETV7	204.6	1.56368	1.86265	2.4626e-11	4.86493e-10
SENP6	3595.8	0.6024	0.61393	2.4687e-11	4.87101e-10
ASCC3	6502.1	-0.68027	-0.69726	2.55e-11	5.02502e-10
TOX	529.8	-1.21525	-1.3221	2.7676e-11	5.44707e-10
GNS	18862	0.56746	0.57709	2.8163e-11	5.53607e-10
C6orf62	6192.8	-0.79088	-0.81829	2.941e-11	5.77405e-10
ATP6AP1	4616.4	0.55228	0.56117	2.9685e-11	5.82068e-10
GPCPD1	1175.7	-0.82734	-0.8589	3.0205e-11	5.91529e-10
SCARF2	2119.6	0.71515	0.73501	3.035e-11	5.93631e-10
SLC17A5	2075.4	0.68564	0.7033	3.1746e-11	6.20171e-10
CMPK2	883.5	2.19656	4.8676	3.2132e-11	6.26931e-10
POR	1871.8	0.60023	0.61164	3.2393e-11	6.31242e-10
KIAA1522	641.1	-0.85246	-0.88698	3.3866e-11	6.59133e-10
DAB2	13265.1	0.46226	0.46746	3.5442e-11	6.8896e-10
WASL	1453.6	0.67033	0.68614	3.5885e-11	6.96703e-10
ERI1	378.8	-0.96429	-1.01548	3.957e-11	7.67317e-10
GALNT16	1020.3	-0.81917	-0.85032	4.0344e-11	7.81356e-10
RNF149	2118.6	1.45869	1.67511	4.0582e-11	7.85002e-10
CIT	179.9	-1.41604	-1.61349	4.2117e-11	8.13688e-10
AGPAT4	406.8	-0.84816	-0.88338	4.2185e-11	8.14002e-10
LARP1	10178.3	0.53932	0.5477	4.2252e-11	8.14298e-10
MAPK6	3388.4	0.6136	0.62594	4.2738e-11	8.22663e-10
LYRM2	916.1	0.70384	0.72219	4.2946e-11	8.25665e-10
PVR	4418.5	0.61899	0.63177	4.3942e-11	8.43789e-10
RNASEH2A	128.7	-1.28936	-1.42147	4.4736e-11	8.57975e-10
RHPN2	65.3	-1.72747	-2.16912	4.5024e-11	8.62457e-10
MORC3	1171.4	0.85037	0.88524	4.6048e-11	8.81003e-10
BACH1	3120.4	0.75181	0.77579	4.76e-11	9.09585e-10
ARL4C	792.8	0.90742	0.95134	4.8993e-11	9.35081e-10
PODNL1	612.8	-0.80926	-0.83827	4.9171e-11	9.37345e-10
ANKRD12	1329	0.80798	0.83772	4.9444e-11	9.41402e-10
LTBR	4858	0.49762	0.50423	5.0969e-11	9.69275e-10
MARCKSL1	880.2	-0.7534	-0.77694	5.117e-11	9.71928e-10
RPL22L1	1140.3	-0.89067	-0.92989	5.1336e-11	9.73893e-10
DHRS4-AS1	386.2	-0.87605	-0.91472	5.2189e-11	9.88899e-10
PAFAH2	472.4	-1.01808	-1.08173	5.3902e-11	1.02014e-09
PDGFC	2256.6	0.58119	0.59207	5.4088e-11	1.02243e-09
PENK	215.3	-1.24029	-1.3701	5.4361e-11	1.02634e-09
MSRB1	538.7	-0.8163	-0.8465	5.5232e-11	1.04154e-09
TMEM131	3939.2	0.53854	0.54707	5.6838e-11	1.07055e-09
HOXC11	343.5	-0.92497	-0.97099	5.7133e-11	1.07482e-09
RASSF3	1525.2	0.67513	0.6924	5.9923e-11	1.12597e-09
PLCD3	2851.8	0.60033	0.61221	6.021e-11	1.13e-09
PHLDB1	6387.9	-0.71615	-0.73678	6.4527e-11	1.2096e-09
LBH	2179.4	-0.64515	-0.66006	6.5394e-11	1.22439e-09
ARL10	1225	-0.70623	-0.72642	6.5662e-11	1.22795e-09
C5orf30	760.3	-0.85426	-0.89229	6.5772e-11	1.22856e-09
GMPR2	1326.4	-0.6684	-0.68538	6.6556e-11	1.24077e-09
TBC1D23	2360.1	0.61114	0.62386	6.6584e-11	1.24077e-09
GOSR2	2076.4	-0.66072	-0.67681	6.7105e-11	1.249e-09
RBSN	1324.8	-0.71055	-0.73092	6.7768e-11	1.25986e-09
SPRY2	1761.6	0.77407	0.80099	6.9329e-11	1.28736e-09
TMEM70	651.5	0.78198	0.80928	6.9876e-11	1.29599e-09
SNRPA	667	-0.76988	-0.79491	7.0074e-11	1.29814e-09
TLN2	2073.2	-0.74142	-0.76457	7.0838e-11	1.31074e-09
MGEA5	2940.2	-0.61514	-0.62804	7.1313e-11	1.31799e-09
HAUS5	162.6	-1.29674	-1.44411	7.2909e-11	1.34591e-09
PTTG1	206.2	-1.31645	-1.4612	7.3865e-11	1.36197e-09
NUDT21	2829.2	0.54568	0.55454	7.404e-11	1.36359e-09
ID4	400.1	-1.10106	-1.1816	7.413e-11	1.36366e-09
LYST	1705.4	0.80888	0.83942	7.6192e-11	1.39996e-09
NCF2	81	1.7824	2.30523	7.7783e-11	1.42754e-09
IDE	1440.3	0.65657	0.67254	7.8157e-11	1.43272e-09
YIPF6	1639.2	0.65505	0.67104	7.9726e-11	1.4598e-09
MFSD7	408.8	-0.87285	-0.91147	8.177e-11	1.49548e-09
PTPRU	3089.6	0.57438	0.58496	8.2697e-11	1.51068e-09
NEU1	2651.1	0.55111	0.56033	8.4037e-11	1.53338e-09
ATP1B1	522.7	-0.91319	-0.95823	8.5418e-11	1.55677e-09
KIF3A	344.5	0.95658	1.0076	8.5529e-11	1.557e-09
KRT80	73.4	-1.547	-1.8	8.758e-11	1.59251e-09
RPL15	17908.7	0.49606	0.5028	9.1278e-11	1.65784e-09
CKAP2L	84	-1.55175	-1.80163	9.5107e-11	1.72539e-09
SYNPO	990.5	-0.80075	-0.83043	9.65e-11	1.74865e-09
CTSB	68570.3	0.45281	0.45793	9.6788e-11	1.75184e-09
TRO	682.5	-0.72625	-0.74904	9.9175e-11	1.79299e-09
NAB2	4116.1	0.61493	0.62805	1.07268e-10	1.93709e-09
PITX2	300.4	-1.08478	-1.16226	1.07505e-10	1.93915e-09
AHNAK	34325.4	-0.81437	-0.84603	1.08473e-10	1.95226e-09
SELENOI	895	-1.0581	-1.13291	1.08479e-10	1.95226e-09
COMMD7	1746.9	0.61616	0.62932	1.08944e-10	1.95838e-09
C2orf68	470.9	-0.78774	-0.81652	1.13475e-10	2.03738e-09
C12orf4	962.3	-0.70735	-0.72828	1.13597e-10	2.03738e-09
MMP19	1006.2	-0.66763	-0.68448	1.13818e-10	2.03902e-09
TTK	48.2	-1.82288	-2.3485	1.15571e-10	2.06807e-09
RHEBL1	227	2.13168	4.17512	1.17543e-10	2.10099e-09
ZNF24	1953.7	0.61566	0.6289	1.21467e-10	2.16867e-09
MXRA8	16043.3	0.65638	0.6726	1.2338e-10	2.20032e-09
IFRD1	2455	0.56634	0.57654	1.26359e-10	2.25091e-09
POM121C	649.3	0.77831	0.80577	1.27495e-10	2.26857e-09
LDHA	16568.4	-0.56665	-0.57696	1.30996e-10	2.32825e-09
RASGRP2	67.9	-1.62099	-1.97853	1.31957e-10	2.34261e-09
EAF1	588.3	-0.73515	-0.75692	1.32101e-10	2.34261e-09
WISP2	281.6	0.93282	0.97852	1.35251e-10	2.39577e-09
LONP1	4847.4	0.56496	0.57512	1.36326e-10	2.4121e-09
MED28	1564.6	-0.57968	-0.59091	1.36566e-10	2.41364e-09
ABCA8	119.3	1.37194	1.55124	1.37223e-10	2.42254e-09
HSPB1	9531.9	-0.55837	-0.56824	1.40684e-10	2.48085e-09
PAMR1	6289.6	0.4959	0.50282	1.46868e-10	2.587e-09
CPSF4	955.9	0.67188	0.68918	1.49001e-10	2.6204e-09
EVA1A	1802.6	-0.56977	-0.5805	1.49096e-10	2.6204e-09
SLC35A3	428.2	0.94612	1.00167	1.50427e-10	2.64085e-09
DYRK1A	2004.6	0.55467	0.56428	1.50795e-10	2.64313e-09
FMR1	1089.4	0.93662	0.98824	1.50893e-10	2.64313e-09
C7orf43	743.4	0.76662	0.79345	1.57443e-10	2.75482e-09
ZNF654	794	0.79529	0.82553	1.58861e-10	2.77654e-09
CARD8	352.2	-0.97543	-1.03297	1.65979e-10	2.89728e-09
CLDN11	5710.5	0.77632	0.80409	1.66136e-10	2.89728e-09
MYO6	1755.8	0.64678	0.66259	1.68268e-10	2.93121e-09
GLCE	909.3	0.69663	0.71653	1.73045e-10	3.0111e-09
PPT2	238.1	-1.06589	-1.14816	1.73401e-10	3.01397e-09
KHSRP	4197	0.54577	0.55509	1.73692e-10	3.0157e-09
MED13	3490.3	0.6501	0.66604	1.78655e-10	3.09846e-09
GALNT11	785.7	-0.7679	-0.7944	1.79159e-10	3.10379e-09
JARID2	1426.5	-0.82632	-0.8611	1.8624e-10	3.22291e-09
POLA1	254.2	-1.00286	-1.06648	1.91189e-10	3.30247e-09
UFM1	3094	0.71002	0.73131	1.91256e-10	3.30247e-09
GPATCH11	387.1	-0.91709	-0.9657	1.92267e-10	3.3163e-09
GPR137C	191.9	1.13412	1.22424	1.94671e-10	3.35409e-09
FDX1	421.3	0.86718	0.90746	1.95284e-10	3.36097e-09
EHD3	3895.2	-0.70645	-0.72776	2.02336e-10	3.47855e-09
DHRS1	369.5	-0.86186	-0.90118	2.03951e-10	3.50249e-09
IGIP	203.7	1.18203	1.29638	2.07233e-10	3.55498e-09
KIF14	77.6	-1.56694	-1.8379	2.09349e-10	3.58738e-09
MARCH5	1595.6	0.76379	0.79047	2.09897e-10	3.59286e-09
ASPM	201.6	-1.1664	-1.26277	2.14324e-10	3.66466e-09
HNRNPA1	1660.9	0.68311	0.70197	2.14886e-10	3.6703e-09
STAT5A	419.6	-0.83105	-0.86702	2.17773e-10	3.71557e-09
NCOA6	1766.5	0.53921	0.54827	2.21454e-10	3.7743e-09
DIO2	1679.3	-0.64778	-0.66322	2.21869e-10	3.77729e-09
WLS	3618.5	0.48642	0.49313	2.36963e-10	4.0299e-09
LGALS3BP	3002	-0.66566	-0.68329	2.37716e-10	4.03835e-09
CACUL1	1895	0.73417	0.75783	2.38702e-10	4.05073e-09
SLC35A5	938.6	-0.74028	-0.76489	2.41468e-10	4.09328e-09
WWP2	1163.8	-0.62456	-0.63929	2.50313e-10	4.23865e-09
FLNA	129560	-0.67582	-0.69419	2.52246e-10	4.26681e-09
INPP5F	1123.3	-0.67067	-0.68937	2.53202e-10	4.27837e-09
TGM2	5376	-0.74713	-0.77208	2.63385e-10	4.44567e-09
TNFRSF12A	8733.4	-0.54447	-0.55399	2.7702e-10	4.67082e-09
KLHDC7B	238.9	1.43338	1.64984	2.81629e-10	4.74346e-09
RFC4	195.6	-1.10743	-1.19883	2.86453e-10	4.81956e-09
BAHD1	770	-0.74859	-0.77442	2.88577e-10	4.85013e-09
HDLBP	41088	-0.49752	-0.50475	2.96387e-10	4.97608e-09
WRNIP1	1408.4	0.57295	0.58404	3.0179e-10	5.0614e-09
IGSF3	163.4	-1.17042	-1.28161	3.03777e-10	5.08931e-09
PAFAH1B2	2090.5	-0.6197	-0.63393	3.05037e-10	5.10499e-09
SNRK	756.9	-0.83128	-0.86891	3.07284e-10	5.13715e-09
TRPC6	355.4	-0.90088	-0.94652	3.09068e-10	5.16149e-09
ATF5	615.8	1.09968	1.18873	3.10622e-10	5.18197e-09
ASF1B	63.1	-1.61967	-1.94247	3.13571e-10	5.22563e-09
CDC40	664.5	-0.68804	-0.70814	3.201e-10	5.3288e-09
GTPBP1	1863	0.92311	0.97312	3.26818e-10	5.4349e-09
NSD2	1728.9	-0.54181	-0.55108	3.31379e-10	5.50495e-09
TCAIM	523.7	-0.87629	-0.92094	3.35372e-10	5.56542e-09
CERS2	5319.8	0.52444	0.53297	3.46988e-10	5.75211e-09
DDIAS	50.2	-1.67964	-2.1024	3.6183e-10	5.99186e-09
OSBPL8	4435	0.68488	0.70441	3.62551e-10	5.99751e-09
ZMYND19	604.4	0.79323	0.82429	3.66895e-10	6.05743e-09
PLA2G4A	698.5	1.66467	2.09975	3.66943e-10	6.05743e-09
CYBRD1	24030.4	0.55309	0.56319	3.70156e-10	6.1041e-09
ANGPTL2	8072.5	1.32173	1.49264	3.71203e-10	6.11497e-09
TGFB1I1	4243.9	-0.57515	-0.58648	3.71684e-10	6.11649e-09
PSMG1	750.8	0.6527	0.66908	3.97203e-10	6.52962e-09
H2AFY2	214.6	-1.21351	-1.34242	3.99642e-10	6.56286e-09
PIK3C2B	94.8	-1.75384	-2.29804	4.03927e-10	6.62633e-09
MAVS	3931.6	0.55701	0.56737	4.04494e-10	6.62873e-09
MSC-AS1	1214.6	0.82859	0.86386	4.09881e-10	6.71004e-09
EFNB2	1030.4	-0.70707	-0.72866	4.12174e-10	6.74058e-09
NFS1	424.3	-0.78458	-0.81522	4.20386e-10	6.86776e-09
TMEM106A	397.8	-0.91117	-0.96025	4.30303e-10	7.01742e-09
FBXW7	1120.6	0.64686	0.6635	4.30437e-10	7.01742e-09
TMEM64	864.2	0.66044	0.67796	4.33047e-10	7.05268e-09
TPBG	5354.3	0.50965	0.51762	4.43296e-10	7.21215e-09
SNX7	1175.8	-0.75179	-0.77867	4.47367e-10	7.27087e-09
MED22	1026.7	-0.67718	-0.69618	4.67171e-10	7.58491e-09
CEP78	362.6	-0.89136	-0.93722	4.71831e-10	7.65269e-09
KPNA5	185.6	1.26172	1.4034	4.7282e-10	7.66084e-09
CHMP2B	2042.7	0.62778	0.64302	4.79925e-10	7.76798e-09
ZBTB26	220	-1.05639	-1.13899	4.80477e-10	7.76895e-09
ZNF451	1248.9	0.58666	0.59899	5.0164e-10	8.10282e-09
RAI1	1706.2	0.64504	0.66143	5.08407e-10	8.20372e-09
CD44	32394.4	0.47858	0.48518	5.3001e-10	8.54356e-09
IRAK2	303.9	0.93075	0.9836	5.32344e-10	8.57243e-09
PIAS2	744.9	0.69246	0.71335	5.36374e-10	8.62275e-09
IFIH1	2801.4	2.00827	3.44241	5.36563e-10	8.62275e-09
PNRC2	1062.2	0.62881	0.64433	5.45961e-10	8.76483e-09
GLMP	3608.2	0.67794	0.69726	5.51204e-10	8.84001e-09
PRKX	332.2	0.94503	1.00755	5.67922e-10	9.09886e-09
G6PD	6154.4	-0.44979	-0.45529	5.81643e-10	9.30924e-09
AC092066.1	351.5	0.83872	0.87564	5.8348e-10	9.32917e-09
SMURF2	6171.3	0.4912	0.49844	5.93741e-10	9.48362e-09
FNDC4	362.6	0.80418	0.83688	6.07146e-10	9.68792e-09
NCS1	3829.1	0.71444	0.73745	6.21059e-10	9.8999e-09
ACTG1	88900.2	-0.64819	-0.66491	6.22196e-10	9.908e-09
CUL5	1622.5	0.60797	0.6219	6.37123e-10	1.01266e-08
PUM2	3119.6	0.53682	0.54632	6.37211e-10	1.01266e-08
KIF13A	3687.2	0.67016	0.68884	6.40226e-10	1.01643e-08
NRAS	3958.6	0.63953	0.65569	6.41633e-10	1.01764e-08
PIDD1	904.9	1.03413	1.11248	6.68091e-10	1.05854e-08
CDK2AP1	3313.1	-0.52451	-0.53347	6.73839e-10	1.06657e-08
HTRA3	1009.7	-0.76292	-0.79123	6.87752e-10	1.0875e-08
ZDHHC1	425.1	0.77951	0.81005	6.92173e-10	1.0934e-08
PYROXD2	283.6	-1.0463	-1.12645	6.95446e-10	1.09747e-08
SLC20A2	1986.9	-0.818	-0.85311	6.98274e-10	1.10083e-08
MSANTD3	2557.7	0.58698	0.59961	7.00594e-10	1.10338e-08
CHORDC1	681	0.77284	0.80201	7.05701e-10	1.11032e-08
PGPEP1	786.5	0.87528	0.91976	7.1145e-10	1.11825e-08
FUOM	222.5	-1.06322	-1.14812	7.48469e-10	1.17526e-08
GLI2	1228.5	-0.70759	-0.73029	7.73322e-10	1.21308e-08
PCDH18	8833.4	-0.74621	-0.7729	7.95085e-10	1.24598e-08
PPM1A	1403.6	0.61499	0.62993	8.06823e-10	1.26311e-08
KCTD7	561.7	-0.83942	-0.87824	8.22442e-10	1.28539e-08
AVL9	2014.7	0.54553	0.55539	8.22681e-10	1.28539e-08
SESN3	139.1	-1.49151	-1.78538	8.27362e-10	1.29142e-08
FAM83D	75.8	-1.50217	-1.75002	8.38943e-10	1.3082e-08
MAP2K2	3382.5	0.53388	0.54334	8.50652e-10	1.32515e-08
NCOA4	7419.7	0.5779	0.58993	8.62023e-10	1.34154e-08
KIF11	192.7	-1.1318	-1.22902	8.66803e-10	1.34765e-08
MAT2A	6875.2	-0.49445	-0.50193	8.71046e-10	1.35291e-08
BRI3	3490.5	0.53438	0.54391	8.82013e-10	1.3686e-08
HDGF	7274.9	0.4362	0.4413	8.94825e-10	1.38711e-08
HTATIP2	1125.3	0.672	0.6916	8.98758e-10	1.39184e-08
SFRP4	100.6	1.36381	1.58678	9.14235e-10	1.41442e-08
YES1	1914.5	0.65575	0.6736	9.18958e-10	1.42033e-08
UBE2E1	1870.8	0.54944	0.55966	9.36164e-10	1.44551e-08
LARP6	3405.1	0.54281	0.5528	9.6369e-10	1.48655e-08
CUL3	2925.6	0.549	0.55935	9.66937e-10	1.4901e-08
ASAH1	4957.8	0.55212	0.56264	9.82484e-10	1.51258e-08
C9orf69	2815.8	0.56047	0.57156	1.00428e-09	1.54464e-08
BDH2	593.2	0.68281	0.70269	1.01414e-09	1.55828e-08
MRS2	590.5	-0.70079	-0.72342	1.01638e-09	1.5602e-08
PLEKHG1	193.5	1.13174	1.24301	1.01829e-09	1.56121e-08
URM1	2033	-0.54776	-0.55814	1.01902e-09	1.56121e-08
TMED8	895.4	0.73666	0.76279	1.0265e-09	1.57114e-08
FAM198B	2198.8	0.54891	0.55981	1.06713e-09	1.63174e-08
FLOT2	1320.7	0.57536	0.58723	1.07122e-09	1.63641e-08
MAPK8	1434	0.62334	0.63868	1.07758e-09	1.64454e-08
THAP9-AS1	504.8	0.76004	0.78942	1.0857e-09	1.65533e-08
ZZZ3	2384.6	0.56083	0.57191	1.09002e-09	1.66031e-08
TRIM21	1494.7	0.95742	1.019	1.10111e-09	1.67559e-08
DHX58	936.4	0.96182	1.02179	1.10243e-09	1.67597e-08
ARHGAP12	1623.6	0.56473	0.57619	1.117e-09	1.69648e-08
SLC50A1	582.8	-0.74799	-0.7757	1.12576e-09	1.70814e-08
DIRC2	616.2	0.74876	0.77562	1.13426e-09	1.71842e-08
SMC1A	2096.2	0.55989	0.5711	1.13471e-09	1.71842e-08
POLD2	1935.5	0.52049	0.5293	1.16111e-09	1.75671e-08
KCNMA1	4156	0.56089	0.57224	1.16526e-09	1.7613e-08
MAPK14	1915.9	-0.52475	-0.53385	1.1703e-09	1.76722e-08
ELP5	747.6	-0.65108	-0.66864	1.17142e-09	1.76722e-08
GLTSCR1L	897	0.68632	0.70709	1.17316e-09	1.76815e-08
FGFR1	15185.1	0.53112	0.54062	1.18145e-09	1.77895e-08
ATF6	2996.5	0.60312	0.61716	1.22396e-09	1.84119e-08
MACROD2	92	-1.38947	-1.61235	1.22842e-09	1.84614e-08
SAMD11	3000.7	-0.80227	-0.83676	1.2943e-09	1.9433e-08
MAPK13	656.6	0.68421	0.70545	1.30011e-09	1.95017e-08
MTX3	615.6	0.79175	0.82569	1.31314e-09	1.96783e-08
PPP1R12C	3232.1	0.4959	0.5036	1.31501e-09	1.96877e-08
C14orf132	1983.3	-0.60986	-0.62444	1.31981e-09	1.97409e-08
STEAP1	472.4	0.9703	1.03299	1.34218e-09	2.00564e-08
CLCN7	3824.7	0.5326	0.54226	1.37635e-09	2.05331e-08
ZFAND5	5195.1	0.60611	0.62048	1.37669e-09	2.05331e-08
PRKAR1A	7426.7	0.4918	0.49934	1.38054e-09	2.05711e-08
AP5Z1	2158.5	0.5649	0.57641	1.38524e-09	2.06217e-08
ISLR	1148.3	-0.87286	-0.91824	1.39811e-09	2.07936e-08
EXTL1	55	-1.76778	-2.42492	1.40723e-09	2.09095e-08
CDT1	50.1	-1.646	-2.04076	1.41714e-09	2.10369e-08
ADSS	2157.6	0.68513	0.70617	1.42906e-09	2.1194e-08
MAML1	1893.1	0.51254	0.52107	1.4571e-09	2.15895e-08
TIMM44	1082.3	-0.62952	-0.64577	1.49126e-09	2.20748e-08
AMDHD2	566.1	0.8533	0.89521	1.51326e-09	2.23794e-08
STX16	1649.4	0.54564	0.55589	1.54638e-09	2.28478e-08
PPP2R1A	9736.5	0.45839	0.46451	1.61791e-09	2.38824e-08
TSPAN31	723	-0.69941	-0.7224	1.62517e-09	2.3967e-08
FZD8	829.7	-0.82925	-0.86854	1.637e-09	2.4119e-08
ANKS6	1015.3	-0.58856	-0.60217	1.64528e-09	2.42184e-08
FBXO10	370.1	0.79305	0.82547	1.66668e-09	2.45105e-08
HTR7P1	248.1	-1.0113	-1.08572	1.6957e-09	2.4914e-08
XIRP2	25.4	1.942	3.57798	1.72549e-09	2.53281e-08
MKRN1	2384.8	0.54397	0.55444	1.73503e-09	2.54444e-08
KCTD11	1088.5	-0.62924	-0.64563	1.73748e-09	2.54567e-08
FAM213B	372.5	-0.95151	-1.01204	1.77339e-09	2.59587e-08
YBX3	5956.3	0.55089	0.56178	1.77564e-09	2.59675e-08
PCMTD2	774.8	-0.77486	-0.80745	1.77915e-09	2.59947e-08
PTCHD4	56.5	1.71794	2.38701	1.78482e-09	2.60534e-08
ZBTB7A	2266.5	0.61295	0.6281	1.82245e-09	2.65781e-08
CPD	11825.1	0.58135	0.59418	1.86365e-09	2.71538e-08
PPP4R3A	2455.5	0.54875	0.55958	1.86907e-09	2.72076e-08
PLEKHM2	6222	0.62465	0.64073	1.87463e-09	2.72634e-08
SAPCD2	31.7	-1.89177	-2.76389	1.87742e-09	2.72789e-08
BCOR	635.3	-0.75215	-0.78082	1.88332e-09	2.73394e-08
AGPS	1918.7	0.60626	0.62091	1.91562e-09	2.77827e-08
BMPER	2957.6	0.63042	0.64717	1.94317e-09	2.81563e-08
SLC39A6	4334.8	0.55967	0.57111	1.95097e-09	2.82434e-08
SLC9A1	3976.5	0.59297	0.6067	1.9892e-09	2.87703e-08
RAD21	5070.5	-0.55433	-0.56546	2.02213e-09	2.92198e-08
PRMT5	1933.3	-0.55768	-0.56902	2.0264e-09	2.92548e-08
PTMS	6392.8	-0.48325	-0.49054	2.03415e-09	2.9321e-08
PDLIM7	8562.7	-0.53509	-0.54505	2.03471e-09	2.9321e-08
DYRK2	1917.2	0.65816	0.67714	2.04304e-09	2.94142e-08
MTMR1	1187.6	0.58221	0.59525	2.04774e-09	2.9455e-08
RTKN2	120.7	-1.31018	-1.48395	2.0929e-09	3.00771e-08
ARL8B	3266.7	0.54845	0.55927	2.11294e-09	3.03374e-08
DACT3	613.6	0.68567	0.70762	2.11825e-09	3.0386e-08
MCU	997.2	-0.67275	-0.69286	2.13502e-09	3.05751e-08
TRIM2	1431.2	0.78204	0.81493	2.13531e-09	3.05751e-08
SRD5A1	769.4	0.6877	0.70969	2.18202e-09	3.12155e-08
MYH10	4892.1	-0.70891	-0.73293	2.19064e-09	3.13104e-08
SH3BP4	4300.3	-0.60987	-0.62515	2.25757e-09	3.22379e-08
CDCA2	85.2	-1.41429	-1.65306	2.30347e-09	3.28635e-08
PKD1	7498.9	0.51214	0.52092	2.32244e-09	3.31043e-08
ESPL1	99.1	-1.29034	-1.45316	2.33107e-09	3.31972e-08
TIMELESS	404.7	-0.77323	-0.80427	2.33445e-09	3.32154e-08
FAM20A	789.5	-0.90498	-0.95716	2.36391e-09	3.36004e-08
DCAKD	619	-0.74842	-0.77716	2.36577e-09	3.36004e-08
TIMP2	57390.9	0.40697	0.41134	2.39318e-09	3.3959e-08
HERC5	1835.2	1.97739	6.6358	2.41803e-09	3.42807e-08
TRMT61B	319.6	-0.89205	-0.94436	2.51049e-09	3.55597e-08
NDE1	869.6	-0.71886	-0.74466	2.5536e-09	3.61378e-08
LNPK	1037	0.62517	0.64161	2.57522e-09	3.64111e-08
RNF185	2120.6	0.61965	0.63557	2.59497e-09	3.66574e-08
NEMP1	542.6	0.91394	0.96773	2.62008e-09	3.69791e-08
RP11-366L20.2	25	1.94668	3.4729	2.62598e-09	3.70292e-08
GNG5	1963.9	0.58096	0.59413	2.64398e-09	3.72497e-08
RCN3	4485.3	-0.56576	-0.57788	2.70503e-09	3.80758e-08
IL1A	21.4	1.91647	3.29831	2.74199e-09	3.85615e-08
CRIP2	495.2	-0.8188	-0.85855	2.75231e-09	3.86721e-08
HCFC1R1	1394.7	-0.74263	-0.77116	2.75706e-09	3.87044e-08
SLC30A5	2759.9	0.53102	0.541	2.7804e-09	3.89973e-08
NRROS	42.4	1.75599	2.43401	2.86105e-09	4.00929e-08
MICALL1	4353.1	0.53434	0.54453	2.88845e-09	4.04409e-08
ZNF853	130.4	-1.22623	-1.37597	2.92037e-09	4.08514e-08
PLAGL1	1458.1	0.54053	0.55094	3.07426e-09	4.2966e-08
NIPAL2	1655.4	0.55716	0.56871	3.10906e-09	4.34139e-08
CCNG2	703	-0.69004	-0.71344	3.14449e-09	4.38698e-08
ELF1	2104.4	0.93067	0.98982	3.19786e-09	4.4575e-08
RAB21	1401.3	0.56694	0.5794	3.31907e-09	4.62237e-08
THEMIS2	850.9	1.9143	3.30195	3.33305e-09	4.63773e-08
CFD	636.4	-0.76352	-0.79375	3.37427e-09	4.69094e-08
CPED1	1535.5	0.63963	0.65773	3.4524e-09	4.79534e-08
RBM24	158.3	-1.17356	-1.32793	3.4891e-09	4.84205e-08
NUP85	690.5	-0.76642	-0.79799	3.49771e-09	4.84973e-08
ZNF721	313	0.93717	0.99844	3.50344e-09	4.8534e-08
TPM2	32217.2	-0.63702	-0.65469	3.51459e-09	4.86457e-08
MAP4	16778.1	-0.54889	-0.56005	3.56784e-09	4.93394e-08
MTHFD1	1451.5	-0.53753	-0.54786	3.59688e-09	4.96975e-08
SOCS7	997.4	0.58658	0.60007	3.62528e-09	5.0046e-08
KDM6B	1281.6	0.69694	0.7201	3.71858e-09	5.1289e-08
SERPINB7	411.5	-1.65815	-2.18283	3.75171e-09	5.17009e-08
RTN2	451.9	-0.74254	-0.77298	3.75842e-09	5.1748e-08
SELENOF	4799.4	0.55833	0.57014	3.77387e-09	5.19155e-08
MTCH1	9895.1	-0.43214	-0.4375	3.88209e-09	5.33575e-08
GDNF	359.7	1.1349	1.25859	3.89601e-09	5.35023e-08
SGSH	1846.4	0.59142	0.60554	3.90108e-09	5.35253e-08
SMAP1	1033.8	-0.57845	-0.5922	3.9189e-09	5.3723e-08
PKMYT1	34.9	-1.78305	-2.43792	3.93484e-09	5.38946e-08
GRB10	2637.1	-0.55957	-0.57167	4.07021e-09	5.57004e-08
RCAN3	456.7	-0.7417	-0.77087	4.09406e-09	5.59782e-08
SIKE1	1309	-0.56673	-0.5791	4.15662e-09	5.67844e-08
FANCD2	60.2	-1.52495	-1.85031	4.17664e-09	5.70084e-08
ZFP36L2	6371.9	1.38135	1.61671	4.18152e-09	5.70256e-08
CASK	1760.1	0.64125	0.65969	4.1921e-09	5.71205e-08
PRIM1	41.4	-1.77531	-2.55193	4.39356e-09	5.98139e-08
INSIG1	4224	0.87436	0.92306	4.42078e-09	6.01326e-08
CENPU	44.6	-1.68368	-2.17751	4.44446e-09	6.04025e-08
SLC26A11	482.8	0.82461	0.86318	4.51493e-09	6.13074e-08
HLA-B	20560.9	-0.5459	-0.55708	4.55511e-09	6.17997e-08
ETS2	895	0.759	0.7905	4.62888e-09	6.27466e-08
SCRIB	2671.7	0.6198	0.63645	4.65142e-09	6.2998e-08
SBF1	6133.3	0.4649	0.47171	4.73836e-09	6.41204e-08
TACC2	496.6	-0.78692	-0.82355	4.77206e-09	6.4521e-08
COX20	574.4	-0.7388	-0.76688	4.7991e-09	6.48311e-08
CENPBD1P1	1448	0.55336	0.56506	4.91257e-09	6.62772e-08
ROGDI	270	-0.87186	-0.9192	4.91456e-09	6.62772e-08
FAM102A	1971.4	0.49349	0.50162	4.9637e-09	6.68827e-08
C21orf91	760.1	1.59182	2.0377	5.19779e-09	6.9977e-08
PHF14	797.4	-0.6267	-0.64463	5.22771e-09	7.03199e-08
HHIP	190.6	-1.33436	-1.61207	5.27334e-09	7.08732e-08
HP1BP3	4235.8	0.45143	0.4577	5.30877e-09	7.12885e-08
CNPY3	1194.7	-0.54754	-0.55888	5.3313e-09	7.15302e-08
SERPINB8	2741.7	-0.59987	-0.61499	5.37857e-09	7.21031e-08
PRR16	1083.7	-0.7916	-0.82787	5.42096e-09	7.25544e-08
MAP9	739	0.74037	0.76955	5.42145e-09	7.25544e-08
HK2	3092.7	1.42233	1.70317	5.45203e-09	7.29018e-08
COL14A1	5553.5	0.56455	0.57704	5.46205e-09	7.29739e-08
MORF4L2	10352.2	0.52351	0.53345	5.64093e-09	7.53e-08
TRPM4	885.2	-0.72497	-0.75275	5.82027e-09	7.75957e-08
FBXO22	1418.5	0.53883	0.54988	5.82275e-09	7.75957e-08
MIR22HG	3850.2	-0.50262	-0.51136	5.9436e-09	7.91393e-08
UBE3A	2653.9	0.51978	0.52949	6.02021e-09	8.00916e-08
CLPP	876.6	-0.60702	-0.62301	6.05764e-09	8.05217e-08
STXBP1	1214.2	0.52216	0.53195	6.12316e-09	8.13241e-08
MAGED2	7584.5	-0.47733	-0.48485	6.16788e-09	8.1849e-08
DPP8	1318.1	-0.74176	-0.77122	6.2502e-09	8.28717e-08
SGK3	165.5	1.07498	1.17731	6.26867e-09	8.30467e-08
VWA1	44.8	-1.64788	-2.22922	6.40772e-09	8.48175e-08
CEACAM1	27	1.89067	3.59891	6.51673e-09	8.61881e-08
NEK2	26.6	-1.84093	-2.70483	6.63656e-09	8.76994e-08
MKRN2	1404	0.52023	0.53005	6.93558e-09	9.15576e-08
SNX8	1659.2	0.69819	0.72268	6.94014e-09	9.15576e-08
RPL5	18876.9	0.45694	0.46354	6.97e-09	9.18746e-08
SCARB1	1292.2	0.61309	0.62937	7.11302e-09	9.36815e-08
DDX58	5146.4	1.79353	2.71035	7.15105e-09	9.41038e-08
ATP5E	4322.6	-0.47453	-0.48199	7.18488e-09	9.44701e-08
FBLN7	403.1	-0.82303	-0.86813	7.35631e-09	9.66435e-08
WNK1	8701.8	0.5056	0.51466	7.6879e-09	1.00916e-07
CENPV	50	-1.58896	-2.03115	7.92746e-09	1.03974e-07
CARMN	347.3	-1.24826	-1.41523	8.18419e-09	1.07252e-07
RNF217	661.8	0.7719	0.80612	8.29404e-09	1.08601e-07
RP11-390E23.6	82.9	1.34829	1.57931	8.45175e-09	1.10574e-07
DLG1	2115.3	0.47964	0.48739	8.47819e-09	1.10828e-07
BUD13	397.9	-0.78077	-0.81677	8.61431e-09	1.12514e-07
SMCR8	1858.4	0.70435	0.7298	8.64186e-09	1.12781e-07
IL1B	30.8	1.7719	2.74368	9.01415e-09	1.17542e-07
SH3BP5	1346.1	-0.6168	-0.63391	9.16181e-09	1.19368e-07
USP39	1562.9	0.50758	0.51684	9.24861e-09	1.204e-07
FAM91A1	1361.5	-0.65803	-0.67915	9.38084e-09	1.22021e-07
MT1F	11.1	-1.87936	-4.79062	9.50138e-09	1.23487e-07
SLC31A2	511.3	0.86586	0.91663	9.64681e-09	1.25273e-07
MAFF	1292.5	0.68759	0.71185	9.73518e-09	1.26317e-07
DCAF1	1053.7	0.61037	0.62713	1.01705e-08	1.31787e-07
MICB	1206.5	0.8284	0.87212	1.01734e-08	1.31787e-07
RNF26	1478.1	-0.54248	-0.55404	1.02532e-08	1.32664e-07
GPSM2	247.1	-1.03741	-1.13206	1.0258e-08	1.32664e-07
PANX1	2376.9	0.88911	0.9442	1.02937e-08	1.33016e-07
POMGNT1	2575.1	-0.48765	-0.49609	1.03366e-08	1.33461e-07
OLFM1	59.3	-1.57224	-2.16456	1.04554e-08	1.34884e-07
AC009404.2	133.5	-1.21737	-1.38916	1.07006e-08	1.37935e-07
UCHL1	7912.5	0.52944	0.54012	1.07183e-08	1.3805e-07
S1PR2	830.5	0.73006	0.76049	1.08384e-08	1.39483e-07
IRF1	2201	1.49354	1.85244	1.10294e-08	1.41826e-07
SUMF2	5541.9	-0.44523	-0.45151	1.11418e-08	1.43154e-07
RNF207	88	-1.4279	-1.74483	1.14588e-08	1.47107e-07
PRR11	113	-1.22024	-1.35897	1.1521e-08	1.47786e-07
GNB1	16539.5	0.47685	0.48465	1.18764e-08	1.52221e-07
STIP1	3989.7	0.456	0.46274	1.20111e-08	1.53822e-07
DDR2	12954.1	0.59651	0.61203	1.22693e-08	1.57001e-07
C9orf3	1999.7	-0.67312	-0.69578	1.23289e-08	1.57636e-07
KIF22	242.8	-0.93283	-0.994	1.24538e-08	1.59104e-07
SEC23A	8893.4	-0.52138	-0.53169	1.2486e-08	1.59386e-07
CNPY4	756.5	-0.6015	-0.61746	1.26032e-08	1.60752e-07
NIPSNAP1	1188.2	-0.76277	-0.79692	1.26961e-08	1.61806e-07
RP11-479G22.8	116.5	1.21965	1.38878	1.28482e-08	1.63612e-07
LSM14A	3090.5	0.43837	0.44441	1.28641e-08	1.63682e-07
DOCK1	5652.1	-0.41134	-0.4164	1.34739e-08	1.71303e-07
NCAPG	130.4	-1.18488	-1.31794	1.34961e-08	1.71448e-07
BRCA1	117.6	-1.23942	-1.41008	1.36295e-08	1.73003e-07
CD27-AS1	380.9	-0.81451	-0.85721	1.3651e-08	1.73136e-07
RP11-399O19.9	94.4	1.32399	1.55778	1.39454e-08	1.76727e-07
GTF2H1	2866.2	0.54358	0.55535	1.397e-08	1.76897e-07
GMFB	1890.5	-0.7037	-0.73093	1.41109e-08	1.78538e-07
LSM2	474	-0.72434	-0.75345	1.4174e-08	1.79193e-07
HLA-C	10985.5	-0.49701	-0.506	1.438e-08	1.81651e-07
NR4A3	209	1.06841	1.18055	1.44254e-08	1.82079e-07
KIRREL	14328.8	0.53671	0.54803	1.44614e-08	1.82388e-07
PTPRS	1604.8	0.67274	0.69557	1.45291e-08	1.83095e-07
CRYAB	1880.5	0.48682	0.49521	1.45666e-08	1.83421e-07
KIF15	53.1	-1.51743	-1.87039	1.4622e-08	1.83972e-07
PMEPA1	1695.4	0.85209	0.90183	1.49733e-08	1.8824e-07
DIP2C	2751.5	0.49833	0.50739	1.51559e-08	1.90384e-07
TRIAP1	1541.7	0.64176	0.66186	1.55026e-08	1.94585e-07
KDELR2	12902.3	0.41038	0.4154	1.5712e-08	1.97057e-07
GNG12	11186.6	0.60966	0.62668	1.65447e-08	2.07335e-07
SLFN5	9655.9	0.8257	0.8702	1.67546e-08	2.09798e-07
HLA-L	752.9	-0.58668	-0.6025	1.68691e-08	2.11065e-07
NADSYN1	2111.8	0.473	0.48087	1.72867e-08	2.16118e-07
CORO1C	12855.7	0.58774	0.60295	1.74474e-08	2.17954e-07
AARS	6876.1	-0.63181	-0.65087	1.77494e-08	2.21552e-07
DEAF1	1048.6	0.58725	0.60237	1.78285e-08	2.22362e-07
TGFBR2	10823.2	-0.38345	-0.38758	1.80705e-08	2.25203e-07
SLBP	1265.8	0.63298	0.65185	1.84104e-08	2.29258e-07
RASD2	94.6	-1.32022	-1.53069	1.84317e-08	2.29342e-07
ARHGEF25	874.9	-0.63096	-0.6501	1.87988e-08	2.33725e-07
ACOX1	1311.8	-0.61233	-0.62984	1.94824e-08	2.41891e-07
MRGPRF	1180.2	-0.59091	-0.60638	1.94963e-08	2.41891e-07
GIT1	1537.3	0.54908	0.56153	1.95016e-08	2.41891e-07
TOMM20	4011.2	0.51238	0.52232	1.96659e-08	2.43736e-07
RAF1	3020.2	-0.43731	-0.4434	1.9682e-08	2.43744e-07
DCUN1D3	630.4	0.69837	0.72594	2.00199e-08	2.47735e-07
APCDD1L-AS1	192.2	1.04596	1.14274	2.04186e-08	2.5247e-07
CSDC2	822.5	-0.63322	-0.65312	2.07924e-08	2.56884e-07
ATP6V1G2	46.4	-1.59606	-2.23657	2.08082e-08	2.56884e-07
NOP14-AS1	563.9	-0.70327	-0.72971	2.10724e-08	2.59943e-07
FGF7	1963.2	0.55843	0.57129	2.11061e-08	2.60154e-07
SUN1	3134.3	0.49127	0.50018	2.11414e-08	2.60386e-07
SCCPDH	1292.2	-0.51821	-0.52861	2.13203e-08	2.62384e-07
TMED5	2337.2	0.6298	0.64849	2.15201e-08	2.64637e-07
SKA1	25.4	-1.78414	-2.78246	2.18098e-08	2.6799e-07
DCAF12	1826.3	-0.61761	-0.63596	2.201e-08	2.7024e-07
TTC39B	779.4	0.84863	0.89747	2.21143e-08	2.71309e-07
UNC93B1	508.5	0.84289	0.89198	2.22106e-08	2.72278e-07
RASEF	101.5	1.47323	1.88066	2.23004e-08	2.73167e-07
SBNO1	1620.4	0.58976	0.60527	2.27931e-08	2.78986e-07
UBTD1	1114.8	0.60492	0.62177	2.28947e-08	2.80012e-07
ZNFX1	11220.1	1.41047	1.71355	2.29668e-08	2.80676e-07
ACSL1	1786.2	0.54064	0.55257	2.31506e-08	2.82702e-07
RPE	1016.4	0.57596	0.59056	2.38482e-08	2.90777e-07
SLC35F6	2284.3	0.54646	0.55881	2.38487e-08	2.90777e-07
OAS2	2737.7	1.79246	2.85658	2.40008e-08	2.92349e-07
PAQR4	88	-1.369	-1.64285	2.40147e-08	2.92349e-07
AXIN1	1080.1	0.59628	0.61231	2.40583e-08	2.92653e-07
PYCR1	3627.3	-0.46304	-0.47048	2.47766e-08	3.01158e-07
MMP24-AS1	1680.2	-0.61564	-0.6337	2.48935e-08	3.02347e-07
TMEM35A	90.8	-1.51084	-2.03233	2.49587e-08	3.02905e-07
HSPH1	5150	0.44387	0.45038	2.5062e-08	3.03926e-07
KIAA0232	2006.3	0.49681	0.50592	2.5779e-08	3.1238e-07
POLQ	41.3	-1.6143	-2.09971	2.60003e-08	3.1482e-07
RP11-1069G10.1	41.9	-1.66732	-2.38538	2.603e-08	3.14937e-07
TGFBI	85220.4	-0.57333	-0.58778	2.6246e-08	3.17307e-07
MALT1	2085.5	0.66904	0.6927	2.64772e-08	3.19857e-07
TAF5L	882.6	-0.58246	-0.59807	2.67033e-08	3.2219e-07
MYPOP	163.1	-1.13412	-1.28116	2.67112e-08	3.2219e-07
POLE3	1410.4	-0.64962	-0.67102	2.68224e-08	3.23284e-07
BBS4	747.5	-0.61442	-0.63252	2.70289e-08	3.25524e-07
MED29	1386.4	-0.53965	-0.5516	2.71386e-08	3.26596e-07
TSPY26P	205.9	-1.01549	-1.10418	2.73256e-08	3.28595e-07
EVC2	854.6	0.62247	0.64117	2.78608e-08	3.34776e-07
XRN1	1502.9	0.94838	1.02192	2.809e-08	3.37272e-07
WDR62	60.8	-1.39353	-1.64344	2.82505e-08	3.38942e-07
CES2	2459.8	0.45985	0.46729	2.8281e-08	3.39049e-07
MBTPS2	1581.8	0.56685	0.58087	2.88612e-08	3.45743e-07
TRIM56	2285.1	0.62443	0.64341	2.89436e-08	3.46466e-07
EMILIN2	2314.4	-0.62818	-0.64772	2.93699e-08	3.51303e-07
SKA3	33.9	-1.65894	-2.22469	2.94368e-08	3.51836e-07
USP53	4470.5	0.6537	0.67563	2.96001e-08	3.5352e-07
HLA-A	17329.9	-0.4474	-0.4542	2.97467e-08	3.55002e-07
FAM35A	715.9	0.6841	0.70955	3.02113e-08	3.60273e-07
AEN	3071.9	0.47181	0.47989	3.06929e-08	3.6574e-07
NUDT5	1637.2	0.5146	0.52499	3.08583e-08	3.67433e-07
TXNRD1	15375.1	0.72466	0.75514	3.11522e-08	3.70652e-07
TMEM41A	627	-0.64068	-0.66174	3.12703e-08	3.71777e-07
FOXC1	445.4	-0.83278	-0.88086	3.13801e-08	3.72801e-07
ESYT1	6050	-0.43875	-0.44515	3.15406e-08	3.74426e-07
SEPT6	712.4	-0.60965	-0.62678	3.20465e-08	3.80146e-07
AGFG1	3494.1	0.61267	0.63069	3.26604e-08	3.87137e-07
PTEN	2309.1	0.54453	0.55712	3.30232e-08	3.91143e-07
LINC02035	182.6	1.02749	1.1216	3.31671e-08	3.92552e-07
PPP1R2	898.7	0.59391	0.61026	3.33554e-08	3.94485e-07
LSM1	1148.6	-0.54191	-0.55453	3.38813e-08	4.00404e-07
COMP	5093.7	-0.55979	-0.57339	3.43812e-08	4.06007e-07
CHRM2	1072.8	-0.56686	-0.58097	3.44716e-08	4.0677e-07
PELI1	264.2	1.01512	1.11071	3.46756e-08	4.08597e-07
SMUG1	641.3	-0.6386	-0.65929	3.47035e-08	4.08597e-07
SYNC	4093.2	0.68423	0.70979	3.47041e-08	4.08597e-07
LNX2	298.6	-0.87319	-0.92998	3.48919e-08	4.10501e-07
ANXA6	14281.8	-0.49826	-0.5078	3.51056e-08	4.12707e-07
LINC00094	1312.7	0.49546	0.50504	3.53659e-08	4.15457e-07
SATB1	405.2	0.84561	0.89903	3.56553e-08	4.18544e-07
MICAL1	2060.7	-0.60021	-0.61745	3.57027e-08	4.1879e-07
CPEB3	133.6	1.3281	1.58703	3.66046e-08	4.29049e-07
ABLIM3	2679.4	0.42945	0.43557	3.66889e-08	4.29718e-07
DCLRE1B	163	-0.97214	-1.04969	3.68456e-08	4.31234e-07
GPAM	629.5	-0.79565	-0.83641	3.69042e-08	4.31598e-07
NTNG2	193.1	-1.00172	-1.10522	3.7568e-08	4.39036e-07
TMEM161B	289.6	0.86097	0.9158	3.77094e-08	4.40362e-07
INO80D	513.4	0.86492	0.91912	3.78002e-08	4.41095e-07
FBXO33	679.6	0.64696	0.669	3.83322e-08	4.46973e-07
NUF2	39.3	-1.62955	-2.15154	3.85481e-08	4.4908e-07
USP40	1564.8	-0.58655	-0.60265	3.85699e-08	4.4908e-07
SDCBP	5728	0.46798	0.47593	3.86486e-08	4.49665e-07
DCLK1	541.8	0.69286	0.72119	3.87113e-08	4.50062e-07
FAM84A	202	-1.15235	-1.31047	3.88293e-08	4.51014e-07
FBXL17	562.4	0.75354	0.78895	3.88504e-08	4.51014e-07
TPRA1	1497.2	0.5084	0.51863	4.10449e-08	4.76138e-07
FKBP1B	61.2	-1.50501	-1.98364	4.17184e-08	4.83596e-07
SMG9	1103.3	-0.51586	-0.52678	4.40327e-08	5.09926e-07
PTDSS2	936.8	0.53001	0.54172	4.40545e-08	5.09926e-07
SERTAD4	40	-1.63777	-2.40324	4.43818e-08	5.13337e-07
CDKN3	58.7	-1.48449	-1.84009	4.45341e-08	5.14721e-07
VPS4A	1634.5	0.51457	0.52527	4.55542e-08	5.26126e-07
NPC2	3687.2	0.43238	0.43867	4.5744e-08	5.27931e-07
MSMO1	3508.7	0.56255	0.57674	4.62783e-08	5.33707e-07
TMEM80	360.5	-0.74804	-0.78317	4.6879e-08	5.40239e-07
CSF1	5173.7	0.53874	0.55124	4.71808e-08	5.4332e-07
QPCT	995.8	0.58147	0.59718	4.80574e-08	5.53011e-07
SLC9B2	935	0.59978	0.61689	4.83053e-08	5.55458e-07
CAPG	1094.9	-0.54196	-0.55454	4.87706e-08	5.60399e-07
NCKIPSD	528.5	-0.63538	-0.65647	4.94678e-08	5.67997e-07
ABI2	2015.8	0.5142	0.52489	5.00179e-08	5.73895e-07
TPM1	44814.4	-0.64033	-0.66164	5.07622e-08	5.82011e-07
IFNB1	64.1	1.80247	6.37427	5.0939e-08	5.83462e-07
RNF19B	769.3	0.9216	0.9944	5.09627e-08	5.83462e-07
HOXA11-AS	135.8	1.07007	1.17999	5.11228e-08	5.8487e-07
YWHAQ	7059.9	-0.39891	-0.40389	5.12492e-08	5.85891e-07
IPMK	186.8	0.96873	1.05191	5.15721e-08	5.89155e-07
AURKB	62.1	-1.438	-1.73506	5.24182e-08	5.98387e-07
POLR2A	6162.7	-0.40477	-0.40993	5.25313e-08	5.99244e-07
ABRACL	382.8	-0.71663	-0.74776	5.26203e-08	5.99826e-07
CPPED1	1461.5	0.53513	0.54736	5.28081e-08	6.01531e-07
URB2	525.4	-0.6765	-0.70121	5.29198e-08	6.02369e-07
TM9SF3	8904.6	0.48142	0.49029	5.38014e-08	6.11962e-07
PEX6	455.6	-0.72317	-0.75548	5.39771e-08	6.13518e-07
MAP1LC3B	4028.9	0.55354	0.5671	5.49943e-08	6.24629e-07
TERF2IP	2525.4	0.4584	0.46598	5.55355e-08	6.30322e-07
OCIAD1	2607.9	0.45166	0.45896	5.65928e-08	6.4186e-07
SPIN4	137.9	-1.08716	-1.21047	5.68377e-08	6.44174e-07
NDNF	202.1	-1.00608	-1.10638	5.82817e-08	6.60065e-07
EEF2	110934	0.41788	0.42363	5.88805e-08	6.66368e-07
TMEM141	376	-0.76259	-0.79985	5.90124e-08	6.67382e-07
SCAP	1889.1	-0.5027	-0.51311	5.90792e-08	6.67659e-07
ETHE1	1758.2	-0.51662	-0.52787	5.99647e-08	6.7718e-07
ALG8	727.7	-0.5617	-0.57633	6.22497e-08	7.02481e-07
ACKR4	206.2	1.0294	1.14715	6.26774e-08	7.06802e-07
ADAMTS19	82.6	1.37903	1.68365	6.38363e-08	7.19356e-07
GFPT2	1326	-0.58491	-0.60174	6.42555e-08	7.23375e-07
IFI16	6728.3	0.73614	0.76982	6.42847e-08	7.23375e-07
FBXL2	429.9	-0.74009	-0.77535	6.48338e-08	7.29034e-07
FAM46C	281.4	1.17954	1.3396	6.54357e-08	7.35277e-07
IREB2	2424.9	0.57771	0.59339	6.61835e-08	7.43131e-07
SMARCAL1	1147.7	-0.50069	-0.51081	6.62688e-08	7.43131e-07
PSAT1	8821.3	0.46136	0.46918	6.62761e-08	7.43131e-07
C22orf29	939.7	-0.72764	-0.75961	6.68551e-08	7.49091e-07
TP73-AS1	589.1	-0.68867	-0.71693	6.74683e-08	7.55424e-07
COL8A1	6492.1	-0.43047	-0.43688	7.07154e-08	7.9122e-07
ROR2	874.2	0.60298	0.62072	7.10002e-08	7.93843e-07
RAD51AP1	36.6	-1.6129	-2.27205	7.14854e-08	7.98701e-07
DNAJB14	904.6	0.66244	0.68657	7.18064e-08	8.0172e-07
FAM160B2	1322.9	-0.56655	-0.5815	7.1909e-08	8.02297e-07
CDC27	3439.1	0.61667	0.63624	7.21651e-08	8.04585e-07
GTPBP2	4193.8	0.50089	0.51096	7.28785e-08	8.11964e-07
CPNE2	769.8	-0.61306	-0.63244	7.3159e-08	8.14514e-07
NBR1	5399.9	-0.39849	-0.40356	7.46255e-08	8.30255e-07
RAB18	2995	0.50469	0.51515	7.49774e-08	8.33115e-07
PFKP	3197.5	-0.65024	-0.67352	7.49883e-08	8.33115e-07
ACER3	804.7	0.68721	0.71447	7.56944e-08	8.40368e-07
C18orf8	808.5	0.60778	0.62647	7.62703e-08	8.46166e-07
STRN3	955.9	0.58523	0.60171	7.89432e-08	8.75203e-07
FANCI	216.9	-0.90715	-0.97129	7.90602e-08	8.75885e-07
TPK1	60.7	-1.43564	-1.86787	7.99325e-08	8.84927e-07
CLTCL1	415.7	-0.75325	-0.78888	8.03869e-08	8.89332e-07
OMD	108.8	-1.23167	-1.44788	8.06919e-08	8.92081e-07
JMY	949.9	0.55684	0.57091	8.09935e-08	8.94788e-07
MTSS1L	4423.3	0.44166	0.44858	8.15444e-08	9.00244e-07
FBXW5	4027.6	0.45463	0.46231	8.3729e-08	9.23714e-07
CAMK1D	591.4	0.83391	0.88567	8.40687e-08	9.26814e-07
PAM	17366.7	0.45255	0.46011	8.47723e-08	9.33918e-07
FZD4	795.3	1.37245	1.68251	8.64248e-08	9.51457e-07
ISCU	3176.9	0.46063	0.46877	8.67207e-08	9.54049e-07
TMEM208	886	-0.56493	-0.5801	8.74171e-08	9.61039e-07
UHRF1	188.4	-1.01484	-1.11247	8.85073e-08	9.72347e-07
STK3	595.2	0.73544	0.76944	8.90125e-08	9.77216e-07
SCYL2	2532.8	0.53871	0.55172	8.94471e-08	9.80734e-07
ERMP1	880.8	0.54219	0.55469	8.94574e-08	9.80734e-07
TBC1D20	4441.2	0.51082	0.5218	8.96064e-08	9.81685e-07
LGALS8	2085.8	0.55864	0.57322	9.41727e-08	1.03099e-06
NAPA	2080.1	0.52553	0.53758	9.47657e-08	1.03677e-06
PQLC2	584.9	0.67902	0.70545	9.52257e-08	1.04108e-06
TRUB1	661.2	-0.71155	-0.74393	9.55672e-08	1.04409e-06
LDHB	10690	0.39447	0.39945	9.58269e-08	1.0462e-06
CSNK2A2	2100.1	0.5608	0.57558	9.87699e-08	1.07758e-06
TUSC2	653.2	-0.61586	-0.63564	9.88905e-08	1.07815e-06
CDK1	101.9	-1.41263	-1.72471	9.98632e-08	1.08801e-06
PTP4A1	6626.8	0.53253	0.54524	1.00488e-07	1.09406e-06
RAD51	83.4	-1.21643	-1.41191	1.00884e-07	1.09761e-06
SEPHS2	1988.1	-0.50922	-0.52012	1.01284e-07	1.1012e-06
LYSMD3	890.5	0.65004	0.67403	1.01815e-07	1.10621e-06
YPEL5	3036.7	0.50217	0.51266	1.03028e-07	1.11862e-06
MLLT3	838.3	0.72003	0.75228	1.03193e-07	1.11965e-06
FOXK2	2150.5	0.5049	0.51554	1.0349e-07	1.12209e-06
NFKBIZ	1231	1.39831	1.73816	1.03933e-07	1.12612e-06
GTF2E2	1504.1	0.55223	0.56647	1.04673e-07	1.1331e-06
RSU1	4542.7	-0.45316	-0.46084	1.04721e-07	1.1331e-06
NUAK1	1002.4	-0.59408	-0.61169	1.0631e-07	1.1495e-06
LMLN	287.8	-0.89903	-0.9661	1.09969e-07	1.18825e-06
DNAJC1	1683	0.52226	0.53421	1.10292e-07	1.19093e-06
F3	1217.1	-1.29681	-1.54801	1.10717e-07	1.19469e-06
KIAA1324L	213.9	0.97418	1.0591	1.11441e-07	1.20169e-06
FGFBP3	36.8	-1.62106	-2.40891	1.13043e-07	1.21784e-06
SLF2	882.8	0.61859	0.63886	1.13093e-07	1.21784e-06
C2CD2	1924.4	0.60915	0.62855	1.13791e-07	1.22452e-06
PHEX	128.6	1.15439	1.31059	1.14662e-07	1.23304e-06
CDC25C	17.6	-1.75012	-3.47874	1.16383e-07	1.2507e-06
MRPL16	911	-0.5311	-0.54368	1.17027e-07	1.25676e-06
UBE4A	2267.6	-0.57932	-0.59614	1.17125e-07	1.25696e-06
IDH3G	1249.9	0.46861	0.4771	1.17437e-07	1.25945e-06
SNN	659.9	0.66064	0.6854	1.18024e-07	1.26488e-06
SPPL3	1418	0.51259	0.52392	1.1851e-07	1.26924e-06
MTIF2	861.7	-0.58409	-0.60122	1.20571e-07	1.29043e-06
CCAR1	2243.7	0.47705	0.48608	1.20857e-07	1.29261e-06
TMSB10	34333.8	-0.39638	-0.40154	1.23531e-07	1.32032e-06
QKI	5212.5	0.54529	0.55909	1.25037e-07	1.33551e-06
ZNF93	95.9	-1.21063	-1.39757	1.26825e-07	1.35368e-06
AFDN	1130.6	0.5466	0.56059	1.2709e-07	1.35559e-06
NPAS2	1943.2	0.56808	0.5836	1.27812e-07	1.36238e-06
ATF1	489.2	0.70254	0.73074	1.28263e-07	1.36626e-06
SERBP1	5227.9	0.44877	0.45634	1.30413e-07	1.38822e-06
HSPA4	7950.3	0.42663	0.43311	1.30533e-07	1.38857e-06
RPSAP52	562.1	0.95002	1.03288	1.31772e-07	1.4008e-06
SLC25A33	232.7	0.88438	0.94896	1.32744e-07	1.41018e-06
PLA2G15	1740.8	0.47387	0.483	1.34315e-07	1.42591e-06
UBE2K	2401.3	0.4823	0.49167	1.3511e-07	1.43338e-06
SPHK1	7817.5	0.75296	0.79125	1.35541e-07	1.43699e-06
SLC12A4	5016.6	0.41467	0.42067	1.35775e-07	1.4385e-06
WDR76	75.3	-1.40312	-1.74963	1.36085e-07	1.44081e-06
WASHC2C	575.9	0.61723	0.63773	1.37526e-07	1.4551e-06
MOXD1	14051.5	0.40582	0.41143	1.38879e-07	1.46843e-06
BRI3BP	113.9	-1.17419	-1.34048	1.39181e-07	1.47063e-06
WDR47	812.1	0.56365	0.57905	1.40008e-07	1.47838e-06
RP11-983P16.4	97.1	-1.12174	-1.26201	1.40983e-07	1.48768e-06
ESF1	819.2	0.5799	0.59659	1.41574e-07	1.49292e-06
EBF4	166.3	-0.98891	-1.09673	1.41885e-07	1.4952e-06
NUDT1	172.5	-1.00461	-1.10698	1.46034e-07	1.5379e-06
KAZALD1	1604.6	-0.61837	-0.63881	1.46306e-07	1.53973e-06
DIAPH2	534.1	0.69177	0.72089	1.48267e-07	1.55933e-06
GPC1	15259.5	0.41445	0.42049	1.50863e-07	1.58557e-06
SRSF5	2464.9	-0.47782	-0.48715	1.51737e-07	1.59369e-06
MBNL3	261.7	0.83861	0.89229	1.5229e-07	1.59843e-06
PANK3	2383.9	0.57358	0.58979	1.54012e-07	1.61544e-06
THSD1	170.6	1.19152	1.39475	1.57801e-07	1.65407e-06
ZDHHC21	452.4	0.71344	0.74698	1.61877e-07	1.69568e-06
DEPDC1	42.9	-1.50001	-1.88033	1.66821e-07	1.7463e-06
CLEC3B	515.6	-0.81247	-0.86313	1.69149e-07	1.7695e-06
SIAH2	1363.2	-0.72122	-0.75561	1.71609e-07	1.79405e-06
DNM1	1269.1	0.56431	0.58014	1.71817e-07	1.79503e-06
SLC1A4	2163.3	-0.55282	-0.56751	1.72207e-07	1.7979e-06
ALMS1	927.8	-0.62399	-0.64538	1.73122e-07	1.80626e-06
PURA	1205.7	0.67712	0.70505	1.74033e-07	1.81457e-06
PRPF4B	2325.5	0.61546	0.63615	1.74813e-07	1.8215e-06
RRAD	56.1	1.39747	1.83538	1.76119e-07	1.8339e-06
EIF2AK4	4392.3	0.38776	0.39271	1.76526e-07	1.83692e-06
EIF2S3	3363.8	0.512	0.52357	1.81423e-07	1.88664e-06
INPP5K	809.8	-0.54754	-0.5622	1.81799e-07	1.8893e-06
FOXL2NB	324.7	-0.78273	-0.82883	1.82199e-07	1.8922e-06
TRIM47	266.8	-1.07172	-1.20584	1.83477e-07	1.90423e-06
NCKAP5	470.1	0.80534	0.85588	1.84184e-07	1.9103e-06
SESTD1	785.3	-0.58976	-0.60801	1.84685e-07	1.91424e-06
NCOA7	2188.9	0.82506	0.87812	1.85051e-07	1.91677e-06
ZNF720	448.6	0.71248	0.74565	1.85548e-07	1.92066e-06
BCAP31	3029.1	0.42469	0.43124	1.88709e-07	1.9521e-06
POM121	808.1	0.60585	0.62557	1.88915e-07	1.95288e-06
RAPGEF1	3384.1	0.45372	0.46181	1.89033e-07	1.95288e-06
CYTH2	1265.4	0.50773	0.5191	1.90098e-07	1.96261e-06
PLOD3	8400.2	0.39223	0.39739	1.90741e-07	1.96796e-06
PCSK9	1208.4	0.53182	0.54455	1.91042e-07	1.96977e-06
CRYZ	643.7	-0.62386	-0.64541	1.91804e-07	1.97633e-06
ARHGAP23	6607.3	0.42119	0.42761	1.9211e-07	1.97819e-06
PCDHGB5	651.6	0.62336	0.64431	1.93978e-07	1.99613e-06
SERPINE1	102335	0.50067	0.51158	1.95173e-07	2.00711e-06
NAMPTP1	165	1.18087	1.3611	1.95342e-07	2.00754e-06
WDFY3	2662.1	0.53511	0.54851	1.9757e-07	2.02911e-06
CYCS	1225.9	0.56681	0.58279	1.97968e-07	2.03188e-06
UBE2G1	1372.5	0.46481	0.47348	1.99796e-07	2.04812e-06
VPS35	4410.9	0.41627	0.42246	1.9981e-07	2.04812e-06
SLC6A6	3552.4	0.4734	0.48265	2.00651e-07	2.0554e-06
PDLIM4	1478.2	-0.66777	-0.69464	2.01983e-07	2.06771e-06
SMIM14	1834.8	0.57922	0.59625	2.03799e-07	2.08494e-06
BTN3A2	1144.3	-0.57952	-0.59721	2.08175e-07	2.12833e-06
PNPLA6	2091.3	-0.48035	-0.49013	2.08482e-07	2.13009e-06
CCDC85C	180.4	-0.96344	-1.05154	2.08987e-07	2.13386e-06
CCNE2	21.3	-1.70303	-2.88334	2.09219e-07	2.13485e-06
RCC2	2815.2	0.60069	0.61998	2.10385e-07	2.14536e-06
PANK1	268.9	0.84258	0.90179	2.11764e-07	2.15802e-06
BLOC1S6	2275.3	0.55901	0.57467	2.12851e-07	2.1677e-06
PELO	1763.4	0.6326	0.65553	2.13465e-07	2.17254e-06
NAGK	1847.4	-0.52907	-0.54236	2.15654e-07	2.19341e-06
KRT19	854.2	-0.80621	-0.85846	2.20987e-07	2.24595e-06
REEP2	183.8	-0.98399	-1.0843	2.21105e-07	2.24595e-06
STAT6	9206.4	0.40598	0.41178	2.21839e-07	2.25195e-06
ZW10	692.5	-0.67025	-0.69811	2.22076e-07	2.25291e-06
ZNF143	484.2	0.69966	0.73086	2.28264e-07	2.3142e-06
EIF4B	6014	0.46807	0.47703	2.29204e-07	2.32224e-06
KLF13	4613.7	-0.38471	-0.38972	2.30962e-07	2.33855e-06
SERPINB2	2721.3	1.34219	1.67148	2.314e-07	2.34147e-06
SLC25A28	1471.3	0.83193	0.88798	2.33323e-07	2.35942e-06
MRPS7	1418.5	-0.50937	-0.521	2.34471e-07	2.36951e-06
UBE2T	96.9	-1.16646	-1.34286	2.37595e-07	2.39955e-06
CDK16	3359.9	-0.43998	-0.4475	2.3867e-07	2.40886e-06
CEP170	2159.4	0.66172	0.68839	2.39536e-07	2.41605e-06
CDK14	2884.3	0.42542	0.43216	2.40352e-07	2.42273e-06
ZNF107	217.6	1.00293	1.11406	2.44145e-07	2.45939e-06
CCNY	3921.9	0.41812	0.42451	2.44358e-07	2.45996e-06
SPDL1	3539.4	-0.55374	-0.56906	2.50465e-07	2.51984e-06
RAB7A	12667	0.50367	0.51502	2.53314e-07	2.54687e-06
CNTNAP1	6600.1	0.39984	0.40541	2.53488e-07	2.547e-06
ORAI2	3115.5	0.4494	0.45745	2.58692e-07	2.59608e-06
ATP6V1F	2288.4	0.4382	0.44559	2.58702e-07	2.59608e-06
ISG15	4451.6	1.60547	2.38826	2.59192e-07	2.59934e-06
ZNF48	243.2	-0.83142	-0.8862	2.59388e-07	2.59965e-06
PTK2	3604.2	0.59888	0.61848	2.59704e-07	2.60116e-06
WDR6	3127.3	-0.48994	-0.50045	2.62292e-07	2.62542e-06
LDLRAD3	368.2	-0.76375	-0.80787	2.65174e-07	2.65258e-06
EIF3A	11560.9	0.53338	0.54694	2.66174e-07	2.66089e-06
FAM214A	831.8	0.55954	0.5755	2.69466e-07	2.6921e-06
SNX4	1149.7	0.59776	0.61696	2.70041e-07	2.69614e-06
HBEGF	353.3	0.83986	0.89706	2.70494e-07	2.69895e-06
KCNK15	299.5	0.8136	0.86311	2.73792e-07	2.73013e-06
SLC29A1	317.2	-0.78486	-0.83047	2.76696e-07	2.75734e-06
GYS1	1694.8	-0.44132	-0.44878	2.78603e-07	2.77459e-06
PAPD4	1723.8	0.57435	0.59158	2.80124e-07	2.78798e-06
CCDC115	504.8	-0.61305	-0.63427	2.81608e-07	2.80098e-06
RBM47	74.5	1.33979	1.62019	2.8218e-07	2.8049e-06
UEVLD	926.4	0.55774	0.57349	2.83855e-07	2.81977e-06
GLS	6128.2	0.68756	0.71796	2.85689e-07	2.83621e-06
SNX14	1617.9	0.53883	0.55286	2.86073e-07	2.83823e-06
RTF1	2623.4	0.51986	0.53252	2.90912e-07	2.88442e-06
ANAPC11	1191.9	-0.52091	-0.53377	2.95066e-07	2.92373e-06
CHMP6	787.1	-0.53614	-0.55022	2.95247e-07	2.92373e-06
POLR2G	1297	-0.46326	-0.47209	2.98365e-07	2.95275e-06
IDH2	1792	-0.52202	-0.53481	2.98943e-07	2.95661e-06
NHSL2	215.5	-0.9246	-1.01408	2.99491e-07	2.96017e-06
SSU72	2330.3	0.45744	0.46617	3.01413e-07	2.97731e-06
MAP2	977.1	0.72119	0.75668	3.02941e-07	2.99052e-06
CLDN1	92.7	1.25318	1.52329	3.08089e-07	3.03872e-06
KLF15	56.7	1.42013	1.81445	3.08209e-07	3.03872e-06
LRP11	1357.9	-0.58816	-0.60742	3.12213e-07	3.07627e-06
STAG2	3031.6	0.54114	0.55556	3.12502e-07	3.0772e-06
CNNM4	401.3	-0.72472	-0.76209	3.15816e-07	3.10789e-06
PCDH10	2089.2	-0.72828	-0.76543	3.16805e-07	3.11568e-06
TADA2B	1203.6	0.571	0.58799	3.17297e-07	3.11857e-06
CLIC3	65	-1.26046	-1.49956	3.18256e-07	3.12605e-06
USP36	2036.8	0.54536	0.56013	3.18957e-07	3.13098e-06
NR5A2	18.7	-1.67428	-3.09106	3.20501e-07	3.14418e-06
EGFR	9379.5	0.48803	0.49858	3.22302e-07	3.15988e-06
SH2B1	769.4	-0.58702	-0.6059	3.25883e-07	3.193e-06
BCS1L	353.3	-0.78818	-0.83546	3.27914e-07	3.21091e-06
ZNF219	2147.5	0.57615	0.59406	3.2893e-07	3.21886e-06
MYO15B	38.8	-1.57211	-2.56228	3.36534e-07	3.29123e-06
DDHD1	1447	0.53863	0.55285	3.37398e-07	3.29763e-06
PLCE1	221	-0.87773	-0.94885	3.37978e-07	3.30126e-06
ZCCHC24	3236.4	-0.40259	-0.40831	3.3857e-07	3.30499e-06
PTGS2	1519.9	1.60348	2.44912	3.396e-07	3.31299e-06
FKBP5	389	-0.7933	-0.84186	3.43607e-07	3.34848e-06
ARFGEF2	3122.4	0.47774	0.48764	3.43663e-07	3.34848e-06
SDCCAG8	823.1	0.54684	0.56189	3.44822e-07	3.3577e-06
ZBTB18	171.5	-0.97247	-1.07168	3.46509e-07	3.37205e-06
C3orf70	132.3	-0.98369	-1.08712	3.47022e-07	3.37496e-06
ILF3-AS1	159.2	-1.05154	-1.17692	3.50012e-07	3.4014e-06
CCDC8	667.8	-0.71681	-0.75164	3.50173e-07	3.4014e-06
C11orf68	2136.4	-0.57383	-0.59148	3.51268e-07	3.40994e-06
TTC17	2474.7	0.49021	0.50089	3.51497e-07	3.41006e-06
MIEF1	1863.4	-0.58377	-0.60223	3.53602e-07	3.42838e-06
TSPYL2	873.8	-0.61122	-0.63272	3.57975e-07	3.46864e-06
GLIS2	3037.1	-0.47657	-0.48661	3.62312e-07	3.50851e-06
SHOX2	748.7	0.66622	0.69516	3.65006e-07	3.53242e-06
DUSP7	1642.7	-0.62071	-0.64323	3.69239e-07	3.5712e-06
ADIRF	451.4	-0.97881	-1.07967	3.76334e-07	3.63759e-06
MXD1	803.2	0.93289	1.01781	3.7744e-07	3.64604e-06
STRIP2	68.3	1.42552	1.81301	3.77979e-07	3.64901e-06
AP1AR	578.4	0.70647	0.74022	3.80102e-07	3.66727e-06
CREBRF	702	0.79016	0.84011	3.81146e-07	3.67509e-06
LYPD6	270.6	-1.13777	-1.31482	3.81443e-07	3.6757e-06
FERMT2	16967.9	0.6193	0.64164	3.86887e-07	3.72588e-06
FBLN2	36377.7	-0.4572	-0.46592	3.90756e-07	3.76085e-06
RNF11	3495.9	0.44811	0.45623	3.91813e-07	3.76872e-06
ARPIN	705.5	-0.66213	-0.69006	3.93108e-07	3.77887e-06
SPPL2A	2101.7	-0.54434	-0.55952	3.96671e-07	3.8108e-06
NDC80	82.1	-1.18138	-1.35512	3.97305e-07	3.81456e-06
DMXL1	1373	0.52494	0.53815	3.97593e-07	3.815e-06
TM9SF4	3950.2	0.3638	0.36816	4.00731e-07	3.84278e-06
SCFD1	2422	-0.49764	-0.509	4.0142e-07	3.84705e-06
REC8	88.7	1.20139	1.40684	4.03825e-07	3.86774e-06
GRAMD1A	1284.5	0.51531	0.52786	4.07844e-07	3.90386e-06
TDRP	144.3	0.94945	1.04401	4.1907e-07	4.00889e-06
RAB8A	1564.7	-0.46389	-0.47311	4.23469e-07	4.04851e-06
C9orf142	466.7	-0.6301	-0.65396	4.25209e-07	4.06268e-06
FOXF1	537.3	0.85581	0.92168	4.28225e-07	4.08902e-06
C1orf109	455.5	0.66584	0.69454	4.33296e-07	4.13494e-06
HN1L	1486.1	-0.52587	-0.53935	4.353e-07	4.15155e-06
MED1	2382.4	0.46426	0.47344	4.36369e-07	4.15923e-06
NEURL1B	67.1	-1.41529	-1.88264	4.41448e-07	4.20509e-06
SLC36A1	2743.6	0.51734	0.53031	4.41902e-07	4.20688e-06
C1orf74	102.9	-1.08669	-1.23374	4.45257e-07	4.23625e-06
C15orf39	839.3	-0.55205	-0.56783	4.53361e-07	4.31076e-06
DEXI	858.3	0.55592	0.57214	4.56973e-07	4.34249e-06
SLC16A5	300	-0.82291	-0.87862	4.64362e-07	4.41004e-06
DEPDC1B	30.8	-1.55262	-2.21296	4.66724e-07	4.4298e-06
THY1	32260.9	-0.32842	-0.33164	4.83185e-07	4.58328e-06
LAMA3	1250.4	0.57979	0.59836	4.93889e-07	4.682e-06
ELL2	7294	0.43666	0.44432	4.95269e-07	4.69226e-06
FAM135A	526.2	0.69224	0.72473	4.99698e-07	4.73137e-06
SCRG1	56.6	1.38913	1.77783	5.07873e-07	4.8059e-06
EBF3	266.5	-0.91335	-1.0098	5.10065e-07	4.82374e-06
CCNA2	281.2	-0.71998	-0.75287	5.16504e-07	4.88171e-06
AMPH	277.9	-0.81293	-0.86841	5.17925e-07	4.89221e-06
SNX25	901.9	0.61927	0.64229	5.25402e-07	4.95986e-06
ZNF436	551.7	-0.65703	-0.68434	5.29869e-07	4.99645e-06
RAB1A	7802	0.47049	0.48027	5.29912e-07	4.99645e-06
PSMD7	3121.3	0.45633	0.46523	5.36797e-07	5.05834e-06
HINT1	3457.4	-0.40104	-0.40697	5.38496e-07	5.07132e-06
NBEAL2	118.4	-1.13411	-1.31862	5.39314e-07	5.07576e-06
SEC14L2	306.1	-0.77232	-0.82028	5.39819e-07	5.07576e-06
RP11-196G18.22	81.3	1.21774	1.44146	5.39933e-07	5.07576e-06
DYM	1842.3	0.50079	0.51264	5.46224e-07	5.13184e-06
PPP3R1	1679.7	0.56277	0.57987	5.49006e-07	5.1549e-06
TSPAN5	3910.9	0.46086	0.47005	5.53065e-07	5.18992e-06
PLK4	58.7	-1.27854	-1.52347	5.56141e-07	5.21568e-06
STXBP6	537.2	0.92151	1.0094	5.56676e-07	5.2176e-06
EMILIN1	9640.8	-0.41262	-0.41915	5.65736e-07	5.29916e-06
VAPA	3795.6	0.42496	0.43211	5.6605e-07	5.29916e-06
ACSS1	217.1	-0.90364	-0.98415	5.69454e-07	5.32786e-06
SHROOM2	41.6	-1.48908	-2.15666	5.70903e-07	5.33825e-06
GIGYF2	2438.5	0.46484	0.4743	5.71792e-07	5.34339e-06
STS	1447.3	0.53596	0.55078	5.73299e-07	5.3543e-06
MX1	5838.3	1.65329	3.26734	5.75621e-07	5.3728e-06
ZFP91	3545.8	0.45552	0.46444	5.87964e-07	5.48477e-06
CLEC2B	244.3	0.85024	0.91811	5.88737e-07	5.48873e-06
MANBA	1565.9	0.48242	0.49304	5.90289e-07	5.49995e-06
HMGCS1	2995.2	0.72817	0.76677	5.93071e-07	5.52261e-06
STMN3	188.3	-1.04562	-1.22049	5.94151e-07	5.52939e-06
UBE2H	4910.1	0.39366	0.39934	5.95768e-07	5.54117e-06
ABI3BP	4490.9	-0.38294	-0.38825	5.99559e-07	5.57314e-06
RPS6KA3	3418.5	0.43758	0.44544	6.04104e-07	5.61208e-06
LAPTM4B	1843.8	0.51058	0.52331	6.07175e-07	5.63729e-06
POMGNT2	553.1	-0.59672	-0.61853	6.08254e-07	5.64398e-06
UBE2W	383.3	0.72052	0.75728	6.11069e-07	5.66676e-06
ATP5G1	965.3	-0.51097	-0.52359	6.15027e-07	5.70012e-06
ARHGAP31	2495.8	-0.57888	-0.5977	6.17646e-07	5.72102e-06
GINS2	32.5	-1.51102	-2.07322	6.21765e-07	5.7558e-06
CUTC	327.5	-0.75821	-0.80239	6.234e-07	5.76755e-06
SLC39A10	1451.3	0.51257	0.52542	6.26553e-07	5.79332e-06
SWI5	482.7	-0.70426	-0.73958	6.27022e-07	5.79426e-06
SIDT2	1854.4	-0.45854	-0.46782	6.32713e-07	5.84342e-06
MOB1B	1135.2	0.62244	0.64619	6.42158e-07	5.92718e-06
THUMPD1	997.2	0.62069	0.64458	6.52338e-07	6.01762e-06
KNOP1	507.7	-0.61228	-0.63516	6.58934e-07	6.07139e-06
NAV2	5074.2	0.6454	0.67211	6.59095e-07	6.07139e-06
INAFM2	933.7	0.52533	0.5393	6.59322e-07	6.07139e-06
SLC26A2	875.7	-0.74998	-0.7923	6.62178e-07	6.09412e-06
MCFD2	13364.5	0.48731	0.49843	6.67004e-07	6.13496e-06
B4GALT1	13437.7	-0.49482	-0.50646	6.73916e-07	6.19492e-06
SPC25	13.7	-1.6467	-3.01299	6.83032e-07	6.27506e-06
LRP10	17455.2	0.35266	0.35678	6.86751e-07	6.30555e-06
FAM98B	950.5	0.53348	0.54814	6.90559e-07	6.33682e-06
FOXO3	1723.4	0.60576	0.628	7.00244e-07	6.42196e-06
SCD5	694.9	0.54337	0.55917	7.10198e-07	6.50821e-06
EMC3	1571.1	-0.51901	-0.53268	7.10475e-07	6.50821e-06
GDPD5	515.2	0.64056	0.66687	7.22789e-07	6.61717e-06
THAP12	551.9	-0.6168	-0.64022	7.2383e-07	6.61972e-06
GIGYF1	1759.6	0.49313	0.50463	7.23981e-07	6.61972e-06
PDS5A	4047.8	0.47907	0.48964	7.24327e-07	6.61972e-06
GAB2	551.9	-0.63806	-0.66434	7.26348e-07	6.63434e-06
RP11-134L10.1	119.4	1.41662	1.90101	7.29516e-07	6.65942e-06
SLC38A6	444.2	0.62588	0.6509	7.3025e-07	6.66147e-06
KLHL2	565	0.6233	0.6476	7.30585e-07	6.66147e-06
MAGEF1	866.3	-0.55989	-0.57691	7.36502e-07	6.71154e-06
CPS1	234.9	-0.8843	-0.95658	7.39735e-07	6.7371e-06
TMEM94	992	-0.64846	-0.6763	7.42077e-07	6.75453e-06
MORF4L1	4977	0.37121	0.37608	7.4807e-07	6.80515e-06
DANCR	354.2	-0.70498	-0.74147	7.54822e-07	6.86261e-06
WDR63	272.9	0.86316	0.94176	7.69132e-07	6.98868e-06
BICD2	2191.9	0.44268	0.45103	7.73594e-07	7.02518e-06
TENM4	1221	-0.67657	-0.70868	7.78953e-07	7.06977e-06
PARP1	2125.7	-0.48225	-0.49293	7.84822e-07	7.11717e-06
AKR1B10	71.6	1.21083	1.47202	7.85078e-07	7.11717e-06
UACA	4883.9	-0.50933	-0.52227	7.87486e-07	7.1349e-06
ATP13A2	1740.9	-0.46539	-0.47519	7.8834e-07	7.13853e-06
PAN3	1039	0.54766	0.56365	7.97827e-07	7.22029e-06
WWC2	3251.1	0.51561	0.52898	7.99843e-07	7.23438e-06
STK11	1964.5	0.48158	0.4924	8.02248e-07	7.25197e-06
CREG1	1583.6	0.66159	0.69075	8.26602e-07	7.46784e-06
GHITM	6366.5	0.46799	0.47792	8.30728e-07	7.50081e-06
TP53INP1	1457.3	0.54622	0.56244	8.44764e-07	7.62318e-06
IRAK1	6384.4	0.47815	0.4888	8.54359e-07	7.70536e-06
BICC1	3347.2	-0.50697	-0.51988	8.56428e-07	7.71961e-06
SPON2	8548.9	0.65362	0.68184	8.6254e-07	7.77025e-06
ZDHHC4	1064.6	-0.47139	-0.48177	8.66206e-07	7.79882e-06
GCAT	266.2	-0.74543	-0.78782	8.76732e-07	7.88909e-06
ZNF772	299.3	-0.8001	-0.85508	8.83166e-07	7.94245e-06
ATAT1	188.1	-0.86938	-0.94299	8.9095e-07	8.00788e-06
ZBTB41	594.1	0.66037	0.69064	8.93179e-07	8.02334e-06
SLC2A13	475.3	0.7066	0.74345	8.96892e-07	8.04793e-06
MRNIP	219.6	-0.94359	-1.0403	8.96937e-07	8.04793e-06
RP11-488L18.4	224.3	0.78333	0.83478	8.9958e-07	8.06705e-06
SYAP1	1423	-0.55285	-0.56984	9.00879e-07	8.07411e-06
TMEM126B	847.5	0.56445	0.5824	9.0143e-07	8.07445e-06
CENPM	26.1	-1.56117	-2.32866	9.06364e-07	8.11404e-06
NSMF	2157.9	0.46013	0.46967	9.08142e-07	8.12535e-06
ADAMTSL5	541.9	-0.61625	-0.64128	9.17545e-07	8.20482e-06
DSN1	205.6	-0.83337	-0.89717	9.19423e-07	8.21695e-06
TAF6	1962.8	-0.45497	-0.46418	9.20609e-07	8.22289e-06
CIB1	1851.9	-0.46154	-0.47134	9.23357e-07	8.24276e-06
SSTR1	1494.5	-1.12261	-1.30602	9.26227e-07	8.2637e-06
FIBIN	1935.2	1.21513	1.44613	9.28057e-07	8.27535e-06
TBX4	87.6	-1.16134	-1.37592	9.31909e-07	8.305e-06
GABARAPL1	5472.6	-0.64601	-0.67302	9.3674e-07	8.342e-06
ZWINT	162.7	-0.98253	-1.08921	9.37119e-07	8.342e-06
MAPRE3	506.9	0.64725	0.67609	9.39165e-07	8.35549e-06
ACAP2	2362.8	0.51194	0.52514	9.46793e-07	8.41861e-06
TBC1D8	288.4	0.83226	0.89488	9.74217e-07	8.65331e-06
RBBP6	1609.7	0.71731	0.75597	9.74287e-07	8.65331e-06
ZDHHC2	1714.7	0.47564	0.48628	9.75915e-07	8.6629e-06
ZFP69	106.4	-1.05157	-1.19971	9.83494e-07	8.72526e-06
AGPAT5	455.6	-0.592	-0.61361	9.87206e-07	8.75326e-06
MEIS1	2361.4	-0.48788	-0.49941	9.93862e-07	8.80311e-06
VAMP4	934.9	0.61547	0.64034	9.93945e-07	8.80311e-06
PARP10	816.1	0.67247	0.70447	1.00477e-06	8.89401e-06
MYO1C	13940.6	-0.46806	-0.4782	1.02162e-06	9.03806e-06
BTBD3	773.4	-0.56258	-0.57952	1.02474e-06	9.06056e-06
ZCCHC2	678.6	0.79396	0.8489	1.04588e-06	9.24232e-06
SLC22A17	452.1	-0.69938	-0.73749	1.05381e-06	9.30721e-06
KIAA1644	2453.4	0.48389	0.49521	1.05567e-06	9.3184e-06
TOM1L1	423.1	0.62781	0.65288	1.05953e-06	9.3437e-06
DYNC1H1	19758.2	0.56667	0.58506	1.05972e-06	9.3437e-06
ZNF22	745	-0.55253	-0.56954	1.07808e-06	9.49778e-06
PDZD11	1313.2	-0.45207	-0.46125	1.0784e-06	9.49778e-06
TSPAN11	501.7	0.63375	0.66213	1.09667e-06	9.6487e-06
DHCR24	7868.1	0.36151	0.36611	1.09676e-06	9.6487e-06
CHEK1	353.5	-0.73509	-0.77559	1.09821e-06	9.65601e-06
APEX2	669.7	-0.56902	-0.58807	1.09899e-06	9.65753e-06
KIAA1456	223.7	-0.92736	-1.0214	1.1082e-06	9.73302e-06
IGFBP2	1501.1	-0.53751	-0.55341	1.11128e-06	9.75466e-06
MOCS1	481	-0.61861	-0.64329	1.11244e-06	9.75563e-06
EMX2	609.5	0.64656	0.6744	1.11263e-06	9.75563e-06
PPP3CC	997	0.77365	0.82409	1.11432e-06	9.76497e-06
ZMYM5	388.1	0.66613	0.69625	1.11612e-06	9.77534e-06
AGT	37.7	1.45381	1.93009	1.12127e-06	9.81505e-06
IL17RC	896.8	-0.55731	-0.57491	1.13286e-06	9.91098e-06
CRELD2	1312.4	-0.51868	-0.53262	1.13826e-06	9.94966e-06
NSF	1943.1	-0.40963	-0.41653	1.13855e-06	9.94966e-06
PRCP	4678.6	-0.38764	-0.3934	1.14249e-06	9.9786e-06
FNIP1	1668.9	0.53547	0.55102	1.14688e-06	1.00114e-05
TRANK1	2158.6	0.75327	0.79966	1.1603e-06	1.0123e-05
TKFC	552.3	-0.63387	-0.66067	1.17674e-06	1.02607e-05
FGF2	19955.5	1.1606	1.36827	1.1837e-06	1.03157e-05
KLHL38	25.7	1.56106	2.50948	1.18995e-06	1.03644e-05
COPB2	11357.7	-0.39614	-0.4023	1.19255e-06	1.03813e-05
HARS2	799.5	-0.49507	-0.50714	1.20875e-06	1.05165e-05
MAST4	1173.3	0.53687	0.55275	1.21242e-06	1.05426e-05
MEGF9	1158.5	0.84919	0.91835	1.23841e-06	1.07627e-05
BAX	3456.2	0.44084	0.44946	1.24096e-06	1.0779e-05
CDH3	35.8	-1.52177	-2.31919	1.26362e-06	1.09697e-05
PDPK1	1246.3	0.447	0.45591	1.26986e-06	1.10178e-05
VASN	12903.9	0.45168	0.46093	1.28102e-06	1.11085e-05
C1orf35	188.6	-0.83744	-0.9049	1.28729e-06	1.1153e-05
LRFN4	952.3	-0.61359	-0.63755	1.28756e-06	1.1153e-05
HTT	3093.7	0.43543	0.44368	1.29955e-06	1.12506e-05
BZW1	4403.9	0.43151	0.43952	1.31063e-06	1.13403e-05
SORBS3	2369.2	-0.44525	-0.45412	1.31685e-06	1.13879e-05
SLC25A13	718.1	0.57008	0.58886	1.32068e-06	1.14148e-05
SLC36A4	496.7	0.61053	0.635	1.32217e-06	1.14214e-05
CCNYL1	864.2	0.63071	0.65647	1.32808e-06	1.14662e-05
RECQL4	96.4	-1.05553	-1.19513	1.33433e-06	1.15138e-05
POLE2	35.5	-1.4746	-2.16284	1.3363e-06	1.15245e-05
RAB11FIP5	3873.3	0.43139	0.43944	1.3407e-06	1.15533e-05
RRAS2	2180	0.42627	0.4341	1.34111e-06	1.15533e-05
LRRC17	253.5	0.75147	0.79914	1.34386e-06	1.15707e-05
YIPF4	1314.5	0.49718	0.50969	1.34824e-06	1.16021e-05
ST3GAL1	3518.4	-0.45444	-0.46392	1.36065e-06	1.17025e-05
ZNF789	104.2	-1.06308	-1.21675	1.36581e-06	1.17404e-05
SCN9A	1467.8	0.62996	0.65625	1.39088e-06	1.19494e-05
TAB1	822.2	-0.54912	-0.56629	1.39692e-06	1.19948e-05
PDPR	1716.2	-0.39967	-0.40611	1.40797e-06	1.20831e-05
YWHAH	4534.5	-0.41312	-0.42025	1.41837e-06	1.21658e-05
ZFYVE26	2902.5	0.67883	0.71238	1.42612e-06	1.22255e-05
CTSS	195.1	1.03093	1.17168	1.43562e-06	1.23003e-05
ALDH7A1	1085.7	-0.46029	-0.47006	1.44066e-06	1.23368e-05
PLEC	28879.7	-0.54328	-0.5599	1.46063e-06	1.2501e-05
MED9	333.7	-0.69472	-0.7318	1.48102e-06	1.26686e-05
EFL1	1198.3	0.44979	0.45914	1.48367e-06	1.26844e-05
FSCN1	5602.1	-0.52851	-0.54375	1.49224e-06	1.27508e-05
TMEM155	166.8	-0.88002	-0.95516	1.5174e-06	1.29588e-05
YY1	3065.5	0.38295	0.38862	1.5332e-06	1.30811e-05
CYB5R3	18153.2	-0.33746	-0.34132	1.53339e-06	1.30811e-05
ERCC6L	18	-1.57464	-2.49889	1.55414e-06	1.32509e-05
PI4K2A	1740.6	0.54483	0.56171	1.57961e-06	1.34563e-05
RPRD1A	1458	0.48211	0.49355	1.57993e-06	1.34563e-05
ABHD17B	263.6	-0.73046	-0.77485	1.58096e-06	1.34578e-05
KANK4	607.2	-0.72811	-0.76845	1.58306e-06	1.34684e-05
YTHDF2	1625.9	0.41586	0.42309	1.591e-06	1.35287e-05
CEBPZOS	727.5	0.59757	0.62012	1.60615e-06	1.36501e-05
C16orf87	314.8	0.78947	0.84359	1.60963e-06	1.36723e-05
TMEM33	1144	0.48	0.49116	1.61115e-06	1.36778e-05
PIK3R1	2491.8	0.62602	0.65226	1.61304e-06	1.36865e-05
ELOVL4	271.1	0.80657	0.86562	1.61496e-06	1.36955e-05
CDKN1C	97.1	-1.06264	-1.20979	1.62273e-06	1.3754e-05
POLD1	197.1	-0.83874	-0.90595	1.62914e-06	1.38009e-05
COPA	11919.6	-0.44713	-0.45633	1.66128e-06	1.40634e-05
USP4	1977.2	-0.41613	-0.42351	1.66219e-06	1.40634e-05
KSR1	674.3	-0.61537	-0.64057	1.66281e-06	1.40634e-05
LONRF1	419.2	-0.6929	-0.72994	1.68006e-06	1.42017e-05
GLIPR1	3655	-0.47735	-0.48861	1.68502e-06	1.42359e-05
WBP2	2249.7	0.42792	0.43594	1.69322e-06	1.42972e-05
WNT5A	15857.7	-0.57062	-0.59023	1.69408e-06	1.42972e-05
NIPBL	2640.6	0.48021	0.49165	1.7028e-06	1.43631e-05
SEMA6D	457.2	0.70683	0.74885	1.70633e-06	1.43852e-05
GPR176	7971.9	0.43702	0.44554	1.71891e-06	1.44835e-05
NUDT18	414.9	-0.77389	-0.8254	1.72181e-06	1.45002e-05
HERC6	1688	1.45118	2.06189	1.75799e-06	1.47967e-05
LINC00963	1438.7	0.46577	0.47634	1.7589e-06	1.47967e-05
CCSER2	2343.3	0.4958	0.50842	1.7599e-06	1.47972e-05
PPIL1	1285.2	-0.44715	-0.45623	1.76383e-06	1.48224e-05
DOK5	547.9	0.70919	0.74994	1.77283e-06	1.48901e-05
STK24	4350.1	0.55706	0.57547	1.77744e-06	1.49209e-05
XIAP	1563.5	0.629	0.65613	1.80249e-06	1.5123e-05
ATP1A1	16450.6	0.39218	0.39835	1.81027e-06	1.51803e-05
RP11-135F9.3	153.3	0.9364	1.0473	1.81203e-06	1.51869e-05
CLEC14A	216.3	-0.97421	-1.0952	1.82336e-06	1.52704e-05
TICRR	35.7	-1.45374	-2.02155	1.82392e-06	1.52704e-05
SPECC1L	1043.2	-0.47209	-0.48302	1.83223e-06	1.53318e-05
MDC1	892	-0.56113	-0.57972	1.84459e-06	1.5427e-05
RP11-51F16.1	86.9	-1.13156	-1.35409	1.84593e-06	1.543e-05
NREP	17813.4	-0.57655	-0.59682	1.87517e-06	1.56661e-05
ITGA8	173.4	0.89525	0.98484	1.89601e-06	1.58319e-05
LRRC58	1144.1	0.56887	0.58775	1.89821e-06	1.58418e-05
ZBTB20	156.8	1.13453	1.33536	1.90333e-06	1.58762e-05
SAV1	1074.5	0.57962	0.60072	1.9266e-06	1.60618e-05
ATXN7L3B	3301.4	-0.40213	-0.4088	1.93331e-06	1.61092e-05
CDADC1	234.7	0.84187	0.91372	1.9403e-06	1.61589e-05
COL4A1	33895.3	-0.64795	-0.67763	1.94164e-06	1.61615e-05
HPS1	4053	0.37288	0.37822	1.94993e-06	1.6222e-05
COPZ2	2405.8	-0.47029	-0.48124	1.95532e-06	1.62507e-05
LMAN2	3861.8	-0.36244	-0.36734	1.95545e-06	1.62507e-05
INCENP	334.2	-0.71462	-0.75447	1.96882e-06	1.63532e-05
AGK	721.4	-0.51626	-0.53094	1.98099e-06	1.64457e-05
ZKSCAN7	187	-0.89267	-0.9795	1.98612e-06	1.64795e-05
DSCR3	2812.7	0.42271	0.43058	1.988e-06	1.64865e-05
FUBP3	2350.3	0.48597	0.49809	2.00399e-06	1.66103e-05
AP4S1	254.2	0.73745	0.78242	2.02866e-06	1.6806e-05
SHANK1	150.2	-0.96941	-1.09553	2.04579e-06	1.6939e-05
PGF	604.5	0.70373	0.74358	2.06754e-06	1.71101e-05
SLC25A36	1159.8	0.48909	0.50145	2.10264e-06	1.73914e-05
ETFDH	907.6	0.48717	0.49924	2.10441e-06	1.7397e-05
CAMLG	885.8	0.48217	0.49401	2.11389e-06	1.74662e-05
HIST1H1C	180.7	0.83554	0.90356	2.11623e-06	1.74764e-05
PNKD	650.4	-0.5505	-0.56805	2.11943e-06	1.74936e-05
DARS2	771.1	-0.49447	-0.50714	2.13048e-06	1.75756e-05
SFT2D2	1234.3	-0.61828	-0.64456	2.13956e-06	1.76413e-05
METRNL	3509.7	0.41528	0.42274	2.14811e-06	1.76988e-05
PPP1R10	3115.4	0.54914	0.5669	2.14878e-06	1.76988e-05
TNRC6A	3785.3	0.3585	0.36324	2.15913e-06	1.77748e-05
SEMA3F	498.5	0.67609	0.71008	2.16706e-06	1.78308e-05
RNF103	854.6	0.50827	0.52219	2.20455e-06	1.81297e-05
CCDC43	872.7	0.52053	0.53547	2.20627e-06	1.81344e-05
AK9	89.5	1.08502	1.26859	2.21017e-06	1.8157e-05
NIPSNAP3A	827.6	-0.57409	-0.59509	2.24291e-06	1.84164e-05
ELL	598.3	0.58782	0.60996	2.25257e-06	1.84819e-05
IDO1	189.2	1.55437	4.2134	2.25324e-06	1.84819e-05
KIAA1217	506.7	0.59793	0.62183	2.25472e-06	1.84845e-05
ZNF184	257.6	-0.8108	-0.87422	2.26089e-06	1.85255e-05
C3orf80	58.2	-1.36018	-1.81336	2.27015e-06	1.85916e-05
HCN2	200.5	-0.80729	-0.87142	2.27137e-06	1.8592e-05
UBR3	1739.3	0.55092	0.569	2.28041e-06	1.86563e-05
CHKA	281.6	0.94416	1.04694	2.28286e-06	1.86667e-05
PDZD8	1399.8	0.44996	0.45945	2.28783e-06	1.86976e-05
ZNF91	257.3	0.71546	0.75685	2.30147e-06	1.87993e-05
JAK1	13126	0.41644	0.42402	2.30859e-06	1.88477e-05
TOB2	2303.5	0.45495	0.46484	2.31119e-06	1.88592e-05
GADD45A	1538.5	0.71166	0.75381	2.31681e-06	1.88952e-05
ZFPM1	274.8	0.75729	0.80895	2.32296e-06	1.89356e-05
ZFHX3	1389.9	0.63558	0.66441	2.34512e-06	1.91063e-05
NDRG3	908.5	-0.64165	-0.67128	2.39255e-06	1.94827e-05
NCALD	155	-0.92251	-1.02458	2.40448e-06	1.95698e-05
FYN	2090.9	0.39867	0.40531	2.40794e-06	1.95878e-05
EME1	19.9	-1.54084	-2.70159	2.42922e-06	1.97469e-05
LCMT2	394.7	-0.65211	-0.68359	2.43e-06	1.97469e-05
VWCE	245.8	0.87303	0.96358	2.4428e-06	1.98407e-05
APBB1IP	602.2	0.53662	0.55346	2.46331e-06	1.9997e-05
MX2	1923.6	1.49423	2.37396	2.46708e-06	1.99989e-05
ETFA	2410.2	0.41245	0.41981	2.46728e-06	1.99989e-05
GDNF-AS1	36.6	1.41459	2.02897	2.46736e-06	1.99989e-05
SCPEP1	3422.5	0.42143	0.42933	2.47536e-06	2.00535e-05
TUFT1	379.3	-0.81735	-0.88045	2.4848e-06	2.01196e-05
SH3BGRL3	12896.8	-0.43784	-0.44679	2.48627e-06	2.01212e-05
EXOSC9	719.7	-0.63433	-0.66246	2.48861e-06	2.01298e-05
MT1M	18.2	-1.556	-3.06976	2.49439e-06	2.01662e-05
PFKM	1980.5	0.41482	0.42233	2.57628e-06	2.08175e-05
ZBTB34	569	0.63199	0.65983	2.5844e-06	2.08724e-05
FGF13	99.5	0.99421	1.11969	2.59002e-06	2.09072e-05
CDC34	1551.7	0.44697	0.45644	2.59948e-06	2.09728e-05
TAGLN	40737.1	-0.65973	-0.69206	2.60155e-06	2.09787e-05
MTF2	442.5	0.64142	0.67096	2.60425e-06	2.09897e-05
VIPAS39	1000.9	-0.4859	-0.49813	2.62255e-06	2.11265e-05
TRDMT1	214.3	0.84505	0.91828	2.65999e-06	2.14171e-05
DYNC1I2	2270.1	-0.41897	-0.42686	2.67437e-06	2.15219e-05
MYL12B	10043.1	-0.37013	-0.3755	2.71852e-06	2.18661e-05
PDHB	2332.9	-0.41256	-0.41995	2.73376e-06	2.19775e-05
SLC35B3	1530.2	0.4478	0.45751	2.73696e-06	2.19919e-05
TBCB	1841.4	-0.39975	-0.40654	2.74131e-06	2.20157e-05
POP5	364.5	-0.6343	-0.66372	2.74803e-06	2.20584e-05
ALDH2	1367.1	0.47816	0.48994	2.79908e-06	2.24567e-05
PIGK	1595.6	-0.46831	-0.47955	2.80827e-06	2.2519e-05
EP300	3831.2	0.38946	0.39571	2.81374e-06	2.25514e-05
VPS41	2454.4	0.41493	0.42263	2.8566e-06	2.28833e-05
GBE1	6025	0.49634	0.50964	2.86042e-06	2.29023e-05
HMMR	46.6	-1.42585	-1.95894	2.87099e-06	2.29752e-05
UVRAG	809.2	0.50394	0.5179	2.8787e-06	2.30252e-05
UBALD2	674.2	0.52316	0.53885	2.88612e-06	2.30728e-05
PBRM1	3119.2	0.45156	0.46147	2.88977e-06	2.30903e-05
BX322557.10	162.8	-0.88458	-0.97048	2.91625e-06	2.32901e-05
EIF2B2	955.4	-0.47493	-0.48662	2.9257e-06	2.33439e-05
FKRP	1118.4	0.48519	0.49761	2.92595e-06	2.33439e-05
MYBL1	309.2	-0.7978	-0.85944	2.95515e-06	2.3565e-05
PI4KA	3302.5	0.43297	0.4417	2.96003e-06	2.35919e-05
CALM1	6800.1	-0.38458	-0.39068	2.96717e-06	2.36369e-05
PAX8-AS1	786.8	-0.54896	-0.5683	2.9726e-06	2.36682e-05
MFN1	1868.7	0.44252	0.45192	2.98153e-06	2.37273e-05
SMIM25	21	1.50729	2.35655	2.98543e-06	2.37464e-05
SATB2	235.6	0.80478	0.86995	2.99553e-06	2.38147e-05
SPG20	3868.3	0.57206	0.59282	3.01154e-06	2.39299e-05
NUDT3	1023.1	-0.47948	-0.49177	3.02289e-06	2.39982e-05
SLC17A9	1233.4	-0.52757	-0.54399	3.02318e-06	2.39982e-05
SELPLG	236.8	0.81	0.87585	3.04167e-06	2.41329e-05
QSOX1	32794.9	0.32471	0.32834	3.06618e-06	2.43151e-05
UHRF1BP1L	2060.2	0.54617	0.56433	3.07268e-06	2.43544e-05
TP53BP2	1751	0.42443	0.43267	3.10035e-06	2.45613e-05
IFIT5	1729.2	0.57185	0.59299	3.1037e-06	2.45755e-05
HS1BP3	1178.2	0.4803	0.49237	3.11056e-06	2.46174e-05
ATAD2B	511.4	0.60064	0.62467	3.13236e-06	2.47775e-05
ZNF468	372.3	0.68758	0.72514	3.16528e-06	2.50254e-05
TNXB	9314.5	0.57577	0.59726	3.20653e-06	2.53388e-05
NKIRAS1	366.7	0.60573	0.63004	3.21287e-06	2.53762e-05
GAPVD1	2501.3	0.51607	0.53122	3.249e-06	2.56487e-05
STRA6	172.7	-1.0304	-1.17633	3.28149e-06	2.58775e-05
SMARCA5	5870.1	0.69897	0.73884	3.28265e-06	2.58775e-05
[truncated: 3,606 more rows]
