# Supplementary material for: Ribosome biogenesis restricts innate immune responses to virus infection and DNA
Source: eLife journal article supplement (doi:10.7554/elife.49551), 2019-12-16
Supplement: supp [file elife-49551-supp-v1.zip › elife_poa_e49551_Supplementary_file_2.xlsx]

## Sheet: TIF-IA_siRNA vs Control_siRNA
gene	baseMean	log2FC	log2FCunshrunk	pvalue	padj
POU2F2	1499.4	2.81521	2.9167	0	0
RRN3	717.8	-3.30719	-3.50212	0	0
ACTG1	88900.2	-2.23145	-2.29005	0	0
DRAM1	9947.9	1.69141	1.71909	0	0
PSG5	7153.1	1.80497	1.84126	0	0
PRNP	8426.7	-2.07005	-2.12741	0	0
TECPR2	1999.4	1.78058	1.81903	0	0
SMIM15	1134.3	1.86591	1.91203	0	0
TNFRSF10C	490.9	2.63245	2.78401	0	0
MAMDC2	1324.6	2.35628	2.45631	0	0
FAM198B	2198.8	1.57686	1.60588	0	0
DESI2	2438.4	1.63985	1.67355	0	0
HNRNPAB	4072.8	-1.52246	-1.55015	0	0
CELF2	548.5	2.44223	2.56665	0	0
SPATA18	2641.3	1.6364	1.67196	0	0
PIGS	2440.4	-1.67674	-1.71699	0	0
ARL2BP	1955.7	-1.59903	-1.63257	0	0
CDKN1A	53346.9	1.51137	1.54086	0	0
RASSF2	1371.6	1.74889	1.79236	0	0
GNPNAT1	2637.6	1.63637	1.67594	0	0
ATP8B1	3923.1	1.43243	1.45996	0	0
VPS4B	1478.9	1.55652	1.59319	0	0
SRSF9	2006	-1.39065	-1.41746	0	0
PAPPA	8511	1.5415	1.57739	0	0
IL6ST	16968.8	-1.54522	-1.58126	0	0
SLC2A3	3952.8	-1.56542	-1.60506	0	0
SLC25A24	1323.7	-1.58015	-1.62185	0	0
SESN1	1355.4	1.60589	1.64754	0	0
NAA50	4303.7	1.48139	1.51415	0	0
TOP2A	470.9	-2.40574	-2.54984	0	0
DIO2	1679.3	-1.6063	-1.64872	0	0
MINPP1	1030.4	1.59987	1.64362	0	0
DPM1	918	-1.7879	-1.85336	0	0
H3F3B	8031.7	-1.3112	-1.33508	0	0
SLC38A4	454.4	-2.69027	-2.96825	0	0
ACTC1	3873.9	-2.24159	-2.37449	0	0
HMGB2	438.4	-2.00606	-2.09735	0	0
RRM2	237.9	-2.64846	-2.87916	0	0
KIF20A	149	-3.17642	-3.60543	0	0
BTG2	1221	1.81767	1.8917	0	0
GABARAPL1	5472.6	-1.8736	-1.95551	0	0
NT5E	12907	1.23326	1.25555	0	0
F2RL1	1061.7	1.62872	1.68365	0	0
PLXNB1	1742.2	1.25307	1.27837	0	0
SCD	12128.2	-1.24395	-1.26939	0	0
BTBD3	773.4	-1.609	-1.66705	0	0
UBE2G2	1667	1.2156	1.24062	0	0
PRC1	381.2	-1.91223	-2.00807	0	0
ECE1	14258	0.97271	0.98546	0	0
CXCL12	28266.9	-1.44918	-1.49306	0	0
CCT3	5629.4	-1.04237	-1.05833	0	0
CYFIP2	293.3	2.41055	2.64822	0	0
LPXN	1264.9	1.21474	1.24009	0	0
CENPF	230.5	-2.48837	-2.73357	0	0
ZCCHC24	3236.4	-1.01844	-1.03376	0	0
CDC20	135.1	-2.97062	-3.46033	0	0
HSPA4L	464.7	1.96582	2.08826	0	0
MYO1D	7550	-1.42172	-1.46638	0	0
MIR503HG	675.1	-1.78093	-1.86588	0	0
COL11A1	8523.5	-1.12054	-1.14182	0	0
ISCU	3176.9	1.06966	1.08799	0	0
ANLN	410.1	-2.31281	-2.51719	0	0
GPC1	15259.5	0.97463	0.98871	0	0
TACC1	3291.9	-1.12832	-1.15131	0	0
UBE2C	88.9	-3.14127	-3.876	0	0
TSPAN11	501.7	1.55647	1.61741	0	0
GMNN	252.4	-2.24138	-2.47764	0	0
SETD7	4536.8	1.18314	1.20978	0	0
ZDHHC20	1046	-1.3151	-1.35175	0	0
RBMS1	3850.7	-1.09228	-1.11352	0	0
PLXNB2	23381.2	0.86389	0.87428	0	0
ACSL4	3201.8	-1.39298	-1.44029	0	0
TMEM2	5267.4	1.24515	1.27729	0	0
FDXR	1160.8	1.56863	1.63476	0	0
RPL22L1	1140.3	-1.64688	-1.72563	0	0
ST13	1618.2	1.14175	1.16767	0	0
OSTM1	2430.6	1.28949	1.32547	0	0
TK1	236	-2.33559	-2.57046	0	0
LYNX1	2575.2	1.06906	1.08976	0	0
CDS2	1484.2	1.16503	1.19166	0	0
MTMR12	628.7	-1.50157	-1.56314	0	0
ELK3	4157.8	1.06135	1.08187	0	0
PTBP3	1852.9	-1.22031	-1.25248	0	0
MKI67	282.8	-2.54923	-2.8918	0	0
WDR63	272.9	1.96469	2.11479	0	0
KCNMA1	4156	1.05772	1.07876	0	0
ASAP1	4889.9	0.89339	0.90587	0	0
RCAN2	1539.6	1.18157	1.21261	0	0
CCDC50	4374.6	1.01699	1.03589	0	0
E2F7	2170.3	1.1184	1.14383	0	0
LMNB1	152.7	-2.48024	-2.79881	0	0
DDB2	1290.2	1.50621	1.5723	0	0
ARL1	3216.5	-1.02876	-1.04905	0	0
CHPF	7995.3	0.99086	1.00875	0	0
SHCBP1	133.1	-2.60145	-3.0134	0	0
TPX2	514.6	-1.53075	-1.59922	0	0
RHOJ	2272.9	1.08603	1.10982	0	0
LINC00294	551.7	1.54536	1.61756	0	0
SSU72	2330.3	0.99188	1.01022	0	0
SLC7A8	1863.6	-1.4719	-1.53763	0	0
KIF2C	172.2	-2.06732	-2.24715	0	0
ASS1	8548.3	-1.01092	-1.03073	0	0
NOV	1023.9	1.712	1.82081	0	0
DPYSL4	998.4	1.23352	1.27098	0	0
SLC35B4	756.9	-1.29365	-1.33585	0	0
GTPBP2	4193.8	-1.04371	-1.0668	0	0
TNFRSF10B	9771.9	0.91702	0.93214	0	0
STMN1	1100.8	-1.1966	-1.2294	0	0
DLGAP5	84.8	-2.68575	-3.1595	0	0
NIPAL3	2670.8	1.10481	1.13159	0	0
TIGAR	1309.4	1.14478	1.17494	0	0
RYBP	3621.3	1.29324	1.33711	0	0
RRM1	1405.3	-1.04315	-1.06633	0	0
CCNA2	281.2	-1.65397	-1.75149	0	0
CSGALNACT2	1980.5	1.24964	1.29086	0	0
EVC	4670	0.86324	0.87626	0	0
HOXA10	707.1	-1.29472	-1.34311	0	0
ERMP1	880.8	-1.16829	-1.20455	0	0
SOWAHC	467.8	-1.86695	-2.03255	0	0
STX6	1680.3	0.99457	1.01475	0	0
SEC24A	3268.6	1.27036	1.31409	0	0
ATF1	489.2	-1.57686	-1.67597	0	0
MAMLD1	1179.7	1.20351	1.23989	0	0
VAMP4	934.9	1.3287	1.37915	0	0
PDGFC	2256.6	0.94199	0.95927	0	0
CCNC	1192.2	1.16375	1.19739	0	0
ASPM	201.6	-2.07727	-2.30362	0	0
ZMAT3	5490.5	1.07638	1.10305	0	0
PLCB1	874.4	1.18491	1.22005	0	0
MARCH4	2345.9	1.08046	1.107	0	0
PRELP	3222.1	1.05521	1.08053	0	0
PRKX	332.2	1.57904	1.67299	0	0
CALD1	37455.1	-1.49673	-1.57345	0	0
SLC30A9	2016.5	0.94035	0.95808	0	0
IFITM2	6584.9	-1.00825	-1.0305	0	0
CEP55	136.7	-2.39305	-2.74367	0	0
PPM1A	1403.6	1.04299	1.06755	0	0
CHRDL1	1969.9	0.95057	0.96907	0	0
KANK4	607.2	-1.62669	-1.72924	0	0
EAF1	588.3	-1.22933	-1.26983	0	0
SPRY2	1761.6	1.22792	1.26964	0	0
BBC3	1197	1.13613	1.17022	0	0
TNFRSF10D	2530.8	1.10716	1.13857	0	0
LAMP1	20496.9	0.67386	0.68053	0	0
SEMA6D	457.2	1.49908	1.57935	0	0
ARSD	615.4	-1.39017	-1.45672	0	0
VWCE	245.8	1.86946	2.03484	0	0
KCTD5	912.6	-1.16312	-1.19914	0	0
POLH	1403.8	0.96909	0.98982	0	0
ZADH2	1821.8	-1.07664	-1.10562	0	0
CCP110	1033.3	0.9819	1.00302	0	0
NEDD4	1760.2	1.20329	1.24501	0	0
INPP5A	1342.7	1.15524	1.19159	0	0
TMED5	2337.2	-1.16705	-1.20637	0	0
CDC25B	2494.2	-0.91179	-0.92959	0	0
CCNB1	364.5	-1.52571	-1.61641	0	0
PLK1	146.6	-2.29638	-2.6438	0	0
TTC3	7621.3	0.83843	0.85216	0	0
SLC35A3	428.2	1.4631	1.54338	0	0
DCUN1D3	630.4	1.23141	1.2772	0	0
TGM2	5376	-1.18303	-1.22314	0	0
ADGRE5	2010.6	-0.85465	-0.86977	0	0
SUSD1	791.5	-1.21637	-1.25807	0	0
CLDN12	744.2	-1.1407	-1.17781	0	0
RDX	2289.9	-1.0225	-1.04926	0	0
ZDHHC18	913.3	-1.10608	-1.14025	0	0
PCK2	3724.6	-1.17435	-1.21494	0	0
PRR11	113	-2.24476	-2.61409	0	0
EGFR	9379.5	0.93089	0.95086	0	0
SPAG5	125	-2.08779	-2.3586	0	0
NYNRIN	2476.4	1.06756	1.09801	0	0
F2RL2	1200.9	1.13339	1.1712	0	0
STK32B	946.3	1.16013	1.19958	0	0
ASPN	565.8	-1.50996	-1.60847	0	0
NUSAP1	107.3	-2.25895	-2.62166	0	0
MRPS35	1183.5	-0.97226	-0.99543	0	0
ARHGAP22	1667.6	1.31386	1.37289	0	0
GUCY1A2	424.8	1.47802	1.56671	0	0
CAMSAP2	3465.1	0.88901	0.90676	0	0
ATP11C	1290.8	-1.10435	-1.13974	0	0
PODXL	815	1.10473	1.13818	0	0
DTL	69.5	-2.54596	-3.15977	0	0
CD46	7304.4	0.70058	0.70916	0	0
PTP4A1	6626.8	0.96365	0.98642	0	0
KIFC1	106.5	-2.13554	-2.41105	0	0
IER3IP1	687.2	1.25337	1.30649	0	0
NFATC2	227.5	1.91227	2.10644	0	0
KIF18B	55.4	-2.7066	-3.4697	0	0
PPM1D	824.1	1.07605	1.10925	0	0
FAM180A	950.5	1.19802	1.24496	0	0
LOX	36339.8	0.69963	0.70837	0	0
SEMA5A	11833.4	1.02953	1.0581	0	0
FBXO22	1418.5	0.87827	0.89587	0	0
BLOC1S2	1907.6	0.79694	0.8098	0	0
BUB1	110.4	-2.30179	-2.75229	0	0
GALNT5	4446.7	0.83874	0.85415	0	0
FAS	4543	1.15325	1.19566	0	0
FAM43A	974	1.32885	1.39395	0	0
CTD-2033D15.2	459	-1.60915	-1.72185	0	0
RRM2B	2744.7	1.22669	1.2786	0	0
SLC17A5	2075.4	0.96729	0.99187	0	0
CDCA3	66.7	-2.39745	-2.91346	0	0
PCSK9	1208.4	-1.00005	-1.02958	0	0
PIDD1	904.9	1.55639	1.67045	0	0
CNN2	11105.1	-0.66935	-0.67734	0	0
TIMP2	57390.9	0.63222	0.63901	0	0
MID1	1492.2	1.0354	1.06696	0	0
VMP1	2687.5	-0.77876	-0.79184	0	0
RGS20	168.1	1.91743	2.16479	0	0
SDPR	160.6	2.12965	2.48965	0	0
AURKB	62.1	-2.5929	-3.6099	0	0
CEBPG	1748.6	-1.11904	-1.15984	0	0
MYBL2	120.7	-2.13943	-2.48396	0	0
ELFN1	1799.6	1.16949	1.21538	0	0
BACH1	3120.4	1.04738	1.08046	0	0
TCF19	152.7	-1.88062	-2.09646	0	0
VIT	278.5	1.46898	1.56475	0	0
FAM83D	75.8	-2.36894	-2.94873	0	0
SMURF2	6171.3	0.72348	0.73408	0	0
DCLK1	541.8	1.14169	1.18582	0	0
CD59	28048.8	0.65412	0.66192	0	0
HJURP	69.5	-2.3885	-2.89203	0	0
VSTM4	1718.1	0.96627	0.99205	0	0
HEATR1	2457.8	0.89392	0.91445	0	0
IQGAP3	96.4	-2.35987	-2.88096	0	0
ARHGAP5	2331.9	1.05557	1.09077	0	0
MOXD1	14051.5	0.69627	0.70587	0	0
CHST2	1132.2	1.06088	1.09596	0	0
PLOD2	4908.1	-1.04367	-1.07811	0	0
S1PR2	830.5	1.14542	1.19143	0	0
PBK	55.6	-2.49987	-3.25402	0	0
STMN3	188.3	1.69056	1.83488	0	0
SDC4	8613.3	0.68489	0.69409	0	0
CPEB2	1440.1	1.03087	1.06435	0	0
ME1	1477.2	-1.10882	-1.15184	0	0
ANGPT1	720.5	-1.28079	-1.34679	0	0
UBL3	3328.7	0.92644	0.95004	0	0
SEPT6	712.4	-1.00975	-1.04078	0	0
RP11-597D13.9	340.2	1.88769	2.14598	0	0
ELFN2	1049.9	0.95909	0.98488	0	0
FLRT2	2371	1.04298	1.07734	0	0
NID2	10606.3	-0.71002	-0.72061	0	0
BIRC5	116.3	-2.16356	-2.55063	0	0
NTN1	893	1.04346	1.07752	0	0
CDC6	122.7	-1.90759	-2.14612	0	0
RAF1	3020.2	-0.69664	-0.70666	0	0
CDK17	1748.9	0.80698	0.82268	0	0
KDSR	3359	0.92652	0.95097	0	0
PRSS12	8266.9	0.92509	0.94923	0	0
GADD45A	1538.5	1.32613	1.40227	0	0
SLC22A23	972.8	-1.1368	-1.188	0	0
FHL3	1555.8	-0.86175	-0.88111	0	0
MCM6	931.1	-0.97075	-0.99903	0	0
IKBIP	2029.2	0.89361	0.91546	0	0
PTGFRN	2879.4	0.80625	0.82211	0	0
LINC00094	1312.7	0.78605	0.80091	0	0
DDAH1	6502	-1.29221	-1.36394	0	0
ZNF219	2147.5	0.98622	1.01632	0	0
CCNB2	114.9	-1.95864	-2.24892	0	0
LXN	868.7	-1.05723	-1.09392	0	0
DNASE1L1	909.7	-1.00911	-1.04094	0	0
NXPH4	368.2	-1.36716	-1.46371	0	0
HMGA1	11577.2	0.7515	0.76448	0	0
SLC4A7	3206.5	0.89359	0.91605	0	0
TRIP13	138.2	-1.7229	-1.89852	0	0
GAL3ST4	692.7	1.12277	1.16764	0	0
LRRC58	1144.1	-1.08239	-1.12495	0	0
BMPER	2957.6	0.91413	0.93817	0	0
ECI1	733.4	-0.94333	-0.97015	0	0
HIST1H2AC	659.5	1.05856	1.09812	0	0
ENPP2	6680.4	-0.74835	-0.7614	0	0
SH2D5	388.9	1.24865	1.31853	0	0
NCAPG	130.4	-1.90079	-2.17416	0	0
SGMS2	1103.1	0.99272	1.02488	0	0
TNFSF4	692.7	-1.34853	-1.43227	0	0
SASH1	4310.5	0.68912	0.6993	0	0
LEPROTL1	714.5	-1.00769	-1.04161	0	0
CDCA8	96.7	-2.0417	-2.34848	0	0
RPS27L	4490.8	-0.71602	-0.728	0	0
SGK1	3722.1	1.00676	1.0404	0	0
WDR62	60.8	-2.30294	-2.964	0	0
MPLKIP	321.4	-1.37982	-1.47796	0	0
NREP	17813.4	-1.0417	-1.07865	0	0
COL6A6	137.6	1.86774	2.11991	0	0
YIPF6	1639.2	0.86567	0.88658	0	0
ERAP1	6243.3	-0.7759	-0.79102	0	0
LMOD1	1505.3	-0.88377	-0.90532	0	0
TRAPPC6B	828.1	1.07287	1.1147	0	1e-15
SVIL	1643.4	0.83637	0.85551	0	1e-15
PRKAR2A	2627.9	-0.89166	-0.91518	0	1e-15
ITGB1	62560.2	0.7732	0.7881	0	1e-15
CFD	636.4	-1.12445	-1.17207	0	1e-15
DPY19L3	1630.9	0.92839	0.95459	0	1e-15
MIR34AHG	423	1.52539	1.66131	0	1e-15
SYT11	1528.3	1.01125	1.04543	0	1e-15
FAM210B	2880.5	0.85067	0.87085	0	1e-15
SOCS4	727.6	1.0438	1.08153	0	1e-15
MDK	1470.5	-0.75683	-0.77069	0	1e-15
TACC3	350.2	-1.25339	-1.32541	0	1e-15
PARD6G	70.7	2.1889	2.72508	0	1e-15
CEP97	283.4	-1.32589	-1.40814	0	1e-15
MINDY2	1130	1.03058	1.06742	0	2e-15
SLC12A4	5016.6	0.66237	0.6719	0	2e-15
MAN2A1	5779.4	0.72507	0.73761	0	2e-15
REV3L	5313.3	0.93785	0.96596	0	2e-15
KIF23	347	-1.28393	-1.35573	0	2e-15
CLCA2	153.7	1.66092	1.85338	0	2e-15
EDA2R	1845.5	1.03891	1.07792	0	2e-15
PLA2G15	1740.8	0.75437	0.76866	0	2e-15
CTBP1	2921.3	0.78522	0.80149	0	2e-15
NDC80	82.1	-2.0843	-2.5406	0	2e-15
BUB1B	57.4	-2.35025	-3.05412	0	3e-15
ASXL2	1613.5	-0.83554	-0.85509	0	3e-15
CPXM2	2576.2	0.65755	0.66695	0	3e-15
IDS	2134.5	0.71796	0.73038	0	3e-15
STOM	8166.5	0.73644	0.74999	0	3e-15
GCC2	1570.3	0.81579	0.83428	0	3e-15
IFITM3	18623.3	-0.76531	-0.78058	0	4e-15
DEPDC1	42.9	-2.49643	-3.62826	0	4e-15
TMEM19	296	-1.36052	-1.46229	0	4e-15
GAS5	7280.9	-0.72652	-0.73959	0	4e-15
DKK1	12116.2	0.64963	0.65883	0	4e-15
ANGPTL4	551.2	1.40899	1.52465	0	6e-15
RECK	11588.9	-0.65493	-0.66447	0	6e-15
FAM96A	536.8	-1.03303	-1.07444	0	7e-15
MCFD2	13364.5	0.80897	0.82734	0	7e-15
NADSYN1	2111.8	0.69241	0.70382	0	7e-15
OSBPL3	4617.1	0.8084	0.82669	0	7e-15
TWISTNB	528.3	-1.11622	-1.17104	0	8e-15
FOXN2	633.8	1.02401	1.06368	0	8e-15
RASA2	1668	0.88592	0.91087	0	1e-14
MAP3K7CL	914.9	1.01283	1.05125	0	1.3e-14
VEGFA	4333.7	-0.76733	-0.78361	0	1.3e-14
IDH1	3798.9	-0.76062	-0.77658	0	1.3e-14
KCTD9	1060.7	-1.0151	-1.05408	0	1.4e-14
ARHGAP11A	321.9	-1.33966	-1.43305	0	1.4e-14
PARP1	2125.7	-0.80468	-0.82308	0	1.4e-14
CDK4	4424.4	-0.67431	-0.68535	0	1.5e-14
PRDX6	17189.8	-0.62909	-0.63779	0	1.7e-14
DCHS1	4045.7	0.70948	0.72199	0	1.8e-14
BLMH	1527.1	-0.89974	-0.92661	0	1.8e-14
PC	427.4	-1.19642	-1.2615	0	1.8e-14
CKAP2L	84	-2.01608	-2.41148	0	1.9e-14
TRAK1	4734.4	0.86485	0.8882	0	2.1e-14
ERC1	3271.5	0.93302	0.96285	1e-15	2.1e-14
TSPYL5	759.9	-0.92912	-0.95857	1e-15	2.3e-14
FGD4	532.5	1.01374	1.05184	1e-15	2.3e-14
SLC7A11	6103.5	0.86262	0.88601	1e-15	2.7e-14
MFSD6	433.3	1.08795	1.13811	1e-15	2.8e-14
PTPRM	4819.7	0.70151	0.71394	1e-15	2.9e-14
DPP9	1826	-0.76627	-0.78308	1e-15	3.3e-14
LYSMD3	890.5	0.98061	1.01592	1e-15	3.6e-14
KDM1B	614.4	-0.97619	-1.01195	1e-15	3.9e-14
CD276	9657	0.66201	0.67257	1e-15	4.3e-14
MYL6	24698.7	-0.63132	-0.64038	1e-15	4.6e-14
GYS1	1694.8	-0.69691	-0.7092	1e-15	5.1e-14
TMEM43	7435.8	0.58471	0.59197	1e-15	5.9e-14
KIF14	77.6	-2.034	-2.4648	2e-15	6.4e-14
LMO4	2865.7	-0.76364	-0.78047	2e-15	7.2e-14
ELOVL5	3804.5	-0.74266	-0.75739	2e-15	7.2e-14
MTCH1	9895.1	-0.58527	-0.59259	2e-15	7.3e-14
TYMS	860.8	1.06969	1.117	2e-15	7.8e-14
TRIM22	4876.1	0.95523	0.98915	2e-15	8.7e-14
MDM2	6511.9	1.63179	1.83405	3e-15	1.02e-13
PMEPA1	1695.4	1.1879	1.25623	3e-15	1.14e-13
KIF4A	80	-1.99858	-2.39323	3e-15	1.18e-13
CMBL	920.9	1.04693	1.09134	3e-15	1.22e-13
GDNF	359.7	1.51663	1.67515	3e-15	1.23e-13
TYW3	1068.2	-0.80779	-0.82851	3e-15	1.25e-13
BTG1	2949.6	0.79029	0.80923	3e-15	1.26e-13
CDH13	1540.8	0.76526	0.7825	4e-15	1.39e-13
ITGA4	4481.5	0.7283	0.74308	4e-15	1.61e-13
KDELR2	12902.3	0.57009	0.57705	4e-15	1.62e-13
RP5-1039K5.12	478.9	1.03005	1.07448	4e-15	1.62e-13
NORAD	7452.1	0.66104	0.67195	4e-15	1.7e-13
ABHD2	1849.6	0.75108	0.76729	4e-15	1.73e-13
RAB3B	7922.8	0.96258	0.99779	5e-15	2.02e-13
B3GNT9	1911.6	0.75837	0.77532	5e-15	2.08e-13
NRP1	11807.3	0.66738	0.67873	6e-15	2.13e-13
QSOX2	1027.9	0.73944	0.75486	6e-15	2.18e-13
PIP4K2A	2614.8	0.67953	0.69168	6e-15	2.24e-13
ENAH	6785.3	-0.99435	-1.03411	6e-15	2.34e-13
STC1	891	1.26235	1.3495	7e-15	2.49e-13
MAFK	878.2	0.8606	0.88595	7e-15	2.49e-13
SFXN1	2014.9	0.72189	0.73628	7e-15	2.6e-13
ANK1	397	1.07278	1.12303	7e-15	2.81e-13
SDK1	772.9	0.90522	0.93438	7e-15	2.81e-13
ARL4C	792.8	1.07418	1.12561	8e-15	2.86e-13
CARHSP1	1094.9	-0.80174	-0.82249	8e-15	2.91e-13
FCHO2	902.8	0.92197	0.95418	9e-15	3.23e-13
M6PR	3253.5	0.66638	0.67803	9e-15	3.29e-13
AVL9	2014.7	-0.71058	-0.72525	9e-15	3.48e-13
TMPO	760.4	-1.04415	-1.08949	1.1e-14	3.91e-13
TBPL1	682.2	0.86322	0.88953	1.1e-14	3.91e-13
FOXL1	614.9	0.96948	1.00533	1.1e-14	4.01e-13
TRAF4	1511.2	0.84084	0.86483	1.2e-14	4.59e-13
TROAP	40	-2.38441	-3.44038	1.3e-14	4.8e-13
ARHGAP29	4002.8	0.72222	0.73719	1.4e-14	5.33e-13
MAPK1	5197.4	-0.69095	-0.7041	1.6e-14	6.04e-13
FUBP1	2352.7	-0.77978	-0.79905	2e-14	7.14e-13
SNRPA	667	-0.91467	-0.94538	2.1e-14	7.79e-13
MAP2K4	1511.6	0.76066	0.77886	2.3e-14	8.28e-13
SLC39A8	438.4	-1.10912	-1.1653	2.3e-14	8.43e-13
MAPRE3	506.9	1.00263	1.04555	2.4e-14	8.78e-13
TP53INP1	1457.3	0.84441	0.86912	2.5e-14	9.15e-13
EXTL3	3714.1	0.5834	0.59133	2.6e-14	9.44e-13
TNS2	2634.1	-0.77888	-0.79838	2.8e-14	9.92e-13
FEZ1	1617.8	0.70597	0.72028	2.8e-14	1.008e-12
RNF6	1845.4	-0.69003	-0.70364	2.9e-14	1.056e-12
DDX3Y	2608.5	0.93424	0.96873	3.8e-14	1.346e-12
PCNA	2228	0.8355	0.86007	4.4e-14	1.552e-12
CDK1	101.9	-2.05473	-2.6244	4.4e-14	1.58e-12
CREBL2	1190.2	0.7074	0.72183	4.5e-14	1.601e-12
NIF3L1	334.6	-1.11476	-1.17911	4.7e-14	1.665e-12
GRB2	1884.5	0.68212	0.69537	5.7e-14	2.014e-12
ASF1B	63.1	-1.99071	-2.47047	5.8e-14	2.039e-12
ACKR4	206.2	1.42142	1.57273	5.8e-14	2.039e-12
PLA2R1	1869.9	0.63949	0.65028	5.9e-14	2.066e-12
RAB2A	4433	0.63717	0.64789	5.9e-14	2.073e-12
ATP2B4	18638.9	0.79998	0.8216	6e-14	2.11e-12
AEN	3071.9	0.6387	0.64958	6.9e-14	2.4e-12
RPL10A	7785.4	-0.58514	-0.5935	7e-14	2.433e-12
SATB1	405.2	1.14494	1.2149	7.6e-14	2.645e-12
SELENON	6635	-0.57348	-0.58145	8.3e-14	2.856e-12
NSD2	1728.9	-0.64973	-0.66107	8.3e-14	2.862e-12
CNRIP1	1457.4	-0.70359	-0.71858	8.5e-14	2.909e-12
TPBG	5354.3	0.60919	0.61871	9.5e-14	3.253e-12
BLOC1S6	2275.3	0.80241	0.82469	9.5e-14	3.262e-12
GHDC	409	-1.11424	-1.18023	9.7e-14	3.309e-12
MARS	8109.4	-0.64879	-0.66034	9.8e-14	3.338e-12
PITPNA	3858.8	0.80993	0.83307	1.01e-13	3.418e-12
MOSPD1	1235.4	0.72286	0.73959	1.03e-13	3.492e-12
GPR137B	508	-0.98975	-1.03394	1.05e-13	3.548e-12
MCM4	552	-0.87417	-0.90136	1.05e-13	3.557e-12
ACBD3	2696.2	0.74639	0.7642	1.09e-13	3.661e-12
PLK2	1369.8	0.90798	0.94092	1.22e-13	4.1e-12
TPP1	14383.1	0.49987	0.50512	1.27e-13	4.26e-12
WASL	1453.6	-0.7785	-0.80018	1.34e-13	4.466e-12
EHD3	3895.2	0.81432	0.83761	1.39e-13	4.639e-12
CREB5	674.8	0.9135	0.94734	1.46e-13	4.85e-12
PBX3	1980.6	0.70994	0.72552	1.47e-13	4.878e-12
TBC1D23	2360.1	0.69314	0.70755	1.48e-13	4.891e-12
FAM103A1	153	-1.381	-1.51784	1.58e-13	5.234e-12
PRRX1	10317.2	0.57806	0.58633	1.62e-13	5.341e-12
PSRC1	161.1	-1.4409	-1.59356	1.64e-13	5.403e-12
GLT8D2	2048.6	-0.68306	-0.69712	1.69e-13	5.559e-12
ANKRD10	931.6	0.79907	0.82181	1.76e-13	5.752e-12
LINC01759	213.9	1.33796	1.46589	1.81e-13	5.922e-12
RP11-135F9.3	153.3	1.43005	1.584	1.85e-13	6.041e-12
PCTP	337.5	-1.13266	-1.20417	1.86e-13	6.041e-12
GID4	659.7	0.86106	0.89015	1.87e-13	6.072e-12
QSER1	1727.9	0.83427	0.85995	1.89e-13	6.109e-12
GNPTAB	3470	0.71767	0.73345	2.03e-13	6.571e-12
GTSE1	69.9	-1.82918	-2.14758	2.05e-13	6.604e-12
TLCD2	373	-1.0576	-1.11295	2.11e-13	6.787e-12
FANCE	157.5	-1.45785	-1.63236	2.27e-13	7.29e-12
DHX36	1914.6	-0.83009	-0.85631	2.34e-13	7.498e-12
SLC2A4RG	1448	-0.69381	-0.70869	2.36e-13	7.551e-12
PLXNC1	2050.2	0.73871	0.7569	2.57e-13	8.193e-12
ITGA2	7483	0.99788	1.04468	2.63e-13	8.371e-12
SAPCD2	31.7	-2.32888	-3.85212	2.81e-13	8.916e-12
MALT1	2085.5	0.87845	0.90929	2.82e-13	8.916e-12
FAM64A	63.4	-2.02543	-2.56929	2.82e-13	8.916e-12
HINT1	3457.4	-0.58805	-0.59693	2.92e-13	9.212e-12
PPFIBP1	3534.6	0.67989	0.69375	2.93e-13	9.223e-12
SAT1	1708.2	0.8429	0.8708	3.04e-13	9.543e-12
EID1	2678.9	0.96845	1.01067	3.47e-13	1.0882e-11
FCHSD2	2023	-0.66556	-0.67903	3.56e-13	1.113e-11
ASAP2	3056.8	0.95302	0.99311	3.56e-13	1.113e-11
KCNJ2	119.6	1.6905	1.98406	3.67e-13	1.1436e-11
ALDH1A1	14029.6	-0.69259	-0.70735	3.68e-13	1.1436e-11
GPC6	1578.8	0.85804	0.88622	3.77e-13	1.1689e-11
SAP30L	1432.9	0.69787	0.71306	3.93e-13	1.2162e-11
AFF4	6493.4	1.02335	1.07445	4.01e-13	1.2382e-11
ZBTB21	1009.7	0.86446	0.89357	4.27e-13	1.316e-11
NOX4	116.1	-1.72414	-2.06348	4.34e-13	1.3353e-11
BCL2L1	4017.8	0.65007	0.6624	4.44e-13	1.3622e-11
SNED1	3545.5	-0.60954	-0.61968	4.97e-13	1.5232e-11
STXBP6	537.2	1.32625	1.44869	5.27e-13	1.6112e-11
FGF7	1963.2	-0.73905	-0.75824	5.28e-13	1.6122e-11
STRADB	547.4	0.98568	1.03257	5.56e-13	1.6918e-11
ZNF217	1720.3	0.76072	0.78079	5.58e-13	1.6967e-11
SEMA3C	12612.5	0.70592	0.72185	5.6e-13	1.6995e-11
SUN1	3134.3	0.63111	0.64253	6.52e-13	1.9722e-11
LEPR	476.8	-0.92783	-0.96638	6.66e-13	2.0105e-11
CAV1	24016.6	0.58946	0.59869	6.8e-13	2.0497e-11
TNKS2	4483.6	0.80075	0.82484	7.55e-13	2.2719e-11
MEDAG	683.2	-0.85079	-0.8789	7.61e-13	2.2845e-11
DIRAS1	812.5	0.8247	0.85056	7.97e-13	2.386e-11
TRIAP1	1541.7	0.81315	0.83843	8.03e-13	2.4e-11
ATP6V1A	1669.1	0.83688	0.86435	8.37e-13	2.4968e-11
CHST3	4733.3	0.75176	0.77138	9.05e-13	2.6949e-11
WDR37	1148.9	0.75382	0.77379	9.31e-13	2.7651e-11
STK38L	982.5	-0.94102	-0.97964	9.5e-13	2.8156e-11
COLGALT1	7597.3	0.52948	0.53623	9.65e-13	2.8568e-11
IGF2R	18797.9	0.65979	0.67313	1.004e-12	2.9662e-11
TSC22D3	1048	-0.85343	-0.88202	1.007e-12	2.968e-11
RACGAP1	362.5	-0.96	-0.99798	1.051e-12	3.0911e-11
DCBLD2	6407.5	0.66895	0.68283	1.091e-12	3.2019e-11
ZCCHC10	283.4	-1.14509	-1.22797	1.124e-12	3.2935e-11
ABLIM3	2679.4	0.55549	0.56338	1.168e-12	3.4155e-11
TRAK2	4958.8	0.55392	0.56173	1.174e-12	3.4255e-11
TGFA	121	1.62523	1.87546	1.235e-12	3.5973e-11
IFI35	1236.4	-1.02819	-1.08612	1.371e-12	3.984e-11
KIAA1644	2453.4	0.7019	0.71822	1.453e-12	4.2157e-11
GRHPR	1805.5	-0.65053	-0.66378	1.504e-12	4.3512e-11
ITGA6	1106	0.94766	0.98945	1.506e-12	4.3512e-11
FAM212B	342.8	1.15391	1.23298	1.512e-12	4.3595e-11
EIF4EBP1	2265.6	-0.70559	-0.72245	1.53e-12	4.4042e-11
FAM114A1	5868.4	0.56065	0.56885	1.547e-12	4.4423e-11
PLPP2	134	1.73696	2.08763	1.561e-12	4.4734e-11
HHIP	190.6	1.47499	1.63816	1.567e-12	4.4837e-11
OMG	84.9	1.75829	2.17447	1.761e-12	5.0287e-11
SYNPO2	2950.1	-0.97017	-1.01497	1.796e-12	5.1194e-11
TMEM47	5073.7	0.84797	0.8778	1.864e-12	5.2968e-11
COL5A3	11165.1	0.89526	0.93003	1.866e-12	5.2968e-11
AURKA	193.3	-1.35573	-1.48399	2.02e-12	5.7227e-11
AKNA	1782.2	-0.86823	-0.90135	2.031e-12	5.7445e-11
NCKAP5	470.1	1.08305	1.14926	2.215e-12	6.2524e-11
PRKCA	4033.9	0.6293	0.64101	2.23e-12	6.2825e-11
TMEM65	730.9	-0.8196	-0.84826	2.333e-12	6.559e-11
LIG1	351.2	0.97598	1.0217	2.359e-12	6.6197e-11
LAMC1	81075.7	0.79706	0.82173	2.546e-12	7.1306e-11
XPR1	2052.6	0.73833	0.75815	2.563e-12	7.1654e-11
MORF4L2	10352.2	0.62908	0.64101	2.579e-12	7.1846e-11
FAR1	1500.8	-0.70975	-0.7274	2.58e-12	7.1846e-11
SLC26A11	482.8	-1.06012	-1.13225	2.632e-12	7.3158e-11
C2orf69	573.8	0.86704	0.89951	2.665e-12	7.3943e-11
RPL22	2825	0.54403	0.55178	3.033e-12	8.3977e-11
GLIS2	3037.1	0.64579	0.65868	3.15e-12	8.7072e-11
FKBP9	14610	0.50912	0.51541	3.286e-12	9.0657e-11
RFX7	1252.3	0.76022	0.78182	3.373e-12	9.2865e-11
RGMB	21007.3	0.62459	0.6364	3.435e-12	9.4391e-11
C16orf52	623.5	0.88438	0.9203	3.651e-12	1.00147e-10
RAB21	1401.3	0.66763	0.68227	3.738e-12	1.023e-10
TCTA	895.7	-0.74094	-0.75982	3.743e-12	1.023e-10
SCRIB	2671.7	0.73542	0.75514	3.793e-12	1.03462e-10
CHSY1	1734.5	0.79558	0.82096	4.36e-12	1.18715e-10
TRIP11	2222.3	0.61523	0.62661	4.522e-12	1.229e-10
CADM1	2601.1	0.92201	0.96192	4.588e-12	1.24454e-10
EIF1AX	1089.2	0.76458	0.78701	4.811e-12	1.30267e-10
PPP1CC	2916.9	0.59514	0.60544	4.834e-12	1.30648e-10
GOLM1	2385.4	-0.69089	-0.70775	5.383e-12	1.45201e-10
ZBTB41	594.1	0.92551	0.967	5.452e-12	1.46816e-10
RGAG4	473.5	0.91621	0.95662	6.098e-12	1.63899e-10
FOXO3	1723.4	0.83959	0.87011	6.139e-12	1.64701e-10
TPI1	5613.5	-0.48902	-0.49478	6.192e-12	1.65821e-10
RHOQ	3440.9	0.68413	0.70032	6.439e-12	1.7211e-10
CYP1B1	5996.9	-0.70194	-0.71929	6.459e-12	1.72343e-10
VOPP1	820.6	0.74407	0.76472	6.498e-12	1.73065e-10
KLF13	4613.7	0.50637	0.5127	6.551e-12	1.74145e-10
EEA1	3156.1	0.70854	0.72642	6.764e-12	1.79482e-10
RTN4	25915.4	0.53436	0.54188	6.87e-12	1.8197e-10
APC	2001.5	0.70666	0.72444	7.003e-12	1.85164e-10
ABCA1	1096.2	1.01862	1.07489	7.022e-12	1.85321e-10
TCP11L1	1004.3	0.74146	0.76202	7.171e-12	1.8891e-10
TFRC	9763	0.57144	0.5807	7.584e-12	1.99456e-10
LRP12	1261.7	0.69549	0.71269	7.667e-12	2.01266e-10
OCRL	1874	0.61054	0.62197	8.132e-12	2.13101e-10
ABCA2	2162.8	0.56843	0.57756	8.161e-12	2.13479e-10
PODNL1	612.8	-0.84982	-0.88089	8.205e-12	2.14239e-10
CENPU	44.6	-1.99168	-2.70264	1.0012e-11	2.60964e-10
NONO	5842.1	-0.60517	-0.61651	1.0246e-11	2.66577e-10
COX20	574.4	-0.86968	-0.90401	1.0668e-11	2.77054e-10
EI24	5817	0.53408	0.54176	1.0815e-11	2.80388e-10
ANTXR2	4211.1	0.8211	0.8503	1.0895e-11	2.81962e-10
XG	147.6	1.34741	1.49886	1.0942e-11	2.82679e-10
SLC25A3	13487.3	-0.50432	-0.51073	1.1273e-11	2.9072e-10
CLN5	934.3	0.70793	0.72633	1.1667e-11	3.00345e-10
SFRP4	100.6	1.51345	1.75486	1.1777e-11	3.02648e-10
PTPA	4274.3	-0.53133	-0.53894	1.1798e-11	3.02665e-10
CHEK1	353.5	-1.04482	-1.10688	1.2031e-11	3.08083e-10
NACC2	1720.4	0.65899	0.67363	1.2093e-11	3.09141e-10
MTX3	615.6	0.88726	0.92514	1.2252e-11	3.12659e-10
GBP2	598.6	-1.09523	-1.17174	1.2805e-11	3.26206e-10
HSPB1	9531.9	-0.59007	-0.60053	1.2897e-11	3.27978e-10
TNFRSF10A	152.1	1.38754	1.57577	1.3464e-11	3.418e-10
KIF11	192.7	-1.26705	-1.38115	1.4127e-11	3.58012e-10
HIVEP2	3071.3	0.75767	0.78045	1.4198e-11	3.59191e-10
PTPRU	3089.6	0.59863	0.60968	1.4446e-11	3.64844e-10
UBL4B	895.6	-0.70026	-0.71854	1.4641e-11	3.69136e-10
PPP4R3A	2455.5	0.61714	0.62932	1.5558e-11	3.91581e-10
GUCY1A3	161.6	-1.46702	-1.71416	1.5828e-11	3.97678e-10
KPNA2	1888.3	-0.75957	-0.78266	1.6271e-11	4.08104e-10
MSANTD3	2557.7	0.64163	0.65545	1.7486e-11	4.37832e-10
RASSF3	1525.2	0.6962	0.71406	1.7581e-11	4.39469e-10
RAP1GDS1	2137.3	-0.86004	-0.89524	1.7937e-11	4.4759e-10
INPP5D	51.5	2.03914	3.05054	1.8595e-11	4.63238e-10
TGFBRAP1	1740.4	0.61089	0.62293	1.9633e-11	4.88258e-10
NUF2	39.3	-2.02748	-2.86403	1.9685e-11	4.88733e-10
RPL7L1	2272.1	0.60735	0.61914	1.993e-11	4.9396e-10
MAPK13	656.6	0.75938	0.78296	2.0246e-11	5.00954e-10
EREG	147.1	1.4244	1.62685	2.1265e-11	5.25276e-10
CEBPD	1295.7	-1.55847	-1.83282	2.2973e-11	5.66001e-10
ACVR2A	1095.4	-0.71663	-0.73562	2.2991e-11	5.66001e-10
NDUFA5	598.5	0.83154	0.86265	2.3252e-11	5.71463e-10
PDHB	2332.9	-0.59239	-0.60328	2.399e-11	5.88614e-10
PKMYT1	34.9	-2.05072	-2.96748	2.4452e-11	5.98952e-10
LMBR1	1125.4	0.7338	0.75481	2.4632e-11	6.02354e-10
TAF13	1383.6	0.85142	0.88535	2.4875e-11	6.07274e-10
MAFF	1292.5	0.80132	0.8295	2.509e-11	6.11509e-10
KLHL20	1063.1	-0.66159	-0.67723	2.5433e-11	6.18844e-10
ZNF79	427.5	0.87704	0.91433	2.8545e-11	6.93422e-10
TMEM131	3939.2	0.54783	0.55653	2.9606e-11	7.17999e-10
GUCY1B3	332.6	-1.04555	-1.12037	3.0223e-11	7.31755e-10
SYNJ2BP	843.9	-1.00319	-1.06404	3.0383e-11	7.34406e-10
FANCI	216.9	-1.14829	-1.23624	3.1083e-11	7.50083e-10
MAPK11	426.4	0.84814	0.88107	3.2255e-11	7.77087e-10
MARCKSL1	880.2	-0.76653	-0.79082	3.3047e-11	7.9487e-10
PBDC1	794.2	-0.72601	-0.74726	3.4368e-11	8.25271e-10
KIF22	242.8	-1.10516	-1.18165	3.5271e-11	8.45587e-10
TNXB	9314.5	0.81829	0.84871	3.6219e-11	8.66891e-10
TAB3	1007.5	0.72893	0.75	3.6395e-11	8.69676e-10
IGIP	203.7	1.235	1.35445	3.8034e-11	9.07372e-10
ARIH1	3048.6	0.52702	0.53487	3.8165e-11	9.09015e-10
ACTB	98717.1	-0.4931	-0.49946	4.0233e-11	9.56703e-10
PAM	17366.7	0.55797	0.56729	4.0432e-11	9.59884e-10
LYRM2	916.1	-0.74169	-0.76592	4.2362e-11	1.00409e-09
NCAPH	39.8	-1.9897	-2.71319	4.3133e-11	1.02069e-09
ATL1	342.6	0.88425	0.92151	4.6815e-11	1.10604e-09
POLQ	41.3	-1.94605	-2.67083	4.6972e-11	1.10797e-09
LYSMD1	214.4	-1.18152	-1.28337	4.7167e-11	1.11077e-09
STARD4	2090.4	-0.74	-0.76306	4.7956e-11	1.12754e-09
NLRP1	1888.3	0.60725	0.61935	4.8687e-11	1.1429e-09
PLK4	58.7	-1.73408	-2.14427	4.9136e-11	1.15159e-09
IFT57	2109	0.62819	0.64185	5.1425e-11	1.20331e-09
MAN2B2	4635.2	0.47909	0.485	5.1976e-11	1.21427e-09
MORF4L1	4977	0.49279	0.49924	5.3316e-11	1.24359e-09
KCNK2	3135	0.75936	0.78375	5.6052e-11	1.30533e-09
CCDC90B	1595.6	0.67131	0.68808	5.9816e-11	1.39078e-09
USP6NL	638.5	0.76899	0.79545	6.0352e-11	1.401e-09
RIN2	1796.4	0.7561	0.78043	6.1555e-11	1.42667e-09
MFGE8	17078.2	0.50368	0.51061	6.224e-11	1.44026e-09
DENND5B	587.4	0.83309	0.86667	6.3479e-11	1.46663e-09
CLTCL1	415.7	-0.93225	-0.97857	6.4096e-11	1.47855e-09
EMC10	4622.2	0.52157	0.52931	6.439e-11	1.48299e-09
ENO1	24201	-0.43825	-0.44281	6.487e-11	1.49171e-09
CAB39	3371.3	0.63389	0.64801	6.5965e-11	1.5145e-09
SLC20A2	1986.9	-0.86818	-0.90569	6.8156e-11	1.56132e-09
MCAM	442.7	-1.18424	-1.28344	6.8217e-11	1.56132e-09
SNAI1	494.1	-0.90795	-0.95056	6.911e-11	1.57929e-09
ZFHX3	1389.9	0.87741	0.91679	7.1219e-11	1.62495e-09
ORAI2	3115.5	0.56927	0.57944	7.197e-11	1.63954e-09
DPY19L1	1562.8	0.68585	0.70394	7.4407e-11	1.69241e-09
CRIM1	17763.2	0.7342	0.7565	7.4953e-11	1.70218e-09
CDV3	7283.4	0.57256	0.58296	7.5367e-11	1.70894e-09
KCNS3	418.9	0.88247	0.92345	7.726e-11	1.74915e-09
TBK1	1109.2	0.7094	0.72948	8.3607e-11	1.88993e-09
RP11-54O7.3	1331.9	-0.87445	-0.91406	8.6331e-11	1.9485e-09
NOB1	1474.9	-0.58217	-0.59352	8.9967e-11	2.02744e-09
COMP	5093.7	-0.65889	-0.67501	9.2463e-11	2.08049e-09
CDCA5	100.9	-1.44486	-1.6397	9.5446e-11	2.14431e-09
TRAFD1	1652.4	-1.03844	-1.11064	9.7275e-11	2.18206e-09
ARL6IP6	329	-0.94138	-0.99226	9.9948e-11	2.2386e-09
ALDH1L2	8906.9	-0.66534	-0.68212	1.0407e-10	2.32736e-09
CHMP2B	2042.7	0.65308	0.66899	1.05388e-10	2.35323e-09
RBM24	158.3	1.15234	1.23819	1.07807e-10	2.40359e-09
ENTPD4	2650.2	0.55726	0.56695	1.08359e-10	2.41221e-09
PLCL2	470.6	0.90661	0.95139	1.11667e-10	2.4821e-09
GLTP	1883.7	0.56091	0.57082	1.12399e-10	2.49457e-09
CYLD	2677.7	0.72231	0.74447	1.18041e-10	2.61583e-09
NTN4	4771.7	0.81868	0.85093	1.18737e-10	2.62729e-09
PHPT1	1979.9	0.5881	0.59964	1.21887e-10	2.69291e-09
DCAF1	1053.7	0.68814	0.70701	1.22385e-10	2.69984e-09
IDH3B	1412.6	-0.57606	-0.58701	1.28462e-10	2.82963e-09
APAF1	1055.3	0.73963	0.7628	1.30279e-10	2.86536e-09
HMGA2	6489.9	0.65756	0.67378	1.30509e-10	2.86611e-09
DUSP3	2665.1	0.69231	0.71143	1.32688e-10	2.9096e-09
NEK2	26.6	-2.05146	-3.21884	1.41881e-10	3.10654e-09
SPOCK1	23830.8	0.71459	0.73588	1.44195e-10	3.1525e-09
APBB1	1561.8	0.59667	0.60886	1.44588e-10	3.15638e-09
WHRN	129.3	1.32846	1.48605	1.47565e-10	3.21657e-09
MATN3	66.3	-1.6997	-2.10256	1.48151e-10	3.22454e-09
DOCK1	5652.1	0.46023	0.46571	1.5361e-10	3.3384e-09
SKP2	704.1	-1.01278	-1.07782	1.54233e-10	3.34697e-09
TGFBR1	2234.1	-0.65729	-0.67384	1.56655e-10	3.3945e-09
RGCC	208.7	1.10779	1.19419	1.56947e-10	3.39581e-09
LHFPL2	3170.7	0.69518	0.715	1.61429e-10	3.48763e-09
ZNF880	490.1	0.80346	0.83438	1.61714e-10	3.48865e-09
UFM1	3094	0.71378	0.73522	1.64211e-10	3.5373e-09
C19orf12	1334.1	0.6847	0.7038	1.65156e-10	3.55243e-09
STK17A	2867.6	0.60983	0.62289	1.66821e-10	3.58298e-09
RIC1	4325.5	0.69506	0.71476	1.74996e-10	3.75306e-09
NFASC	3836	0.65176	0.66782	1.78397e-10	3.8204e-09
FBXW7	1120.6	0.66298	0.68014	1.90456e-10	4.07269e-09
PHLDA3	6289.9	0.54675	0.55621	1.93857e-10	4.13939e-09
IDE	1440.3	0.64539	0.66121	1.945e-10	4.14707e-09
VEGFB	2277.7	0.59581	0.60815	2.0769e-10	4.42187e-09
TCF4	2980.8	0.8526	0.89063	2.12467e-10	4.517e-09
TYMSOS	39.2	1.903	2.67895	2.23273e-10	4.73985e-09
NUPR1	5803.7	-0.55747	-0.56755	2.23678e-10	4.74157e-09
PTMA	2139.2	-0.54833	-0.55794	2.24226e-10	4.74634e-09
PSTPIP2	424.8	0.9229	0.97179	2.33359e-10	4.93253e-09
TM4SF1	89.6	-1.47757	-1.71797	2.40113e-10	5.06797e-09
RAP2B	1600.8	0.58417	0.59598	2.44262e-10	5.14812e-09
PTTG1	206.2	-1.28732	-1.43021	2.5071e-10	5.27644e-09
KRT17	197.1	1.3094	1.48401	2.54055e-10	5.33916e-09
CENPE	187.4	-1.22817	-1.34883	2.61033e-10	5.47795e-09
CDC42EP3	9444.7	0.77283	0.8009	2.81346e-10	5.8958e-09
MPP5	1043.9	-0.61885	-0.63253	2.81787e-10	5.8966e-09
MTURN	584.9	0.73876	0.76299	2.84192e-10	5.93844e-09
BAX	3456.2	0.5737	0.58488	2.90284e-10	6.0571e-09
DPYD	2054.4	-0.77706	-0.80592	2.99371e-10	6.23783e-09
FAM217B	224.1	-1.09802	-1.19519	3.01355e-10	6.27023e-09
NBL1	1553.6	0.56175	0.57219	3.11382e-10	6.46969e-09
CTSF	1243.9	0.59461	0.60696	3.19957e-10	6.63843e-09
DNAJB4	1383.4	0.63055	0.64542	3.25746e-10	6.74899e-09
SMC1A	2096.2	0.57935	0.59099	3.38839e-10	7.01033e-09
CPNE5	59.6	-1.80342	-2.59876	3.46996e-10	7.16012e-09
THSD4	3621.9	0.57892	0.59034	3.47057e-10	7.16012e-09
SYT14	322.7	1.03416	1.10627	3.53422e-10	7.2584e-09
SERPINF1	6310.9	-0.52646	-0.53518	3.53447e-10	7.2584e-09
SKA3	33.9	-1.90415	-2.67344	3.5407e-10	7.2584e-09
SLC7A7	173	-1.16254	-1.28199	3.54129e-10	7.2584e-09
PTPN9	2301	-0.50536	-0.51312	3.54298e-10	7.2584e-09
TNFAIP6	1021.4	-0.87839	-0.92389	3.56521e-10	7.29374e-09
SEMA3A	2990.2	0.75482	0.78135	3.57566e-10	7.2991e-09
MASP1	13942.4	0.53628	0.54543	3.5778e-10	7.2991e-09
ZBTB38	9030.6	0.56984	0.58089	3.63136e-10	7.39808e-09
LIMA1	7988.2	-0.69487	-0.71546	3.6535e-10	7.43285e-09
BAALC	877.3	0.7639	0.79108	3.66015e-10	7.43604e-09
CASK	1760.1	0.68521	0.70494	3.75037e-10	7.60879e-09
CES2	2459.8	0.52037	0.52878	3.75877e-10	7.61529e-09
VPS41	2454.4	0.5557	0.56598	3.83683e-10	7.7627e-09
CCND1	19631	0.79956	0.83151	3.85485e-10	7.78839e-09
TGFB1I1	4243.9	-0.57591	-0.5873	3.88452e-10	7.83753e-09
F2R	2773	0.56028	0.57088	4.02884e-10	8.11752e-09
CLSPN	47.9	-1.80274	-2.35693	4.15151e-10	8.3532e-09
MTHFD2	7487.7	-0.63271	-0.64822	4.25109e-10	8.54184e-09
TPRG1L	3258.2	0.54052	0.54998	4.34436e-10	8.71728e-09
MICALL1	4353.1	0.56246	0.5732	4.38013e-10	8.77703e-09
SLC36A4	496.7	0.7883	0.81938	4.46803e-10	8.94094e-09
CEP170B	2807.8	0.52969	0.53862	4.64324e-10	9.27881e-09
SH3YL1	403.5	0.85044	0.88909	4.64954e-10	9.27881e-09
CDT1	50.1	-1.71181	-2.14478	4.90411e-10	9.77352e-09
MAPK8IP1	343.4	0.92363	0.97437	5.19766e-10	1.03445e-08
COBLL1	1257.8	0.80818	0.84248	5.20557e-10	1.03462e-08
EFNB1	737.3	0.78338	0.81364	5.24623e-10	1.04128e-08
SPTBN1	5520.3	0.62056	0.63519	5.27117e-10	1.04482e-08
ATAD2	634	-0.75872	-0.78625	5.3807e-10	1.06509e-08
ARPP19	2923.6	0.57203	0.58342	5.45397e-10	1.07814e-08
MAN1A1	3191	0.51964	0.52813	5.51065e-10	1.08787e-08
SMPD1	4717.3	0.55802	0.56862	5.63406e-10	1.11074e-08
PLSCR4	1243.3	0.69763	0.7188	5.72256e-10	1.12667e-08
GADD45B	1617.5	-0.866	-0.90664	5.90428e-10	1.16088e-08
TNFAIP8	720.4	0.97738	1.041	5.91358e-10	1.16115e-08
MTHFD1	1451.5	-0.56792	-0.57899	6.05558e-10	1.18744e-08
MMP11	438.8	0.99068	1.05879	6.07857e-10	1.19036e-08
CLOCK	2361.3	0.60911	0.62305	6.21771e-10	1.21598e-08
GMFB	1890.5	0.75463	0.78155	6.84063e-10	1.33602e-08
GNB1	16539.5	0.51623	0.52468	6.86166e-10	1.33834e-08
RASD2	94.6	-1.46976	-1.71941	7.10755e-10	1.38446e-08
AGAP2-AS1	618.3	0.73301	0.75778	7.12139e-10	1.38531e-08
PGM3	5392.3	0.78894	0.82056	7.24123e-10	1.40554e-08
RNF24	2695.8	0.70135	0.72329	7.24454e-10	1.40554e-08
APP	64169.9	0.55369	0.56419	7.33395e-10	1.42086e-08
TMEM87B	4522.7	0.52477	0.53366	7.34294e-10	1.42086e-08
PLEKHG1	193.5	1.14793	1.26158	7.38508e-10	1.42713e-08
POFUT2	2329.5	0.55863	0.56933	7.49216e-10	1.44592e-08
SH3BP4	4300.3	0.62326	0.63825	7.51295e-10	1.44802e-08
TM9SF3	8904.6	0.54514	0.55518	7.57275e-10	1.45763e-08
THUMPD1	997.2	0.76771	0.79707	7.98783e-10	1.53551e-08
PLCXD3	143.8	1.32216	1.50044	8.03711e-10	1.54296e-08
COG6	1686.1	0.564	0.57501	8.05456e-10	1.54428e-08
TMED4	1770.8	-0.52895	-0.53812	8.08949e-10	1.54895e-08
MAP4K3	1600.4	0.69099	0.71215	8.4243e-10	1.61096e-08
TMEM198	141.1	1.31766	1.49361	8.52935e-10	1.62726e-08
PDLIM7	8562.7	-0.54831	-0.55854	8.53178e-10	1.62726e-08
IGDCC4	846.8	0.67246	0.69206	8.55917e-10	1.63036e-08
B3GALT1	70.8	1.70018	2.19561	8.73161e-10	1.66105e-08
MMP1	1655.4	0.90867	0.95905	8.74694e-10	1.66181e-08
TIMELESS	404.7	-0.80305	-0.8362	9.00392e-10	1.70841e-08
PROSC	1285	0.55308	0.56364	9.01915e-10	1.70909e-08
ROBO2	483.8	0.78745	0.81833	9.10749e-10	1.72267e-08
MCM5	286.7	-1.07747	-1.15796	9.11434e-10	1.72267e-08
WLS	3618.5	0.47165	0.47817	9.26678e-10	1.74922e-08
TMEM200A	2840.2	0.52865	0.53785	9.28222e-10	1.74988e-08
C4orf32	225.4	-1.19151	-1.32843	9.92058e-10	1.86782e-08
TOMM40L	547.1	-0.7211	-0.74515	1.00243e-09	1.88493e-08
PTPRQ	180.2	-1.08851	-1.18155	1.01087e-09	1.89837e-08
WDR7	647.9	-0.7325	-0.75821	1.04891e-09	1.96728e-08
APOBEC3C	2894.6	0.6227	0.63807	1.08533e-09	2.03297e-08
THBS2	64359.8	0.72281	0.7474	1.10618e-09	2.06939e-08
CDC27	3439.1	0.69819	0.72032	1.11499e-09	2.08321e-08
TXNIP	14722.5	-0.653	-0.67083	1.12006e-09	2.09001e-08
SPAG9	5189.4	0.75422	0.78252	1.22387e-09	2.28082e-08
PNRC2	1062.2	0.61898	0.63438	1.25686e-09	2.33933e-08
PDE1C	2109.5	0.58128	0.59394	1.27694e-09	2.37368e-08
ATP5B	15092.5	-0.45721	-0.46324	1.27892e-09	2.37435e-08
HSDL1	546.9	-0.70885	-0.7333	1.28202e-09	2.37709e-08
DOK5	547.9	0.90013	0.95105	1.36239e-09	2.52292e-08
SERPINB2	2721.3	1.57167	1.95007	1.3918e-09	2.57413e-08
MMP16	1047.2	0.81243	0.84812	1.41205e-09	2.60828e-08
RAP2A	1115.8	0.74028	0.76719	1.41879e-09	2.61743e-08
EOGT	1147.8	0.76383	0.79319	1.55233e-09	2.86019e-08
PIGA	224.9	-1.18209	-1.31293	1.63017e-09	2.99985e-08
CDH6	1590.3	0.57342	0.58543	1.7045e-09	3.1327e-08
SLC30A5	2759.9	0.53959	0.54977	1.71535e-09	3.14868e-08
IL11	1343.5	-0.61392	-0.62889	1.72981e-09	3.17125e-08
GALNT11	785.7	-0.7289	-0.75414	1.74166e-09	3.18897e-08
RNPEPL1	1810.6	0.54841	0.55906	1.91535e-09	3.50262e-08
COL13A1	423.9	0.81694	0.85492	1.94388e-09	3.55038e-08
RRAD	56.1	1.60492	2.08368	1.98907e-09	3.62838e-08
YIPF5	5513.6	0.50426	0.51255	2.01722e-09	3.67515e-08
PHF10	655.4	-0.74929	-0.77899	2.0355e-09	3.70385e-08
SUSD6	1617.4	0.59222	0.60599	2.07336e-09	3.76806e-08
NECTIN3	1858.2	0.64993	0.66816	2.11235e-09	3.83416e-08
SNCAIP	338.2	0.93968	0.99764	2.13013e-09	3.86165e-08
SEL1L3	2280.3	-0.73124	-0.75777	2.24795e-09	4.07021e-08
KCNK6	1538.4	0.71999	0.74485	2.26462e-09	4.09532e-08
HSD17B11	317.7	-0.91836	-0.97458	2.35353e-09	4.25087e-08
SELENOP	1064.8	-0.70005	-0.72418	2.36047e-09	4.25815e-08
MCM10	21.4	-1.93082	-3.21122	2.37734e-09	4.2833e-08
ZNF697	813.5	0.64658	0.66479	2.41103e-09	4.33866e-08
CDKN3	58.7	-1.63987	-2.06907	2.52046e-09	4.53002e-08
PRSS3	209.4	1.18802	1.31675	2.58443e-09	4.63931e-08
PANK1	268.9	0.96945	1.03685	2.61834e-09	4.69443e-08
OXTR	4319.9	-0.46271	-0.46905	2.66441e-09	4.77119e-08
TAPBP	4553.6	0.58677	0.60024	2.69652e-09	4.82279e-08
SHMT2	8077	-0.44161	-0.44724	2.71828e-09	4.85537e-08
RAB23	2835.3	-0.57765	-0.59071	2.72137e-09	4.85537e-08
FGFR1	15185.1	0.51956	0.52886	2.73721e-09	4.8777e-08
KIAA1549L	3752.3	0.62072	0.63668	2.78099e-09	4.9497e-08
ARFGAP2	2249.2	-0.48349	-0.49094	2.86113e-09	5.08614e-08
RAB1A	7802	0.55742	0.56899	2.88536e-09	5.123e-08
AKAP9	1542.5	0.65603	0.67518	3.05796e-09	5.42288e-08
MIB2	1125.7	0.7669	0.79814	3.07033e-09	5.43824e-08
TENM2	552.4	-0.85715	-0.90037	3.08269e-09	5.45354e-08
THAP9-AS1	504.8	0.74424	0.77335	3.1198e-09	5.51253e-08
CEP104	1155.9	0.58325	0.59669	3.23541e-09	5.70992e-08
WBP1L	3230.4	0.47057	0.47747	3.27943e-09	5.78064e-08
ERCC6L	18	-1.94417	-3.59548	3.36479e-09	5.92397e-08
PHLDB3	337.7	0.94853	1.01138	3.38618e-09	5.95448e-08
FBXW5	4027.6	0.50245	0.51095	3.39113e-09	5.95603e-08
MEGF8	5180.6	0.47011	0.47703	3.47699e-09	6.09951e-08
PLBD2	7722.7	0.44353	0.44928	3.5107e-09	6.15128e-08
BRIP1	242.3	-1.45245	-1.76274	3.56531e-09	6.23951e-08
FRMD5	94.8	1.4337	1.70641	3.58877e-09	6.26073e-08
ADCY7	902.1	-0.69021	-0.71336	3.58938e-09	6.26073e-08
SLC23A2	939.4	0.64063	0.6589	3.59026e-09	6.26073e-08
PLA2G4C	75.8	1.443	1.71337	3.59504e-09	6.26161e-08
ATP6AP2	6481.4	0.44778	0.45375	3.60223e-09	6.26668e-08
XPOT	10097.7	0.42626	0.43141	3.62408e-09	6.29721e-08
CCNK	2924.3	0.62385	0.64048	3.67596e-09	6.37672e-08
NBEA	886.3	0.62107	0.63751	3.67854e-09	6.37672e-08
ARFGEF2	3122.4	0.5533	0.56477	3.75516e-09	6.50184e-08
RELL2	252.2	1.07099	1.16354	3.80026e-09	6.57217e-08
MCM2	390.3	-0.83507	-0.87653	3.81908e-09	6.59692e-08
DGKI	2769.3	0.80585	0.84323	3.85204e-09	6.64602e-08
PRKCE	696.5	0.66252	0.68317	3.87683e-09	6.68092e-08
LINC00963	1438.7	0.57518	0.58821	3.91356e-09	6.73566e-08
AJAP1	162.8	1.10033	1.20359	3.91779e-09	6.73566e-08
KRT80	73.4	-1.40781	-1.63138	3.94951e-09	6.78222e-08
TMEM177	147.6	-1.15938	-1.28384	4.09966e-09	7.03183e-08
ELP2	2824.2	0.50714	0.51595	4.18757e-09	7.17422e-08
PAMR1	6289.6	0.45566	0.46204	4.21063e-09	7.2053e-08
LCAT	410.6	0.80039	0.83658	4.23104e-09	7.23177e-08
SAMD4B	3958.3	0.53886	0.54952	4.27087e-09	7.29135e-08
TMEM248	4531.6	0.50944	0.51844	4.53753e-09	7.73757e-08
PTEN	2309.1	0.57893	0.59234	4.64759e-09	7.91603e-08
JAZF1	1242.5	-0.69552	-0.71999	4.72486e-09	8.03829e-08
ECT2	601.4	-0.72191	-0.74994	4.75961e-09	8.08803e-08
CSRP1	11055.1	-0.61369	-0.62966	4.94367e-09	8.39107e-08
ANKRD13B	245.9	0.90599	0.96061	5.12959e-09	8.69655e-08
KIF15	53.1	-1.58293	-1.97196	5.17381e-09	8.76138e-08
SERINC3	8677.6	0.44761	0.45375	5.5043e-09	9.31028e-08
DACT1	876	-0.7499	-0.77962	5.52452e-09	9.3337e-08
HOOK3	1920.8	0.76707	0.79954	5.65727e-09	9.54071e-08
PAX8-AS1	786.8	0.66397	0.68416	5.66007e-09	9.54071e-08
PTGIS	10358.3	0.63016	0.6477	5.76045e-09	9.69875e-08
FANCD2	60.2	-1.52414	-1.85917	5.86481e-09	9.86312e-08
FMR1	1089.4	0.85245	0.89978	6.308e-09	1.05963e-07
NBN	1975.1	-0.65101	-0.67118	6.49732e-09	1.09018e-07
MCU	997.2	-0.65549	-0.67522	6.6336e-09	1.11177e-07
TCF12	3826	-0.49568	-0.50418	6.81704e-09	1.14121e-07
GDE1	3745.4	0.42764	0.43303	6.8347e-09	1.14286e-07
RAPH1	2855.3	0.64731	0.66659	7.06842e-09	1.1806e-07
ESPL1	99.1	-1.26223	-1.42312	7.13565e-09	1.19047e-07
TMEM106B	1164	0.69649	0.72114	7.3185e-09	1.21958e-07
KNL1	75.6	-1.55278	-1.91089	7.35448e-09	1.22419e-07
MCL1	14029.7	0.5939	0.60889	7.43018e-09	1.23538e-07
TMEM176B	309.8	-0.9374	-1.00177	7.61017e-09	1.26387e-07
ANPEP	29005.1	0.4624	0.46931	8.08925e-09	1.34192e-07
GINS2	32.5	-1.77109	-2.56187	8.17274e-09	1.35423e-07
NDEL1	3243.7	0.55108	0.56296	8.2833e-09	1.371e-07
PPTC7	773.6	0.66517	0.68662	8.32309e-09	1.37603e-07
BIRC3	438.6	1.04525	1.14006	8.41839e-09	1.38932e-07
XPO4	1079.2	0.57784	0.59161	8.42242e-09	1.38932e-07
MGARP	204	0.97204	1.04344	8.66688e-09	1.42804e-07
BTBD10	1879	0.48336	0.49135	8.87465e-09	1.46047e-07
CDK5RAP2	1980.2	-0.64371	-0.66312	8.88368e-09	1.46047e-07
CDCA7	24.9	-1.8743	-3.26602	8.975e-09	1.47383e-07
GNG12	11186.6	0.62091	0.63826	9.1291e-09	1.49746e-07
PTMS	6392.8	-0.46366	-0.47067	9.4153e-09	1.54268e-07
SUGCT	240.5	0.92448	0.9863	9.666e-09	1.58198e-07
HGSNAT	3808.9	0.44323	0.44937	9.99543e-09	1.63407e-07
MEX3C	2572.6	0.50348	0.51267	1.00274e-08	1.63747e-07
HIPK3	3282	-0.71137	-0.73841	1.02222e-08	1.66743e-07
FARP1	7735.6	0.54895	0.56085	1.0989e-08	1.79051e-07
DNAJC27	265.6	-0.9704	-1.0468	1.11974e-08	1.82243e-07
DDIT3	2937.8	-0.54379	-0.55588	1.12418e-08	1.82763e-07
ANKRD29	625.5	0.65626	0.6771	1.13714e-08	1.84666e-07
GRN	20411.1	0.38801	0.39216	1.19384e-08	1.93658e-07
GOLIM4	5173.6	0.64244	0.66197	1.21029e-08	1.9611e-07
MYLK	22687.4	-0.56405	-0.57712	1.21998e-08	1.97282e-07
DGKA	1422.8	0.56217	0.57504	1.22022e-08	1.97282e-07
NAB1	769.6	0.69681	0.72179	1.22479e-08	1.97803e-07
AGAP1	812.5	0.71092	0.7377	1.23797e-08	1.99711e-07
PEX11B	658.8	-0.6779	-0.70154	1.25837e-08	2.02779e-07
RAB8B	1486.5	-0.70566	-0.7329	1.27463e-08	2.05173e-07
EXOSC3	414.5	-0.77059	-0.80608	1.2809e-08	2.05956e-07
TNKS	1753.8	0.54113	0.55256	1.30392e-08	2.09428e-07
RALGPS2	2212.2	0.70958	0.73639	1.31752e-08	2.1138e-07
CLDN1	92.7	1.39412	1.68775	1.31926e-08	2.11428e-07
NEMP2	232.9	-1.04815	-1.14504	1.38812e-08	2.2222e-07
UNG	439.8	-0.71612	-0.74381	1.39134e-08	2.22493e-07
TM9SF4	3950.2	0.40833	0.41323	1.40067e-08	2.23741e-07
DDRGK1	1000.7	-0.55751	-0.57076	1.41453e-08	2.25709e-07
DMKN	856.7	-0.62494	-0.64359	1.41824e-08	2.26054e-07
ZNF106	4174	0.59344	0.60887	1.43708e-08	2.28808e-07
PUM2	3119.6	0.49395	0.50275	1.4391e-08	2.28881e-07
CPS1	234.9	-1.02738	-1.11571	1.44665e-08	2.29832e-07
CAMK2N1	3457.1	0.60482	0.6214	1.4488e-08	2.29854e-07
TMEM217	115.9	1.19668	1.3696	1.44992e-08	2.29854e-07
FAT1	18334.9	0.67473	0.6978	1.48887e-08	2.35773e-07
RNASEH2A	128.7	-1.10924	-1.21918	1.4932e-08	2.36203e-07
SLC7A1	5650.5	-0.49867	-0.50751	1.49941e-08	2.3693e-07
PERP	2354.8	-0.4917	-0.50071	1.53324e-08	2.42015e-07
CSRP2	1543.7	-0.76449	-0.79925	1.54894e-08	2.4423e-07
ARHGAP35	4615.2	0.48321	0.49146	1.58298e-08	2.49328e-07
MXI1	663.3	0.66704	0.68964	1.58654e-08	2.4962e-07
TTK	48.2	-1.59584	-2.02364	1.59703e-08	2.51001e-07
CDKN1C	97.1	-1.28073	-1.47584	1.60737e-08	2.52356e-07
SOCS3	1582.3	-0.81188	-0.8548	1.64849e-08	2.58534e-07
PI16	113.5	-1.29523	-1.47965	1.66633e-08	2.61052e-07
GOT1	2430.5	-0.56105	-0.5745	1.67023e-08	2.61384e-07
PRPF38A	984.4	-0.55673	-0.56909	1.68946e-08	2.64111e-07
CNTRL	411	-0.75075	-0.78416	1.69412e-08	2.64557e-07
RPS9	9570.8	-0.40307	-0.40787	1.72825e-08	2.696e-07
KPNA3	2519.8	0.58983	0.60528	1.75151e-08	2.72938e-07
FZD6	2010.5	-0.54566	-0.55787	1.78834e-08	2.78178e-07
WDR26	6449.5	0.46609	0.47355	1.78894e-08	2.78178e-07
PIP5K1A	2571.9	-0.49069	-0.49951	1.79892e-08	2.79433e-07
SMAD1	511.9	-0.74069	-0.77392	1.81949e-08	2.8233e-07
STX16	1649.4	-0.52477	-0.53617	1.85325e-08	2.87263e-07
CTSA	18178.5	0.39854	0.40317	1.87032e-08	2.89603e-07
SLC25A30	365.6	-1.00174	-1.09573	1.90359e-08	2.94444e-07
ZNF148	1567.1	0.52528	0.53602	1.94552e-08	3.0052e-07
FKBP10	20562.1	0.46507	0.47248	1.94698e-08	3.0052e-07
PPIL1	1285.2	-0.53039	-0.54138	1.96065e-08	3.0202e-07
ZDHHC21	452.4	0.76845	0.80465	1.96082e-08	3.0202e-07
STX17	748.1	-0.67128	-0.69587	1.99227e-08	3.06542e-07
STK24	4350.1	0.65472	0.67631	2.01202e-08	3.09097e-07
PSAT1	8821.3	-0.48229	-0.49073	2.01309e-08	3.09097e-07
RP4-794I6.4	64.4	1.5008	1.87962	2.01843e-08	3.09592e-07
TRIM2	1431.2	0.73429	0.76539	2.07365e-08	3.17728e-07
CENPM	26.1	-1.79579	-2.88509	2.08363e-08	3.18873e-07
PPP2R5A	1268.8	0.63578	0.65567	2.08547e-08	3.18873e-07
ZNF451	1248.9	0.53214	0.5435	2.10833e-08	3.22032e-07
SIPA1L3	1708.6	0.8186	0.86266	2.1605e-08	3.29656e-07
CNIH3	264.9	0.86473	0.91544	2.16335e-08	3.29748e-07
ORC1	25.9	-1.76599	-2.73736	2.1866e-08	3.32945e-07
ADH1B	221.6	-1.09044	-1.21068	2.21091e-08	3.36297e-07
XYLT1	13564.1	0.77437	0.81103	2.22013e-08	3.37349e-07
MELK	206.2	-1.09815	-1.21952	2.33441e-08	3.54347e-07
TFAP2A	764.7	0.67005	0.69352	2.4048e-08	3.64653e-07
TLE4	2224.1	0.45685	0.46397	2.46982e-08	3.74126e-07
SLC25A46	1564	0.5633	0.57687	2.51172e-08	3.80079e-07
RECQL4	96.4	-1.24202	-1.42057	2.54176e-08	3.84228e-07
HMMR	46.6	-1.71565	-2.47545	2.55415e-08	3.85704e-07
USP33	2265.5	0.52116	0.53195	2.59853e-08	3.92001e-07
LZTFL1	791.6	0.58233	0.59746	2.65598e-08	4.00255e-07
TMEM155	166.8	-1.03592	-1.12985	2.74749e-08	4.1362e-07
TMEM127	5194	0.46937	0.47723	2.89444e-08	4.35295e-07
TFCP2	1048.2	-0.54595	-0.55872	2.8982e-08	4.35413e-07
NDST1	12625.8	0.52892	0.54022	2.90929e-08	4.36632e-07
STC2	18940	0.49939	0.50891	2.96371e-08	4.44345e-07
TFPI	3043.3	0.56175	0.57556	3.06555e-08	4.59143e-07
C6orf1	666.5	0.75756	0.79295	3.23265e-08	4.83675e-07
CLSTN1	8031.7	0.37771	0.38179	3.39854e-08	5.07977e-07
IMPDH2	3674.2	-0.48316	-0.49186	3.41249e-08	5.09543e-07
SKA1	25.4	-1.76378	-2.78744	3.46826e-08	5.17343e-07
ANKRD46	356.8	-0.85282	-0.90986	3.57033e-08	5.32026e-07
SMYD3	624.5	-0.68669	-0.71298	3.57929e-08	5.32819e-07
ABHD12	1940.4	0.52382	0.53518	3.6212e-08	5.38511e-07
SLC39A11	315.6	-0.79278	-0.83081	3.68563e-08	5.47537e-07
MT1X	192.8	-0.90866	-0.96497	3.74466e-08	5.55743e-07
MXRA5	12156.8	-0.57846	-0.59349	3.80366e-08	5.63928e-07
ATP6V0A1	1012.8	0.58515	0.60087	3.93686e-08	5.83085e-07
ID3	6971.3	-0.53886	-0.55122	3.94245e-08	5.83324e-07
ASCC3	6502.1	0.5573	0.57078	3.95161e-08	5.84089e-07
SLC7A14	100.1	1.36849	1.62287	4.04614e-08	5.97458e-07
C1orf109	455.5	0.7264	0.75781	4.09243e-08	6.03685e-07
FOSL1	3334.7	0.82835	0.8766	4.12998e-08	6.08611e-07
GLUL	2914.9	-0.56919	-0.58401	4.13609e-08	6.08899e-07
ASL	583.2	-0.75329	-0.78869	4.17058e-08	6.1336e-07
ALCAM	6336.1	0.48113	0.48982	4.3869e-08	6.44526e-07
HPS1	4053	0.4298	0.43597	4.41442e-08	6.4792e-07
EVI5	941.9	0.59677	0.61344	4.45906e-08	6.53816e-07
CD151	17011.8	0.35646	0.35995	4.58931e-08	6.72242e-07
TRPV2	672.2	-0.73073	-0.76321	4.66278e-08	6.82322e-07
MGAT1	8386.5	0.47219	0.48044	4.72243e-08	6.9036e-07
GGH	276.7	-1.02318	-1.12214	4.76607e-08	6.95826e-07
RAB28	455	0.68144	0.70716	4.76932e-08	6.95826e-07
CCDC186	844.9	0.61928	0.63814	4.77726e-08	6.96291e-07
RRAS2	2180	0.48286	0.49175	4.78647e-08	6.9694e-07
TWSG1	3304.5	-0.57523	-0.59049	4.8287e-08	7.02391e-07
ZNF503	712.6	-0.89571	-0.95578	4.94203e-08	7.18164e-07
NNMT	9003.1	-0.57344	-0.58853	4.95462e-08	7.19279e-07
FAM111B	15.6	-1.80356	-3.56041	4.98522e-08	7.23004e-07
CHPF2	6742.8	0.47653	0.48505	5.01444e-08	7.26523e-07
LINC01021	19.2	1.78518	3.07119	5.0703e-08	7.3389e-07
SLC35B3	1530.2	0.52174	0.53307	5.11723e-08	7.39952e-07
EIF4E3	475.6	0.7538	0.7893	5.21838e-08	7.53834e-07
APEX1	4366	-0.41896	-0.42474	5.28112e-08	7.62146e-07
MAGI2	432.9	0.73727	0.77102	5.30241e-08	7.63724e-07
SNHG1	631.8	-0.6294	-0.64931	5.30248e-08	7.63724e-07
DOCK5	2040.1	0.67224	0.69694	5.31047e-08	7.64124e-07
GAP43	66	1.35419	1.6144	5.52009e-08	7.93507e-07
C5orf30	760.3	0.68623	0.71215	5.59441e-08	8.03392e-07
TNRC6C	630.1	0.62287	0.6425	5.59983e-08	8.03392e-07
RP4-673M15.1	55.5	-1.46636	-1.89416	5.70182e-08	8.17224e-07
TUBB2A	928.3	-0.63595	-0.65677	5.85597e-08	8.38497e-07
RSL24D1	1492.9	-0.57881	-0.59498	6.08319e-08	8.70181e-07
LYPLA1	431.2	-0.69916	-0.72906	6.10144e-08	8.71941e-07
SLC6A6	3552.4	0.49398	0.50366	6.17896e-08	8.82158e-07
C19orf48	586.8	-0.66916	-0.69277	6.27869e-08	8.95523e-07
DKK3	31560	0.39401	0.39884	6.34212e-08	9.0369e-07
ABHD17C	465.1	0.68475	0.71099	6.40047e-08	9.11118e-07
SMAGP	476.8	-0.68028	-0.7077	6.48139e-08	9.21742e-07
BMP2	47.3	1.57664	2.16096	6.50703e-08	9.24491e-07
SLC36A1	2743.6	0.55453	0.56844	6.5719e-08	9.32802e-07
RP11-121P12.1	69.2	-1.39827	-1.73034	6.64942e-08	9.42892e-07
MIR99AHG	170.8	-1.18606	-1.36759	6.67405e-08	9.45469e-07
SLC35F5	2836.2	0.49254	0.50219	6.73969e-08	9.53845e-07
MMP19	1006.2	-0.56102	-0.5751	6.75154e-08	9.546e-07
CDR2L	1739.1	0.70841	0.7382	6.79833e-08	9.60289e-07
ARHGAP10	1366.4	0.54462	0.55772	6.97006e-08	9.83597e-07
AIMP2	1140.2	-0.51179	-0.52296	7.00071e-08	9.86972e-07
PBX1	5727.8	0.4235	0.42956	7.0529e-08	9.93374e-07
VSIR	2147.8	0.4479	0.45509	7.07039e-08	9.9488e-07
ASNS	4621	-0.56477	-0.57956	7.17703e-08	1.00892e-06
INPP5F	1123.3	0.55532	0.56909	7.45665e-08	1.04722e-06
ARRDC3	2912.5	0.75354	0.79035	7.51946e-08	1.05503e-06
L3MBTL3	508.2	0.66942	0.69469	7.71692e-08	1.08136e-06
GPI	3683.9	-0.43427	-0.44088	7.72187e-08	1.08136e-06
CPXM1	1611.3	-0.50763	-0.51836	7.83977e-08	1.09682e-06
CTB-25B13.12	191.2	0.92858	1.00074	7.93674e-08	1.10933e-06
CYB5R4	700.2	-0.63164	-0.65414	7.95625e-08	1.11099e-06
FST	7757	0.68852	0.71661	8.02733e-08	1.11985e-06
TUFT1	379.3	-0.94025	-1.0152	8.04394e-08	1.1211e-06
BOK	1230.4	-0.61785	-0.63699	8.07955e-08	1.12499e-06
PLPP3	6788.8	-0.71957	-0.75144	8.1113e-08	1.1277e-06
RRAGC	1369	0.62633	0.64735	8.11437e-08	1.1277e-06
AK4	73.4	-1.34894	-1.64839	8.15557e-08	1.13235e-06
RP1-152L7.5	183.6	-1.00334	-1.09106	8.18693e-08	1.13563e-06
TNFSF18	1592.4	-0.61404	-0.63303	8.42288e-08	1.16718e-06
MYO1B	7100.2	0.47247	0.48107	8.43037e-08	1.16718e-06
HECW1	170.3	0.99913	1.08875	8.4638e-08	1.17071e-06
FNBP1	1113.9	-0.57206	-0.58781	8.59562e-08	1.18782e-06
RPS19	29258.5	0.39057	0.39538	8.63839e-08	1.19237e-06
ZNF480	557.8	0.62493	0.64547	8.64484e-08	1.19237e-06
INPP1	1063.6	0.56558	0.58084	8.67315e-08	1.19515e-06
KCNE4	406.4	-0.95283	-1.0349	8.7367e-08	1.20277e-06
RP5-1148A21.3	127	1.24085	1.47602	8.77988e-08	1.20758e-06
LOXL2	39436.6	0.3602	0.36397	8.79745e-08	1.20887e-06
TRAPPC13	530.4	-0.70618	-0.73782	8.85368e-08	1.21545e-06
PGPEP1	786.5	0.76331	0.80267	8.90918e-08	1.22193e-06
RPL12	6945.8	-0.46314	-0.47131	9.01571e-08	1.23538e-06
KAZALD1	1604.6	-0.63089	-0.65187	9.12569e-08	1.24928e-06
CD44	32394.4	0.41183	0.41752	9.23066e-08	1.26247e-06
N6AMT1	476.6	-0.86197	-0.92043	9.28302e-08	1.26845e-06
TMEM176A	194.7	-0.98764	-1.0781	9.36126e-08	1.27795e-06
ADGRL2	1240.4	0.59095	0.60842	9.39427e-08	1.28126e-06
ACAN	5315.5	-0.56514	-0.57993	9.49421e-08	1.29369e-06
FEN1	340.5	-0.87373	-0.9326	9.62393e-08	1.31014e-06
ZWINT	162.7	-1.08228	-1.20566	9.86297e-08	1.34144e-06
DST	20291.3	0.67401	0.70027	1.00798e-07	1.36966e-06
FAM20A	789.5	-0.8092	-0.8558	1.0092e-07	1.37004e-06
L3HYPDH	472.2	0.70871	0.73942	1.01672e-07	1.37897e-06
DCPS	478.2	-0.68138	-0.70949	1.02908e-07	1.39408e-06
TPST2	1846.3	0.58357	0.60038	1.02976e-07	1.39408e-06
IL1RAP	863.3	0.91605	0.99051	1.03151e-07	1.39516e-06
CTSK	24919.7	0.44421	0.45145	1.03357e-07	1.39618e-06
STARD3NL	1419.4	-0.57256	-0.58887	1.03417e-07	1.39618e-06
SLMAP	1972.6	0.47746	0.48649	1.04058e-07	1.40353e-06
NUP58	1602.3	0.56718	0.58266	1.04678e-07	1.41061e-06
DDIAS	50.2	-1.41865	-1.74493	1.05556e-07	1.42112e-06
TMEM132B	257.5	0.88935	0.95219	1.05698e-07	1.42174e-06
EFL1	1198.3	0.49907	0.50947	1.06202e-07	1.4272e-06
TUBA1B	10323.3	-0.533	-0.54567	1.07097e-07	1.43791e-06
GPNMB	34853.8	0.40757	0.41315	1.07797e-07	1.44598e-06
NAGA	1734.9	-0.48716	-0.49687	1.08744e-07	1.45735e-06
PPP2R5E	1586.1	0.50091	0.51143	1.09912e-07	1.47166e-06
ZCCHC6	1518.6	0.64419	0.667	1.1019e-07	1.47403e-06
RP11-399B17.1	89.3	1.19912	1.36517	1.10401e-07	1.4755e-06
N4BP2	443.7	-0.79051	-0.83449	1.10675e-07	1.47781e-06
DHX58	936.4	-0.8695	-0.9383	1.12244e-07	1.4974e-06
UHRF1BP1L	2060.2	0.62155	0.64221	1.14558e-07	1.52688e-06
MYLIP	210.3	-0.98652	-1.09116	1.16225e-07	1.54769e-06
NFKB2	1430.6	0.48869	0.49845	1.2067e-07	1.60542e-06
KDELC2	2206.2	-0.59531	-0.61338	1.20896e-07	1.60698e-06
YBX3	5956.3	0.48528	0.4949	1.21658e-07	1.61563e-06
MMP14	58948.2	0.47237	0.48124	1.22074e-07	1.61969e-06
ITPKB	328.3	0.82397	0.87445	1.23218e-07	1.63339e-06
DYRK3	826.6	0.64914	0.67324	1.25325e-07	1.65981e-06
LEF1	78.1	-1.36983	-1.73279	1.25731e-07	1.66369e-06
B4GAT1	719.2	0.62635	0.64744	1.29772e-07	1.71561e-06
LYST	1705.4	0.65834	0.68345	1.31125e-07	1.73194e-06
AKR1B10	71.6	1.2987	1.57531	1.3134e-07	1.73322e-06
PSMC3	3602.8	-0.46173	-0.47001	1.31621e-07	1.73536e-06
PLEKHO2	2085	-0.42936	-0.43614	1.34995e-07	1.77824e-06
MREG	55	-1.45748	-2.00732	1.36136e-07	1.79167e-06
H2AFX	676.4	-0.61699	-0.63742	1.36967e-07	1.80098e-06
EPHA2	1948.6	0.62363	0.64485	1.37302e-07	1.80377e-06
AC093323.3	212.5	-0.95283	-1.03358	1.38059e-07	1.81209e-06
TDRP	144.3	0.99402	1.09347	1.40166e-07	1.8381e-06
ABHD14B	1036.8	-0.54314	-0.5563	1.4193e-07	1.85956e-06
TPT1-AS1	149.8	-0.99067	-1.08682	1.42811e-07	1.86943e-06
LINC01397	437.8	-0.69984	-0.73046	1.4517e-07	1.89862e-06
UBP1	4199.5	0.49641	0.50683	1.46447e-07	1.91361e-06
RTKN2	120.7	-1.15201	-1.30078	1.46825e-07	1.91683e-06
ERLEC1	3726.7	0.5225	0.53469	1.49364e-07	1.94825e-06
MECOM	337.7	0.78692	0.83092	1.53729e-07	2.00341e-06
SLC35E1	2764.9	0.57564	0.59212	1.54409e-07	2.01048e-06
TCF7	685.8	0.8472	0.90347	1.55418e-07	2.02182e-06
PSIP1	864.6	-0.69413	-0.72488	1.56805e-07	2.03805e-06
KANSL3	1980.3	-0.4343	-0.4412	1.59333e-07	2.06906e-06
ZFAND5	5195.1	0.52505	0.53755	1.61266e-07	2.09231e-06
DCBLD1	4561.8	0.39403	0.39919	1.61426e-07	2.09254e-06
APLP2	33919.4	0.3522	0.35588	1.62415e-07	2.1035e-06
UBE2E1	1870.8	-0.48356	-0.49376	1.62731e-07	2.10573e-06
SNX24	537.7	-0.67675	-0.70533	1.63751e-07	2.11706e-06
ZCCHC14	1731.8	0.71404	0.74776	1.6713e-07	2.15884e-06
CXorf38	484.5	-0.85325	-0.91748	1.68899e-07	2.17976e-06
FZD7	3353.1	-0.43712	-0.44416	1.70146e-07	2.19392e-06
WWC3	1959.7	0.52205	0.53426	1.73249e-07	2.23197e-06
MFSD1	3639.3	0.40279	0.40837	1.73587e-07	2.23436e-06
PKP4	1565.8	0.5097	0.52115	1.75363e-07	2.25524e-06
PCDH9	1255.2	0.62126	0.64244	1.78299e-07	2.29099e-06
MBTPS1	7943.5	0.46246	0.47098	1.80571e-07	2.31814e-06
SH3BP2	1026.4	-0.55311	-0.56809	1.8227e-07	2.3379e-06
NEK7	9420.9	-0.57562	-0.59259	1.82509e-07	2.33892e-06
AXL	20063.9	0.46674	0.47549	1.83813e-07	2.35358e-06
TMEM117	526.3	-0.79026	-0.83794	1.85409e-07	2.37194e-06
KRT34	810.2	0.56207	0.57787	1.86361e-07	2.38204e-06
GDAP1	162.2	1.04784	1.15998	1.86995e-07	2.38806e-06
KIRREL3	1052	0.51777	0.52978	1.88087e-07	2.39991e-06
TRIB1	441.7	0.93215	1.01188	1.89622e-07	2.41739e-06
ANKRD12	1329	0.64347	0.66752	1.90086e-07	2.4212e-06
CNGA3	17	1.72838	3.90718	1.90671e-07	2.42654e-06
IGF2BP1	414.4	-0.71415	-0.74712	1.91719e-07	2.43776e-06
AMPD3	418.9	0.75993	0.80154	1.92681e-07	2.44786e-06
FMNL1	242.6	-0.90524	-0.98336	1.94273e-07	2.46595e-06
FBXO33	679.6	0.61648	0.63769	1.97054e-07	2.4986e-06
PTK2	3604.2	0.60563	0.62549	1.97186e-07	2.4986e-06
FBXO30	1084.1	-0.57025	-0.58699	1.97673e-07	2.5026e-06
KRT19	854.2	0.79268	0.83796	1.98006e-07	2.50466e-06
HNMT	625.5	-0.69477	-0.726	2.0432e-07	2.58229e-06
ALDH7A1	1085.7	-0.50056	-0.51138	2.06221e-07	2.60407e-06
TUBB	32420.4	-0.53765	-0.55135	2.06837e-07	2.6096e-06
MAP1A	10628.5	0.48217	0.49192	2.11402e-07	2.6649e-06
UBE2B	1401.8	0.4939	0.50457	2.14994e-07	2.70629e-06
RP11-517I3.2	253	1.03681	1.15589	2.15055e-07	2.70629e-06
STS	1447.3	0.55734	0.5728	2.19974e-07	2.76582e-06
KHNYN	3285.4	-0.40977	-0.41575	2.22482e-07	2.79495e-06
HMGB3	249.1	-0.86955	-0.93612	2.25901e-07	2.83518e-06
FBN1	100776	0.60226	0.62183	2.26072e-07	2.83518e-06
CENPA	29.9	-1.66725	-2.7952	2.26712e-07	2.84079e-06
PJA2	4838.9	-0.4595	-0.46804	2.28306e-07	2.85832e-06
NF2	2073.9	0.5017	0.51278	2.28996e-07	2.8645e-06
SEPT10	2754.9	-0.52149	-0.53417	2.32763e-07	2.90914e-06
SYNJ2	4918.8	0.604	0.62378	2.32976e-07	2.90932e-06
SPC25	13.7	-1.71216	-3.31171	2.34494e-07	2.92578e-06
IFT20	1102.2	0.56499	0.58091	2.34768e-07	2.92671e-06
LRP10	17455.2	0.36732	0.37162	2.37297e-07	2.95572e-06
LARP4	1254.3	-0.66092	-0.68808	2.44441e-07	3.04212e-06
ZSWIM5	54.9	1.39496	1.72882	2.52543e-07	3.13959e-06
CORO2B	694.2	0.61512	0.63603	2.52702e-07	3.13959e-06
IFITM1	1087.7	-1.41526	-1.87402	2.57984e-07	3.20249e-06
SATB2	235.6	0.89051	0.96225	2.63223e-07	3.26476e-06
MSRB1	538.7	-0.6417	-0.66493	2.66555e-07	3.3033e-06
ATP13A3	15056.1	1.05834	1.18665	2.76847e-07	3.42794e-06
VASN	12903.9	0.47945	0.48928	2.78212e-07	3.44193e-06
PRKY	458.7	0.64152	0.66606	2.79264e-07	3.45203e-06
EBF3	266.5	0.87663	0.94082	2.83152e-07	3.49714e-06
HIF1A	26279.1	-0.67832	-0.7076	2.86399e-07	3.53427e-06
FEM1B	2523.5	-0.56604	-0.58264	2.92413e-07	3.60544e-06
NATD1	790.3	-0.61027	-0.63127	3.00711e-07	3.70463e-06
BACE1	4728.7	0.4521	0.46033	3.01335e-07	3.70836e-06
BRI3BP	113.9	-1.15128	-1.31702	3.01519e-07	3.70836e-06
MAP4K4	16314.5	0.68832	0.71912	3.03689e-07	3.73191e-06
CTH	228.3	-0.88226	-0.9553	3.07968e-07	3.78131e-06
BIVM	538.6	0.66223	0.68918	3.10694e-07	3.81159e-06
HR	572.5	-0.62399	-0.64615	3.11504e-07	3.81834e-06
FUBP3	2350.3	0.52424	0.53734	3.12076e-07	3.82215e-06
PDE4C	23.5	1.67686	2.75548	3.17512e-07	3.88548e-06
AP1S2	471.8	0.71374	0.74812	3.19257e-07	3.90357e-06
ZNF337	454.9	0.69516	0.7262	3.23328e-07	3.95005e-06
FBLN1	33940	-0.46649	-0.47563	3.2576e-07	3.97644e-06
MECR	485	-0.60713	-0.62742	3.32072e-07	4.05012e-06
IMPA1	322.7	-0.73645	-0.7724	3.35514e-07	4.08869e-06
ACP1	1711	-0.46458	-0.47365	3.3645e-07	4.09669e-06
OLFML3	9474.6	-0.53775	-0.55206	3.40123e-07	4.13798e-06
TEAD2	1133.5	-0.50526	-0.51737	3.49741e-07	4.25146e-06
OSBPL11	544.9	-0.6279	-0.64981	3.57811e-07	4.34595e-06
CLNS1A	2027	-0.42607	-0.43321	3.58667e-07	4.35274e-06
UNKL	623.9	-0.68963	-0.72128	3.63507e-07	4.40783e-06
TRIM55	51.9	1.4596	1.9532	3.69298e-07	4.47434e-06
GNAQ	2034.1	0.60138	0.62198	3.72261e-07	4.50651e-06
MIR663AHG	82.6	-1.44725	-1.98571	3.77456e-07	4.56563e-06
SLC26A2	875.7	-0.7691	-0.81272	3.80073e-07	4.59349e-06
UNC13A	45	1.43633	1.84223	3.84744e-07	4.64611e-06
SC5D	1259.6	0.5771	0.59543	3.87098e-07	4.67068e-06
EPHB1	61.9	1.28918	1.55958	3.89257e-07	4.69287e-06
PLP2	1534.6	-0.50214	-0.51345	4.01745e-07	4.83945e-06
ZFAS1	3896.2	-0.48065	-0.49103	4.04696e-07	4.87098e-06
MFHAS1	1143.4	0.52267	0.53581	4.11055e-07	4.94346e-06
COL5A2	74527.4	-0.55132	-0.56692	4.11771e-07	4.94801e-06
TMTC1	5836	0.45969	0.46863	4.13789e-07	4.96818e-06
TMED7	1819.2	0.67225	0.70148	4.17092e-07	5.00374e-06
NLGN2	2202	0.51651	0.52928	4.23399e-07	5.07524e-06
FOXM1	611.6	-0.61499	-0.63593	4.30494e-07	5.15607e-06
EPB41L4A-AS1	858.1	-0.5554	-0.57206	4.31378e-07	5.16244e-06
ANP32B	3176	-0.39412	-0.39982	4.41263e-07	5.27643e-06
MAP2K6	95.9	-1.24713	-1.56109	4.41992e-07	5.28083e-06
GBAS	953.8	-0.59441	-0.61444	4.42948e-07	5.28794e-06
TIPARP	4401.2	1.08785	1.23621	4.47553e-07	5.33856e-06
GPAM	629.5	-0.73203	-0.76948	4.53432e-07	5.40429e-06
USP32	1694	0.52077	0.53389	4.62003e-07	5.50197e-06
CDC45	26.8	-1.57321	-2.24828	4.64392e-07	5.5239e-06
MCM7	976.5	-0.60324	-0.62352	4.64599e-07	5.5239e-06
MRPS18B	959.6	-0.60977	-0.63146	4.75293e-07	5.64646e-06
RAPGEF1	3384.1	0.43971	0.44757	4.78485e-07	5.67978e-06
PLIN4	10.7	1.62551	6.16941	4.86272e-07	5.76754e-06
HPS3	980.2	0.55335	0.56944	4.96366e-07	5.8825e-06
PIAS2	744.9	0.56588	0.58335	5.07937e-07	6.01476e-06
PLAC9	1291.1	-0.58357	-0.60309	5.19808e-07	6.15036e-06
ATP8B4	114.6	-1.12495	-1.33098	5.29407e-07	6.25888e-06
RP4-591C20.9	232.2	-0.89333	-0.96943	5.30291e-07	6.26428e-06
CDC25A	127.4	-1.01307	-1.13599	5.38025e-07	6.35052e-06
WDR43	2508.3	0.53205	0.54631	5.39201e-07	6.35927e-06
NRSN2	2405.2	-0.43457	-0.44228	5.42598e-07	6.39418e-06
CYB5R3	18153.2	0.35113	0.35511	5.43498e-07	6.39964e-06
RYK	2181.6	0.44745	0.45589	5.46739e-07	6.43264e-06
PTGR1	1134	-0.57882	-0.59735	5.49619e-07	6.46133e-06
OGG1	600	-0.58291	-0.60156	5.54236e-07	6.51038e-06
LINC01503	292.8	-0.86891	-0.94266	5.56828e-07	6.53559e-06
ZNF512B	1728	-0.48165	-0.4922	5.60451e-07	6.57284e-06
STAC	498.9	0.76688	0.81142	5.75677e-07	6.74601e-06
PNKD	650.4	-0.58597	-0.60498	5.77393e-07	6.76072e-06
TSC22D1	2569.1	-0.48045	-0.49124	5.79269e-07	6.77726e-06
CH25H	1104.6	-1.31348	-1.70074	5.9168e-07	6.91695e-06
KCNE3	35.3	-1.55241	-2.63724	5.93977e-07	6.93826e-06
ZBTB4	3829.2	0.4157	0.42242	5.98446e-07	6.98489e-06
WWTR1	3918.6	0.57994	0.59887	6.22037e-07	7.25446e-06
ATG4A	483.6	0.59678	0.61741	6.27244e-07	7.30936e-06
NMT2	717.9	0.60018	0.62108	6.36605e-07	7.41255e-06
TRAF3	2366.8	0.46669	0.47633	6.41222e-07	7.46038e-06
ADAM12	17626.9	0.56592	0.58348	6.43534e-07	7.48134e-06
MOCOS	723.6	-0.65886	-0.68938	6.57097e-07	7.63296e-06
EML4	2299.9	-0.53865	-0.55407	6.5813e-07	7.6389e-06
SNHG8	1390.9	-0.47455	-0.48502	6.60335e-07	7.65842e-06
FGFBP2	18.3	-1.64844	-3.77365	6.63529e-07	7.68937e-06
PDIA4	6803.5	-0.45463	-0.46356	6.76491e-07	7.83339e-06
POLR1E	725.7	-0.53156	-0.5459	6.80246e-07	7.87065e-06
CASC4	4651.1	0.46391	0.47344	7.07888e-07	8.18401e-06
PP7080	228.2	-0.82833	-0.88621	7.18166e-07	8.29629e-06
DNAJB11	1751.8	-0.52939	-0.54398	7.27164e-07	8.39362e-06
MAVS	3931.6	0.44262	0.45092	7.31809e-07	8.44058e-06
DNAJC22	102.3	-1.13028	-1.30855	7.34523e-07	8.46522e-06
TFAM	762.3	0.5997	0.62122	7.35877e-07	8.47416e-06
KIAA1524	146	-0.98182	-1.08898	7.36642e-07	8.47631e-06
SDC1	1307.5	0.57445	0.59245	7.41449e-07	8.52491e-06
MAIP1	376	-0.73461	-0.77741	7.5117e-07	8.62991e-06
SCARF2	2119.6	0.53439	0.54941	7.72138e-07	8.86385e-06
SRGAP1	3036.9	0.63098	0.65606	7.75465e-07	8.89507e-06
KIF1C	9904.5	0.46681	0.47662	7.77585e-07	8.91242e-06
ELOVL2	142.5	1.11252	1.27115	7.79055e-07	8.92228e-06
RP13-1032I1.7	69.3	-1.29729	-1.5955	7.99756e-07	9.15221e-06
EPS8L2	1407.5	0.6031	0.625	8.18941e-07	9.36444e-06
AFDN	1130.6	0.51274	0.52601	8.34952e-07	9.54007e-06
HERC3	1361	0.48096	0.49175	8.39047e-07	9.57939e-06
HAS2	4527.2	0.4703	0.48037	8.46145e-07	9.65291e-06
MRPL42	844.6	-0.50813	-0.52144	8.54714e-07	9.74308e-06
DHX33	1222.4	0.4602	0.46963	8.69078e-07	9.89911e-06
FZD2	1105.9	-0.60944	-0.63255	8.80374e-07	1.002e-05
CTNND1	8053.5	-0.37284	-0.37774	8.89331e-07	1.01141e-05
KITLG	5333.4	0.70025	0.73581	9.02629e-07	1.02573e-05
BEX4	783.1	0.55858	0.57603	9.12113e-07	1.03571e-05
CFAP97	1664	0.50066	0.51304	9.26311e-07	1.05102e-05
RNASEH2C	608.5	-0.5448	-0.56076	9.28282e-07	1.05207e-05
ZFC3H1	974.2	0.68858	0.7221	9.28675e-07	1.05207e-05
GPR176	7971.9	-0.45035	-0.45939	9.49999e-07	1.07539e-05
TTC19	727.6	-0.54282	-0.55895	9.56288e-07	1.08168e-05
PLEKHB2	4137.1	-0.52058	-0.53469	9.62425e-07	1.08778e-05
CHCHD3	1104.4	-0.50684	-0.52131	9.65087e-07	1.08995e-05
ZHX3	3528.8	0.38405	0.38953	9.8414e-07	1.11061e-05
DSCR3	2812.7	0.43639	0.44454	9.85872e-07	1.11171e-05
SLC30A1	2123.2	0.49518	0.50735	9.97997e-07	1.12451e-05
SLC16A4	333.6	-0.84158	-0.91451	9.99647e-07	1.1248e-05
FOXC2	187.6	0.97735	1.08019	9.99791e-07	1.1248e-05
ITGA8	173.4	0.92464	1.01751	1.00165e-06	1.12603e-05
JPH2	460.3	-0.77475	-0.82167	1.01836e-06	1.14394e-05
ATP2C1	5512.2	0.39715	0.40324	1.03044e-06	1.15662e-05
DCAF4	579.6	-0.7116	-0.75039	1.04925e-06	1.17683e-05
DES	423.6	-0.81289	-0.87064	1.06143e-06	1.18958e-05
PLEKHJ1	961.1	-0.52731	-0.54188	1.07358e-06	1.20228e-05
MT1F	11.1	-1.59967	-3.28638	1.07753e-06	1.20578e-05
GABBR2	693	0.61958	0.64343	1.08277e-06	1.21072e-05
WDR45	1937.9	0.41368	0.42064	1.09621e-06	1.22481e-05
TAOK3	1576.2	0.46137	0.47113	1.10857e-06	1.23768e-05
TUBA1A	6711.4	-0.41976	-0.42703	1.1153e-06	1.24377e-05
KCTD1	280.6	0.74728	0.79158	1.11573e-06	1.24377e-05
TMED3	3685	0.39899	0.40522	1.12259e-06	1.25048e-05
KIAA1217	506.7	0.61946	0.64435	1.12481e-06	1.25199e-05
PAPOLA	4883	0.43439	0.44247	1.1262e-06	1.25259e-05
FGFR1OP	239.5	0.85388	0.92487	1.13837e-06	1.26516e-05
INAFM2	933.7	0.51651	0.53041	1.16834e-06	1.29748e-05
DYNLT3	903.7	0.5577	0.57513	1.17915e-06	1.3085e-05
KIT	140.4	1.15608	1.36191	1.19253e-06	1.32235e-05
WDR35	699.1	0.54612	0.56248	1.23091e-06	1.36387e-05
SCYL2	2532.8	0.49018	0.50209	1.23193e-06	1.36397e-05
CHN1	3514.8	-0.4236	-0.4309	1.24623e-06	1.37876e-05
IRF2BP2	2494.8	0.49008	0.50208	1.27846e-06	1.41335e-05
RAVER2	200.9	-0.89208	-0.98424	1.29421e-06	1.42969e-05
IP6K1	1808	-0.52033	-0.53478	1.32315e-06	1.46055e-05
MSH2	448.9	-0.60995	-0.63182	1.33837e-06	1.47624e-05
ZNF654	794	0.60611	0.62969	1.34565e-06	1.48172e-05
GINS4	78.1	-1.14694	-1.33749	1.34575e-06	1.48172e-05
ABCC4	1758.9	0.48684	0.49851	1.34638e-06	1.48172e-05
MFAP4	23144.8	-0.55622	-0.57421	1.35889e-06	1.49437e-05
MCM3	787.3	-0.52325	-0.53781	1.36162e-06	1.49625e-05
FGD5-AS1	3592.7	0.40963	0.41647	1.39017e-06	1.52648e-05
ZNF770	1380.5	0.49527	0.50763	1.39717e-06	1.53189e-05
ALDOC	350.8	-0.87589	-0.95258	1.39719e-06	1.53189e-05
PAICS	2669.4	-0.4498	-0.45901	1.42236e-06	1.55831e-05
PRRG1	536.5	-0.71249	-0.75277	1.42532e-06	1.5604e-05
TSPYL4	839.3	-0.47741	-0.48804	1.42879e-06	1.56303e-05
RP2	1109.3	0.79012	0.84694	1.43403e-06	1.56758e-05
SLC41A2	1041.9	0.67045	0.70256	1.44222e-06	1.57536e-05
TEK	375.2	0.75483	0.80094	1.45668e-06	1.58998e-05
PCNP	3011.8	0.4451	0.45404	1.46594e-06	1.59888e-05
FAM214A	831.8	0.52744	0.54268	1.47011e-06	1.60225e-05
STK39	1264	-0.48777	-0.49926	1.48282e-06	1.6149e-05
VAT1L	304.1	0.92464	1.01455	1.49157e-06	1.62322e-05
RP11-513I15.6	47.7	1.33237	1.70835	1.51573e-06	1.64828e-05
ZNF267	391.9	0.95596	1.06531	1.52594e-06	1.65816e-05
CARD9	165.2	-1.15668	-1.37429	1.535e-06	1.66677e-05
CROT	726.2	0.61556	0.64036	1.53628e-06	1.66692e-05
ESCO2	25.8	-1.53018	-2.42614	1.53746e-06	1.66696e-05
RB1	2186.7	0.55873	0.57696	1.53962e-06	1.66808e-05
CHAF1B	113.1	-1.04468	-1.19271	1.54919e-06	1.67721e-05
RMND1	628.7	-0.5881	-0.61021	1.56085e-06	1.68857e-05
FAM8A1	1426.5	0.50348	0.51667	1.57079e-06	1.69808e-05
IL17RB	117	1.04192	1.18685	1.57938e-06	1.70611e-05
TMSB10	34333.8	-0.35992	-0.36461	1.58742e-06	1.71353e-05
ARL4D	453.6	-0.64399	-0.67194	1.60315e-06	1.72923e-05
DNAJB1	2644.2	0.41447	0.42173	1.62053e-06	1.74669e-05
SLC9A3R2	1506.2	-0.49937	-0.51232	1.63119e-06	1.75689e-05
C22orf39	361.6	-0.6726	-0.70554	1.63815e-06	1.76309e-05
SDC3	7026.3	0.39014	0.39616	1.65417e-06	1.77902e-05
ATF7	1156	-0.45994	-0.47016	1.66344e-06	1.78768e-05
DICER1	3126.3	-0.54737	-0.56452	1.6764e-06	1.80029e-05
KLHL15	311.7	-0.78861	-0.84522	1.68098e-06	1.80389e-05
LPAR3	52.1	-1.49466	-2.21495	1.68703e-06	1.80905e-05
CYP2U1	1017.2	0.52642	0.5419	1.69286e-06	1.81398e-05
ECHDC3	57.2	-1.28196	-1.5931	1.69632e-06	1.81635e-05
WISP2	281.6	-0.7628	-0.82148	1.70603e-06	1.82542e-05
SCN2A	37.5	1.38546	1.85335	1.71947e-06	1.83846e-05
HIST1H2BD	58.2	1.26646	1.61638	1.72755e-06	1.84575e-05
RPL3	28371.2	-0.41651	-0.42388	1.73095e-06	1.84803e-05
ARL5A	310.7	0.68645	0.7208	1.75424e-06	1.87153e-05
HS2ST1	617.3	-0.67562	-0.71071	1.75553e-06	1.87155e-05
EXO1	41.4	-1.44693	-2.09067	1.76772e-06	1.88317e-05
C3	479.5	-0.74782	-0.80316	1.77353e-06	1.88798e-05
CRELD2	1312.4	-0.51155	-0.52539	1.79953e-06	1.91427e-05
RABGGTA	695.7	0.56477	0.58382	1.81549e-06	1.92985e-05
MFSD7	408.8	-0.63986	-0.66717	1.85393e-06	1.96928e-05
PREX1	191	-0.84704	-0.91916	1.86425e-06	1.97881e-05
RHNO1	729.3	-0.5198	-0.53463	1.876e-06	1.98983e-05
RAB27A	700.8	-0.56528	-0.58503	1.88091e-06	1.9936e-05
HTATIP2	1125.3	0.52657	0.54218	1.89881e-06	2.01112e-05
BCL7A	409.4	0.85844	0.93188	1.93707e-06	2.05016e-05
ROBO1	3352.3	0.45032	0.45983	1.94e-06	2.05178e-05
SBF2-AS1	225.3	-0.84354	-0.91458	1.95586e-06	2.06638e-05
ST3GAL5	210.9	-0.82969	-0.89635	1.95663e-06	2.06638e-05
EMILIN1	9640.8	-0.39244	-0.39866	2.01105e-06	2.12233e-05
AIFM1	881.8	-0.49185	-0.5045	2.02402e-06	2.13447e-05
BECN1	2882	0.40153	0.40824	2.04153e-06	2.15139e-05
ADO	1190.1	0.45876	0.4687	2.04771e-06	2.15635e-05
ZSWIM8	3138.6	0.48522	0.4972	2.06576e-06	2.1738e-05
RALGAPB	3415.9	0.37071	0.37594	2.06763e-06	2.1742e-05
GPRC5B	246.4	0.95666	1.06485	2.07358e-06	2.1789e-05
MFSD14B	2125.5	-0.51442	-0.52889	2.10459e-06	2.20989e-05
SPOCD1	2070.9	-0.46298	-0.47319	2.10822e-06	2.21212e-05
ELOA	3080.5	0.5622	0.58129	2.12114e-06	2.22409e-05
ABCC3	1819.3	-0.51439	-0.52881	2.1274e-06	2.22906e-05
ZBTB7A	2266.5	0.48521	0.49732	2.1407e-06	2.24139e-05
ATM	2228.5	0.5019	0.51528	2.15149e-06	2.25108e-05
RAB22A	2392.8	0.44495	0.45421	2.16893e-06	2.26771e-05
ATP5SL	1186.2	-0.47056	-0.48163	2.17865e-06	2.27624e-05
CPED1	1535.5	0.51528	0.53002	2.20756e-06	2.3048e-05
AK3	2443.8	0.43335	0.44191	2.25041e-06	2.34786e-05
CCNE2	21.3	-1.55175	-2.55608	2.26259e-06	2.3576e-05
MADD	1827.3	0.42522	0.43325	2.26296e-06	2.3576e-05
PPP3R1	1679.7	0.53292	0.5492	2.27678e-06	2.37031e-05
TPD52L2	7183.6	0.34558	0.34986	2.29028e-06	2.38267e-05
AKR1C3	506.2	-0.6184	-0.64442	2.2959e-06	2.38673e-05
AMOTL1	4163.1	0.53037	0.54638	2.29744e-06	2.38673e-05
BARD1	117.9	-1.06712	-1.23441	2.30618e-06	2.39411e-05
TBC1D9	1676.8	0.53533	0.55195	2.34061e-06	2.42718e-05
ACAD9	1321.5	-0.42147	-0.42927	2.34134e-06	2.42718e-05
CMTM3	1436.9	0.46283	0.47314	2.34885e-06	2.43324e-05
UBXN8	326.7	-0.70503	-0.75023	2.35848e-06	2.44149e-05
DDX21	6637.6	-0.58457	-0.60662	2.38149e-06	2.46249e-05
TSC22D2	1173	-0.55591	-0.57475	2.38213e-06	2.46249e-05
PGM2L1	715.1	0.71461	0.75593	2.38794e-06	2.46666e-05
SFXN3	1325.2	0.43346	0.44194	2.38953e-06	2.46666e-05
TOX	529.8	-0.85889	-0.93205	2.39604e-06	2.47164e-05
ANKRD13A	4155	0.40694	0.41402	2.43275e-06	2.50676e-05
SNHG15	367.6	-0.68171	-0.71781	2.43351e-06	2.50676e-05
SAMD8	1504.3	-0.52152	-0.53699	2.44199e-06	2.51372e-05
LIMCH1	2995.6	0.43413	0.44276	2.44661e-06	2.51671e-05
PPL	306.6	-0.74646	-0.79505	2.4495e-06	2.51791e-05
ADCY3	3128.8	-0.46887	-0.47992	2.45664e-06	2.52349e-05
MAPRE2	1068.2	-0.49048	-0.5032	2.46585e-06	2.53117e-05
SNX9	10743.8	0.62468	0.6519	2.47126e-06	2.53495e-05
CNOT7	1784.8	0.46546	0.47618	2.47951e-06	2.54019e-05
NAA40	499.7	-0.63852	-0.66716	2.47984e-06	2.54019e-05
PTPRF	2526.6	0.4377	0.44648	2.52923e-06	2.58897e-05
HNRNPUL2	1777	0.45746	0.46766	2.56168e-06	2.62026e-05
PAPSS2	5668.6	0.38023	0.38601	2.56338e-06	2.62026e-05
TBX3	6154.4	0.46235	0.47293	2.58404e-06	2.63954e-05
GPAT4	3384	0.3768	0.38244	2.61549e-06	2.66981e-05
CENPH	38.6	-1.38729	-1.88517	2.62127e-06	2.67384e-05
ADH5	5571.1	-0.40115	-0.40806	2.64967e-06	2.70093e-05
TMEM9	1288.3	-0.50474	-0.51874	2.66157e-06	2.71117e-05
TMEM260	673	0.54703	0.56501	2.71171e-06	2.76033e-05
ZMYM3	746.6	-0.64526	-0.6754	2.76619e-06	2.81325e-05
ID4	400.1	-0.7906	-0.84636	2.76754e-06	2.81325e-05
SCN3A	49.2	1.30067	1.69368	2.79712e-06	2.84135e-05
LMNA	21712.2	0.3222	0.32571	2.817e-06	2.85956e-05
FADS3	3291	-0.40977	-0.41716	2.82016e-06	2.86078e-05
CCNYL1	864.2	-0.63143	-0.66187	2.82997e-06	2.86875e-05
SLC9A7	1357.4	0.67696	0.71241	2.84856e-06	2.88559e-05
SMARCAD1	1466.7	0.44516	0.45462	2.85974e-06	2.89492e-05
XRCC3	51.8	-1.32627	-1.74568	2.87624e-06	2.90961e-05
JAK3	288.9	-0.76886	-0.82982	2.89208e-06	2.92362e-05
PM20D2	75.8	-1.22627	-1.60571	2.91745e-06	2.94723e-05
TMEM18	902.8	-0.51121	-0.52632	2.93663e-06	2.96456e-05
EXOSC9	719.7	-0.63343	-0.66181	2.93873e-06	2.96463e-05
ALPK1	529	-0.66217	-0.69602	2.99195e-06	3.01625e-05
ELANE	29.7	-1.48539	-2.53969	3.03646e-06	3.05901e-05
DNAJC16	795.1	0.50239	0.51605	3.09623e-06	3.11375e-05
IFNAR1	3295.9	0.42402	0.43223	3.09672e-06	3.11375e-05
TDRD7	896.7	0.78507	0.84756	3.09717e-06	3.11375e-05
PTCHD4	56.5	1.34761	1.92903	3.10259e-06	3.11668e-05
ROGDI	270	-0.6961	-0.73274	3.10434e-06	3.11668e-05
AGPAT2	735.9	-0.52727	-0.54336	3.11453e-06	3.12477e-05
GPR68	456.7	1.25274	1.55559	3.1432e-06	3.15126e-05
ATG14	886.7	0.54934	0.56786	3.14524e-06	3.15126e-05
CAPG	1094.9	-0.46479	-0.47558	3.20772e-06	3.21166e-05
ALPK2	6847.5	0.35938	0.36434	3.22405e-06	3.22581e-05
RCN1	8642.4	0.38438	0.39049	3.23543e-06	3.23499e-05
FADS2	13861.3	-0.39651	-0.40327	3.24108e-06	3.23843e-05
SLC12A6	1074.8	-0.48613	-0.49886	3.25136e-06	3.24648e-05
STAG1	2879.7	0.42577	0.43413	3.2763e-06	3.26915e-05
PITX2	300.4	-0.77894	-0.83201	3.29878e-06	3.28935e-05
E2F1	53.4	-1.26854	-1.61511	3.31764e-06	3.30591e-05
KRT7	4047	-0.57775	-0.59907	3.33811e-06	3.32404e-05
SCAMP2	2274.3	0.37841	0.38426	3.38635e-06	3.36979e-05
TTC39C	943.3	0.50895	0.5235	3.40982e-06	3.39084e-05
SENP6	3595.8	0.42068	0.42881	3.43897e-06	3.4175e-05
OPCML	269.7	0.76395	0.81836	3.44947e-06	3.42562e-05
GDF15	3323	0.6696	0.70618	3.46302e-06	3.43674e-05
INHBE	77.7	-1.32466	-1.89847	3.47737e-06	3.44865e-05
MAP3K1	417.7	0.68674	0.72395	3.48856e-06	3.45741e-05
WTIP	1243	0.45499	0.46535	3.51399e-06	3.48025e-05
ADAMTSL1	2926	0.45693	0.46737	3.58896e-06	3.5521e-05
CMPK1	4519.1	0.44065	0.45003	3.6306e-06	3.59088e-05
PGK1	8715.7	-0.34482	-0.34927	3.63843e-06	3.5962e-05
PABPC4	4934.5	0.35586	0.36076	3.65367e-06	3.60883e-05
LINC00578	129.3	-0.94766	-1.06097	3.72106e-06	3.67291e-05
CDCA4	257.6	-0.75673	-0.80853	3.75872e-06	3.70566e-05
PRPF4B	2325.5	0.54613	0.56459	3.75929e-06	3.70566e-05
PLPP4	575.7	0.54652	0.56486	3.78357e-06	3.72531e-05
LATS1	1375.9	-0.47477	-0.48692	3.78431e-06	3.72531e-05
CANT1	2816.2	0.40161	0.40868	3.84668e-06	3.78416e-05
GPT2	892.8	-0.62352	-0.65174	3.88636e-06	3.82063e-05
ZSWIM7	186.6	-0.84319	-0.92218	3.89995e-06	3.83142e-05
EXOC5	2433.8	0.45599	0.46654	3.9506e-06	3.87858e-05
CD58	250.7	0.81917	0.88729	4.01562e-06	3.93977e-05
SLC1A5	10272.9	-0.49427	-0.50797	4.22974e-06	4.14707e-05
RP4-663N10.1	57.4	1.23048	1.60842	4.26036e-06	4.1743e-05
PFAS	788.8	-0.5215	-0.5373	4.28165e-06	4.19035e-05
OPTN	7037.7	0.50517	0.51975	4.28247e-06	4.19035e-05
PPDPF	3848.4	-0.41463	-0.42244	4.30663e-06	4.21119e-05
YWHAG	9562.8	0.48454	0.49742	4.32755e-06	4.22881e-05
CDC25C	17.6	-1.5163	-2.76166	4.39999e-06	4.29674e-05
CALU	62593	0.4325	0.44153	4.41012e-06	4.30376e-05
KCTD15	1657.6	-0.50684	-0.52165	4.42269e-06	4.31315e-05
ZMYND11	3682.3	0.37525	0.38109	4.42708e-06	4.31456e-05
ABCA9	79.1	1.14832	1.38785	4.49057e-06	4.37352e-05
FAM83H	473.8	0.56816	0.58931	4.52993e-06	4.40893e-05
TMEM104	1871.2	0.43544	0.44465	4.57359e-06	4.44847e-05
DENND3	491.2	0.76435	0.81995	4.58135e-06	4.45306e-05
KIF26B	4139.3	-0.49535	-0.50912	4.59453e-06	4.46291e-05
RANBP2	4036.6	0.56208	0.5826	4.60663e-06	4.4717e-05
RP11-983P16.4	97.1	-0.97788	-1.09646	4.74732e-06	4.60521e-05
SLC4A11	146.6	1.03005	1.18306	4.75089e-06	4.60563e-05
NHSL2	215.5	0.77459	0.8284	4.77724e-06	4.62811e-05
EYA4	55.2	-1.33375	-1.93093	4.78529e-06	4.63284e-05
CORO1C	12855.7	0.47725	0.48963	4.80733e-06	4.65111e-05
ELF2	986.3	-0.49846	-0.51271	4.89097e-06	4.72891e-05
DTD2	472.1	-0.55301	-0.57285	4.91968e-06	4.75352e-05
MARCH8	1498.7	0.4011	0.40835	4.94202e-06	4.77196e-05
DNMBP	2430.9	0.44747	0.45756	4.9752e-06	4.80084e-05
CFDP1	1043.1	0.48515	0.49832	4.98087e-06	4.80315e-05
COMMD1	684.2	-0.52218	-0.53907	5.05112e-06	4.86768e-05
GOLGB1	4920	0.61465	0.64205	5.07801e-06	4.88944e-05
MAPKBP1	1545.6	0.42898	0.43792	5.08037e-06	4.88944e-05
COL4A5	2887.1	0.60503	0.63126	5.16562e-06	4.96822e-05
MAP4K5	3213.5	0.52387	0.54073	5.17346e-06	4.9725e-05
EXT1	16770.3	0.5287	0.54584	5.18823e-06	4.98342e-05
GALC	1077.1	0.48335	0.49626	5.19172e-06	4.98351e-05
CHIC1	310.9	0.70505	0.74855	5.23882e-06	5.02543e-05
KLHDC7B	238.9	-1.13631	-1.52823	5.25804e-06	5.04056e-05
MFN1	1868.7	0.43307	0.44232	5.2665e-06	5.04537e-05
C2CD2	1924.4	0.52465	0.54149	5.30741e-06	5.08124e-05
ADM	3075.4	-1.22917	-1.54583	5.31546e-06	5.08562e-05
CCNF	206.6	-0.79363	-0.85142	5.36371e-06	5.12843e-05
LOXL1-AS1	455.4	-0.5917	-0.61583	5.38384e-06	5.14432e-05
TEX9	90.4	1.09263	1.2985	5.40253e-06	5.15881e-05
SPC24	27.3	-1.44106	-2.15106	5.40607e-06	5.15884e-05
IRX3	305.7	-0.67593	-0.71791	5.42506e-06	5.17358e-05
ABCE1	2652.4	0.38962	0.39625	5.43972e-06	5.18419e-05
POLR2G	1297	-0.4133	-0.4212	5.46097e-06	5.201e-05
SYT7	212.1	0.85009	0.92837	5.46446e-06	5.201e-05
RNF139	1293.7	0.42157	0.4301	5.49265e-06	5.22444e-05
PRKG2	220.9	0.87337	0.96256	5.50331e-06	5.23118e-05
ZNF843	70.9	-1.20773	-1.58725	5.50884e-06	5.23304e-05
C7orf50	1065.5	-0.45948	-0.47028	5.52916e-06	5.24894e-05
NINJ1	1549.4	0.48188	0.4948	5.5494e-06	5.26475e-05
CERK	3129.9	0.36841	0.37409	5.6082e-06	5.31708e-05
NCS1	3829.1	0.52546	0.5425	5.66093e-06	5.3636e-05
MRVI1	2050.3	-0.47061	-0.48269	5.72358e-06	5.41945e-05
ARHGAP18	2088.6	0.49781	0.51216	5.78611e-06	5.4737e-05
DOCK11	1070.1	0.49065	0.50439	5.78834e-06	5.4737e-05
WIPF1	1860.2	0.48357	0.49671	5.81218e-06	5.4927e-05
TIMM13	1222.6	-0.43496	-0.44449	5.95549e-06	5.6245e-05
RGS7	50.8	1.25522	1.60365	6.08209e-06	5.74036e-05
AC093627.10	61.9	-1.21003	-1.50493	6.10197e-06	5.75542e-05
XPC	3517.8	0.43787	0.44756	6.10889e-06	5.75824e-05
YARS	7739.5	-0.366	-0.37163	6.14466e-06	5.78823e-05
PDE12	588.1	-0.51956	-0.53673	6.171e-06	5.80685e-05
SREBF1	1548.6	-0.56817	-0.59025	6.17235e-06	5.80685e-05
ZFPM1	274.8	0.73047	0.78087	6.18889e-06	5.81867e-05
SPIDR	1304.7	-0.49004	-0.50376	6.25421e-06	5.87631e-05
ZNF689	386.9	-0.63627	-0.66736	6.27238e-06	5.88961e-05
CAPN7	1380.2	0.4104	0.41836	6.32745e-06	5.93751e-05
FDX1	421.3	0.62391	0.65417	6.33852e-06	5.94097e-05
NPAS1	509.1	-0.7726	-0.83304	6.33926e-06	5.94097e-05
EZH2	205.7	-0.77912	-0.83946	6.35357e-06	5.95059e-05
RIPK4	136	1.13	1.33615	6.38879e-06	5.97974e-05
DIDO1	2452.7	0.39462	0.40168	6.39775e-06	5.98431e-05
ESM1	682.6	0.66672	0.70367	6.42934e-06	6.01002e-05
CLU	6907.4	0.38982	0.39663	6.44026e-06	6.01639e-05
KDELR3	3512.1	0.35242	0.3574	6.46572e-06	6.03632e-05
GOLT1B	1362.6	0.52257	0.53941	6.53005e-06	6.09216e-05
NCAPG2	297.9	-0.716	-0.75931	6.53385e-06	6.09216e-05
ATP1A1	16450.6	0.37063	0.37647	6.54181e-06	6.0957e-05
ALDH1A3	111.5	-0.95471	-1.07936	6.65582e-06	6.198e-05
APBB1IP	602.2	0.5169	0.53338	6.72439e-06	6.25787e-05
ARHGAP12	1623.6	0.42036	0.42904	6.78071e-06	6.30628e-05
DEPDC1B	30.8	-1.38736	-1.94095	6.79072e-06	6.31157e-05
RORA	283.4	0.82813	0.90508	6.87154e-06	6.38265e-05
SLC25A23	1647.4	0.39636	0.40354	6.94283e-06	6.44477e-05
AC009948.5	120.8	-1.026	-1.22188	6.96764e-06	6.46371e-05
PCGF3	1973.5	0.37383	0.37987	6.99562e-06	6.48556e-05
MAN1B1	4005.3	0.3559	0.3611	7.14138e-06	6.61651e-05
ARHGAP11B	72.3	-1.09479	-1.30951	7.19207e-06	6.65926e-05
SERPINB9	155.3	-1.05757	-1.26541	7.21403e-06	6.67537e-05
HECW2	805.8	0.5124	0.52847	7.28961e-06	6.74105e-05
RAPGEF2	2310.8	0.51951	0.53639	7.31765e-06	6.76271e-05
PIF1	89.2	-1.07211	-1.26463	7.42905e-06	6.86133e-05
ZNF37A	1016.8	0.499	0.51385	7.43556e-06	6.86302e-05
PRR3	380.6	-0.62131	-0.65045	7.49116e-06	6.90998e-05
RPUSD4	704.2	-0.51971	-0.53731	7.51834e-06	6.93069e-05
P2RX7	117.5	-1.13976	-1.46614	7.57929e-06	6.98248e-05
GPRIN1	167.7	0.86943	0.95611	7.60626e-06	7.00292e-05
ARHGEF7	2027.8	0.39211	0.39915	7.61512e-06	7.00668e-05
TICRR	35.7	-1.36717	-1.8939	7.63066e-06	7.01656e-05
RFXANK	818.7	-0.50771	-0.52337	7.72776e-06	7.1014e-05
SDE2	682.8	-0.55405	-0.57537	7.73991e-06	7.1081e-05
FKTN	1018.7	0.46955	0.48178	7.80384e-06	7.16232e-05
LTN1	1670.3	0.50463	0.52005	7.81158e-06	7.16494e-05
SQLE	3560.6	0.56355	0.58528	7.86696e-06	7.21057e-05
NAV2	5074.2	0.58047	0.60456	7.87117e-06	7.21057e-05
SCAMP1	912.4	0.56599	0.58835	7.87968e-06	7.21385e-05
GLT8D1	3045.8	0.36834	0.37417	7.90164e-06	7.22943e-05
CENPBD1P1	1448	0.42571	0.43486	7.956e-06	7.27463e-05
IGF1	97.7	-1.2848	-1.65336	8.02009e-06	7.32865e-05
RNASEL	743.5	-0.52114	-0.53879	8.03658e-06	7.33676e-05
EDEM1	2210.8	0.4733	0.48597	8.04007e-06	7.33676e-05
BCAT2	586	-0.54405	-0.56362	8.04663e-06	7.33676e-05
ADGRA3	986.1	0.50701	0.5228	8.05364e-06	7.33676e-05
PDE7A	295.2	0.76643	0.82554	8.05401e-06	7.33676e-05
TNIP1	4454.7	0.39959	0.4071	8.07323e-06	7.3497e-05
ROCK1	3369.5	0.429	0.43836	8.10247e-06	7.37174e-05
ULBP1	362.2	0.69367	0.73648	8.23196e-06	7.48491e-05
POLR2A	6162.7	-0.33203	-0.33626	8.30585e-06	7.5474e-05
EML1	2034.3	0.40303	0.41077	8.32598e-06	7.561e-05
YRDC	705.3	-0.5152	-0.53373	8.42937e-06	7.65015e-05
DCAF10	1369.9	0.4383	0.44827	8.43476e-06	7.6503e-05
TMEM159	579.2	0.59621	0.6229	8.48652e-06	7.69248e-05
THSD1	170.6	1.01997	1.19966	8.499e-06	7.69903e-05
CLIP2	3788.9	0.40306	0.41082	8.53548e-06	7.7273e-05
ARHGAP1	5888.4	0.35197	0.35708	8.56937e-06	7.75319e-05
STEAP2	377.6	-0.73714	-0.80257	8.58335e-06	7.76104e-05
GFPT2	1326	0.47251	0.48507	8.7496e-06	7.90649e-05
UHRF2	1568.3	0.396	0.40338	8.92665e-06	8.05689e-05
CARMN	347.3	-0.96085	-1.08571	8.92704e-06	8.05689e-05
CFI	225.4	-0.9058	-1.01409	8.96005e-06	8.0817e-05
ARHGEF40	6110	0.35423	0.35947	9.09995e-06	8.20283e-05
TRIM8	3351.9	0.35528	0.36058	9.13001e-06	8.22487e-05
ERCC2	1724.6	-0.42786	-0.43691	9.17871e-06	8.26366e-05
GALM	285.5	-0.72347	-0.77446	9.18707e-06	8.26611e-05
NR1H3	275.9	-0.71653	-0.76336	9.19487e-06	8.26805e-05
SCUBE3	659.2	-0.68968	-0.72976	9.20707e-06	8.27393e-05
GTF3C6	1118.4	-0.47342	-0.4862	9.29094e-06	8.34419e-05
SELPLG	236.8	0.77495	0.83881	9.31269e-06	8.3586e-05
WDHD1	304.2	-0.66583	-0.70426	9.48027e-06	8.5038e-05
TMEM52B	45.4	-1.24807	-1.68143	9.50885e-06	8.52422e-05
CTPS1	2365.4	-0.70472	-0.75102	9.51651e-06	8.52586e-05
LAMC2	382.4	0.66661	0.70403	9.55392e-06	8.55415e-05
BAG2	2794	-0.45787	-0.46934	9.79511e-06	8.76271e-05
STK4	1619.9	-0.42422	-0.43359	9.79882e-06	8.76271e-05
POLR3F	389.8	-0.68472	-0.72701	9.86402e-06	8.81563e-05
LRRC17	253.5	0.69371	0.73862	1.00467e-05	8.97343e-05
NOP14-AS1	563.9	-0.55553	-0.57605	1.01065e-05	9.02129e-05
RFNG	1360.9	0.45909	0.47087	1.01452e-05	9.05039e-05
RP11-332M2.1	96.5	1.06204	1.26437	1.01639e-05	9.06149e-05
APOBEC3G	382.8	-0.90678	-1.02731	1.02352e-05	9.11955e-05
C3orf67	234.7	0.7688	0.83075	1.03044e-05	9.17558e-05
VAMP5	1246.2	-0.49151	-0.50625	1.03172e-05	9.18144e-05
MYO6	1755.8	0.44947	0.46063	1.03605e-05	9.2144e-05
RP11-326I11.3	76.7	-1.1265	-1.3963	1.05562e-05	9.3827e-05
BICD2	2191.9	0.39625	0.40378	1.06451e-05	9.45599e-05
ZNF83	628.2	0.49323	0.50806	1.07254e-05	9.52156e-05
LSM11	297	-0.74474	-0.8006	1.08141e-05	9.59447e-05
CHPT1	1078	0.46212	0.47426	1.0837e-05	9.60901e-05
KLF3	2186.7	0.48833	0.50278	1.08674e-05	9.62733e-05
USP34	6063.1	0.44387	0.45459	1.08708e-05	9.62733e-05
TNFAIP3	753.7	0.79017	0.85936	1.09504e-05	9.69192e-05
PSMC3IP	75.6	-1.05438	-1.23421	1.10115e-05	9.74013e-05
ARPC5	6186.9	0.43673	0.44693	1.10636e-05	9.78029e-05
MKRN1	2384.8	0.39916	0.40693	1.11686e-05	9.86714e-05
LSS	4043.7	-0.33101	-0.33539	1.12528e-05	9.93557e-05
ATRX	2519.4	0.43418	0.44422	1.12612e-05	9.93702e-05
UBLCP1	1551.8	0.43096	0.44076	1.13047e-05	9.96941e-05
RPS2P5	1085.7	-0.42639	-0.43592	1.13167e-05	9.97397e-05
NDUFS2	2417.1	-0.38937	-0.39654	1.13282e-05	9.97804e-05
MARCH3	322.5	0.63325	0.6663	1.14457e-05	0.000100755
EIF5A2	626	0.58368	0.60991	1.14909e-05	0.000101092
PURA	1205.7	0.57063	0.59442	1.15914e-05	0.000101916
NHP2	1012.1	-0.45194	-0.46337	1.16246e-05	0.000102146
GNA12	5744.5	0.36563	0.37156	1.16443e-05	0.000102258
TMEM161B	289.6	0.69439	0.74028	1.16952e-05	0.000102643
HMOX1	5101.9	-1.10887	-1.35399	1.17268e-05	0.000102859
MYO5A	2790.8	0.44617	0.45714	1.17351e-05	0.00010287
TRHDE	1564.8	0.47599	0.48952	1.18726e-05	0.000104013
MSMO1	3508.7	0.45196	0.46343	1.19038e-05	0.000104224
BMI1	463	0.7072	0.75513	1.21225e-05	0.000106075
ROR1	772.2	0.49385	0.50894	1.21423e-05	0.000106185
RUSC1	814.9	-0.49149	-0.50672	1.21874e-05	0.000106498
RP11-890B15.3	212.4	0.72966	0.7799	1.21926e-05	0.000106498
MARVELD1	4133.4	0.34345	0.34837	1.22391e-05	0.00010684
HEATR5A	1656.2	0.4478	0.45889	1.22473e-05	0.000106849
EPDR1	984.2	0.48236	0.49637	1.23673e-05	0.000107816
PGF	604.5	0.65147	0.68869	1.23729e-05	0.000107816
G3BP2	5177	0.45375	0.46533	1.26558e-05	0.000110215
ANXA7	4047.5	-0.35396	-0.35943	1.28244e-05	0.000111618
HSP90B1	34521.4	-0.46355	-0.47605	1.30061e-05	0.000113131
RBL1	128.4	-0.95947	-1.08884	1.31304e-05	0.000114145
ALAS1	1354.5	-0.38815	-0.39535	1.32453e-05	0.000115076
GLCE	909.3	0.48045	0.49459	1.32886e-05	0.000115383
PACRGL	341.5	0.60298	0.63128	1.33123e-05	0.000115521
MMP2	116470	0.44494	0.45595	1.33517e-05	0.000115794
XIAP	1563.5	0.57519	0.60011	1.33974e-05	0.000116121
NCOA3	3161.9	0.45555	0.46745	1.35513e-05	0.000117386
GOLGA4	6667.2	0.53511	0.55479	1.36277e-05	0.000117923
ZBTB47	3516.8	0.38488	0.39194	1.36294e-05	0.000117923
TBC1D8B	937.5	0.51295	0.53008	1.3819e-05	0.000119493
RHOA	16659.5	0.34731	0.35247	1.38929e-05	0.000120061
MRPL15	1151	-0.43278	-0.44288	1.39692e-05	0.000120649
ANTXR1	19582.3	0.40681	0.41521	1.39936e-05	0.000120788
NUDT4	741.2	0.57416	0.5988	1.40914e-05	0.000121561
ERCC6	1439.6	0.40402	0.4122	1.41479e-05	0.000121977
VPS45	1010.6	-0.43669	-0.4471	1.42239e-05	0.00012256
SNHG19	196.5	-0.7507	-0.81187	1.42382e-05	0.000122611
CERS6	1689.5	0.40186	0.40992	1.44333e-05	0.000124218
SLC44A2	6276.3	0.38741	0.39463	1.44439e-05	0.000124237
HTRA3	1009.7	-0.53555	-0.5551	1.48655e-05	0.000127787
PHLDA1	3609.6	0.59712	0.62575	1.49905e-05	0.000128787
CHIC2	1068.4	0.42133	0.43081	1.51308e-05	0.000129915
CAMKK1	326.8	-0.6717	-0.71429	1.51765e-05	0.000130232
TRAF7	3655.5	0.3379	0.34269	1.52237e-05	0.00013056
CAV2	3007.5	0.35125	0.35663	1.52391e-05	0.000130615
CHAF1A	200.7	-0.74927	-0.80769	1.53301e-05	0.000131319
POC1A	125.8	-0.89408	-0.99815	1.54095e-05	0.000131922
MTMR1	1187.6	0.42383	0.43352	1.54585e-05	0.000132264
GGPS1	1229.1	0.45223	0.46408	1.54691e-05	0.000132278
SRSF11	2944.1	0.35713	0.36282	1.56634e-05	0.00013386
MRPL16	911	-0.43487	-0.44512	1.57213e-05	0.000134277
TRAPPC8	2003.4	0.3611	0.367	1.57562e-05	0.000134497
SLF2	882.8	0.50676	0.52367	1.59952e-05	0.000136457
LRRFIP1	5329.7	0.52579	0.54472	1.61613e-05	0.000137795
CAPN1	5069.9	0.31693	0.3209	1.62309e-05	0.000138308
UBE2K	2401.3	-0.40141	-0.40989	1.64359e-05	0.000139973
EWSR1	5832.6	-0.38954	-0.39706	1.64925e-05	0.000140373
RNF187	4417.4	-0.34068	-0.34571	1.65966e-05	0.000141177
SEPHS2	1988.1	-0.41278	-0.42157	1.66738e-05	0.000141752
HUNK	107.3	1.00602	1.16336	1.67387e-05	0.00014222
NR2F1	1437.6	-0.41037	-0.41922	1.70186e-05	0.000144515
HPRT1	508.1	-0.51701	-0.53504	1.70432e-05	0.00014464
AGPS	1918.7	0.43644	0.44715	1.71837e-05	0.000145748
AC005682.5	94.1	1.0176	1.19423	1.72054e-05	0.000145847
VPS26A	2328.7	-0.44782	-0.45986	1.72282e-05	0.000145956
GDF5	315.4	0.90364	1.02333	1.74912e-05	0.000148099
PRKCDBP	2576.8	-0.44684	-0.4583	1.7631e-05	0.000149197
AFF3	1090.4	-0.46997	-0.48299	1.77423e-05	0.000150051
STAT3	7933.9	-0.42839	-0.4385	1.78377e-05	0.000150771
GIT1	1537.3	0.42223	0.43194	1.78922e-05	0.000151144
RFC2	291	-0.65947	-0.69826	1.7987e-05	0.000151858
KCTD20	5280.8	-0.47612	-0.49023	1.80426e-05	0.00015224
VPS37B	1325.8	0.45723	0.46963	1.81979e-05	0.000153462
PPP2R3A	1575.5	0.56382	0.58777	1.82121e-05	0.000153493
KIAA1324	76.2	1.04516	1.25504	1.82966e-05	0.000154117
MIR22HG	3850.2	-0.37056	-0.37696	1.833e-05	0.000154309
LIPA	6445.4	0.58855	0.61584	1.83504e-05	0.000154392
EFR3A	6023.5	0.49829	0.51454	1.83962e-05	0.000154647
HEXB	7495	0.37153	0.3781	1.84067e-05	0.000154647
IQCE	1057.5	0.43166	0.44196	1.84124e-05	0.000154647
SF3B4	1981.5	-0.40873	-0.41764	1.84404e-05	0.000154794
PIP5K1C	4527	0.41826	0.42769	1.87695e-05	0.000157466
SLC38A11	124.4	0.86965	0.97298	1.87956e-05	0.000157595
ANAPC13	1898.3	0.42272	0.43252	1.88143e-05	0.000157661
NR4A3	209	0.81802	0.90799	1.88913e-05	0.000158216
LPGAT1	3139.8	0.43237	0.44285	1.93069e-05	0.000161605
C22orf29	939.7	-0.57598	-0.60097	1.97161e-05	0.000164935
ZMPSTE24	2410.9	0.42699	0.4371	1.97795e-05	0.000165371
EBLN3P	1548.1	0.44233	0.45357	1.98658e-05	0.000165998
SLC35D1	1377.2	-0.46627	-0.47955	1.98955e-05	0.000166151
VPS13C	2600.6	0.58386	0.61092	2.00423e-05	0.000167282
C11orf58	2751.9	0.3819	0.38911	2.01047e-05	0.000167707
MYOZ1	45.2	-1.2746	-1.77035	2.01897e-05	0.00016832
PRR15	105.6	-1.02384	-1.24135	2.02555e-05	0.000168773
ZNF721	313	0.68536	0.73221	2.0313e-05	0.000169156
FLI1	445.4	0.57175	0.59716	2.03955e-05	0.000169746
SLC12A2	852.7	-0.52743	-0.54756	2.04204e-05	0.000169857
PIEZO2	1441.2	0.57512	0.60089	2.06661e-05	0.000171803
SYNE2	241.4	-0.86066	-0.95652	2.06946e-05	0.000171942
KRT18	203	-0.75302	-0.8144	2.07117e-05	0.000171987
TSPAN18	128.8	-0.94116	-1.06405	2.07808e-05	0.000172463
LRPAP1	4229.2	0.37438	0.38118	2.08397e-05	0.000172854
STARD13	1124	0.50011	0.51663	2.09025e-05	0.000173277
ID2	4125	0.51391	0.53195	2.09423e-05	0.000173509
PAK2	3585.7	0.38994	0.39759	2.14456e-05	0.000177578
VPS36	1064.8	-0.40492	-0.41401	2.15662e-05	0.000178476
YPEL3	454.2	0.62782	0.66162	2.16608e-05	0.000179157
RP3-425C14.4	67.3	1.10078	1.35423	2.17897e-05	0.000180121
AP2S1	3327.1	-0.33135	-0.3361	2.19783e-05	0.000181578
GCH1	145.5	-1.15187	-1.58512	2.21802e-05	0.000183143
TRMT10A	156.9	-0.83083	-0.9229	2.23045e-05	0.000184065
CDCA2	85.2	-0.99298	-1.14202	2.23973e-05	0.000184727
DCAF16	491.3	0.49749	0.51392	2.26037e-05	0.000186325
QPCTL	243.9	-0.71989	-0.77476	2.26732e-05	0.000186793
PLK3	1132.4	0.59168	0.62029	2.27446e-05	0.000187244
TMEM68	394.9	0.59668	0.62646	2.27536e-05	0.000187244
CIART	68.9	-1.11782	-1.43433	2.28551e-05	0.000187974
AARD	179	-0.86993	-0.96242	2.29068e-05	0.000188294
EMG1	1051.1	-0.42586	-0.43614	2.3085e-05	0.000189652
CLIC3	65	-1.04187	-1.22783	2.31846e-05	0.000190363
ATF2	1597.7	-0.51083	-0.52936	2.32454e-05	0.000190755
TRIM23	583.8	-0.5493	-0.57232	2.32947e-05	0.000191053
KCNC4	427	0.5124	0.52982	2.34378e-05	0.000192119
URB2	525.4	-0.52712	-0.54594	2.3462e-05	0.00019221
MOB1B	1135.2	0.5312	0.55171	2.3497e-05	0.000192389
DENND6A	450.8	-0.542	-0.56513	2.38621e-05	0.000195269
DTYMK	422.5	-0.59447	-0.62382	2.39392e-05	0.000195695
TNPO1	8255.1	0.40719	0.41618	2.39409e-05	0.000195695
HMGN2	591.3	-0.50495	-0.52162	2.40508e-05	0.000196484
KIAA1551	651.8	0.58179	0.60925	2.40725e-05	0.000196552
ZFP91	3545.8	0.38609	0.39369	2.43036e-05	0.000198328
SPG21	3113.3	0.34078	0.34596	2.46123e-05	0.000200735
SSR1	7182.9	0.42854	0.43903	2.46902e-05	0.000201259
ACTA2	24412.4	-1.01927	-1.19962	2.47131e-05	0.000201334
C10orf88	295.4	0.61885	0.6518	2.47455e-05	0.000201485
PPIP5K2	1725.5	-0.42186	-0.43176	2.47646e-05	0.000201529
HDAC1	2447.5	-0.3598	-0.36597	2.48606e-05	0.000202197
UCP2	40	-1.23093	-1.5916	2.50023e-05	0.000203237
TMF1	3221.7	0.46833	0.48216	2.50248e-05	0.000203308
USP54	627.1	-0.55251	-0.57661	2.51151e-05	0.000203928
TBC1D22B	574.1	0.54333	0.56545	2.52239e-05	0.000204698
NFKBIE	351.8	0.58982	0.6182	2.53129e-05	0.000205306
RASA3	4063.7	0.43747	0.44865	2.55159e-05	0.000206838
GPATCH4	1207.4	-0.38815	-0.39592	2.5897e-05	0.000209812
TBL1XR1	1549.5	0.46965	0.48353	2.6085e-05	0.000211218
SCCPDH	1292.2	-0.39017	-0.39793	2.61578e-05	0.00021169
TCN2	503.9	-0.54492	-0.5673	2.61754e-05	0.000211716
TAF3	546.8	0.52055	0.54	2.62987e-05	0.000212595
PEX19	1526.3	-0.36419	-0.37083	2.64274e-05	0.000213518
USP24	2238.5	0.42307	0.43325	2.67727e-05	0.000216189
YOD1	384.6	0.59247	0.62108	2.68109e-05	0.000216378
SEMA3D	1815.4	0.66983	0.71366	2.69384e-05	0.000217288
FLOT1	5077.1	-0.30987	-0.31379	2.70656e-05	0.000218121
RFC3	81.2	-0.99405	-1.15708	2.70715e-05	0.000218121
EHD4	2324.8	-0.59907	-0.62992	2.71779e-05	0.000218857
RNF11	3495.9	-0.3753	-0.38253	2.7354e-05	0.000220154
NR1H2	2354.5	0.40248	0.41123	2.73909e-05	0.000220331
IER5L	918.1	-0.64991	-0.68982	2.75065e-05	0.000221059
ABHD5	1164.5	0.46305	0.47674	2.75116e-05	0.000221059
LMAN1	7503.5	0.3406	0.34582	2.80236e-05	0.000225049
KCNH5	41.5	1.286	1.82399	2.85329e-05	0.000229014
CEMIP	25477.7	0.4272	0.43776	2.86377e-05	0.000229729
PHB	2590.8	-0.3284	-0.33309	2.89685e-05	0.000232256
TMEM243	649.3	0.54016	0.56229	2.90411e-05	0.00023271
TMEM167A	2728.2	0.44243	0.45421	2.90912e-05	0.000232984
DNM1	1269.1	0.45412	0.46702	2.9178e-05	0.000233509
NSF	1943.1	0.34745	0.35302	2.91886e-05	0.000233509
ZNF614	450.3	-0.5693	-0.59593	2.92342e-05	0.000233746
RASEF	101.5	1.11258	1.44588	2.93445e-05	0.0002345
SUZ12	1213.1	0.47277	0.48739	2.96469e-05	0.000236787
TXN	6631.5	0.34432	0.34978	2.99499e-05	0.000239077
EXOC1	1664.3	0.38296	0.39053	3.00025e-05	0.000239366
FKBP5	389	-0.65105	-0.69053	3.0083e-05	0.000239878
FAM196B	289	-0.64039	-0.67487	3.01358e-05	0.000240169
ATPIF1	1091.5	-0.42984	-0.44069	3.03276e-05	0.000241565
APLP1	185.8	0.71782	0.771	3.05394e-05	0.00024312
DCLRE1B	163	-0.73425	-0.78969	3.08316e-05	0.000245313
FANCA	76	-1.00345	-1.17681	3.10149e-05	0.000246638
RP11-708J19.1	29.4	-1.29959	-1.9363	3.11469e-05	0.000247552
BBS10	532.4	0.57049	0.59675	3.12816e-05	0.000248489
CFAP36	1018.9	0.40518	0.41424	3.18228e-05	0.000252651
WNT5B	5501.2	0.38474	0.39249	3.18764e-05	0.000252939
BRAF	995.9	0.50987	0.52845	3.2291e-05	0.00025609
SH3GLB1	5583	0.50256	0.52042	3.24882e-05	0.000257515
NLGN4Y	529.3	0.49607	0.51318	3.26335e-05	0.000258497
SCG5	257.3	0.65255	0.69571	3.26701e-05	0.000258497
NEK9	3737.5	0.38193	0.38951	3.26757e-05	0.000258497
KIF18A	135.6	-0.86477	-0.96597	3.26828e-05	0.000258497
RABGEF1	2191.8	0.4197	0.42986	3.27606e-05	0.000258973
SMARCD2	1534.3	-0.39148	-0.39969	3.31283e-05	0.000261739
RXRA	2407.4	-0.34894	-0.35469	3.33347e-05	0.000263227
TMED2	9258.2	0.37012	0.37702	3.33669e-05	0.000263339
ABI3BP	4490.9	0.31635	0.32061	3.34694e-05	0.000264006
AGTRAP	1036.5	-0.4179	-0.42793	3.35791e-05	0.000264729
TRIM3	687.6	0.45405	0.46699	3.37324e-05	0.000265794
ZNF93	95.9	-0.94714	-1.08476	3.38419e-05	0.000266433
ARSK	358.8	0.61687	0.652	3.38498e-05	0.000266433
SUGP2	2101.1	0.37164	0.37864	3.39087e-05	0.000266753
INTS7	852.5	-0.49621	-0.51361	3.40336e-05	0.000267592
SELENOH	798.4	-0.5137	-0.53343	3.42226e-05	0.000268934
PLPPR2	2398.3	0.35304	0.35903	3.45656e-05	0.000271484
C16orf45	3214.1	0.38009	0.38759	3.49722e-05	0.00027453
SRSF2	4223.2	-0.3898	-0.39792	3.50811e-05	0.000275141
DYRK1B	546	0.48518	0.50118	3.50908e-05	0.000275141
CXorf23	358.3	0.57303	0.59997	3.51063e-05	0.000275141
AUNIP	18.6	-1.36146	-2.58318	3.55281e-05	0.000278297
DNAJC9	223.9	-0.7266	-0.78365	3.55601e-05	0.000278399
CD320	582.1	-0.59736	-0.62888	3.62205e-05	0.000283418
SPTY2D1	1501.5	0.44061	0.4525	3.63704e-05	0.000284439
NDUFC2	581.7	0.55616	0.58119	3.65491e-05	0.000285683
AHR	970.6	0.57111	0.59798	3.69508e-05	0.000288669
MAP9	739	0.52844	0.54985	3.69944e-05	0.000288856
PCMTD1	940.6	0.59979	0.63098	3.71345e-05	0.000289796
ZNF45	561.2	-0.49214	-0.50906	3.72851e-05	0.000290806
FAM20B	3075.3	0.46296	0.47691	3.73037e-05	0.000290806
BCL2	74.5	-1.06299	-1.37894	3.74673e-05	0.000291913
ZBTB8A	172.1	0.71456	0.76905	3.74856e-05	0.000291913
OSBPL5	1466.5	-0.41611	-0.42615	3.75666e-05	0.000292389
SMIM14	1834.8	-0.468	-0.48314	3.76372e-05	0.000292783
RBM14	1273.2	-0.43743	-0.44909	3.80246e-05	0.000295639
FRAT2	155.1	-0.90626	-1.03717	3.82076e-05	0.000296904
CDC42SE2	490.9	0.53702	0.55924	3.83718e-05	0.000298022
SGO1	15	-1.36574	-2.76302	3.84398e-05	0.000298392
IFI16	6728.3	-0.56313	-0.59021	3.86558e-05	0.00029991
RSAD1	747.3	-0.52148	-0.54193	3.87005e-05	0.000300098
MTMR2	2824.5	-0.40084	-0.40991	3.87431e-05	0.000300269
RRBP1	19028.6	0.3924	0.40083	3.92227e-05	0.000303826
H1FX	931.7	-0.50275	-0.52149	3.94754e-05	0.000305621
PIK3R1	2491.8	0.53739	0.56003	3.96547e-05	0.000306848
FOXN3	3273.3	-0.47999	-0.49575	3.98108e-05	0.000307892
MAD2L2	625.9	-0.47718	-0.49287	3.9933e-05	0.000308675
TGFBR2	10823.2	0.27894	0.28191	4.00785e-05	0.000309543
HNRNPM	4275.2	-0.29637	-0.29995	4.00936e-05	0.000309543
REEP3	2306	0.46553	0.47957	4.01087e-05	0.000309543
FNDC3B	8201.9	0.42641	0.43732	4.01497e-05	0.000309696
SLC38A6	444.2	0.52503	0.54648	4.01901e-05	0.000309844
GRK6	845.4	-0.47533	-0.49096	4.08074e-05	0.000314438
ORC6	99.2	-1.00986	-1.22657	4.08838e-05	0.000314861
TBC1D19	579	0.53549	0.55808	4.09594e-05	0.000315277
TMEM178B	97.5	1.099	1.38811	4.11924e-05	0.000316905
PHB2	5023.5	-0.3196	-0.32413	4.13829e-05	0.000318203
PHGDH	7151.5	-0.31388	-0.31818	4.15394e-05	0.000319239
IKBKAP	1429	0.38885	0.39708	4.16629e-05	0.00032002
HAUS4	211.1	-0.68267	-0.7317	4.18408e-05	0.000321173
PINK1-AS	645.4	0.45435	0.46773	4.18786e-05	0.000321173
MXRA8	16043.3	0.41822	0.42859	4.18788e-05	0.000321173
BRCA1	117.6	-0.88697	-0.99961	4.27129e-05	0.000327399
TMEM8A	4552.9	0.34285	0.34848	4.28634e-05	0.00032838
CDIP1	415.2	0.53755	0.55977	4.31337e-05	0.000330278
CREBRF	702	0.63997	0.681	4.32665e-05	0.000331122
GRB14	27	1.25761	1.76293	4.33022e-05	0.000331222
DNAJC10	5498.9	-0.37024	-0.37739	4.37659e-05	0.000334518
HNRNPH3	2497.9	-0.32896	-0.33389	4.37819e-05	0.000334518
ETNK1	701.3	0.56686	0.59382	4.38016e-05	0.000334518
MORC4	2046.6	0.39592	0.40472	4.47066e-05	0.000341252
MAST4	1173.3	0.45419	0.46776	4.48091e-05	0.000341856
PCDHGA7	171.7	-0.73502	-0.80089	4.49259e-05	0.000342569
MTSS1L	4423.3	-0.33953	-0.34512	4.52647e-05	0.000344972
TCAF1	799.1	-0.4701	-0.48494	4.54018e-05	0.000345837
ATP2B1	7957.4	-0.33068	-0.33578	4.58183e-05	0.000348829
PLXNA4	131	0.90796	1.03564	4.5956e-05	0.000349696
ALDOA	21448.5	-0.28874	-0.2921	4.64891e-05	0.000353568
FAM46B	33.9	-1.30076	-1.97694	4.65905e-05	0.000354156
ENKD1	289.5	0.63929	0.67923	4.67423e-05	0.000355125
NFYB	740.7	-0.43895	-0.45107	4.67671e-05	0.00035513
TMED8	895.4	0.49585	0.51388	4.68853e-05	0.000355842
ARRDC1-AS1	185.7	-0.68923	-0.74025	4.70479e-05	0.000356892
PDGFRA	9023.1	0.35393	0.36018	4.73564e-05	0.000359046
RBM38	173.2	-0.70222	-0.75655	4.76864e-05	0.00036136
TCTN1	834	0.41222	0.4222	4.78184e-05	0.000362174
BCL2L13	3225.2	-0.47706	-0.49336	4.82488e-05	0.000365245
ERP29	3607.1	-0.34829	-0.35432	4.84747e-05	0.000366765
EIF4E2	3009.6	0.40786	0.41761	4.87776e-05	0.000368866
LETMD1	567.4	-0.5966	-0.62899	4.88393e-05	0.000369143
DACT3	613.6	0.47176	0.48737	4.89314e-05	0.000369648
SNX3	4678.5	0.34611	0.35201	4.98725e-05	0.000376563
RAP1GAP2	271.7	0.73716	0.80117	5.01207e-05	0.000378242
KBTBD2	1358.4	-0.4745	-0.49099	5.01488e-05	0.000378259
DNAJC6	402.3	-0.56015	-0.58887	5.03977e-05	0.000379941
TRIM14	1291.1	-0.9981	-1.21905	5.05821e-05	0.000381135
GGT5	186.3	-0.77667	-0.8552	5.11959e-05	0.000385561
MRPL50	496.8	0.50085	0.51961	5.13412e-05	0.000386457
TRPC6	355.4	-0.57642	-0.60393	5.14453e-05	0.000387042
PGD	4618.4	-0.34667	-0.35264	5.17181e-05	0.000388895
TSPY26P	205.9	-0.73746	-0.79874	5.17466e-05	0.000388909
CELSR3	189	0.75547	0.82372	5.19407e-05	0.000390168
RB1CC1	2755.1	0.41437	0.42473	5.22597e-05	0.000392363
SLC18B1	312.9	-0.67087	-0.72407	5.23662e-05	0.000392961
IFNGR2	2450.5	0.33236	0.3376	5.307e-05	0.000398039
HEXIM1	1113.9	-0.46653	-0.48116	5.35093e-05	0.000401128
MTPN	6886.4	-0.3596	-0.36633	5.35951e-05	0.000401566
RUVBL2	1783.7	-0.36681	-0.37388	5.3762e-05	0.00040261
CSNK1D	3765.7	-0.32437	-0.32924	5.39755e-05	0.000404002
ETV4	150.3	0.77142	0.84752	5.41355e-05	0.000404993
MED20	741.1	-0.55576	-0.58151	5.42757e-05	0.000405835
SNHG3	351	-0.60366	-0.63809	5.44226e-05	0.000406725
SLC35B1	1846.1	-0.40136	-0.4108	5.45248e-05	0.000407281
WDR36	1324.7	0.39899	0.4082	5.4647e-05	0.000407852
INPP4B	1059.3	0.64837	0.69152	5.46568e-05	0.000407852
GAPDH	61050.6	-0.35145	-0.3577	5.51256e-05	0.00041114
FBL	2320.5	-0.33621	-0.34155	5.55056e-05	0.000413764
C1orf198	7341.8	-0.45527	-0.46924	5.55774e-05	0.000414088
VLDLR-AS1	108.4	-0.88146	-1.01842	5.56693e-05	0.000414562
UST	1190.1	0.43041	0.44225	5.57521e-05	0.000414968
PXK	2395.6	-0.51668	-0.53809	5.58517e-05	0.000415498
NAA30	1033.8	0.43893	0.4514	5.60275e-05	0.000416595
CARS2	1334.2	-0.3764	-0.38452	5.60771e-05	0.000416751
C10orf10	26.8	-1.3192	-2.65588	5.63142e-05	0.000418301
INHBB	844.3	0.42007	0.4305	5.66562e-05	0.000420628
MESDC1	786.4	-0.4579	-0.47243	5.75516e-05	0.00042706
NES	1824.1	-0.43863	-0.45054	5.77044e-05	0.000427977
PDGFRL	122.9	0.83639	0.93914	5.78862e-05	0.000429108
MPHOSPH8	1191.7	0.36166	0.36848	5.81064e-05	0.000430522
RAB4A	970.2	0.42988	0.44165	5.81502e-05	0.000430629
EMSY	778.3	0.46804	0.48325	5.86439e-05	0.000434065
MRPL34	599.7	0.57542	0.60508	5.88186e-05	0.00043502
SNHG7	390.4	-0.54696	-0.57177	5.88322e-05	0.00043502
TRAP1	1140.4	-0.38063	-0.38855	5.92438e-05	0.000437842
RAD1	893	-0.44772	-0.46136	5.98139e-05	0.000441833
CENPO	533.2	-0.47475	-0.49041	6.0006e-05	0.000443028
MRPL40	692.4	-0.454	-0.4678	6.08826e-05	0.000449274
RNF114	2758.5	-0.59701	-0.63175	6.19634e-05	0.000457019
ALDH3B1	1429	-0.45481	-0.46889	6.21021e-05	0.000457812
ABCB7	428.7	-0.53878	-0.56368	6.21753e-05	0.00045812
PQLC3	637.2	-0.4779	-0.49441	6.26385e-05	0.000461301
CLASP1	2277.7	0.36651	0.37374	6.29979e-05	0.000463715
TPM2	32217.2	-0.43143	-0.44336	6.34926e-05	0.000467122
INMT	13	-1.3248	-3.26967	6.35382e-05	0.000467223
ATG2B	1807	0.39162	0.4005	6.41098e-05	0.000471189
HP1BP3	4235.8	0.31035	0.3147	6.45658e-05	0.000474303
C9orf3	1999.7	-0.47237	-0.48812	6.46929e-05	0.000474998
DECR1	1547	-0.45401	-0.46836	6.48259e-05	0.00047541
USP31	445.7	0.61674	0.65364	6.48356e-05	0.00047541
ADAMTS3	82.2	1.01419	1.24078	6.48582e-05	0.00047541
CHEK2	243.2	-0.71505	-0.78353	6.48788e-05	0.00047541
[truncated: 2,242 more rows]
