# Supplementary material for: Ribosome biogenesis restricts innate immune responses to virus infection and DNA
Source: eLife journal article supplement (doi:10.7554/elife.49551), 2019-12-16
Supplement: supp [file elife-49551-supp-v1.zip › elife_poa_e49551_Supplementary_file_3.xlsx]

## Sheet: Sheet1
Primer	Sequence (5' - 3')
45S Forward	CGGGTTATTGCTGACACGC
45S Reverse	CAACCTCTCCAGCGACAGG
CDCA8 Forward	AGTGGAAATACGAATCAAGC
CDCA8 Reverse	TCTCGATGTTGTAGAGGTTATC
CDK1 Forward	ACCTATGGAGTTGTGTATAAGG
CDK1 Reverse	GACTGACTATATTTGGATGACG
CENPF Forward	ACTCACATCAGTAAAGCAAC
CENPF Reverse	TCATTCTCCTTGATCTGACTC
DDX58 Forward	GGTATAGAGTTACAGGCATTTC
DDX58 Reverse	TTGTTTACTAGTGTTGTGGC
HMGB2 Forward	GAAAGCAGCCTAAGCTAAAGG
HMGB2 Reverse	TTCATCTTCATCCTCTTCCTC
IFIH1 Forward	GATTAAGTGGTGATACCCAAC
IFIH1 Reverse	GTCTGACAATTGAACACCAG
IFIT2 Forward	ACCATGAGTGAGAACAATAAG
IFIT2 Reverse	TTAGATAGGCCAGTAGGTTG
IFIT3 Forward	ATGAGTGAGGTCACCAAG
IFIT3 Reverse	CCTTGAATAAGTTCCAGGTG
IFNB1 Forward	GAAAGAAGATTTCACCAGGG
IFNB1 Reverse	CCTTCAGGTAATGCAGAATC
ISG15 Forward	AGATCACCCAGAAGATCG
ISG15 Reverse	TGTTATTCCTCACCAGGATG
OAS3 Forward	AGTGTACCAAGATCTCCAAG
OAS3 Reverse	ATGGTCCAGTAGATACAGAG
pHrP2-BH Forward	ACAAGCTTATTCGCCATTCAGGCTGCGC
pHrP2-BH Reverse	TATCTAGACTGGCCGTCGTTTTACAAG
RSAD2 Forward	GCTCTAAGAGAAGCAGAAAG
RSAD2 Reverse	CATCTTCTGGTTAGATTCAGG
TK1 Forward	AAAAGCACAGAGTTGATGAG
TK1 Reverse	GAGTGTCTTTGGCATACTTG
UBA7 Forward	GGAGACACAACAACTTTCTC
UBA7 Reverse	CTTATGTCTCACAGTCTTGG
