# Supplementary material for: Ribosome biogenesis restricts innate immune responses to virus infection and DNA
Source: eLife journal article supplement (doi:10.7554/elife.49551), 2019-12-16
Supplement: supp [file elife-49551-supp-v1.zip › elife_poa_e49551_Supplementary_file_4.xlsx]

## Sheet: Sheet1
siRNA	Sequence (5' - 3')
TIF-IA #1	GCCUCAUUGCCUACCAGGA[dT][dT]
TIF-IA #2	CUAGAAUUCCGUUCUUCUA[dT][dT]
HMGB2 #1	CAUCUGCCUUCUUCCUGUU[dT][dT]
HMGB2 #2	CCGUCAAUUUCGCGGAAUU[dT][dT]
UBF #1	GAAGUUCCGUACAUUGACA[dT][dT]
UBF #2	CCAUGUUCAUCUUCUCGGA[dT][dT]
TFIIIA #1	CACUAGGCAUGCUGUUGUA[dT][dT]
TFIIIA #2	AACAUUUGAUUCCUUAUCA[dT][dT]
BOP1	UCGUGCUGAAGUCAACAGA[dT][dT]
